# Supplementary material for: Successful prediction of LC8 binding to intrinsically disordered proteins sheds light on AlphaFold’s black box
Source: Front Mol Biosci. 2025 Apr 23;12:1531793. doi: 10.3389/fmolb.2025.1531793 (PMC12057147; doi:10.3389/fmolb.2025.1531793)
Supplement: Supplementary file 3 [file Table3.xlsx]

## Sheet: MI(3OMvqua)
	Affinity bins: [0, 1, 10, 100]
	Scores bins: quantiles based on full dataset
			Dataset	Full	TQT	!TQT	<18 AA	=16	=14	=12	TQT=16	TQT=14	TQT=12	!TQT=16	TQT!=12	TQT!=14	TQT!=12||14
	2client		count	108	77	31	98	54	21	13	30	18	12	24	65	59	47
		Bests	Conf. Score	0.055	0.05	0.047	0.055	0.101	0.136	0.161	0.297	0.114	0.227	0.053	0.065	0.059	0.091
			Avg pLDDT	0.096	0.134	0.058	0.094	0.115	0.074	0.247	0.204	0.188	0.41	0.055	0.145	0.161	0.172
			L->P PAE	0.129	0.199	-0.006	0.137	0.176	0.019	0.247	0.261	-0.036	0.41	0.079	0.185	0.203	0.201
			P->L PAE	0.07	0.157	0.063	0.091	0.085	0.032	0.361	0.289	0.03	0.466	0.126	0.142	0.217	0.22
			Dimer PAE	0.057	0.151	0.008	0.058	0.058	0.231	0.027	0.327	0.171	0.14	0.09	0.178	0.166	0.196
		Averages	Conf. Score	0.052	0.096	-0.041	0.051	-0.029	0.282	0.118	0.036	0.51	0.272	-0.021	0.12	0.044	0.054
			Avg pLDDT	0.06	0.125	-0.03	0.044	0.022	0.165	0.107	0.101	0.191	0.165	-0.007	0.159	0.124	0.161
			L->P PAE	0.052	0.127	-0.074	0.033	0.008	0.241	0.197	0.118	0.254	0.382	-0.059	0.144	0.168	0.175
			P->L PAE	0.048	0.145	-0.065	0.034	0.007	0.136	0.197	0.137	0.154	0.382	-0.063	0.171	0.161	0.198
			Dimer PAE	0.053	0.119	0.023	0.039	0.015	0.047	0.107	0.084	0.027	0.165	-0.02	0.094	0.151	0.137
	1client		count	109	76	33	104	63	21	10	36	18	9	27	67	58	49
		Bests	Conf. Score	0.123	0.183	-0.013	0.125	0.165	0.171	0.151	0.31	0.165	0.178	0.007	0.229	0.217	0.267
			Avg pLDDT	0.133	0.179	0.064	0.12	0.166	-0.035	0.001	0.283	-0.023	0.218	0.051	0.2	0.263	0.321
			L->P PAE	0.12	0.176	0.026	0.115	0.183	0.111	0.217	0.291	0.221	0.218	0.086	0.215	0.242	0.28
			P->L PAE	0.108	0.143	0.067	0.102	0.177	0.089	0.022	0.308	0.127	0.29	0.117	0.158	0.224	0.276
			Dimer PAE	0.11	0.192	0.015	0.113	0.095	0.353	0.228	0.215	0.429	0.478	-0.012	0.199	0.212	0.221
		Averages	Conf. Score	0.097	0.112	0.106	0.089	0.116	0.356	0.018	0.15	0.391	0.064	0.16	0.132	0.122	0.143
			Avg pLDDT	0.079	0.145	0.003	0.075	0.067	0.227	0.052	0.124	0.232	0.098	0.047	0.141	0.153	0.152
			L->P PAE	0.099	0.189	0.042	0.098	0.075	0.34	0.052	0.17	0.361	0.098	0.058	0.186	0.173	0.169
			P->L PAE	0.098	0.125	0.118	0.095	0.086	0.227	0.052	0.117	0.232	0.098	0.135	0.12	0.13	0.126
			Dimer PAE	0.091	0.125	0.103	0.089	0.124	0.309	-0.02	0.187	0.31	0.136	0.112	0.118	0.121	0.161
	Success Rate		count	89	60	29	81	40	21	12	18	18	11	22	49	42	31
			correlation	0.083	0.126	0.02	0.066	0.015	0.309	0.501	-0.017	0.331	0.48	0.022	0.135	0.099	0.089
