# Supplementary material for: Successful prediction of LC8 binding to intrinsically disordered proteins sheds light on AlphaFold’s black box
Source: Front Mol Biosci. 2025 Apr 23;12:1531793. doi: 10.3389/fmolb.2025.1531793 (PMC12057147; doi:10.3389/fmolb.2025.1531793)
Supplement: Supplementary file 14 [file Table11.xlsx]

## Sheet: linked_analysis_data
File Path	ClientType	WTorAAA	BindingStatus	Full Sequence	Rank	Conf. Score	LC8 dimer	Dimer PAE	Chain	Best Binding Region	Sequence	Average pLDDT	Average PAE (L->P)	Average PAE (P->L)	CheckedStatus	1client_File Path	1client_ClientType	1client_WTorAAA	1client_BindingStatus	1client_Full Sequence	1client_Rank	1client_Conf. Score	1client_LC8 dimer	1client_Dimer PAE	1client_Chain	1client_Best Binding Region	1client_Sequence	1client_Average pLDDT	1client_Average PAE (L->P)	1client_Average PAE (P->L)	1client_CheckedStatus
postGMF-runs\2client\WT_analysis\more_scans\ESR1\ESR1_65-80_output	2client	WT	unknown	AAAANAQVYGQTGLPY	rank_001	0.89	C-D	0.975385	D	A,3-10	AANAQVYG	91.577	1.568	2.912		postGMF-runs\1client\WT_analysis\more_scans\ESR1\ESR1_65-80_output	1client	WT	unknown	AAAANAQVYGQTGLPY	rank_009	0.82	B-C	1.26591	C	A,3-10	AANAQVYG	57.903	6.385	8.307
postGMF-runs\2client\WT_analysis\more_scans\ESR1\ESR1_65-80_output	2client	WT	unknown	AAAANAQVYGQTGLPY	rank_001	0.89	C-D	0.975385	C	B,3-10	AANAQVYG	91.241	1.603	2.943		postGMF-runs\1client\WT_analysis\more_scans\ESR1\ESR1_65-80_output	1client	WT	unknown	AAAANAQVYGQTGLPY	rank_009	0.82	B-C	1.26591	C	A,3-10	AANAQVYG	57.903	6.385	8.307
postGMF-runs\2client\WT_analysis\more_scans\ESR1\ESR1_65-80_output	2client	WT	unknown	AAAANAQVYGQTGLPY	rank_004	0.88	C-D	0.975	C	B,3-10	AANAQVYG	90.296	1.605	3.3		postGMF-runs\1client\WT_analysis\more_scans\ESR1\ESR1_65-80_output	1client	WT	unknown	AAAANAQVYGQTGLPY	rank_002	0.86	B-C	1.00375	C	A,4-11	ANAQVYGQ	57.71	6.979	8.23
postGMF-runs\2client\WT_analysis\more_scans\ESR1\ESR1_65-80_output	2client	WT	unknown	AAAANAQVYGQTGLPY	rank_004	0.88	C-D	0.975	D	A,3-10	AANAQVYG	90.015	1.62	3.372		postGMF-runs\1client\WT_analysis\more_scans\ESR1\ESR1_65-80_output	1client	WT	unknown	AAAANAQVYGQTGLPY	rank_002	0.86	B-C	1.00375	C	A,4-11	ANAQVYGQ	57.71	6.979	8.23
postGMF-runs\2client\WT_analysis\more_scans\ESR1\ESR1_65-80_output	2client	WT	unknown	AAAANAQVYGQTGLPY	rank_005	0.88	C-D	0.982692	C	B,3-10	AANAQVYG	88.751	1.734	3.61		postGMF-runs\1client\WT_analysis\more_scans\ESR1\ESR1_65-80_output	1client	WT	unknown	AAAANAQVYGQTGLPY	rank_001	0.86	B-C	1	B	A,5-12	NAQVYGQT	55.703	7.269	9.222
postGMF-runs\2client\WT_analysis\more_scans\ESR1\ESR1_65-80_output	2client	WT	unknown	AAAANAQVYGQTGLPY	rank_005	0.88	C-D	0.982692	D	A,3-10	AANAQVYG	88.68	1.728	3.632		postGMF-runs\1client\WT_analysis\more_scans\ESR1\ESR1_65-80_output	1client	WT	unknown	AAAANAQVYGQTGLPY	rank_001	0.86	B-C	1	B	A,5-12	NAQVYGQT	55.703	7.269	9.222
postGMF-runs\2client\WT_analysis\more_scans\ESR1\ESR1_65-80_output	2client	WT	unknown	AAAANAQVYGQTGLPY	rank_002	0.89	C-D	0.9775	D	A,3-10	AANAQVYG	86.951	2.281	4.229		postGMF-runs\1client\WT_analysis\more_scans\ESR1\ESR1_65-80_output	1client	WT	unknown	AAAANAQVYGQTGLPY	rank_003	0.83	B-C	1.03885	C	A,3-10	AANAQVYG	52.671	8.487	10.782
postGMF-runs\2client\WT_analysis\more_scans\ESR1\ESR1_65-80_output	2client	WT	unknown	AAAANAQVYGQTGLPY	rank_002	0.89	C-D	0.9775	C	B,3-10	AANAQVYG	86.745	2.29	4.279		postGMF-runs\1client\WT_analysis\more_scans\ESR1\ESR1_65-80_output	1client	WT	unknown	AAAANAQVYGQTGLPY	rank_003	0.83	B-C	1.03885	C	A,3-10	AANAQVYG	52.671	8.487	10.782
postGMF-runs\2client\WT_analysis\more_scans\ESR1\ESR1_65-80_output	2client	WT	unknown	AAAANAQVYGQTGLPY	rank_006	0.88	C-D	0.992308	D	A,2-9	AAANAQVY	86.774	2.058	4.163		postGMF-runs\1client\WT_analysis\more_scans\ESR1\ESR1_65-80_output	1client	WT	unknown	AAAANAQVYGQTGLPY	rank_023	0.81	B-C	1.27091	B	A,4-11	ANAQVYGQ	41.84	8.862	10.844
postGMF-runs\2client\WT_analysis\more_scans\ESR1\ESR1_65-80_output	2client	WT	unknown	AAAANAQVYGQTGLPY	rank_006	0.88	C-D	0.992308	C	B,2-9	AAANAQVY	85.953	2.205	4.402		postGMF-runs\1client\WT_analysis\more_scans\ESR1\ESR1_65-80_output	1client	WT	unknown	AAAANAQVYGQTGLPY	rank_023	0.81	B-C	1.27091	B	A,4-11	ANAQVYGQ	41.84	8.862	10.844
postGMF-runs\2client\WT_analysis\more_scans\ESR1\ESR1_65-80_output	2client	WT	unknown	AAAANAQVYGQTGLPY	rank_003	0.88	C-D	0.984286	D	B,3-10	AANAQVYG	86.541	2.177	4.224		postGMF-runs\1client\WT_analysis\more_scans\ESR1\ESR1_65-80_output	1client	WT	unknown	AAAANAQVYGQTGLPY	rank_005	0.82	B-C	1.02429	B	A,3-10	AANAQVYG	40.151	10.353	12.778
postGMF-runs\2client\WT_analysis\more_scans\ESR1\ESR1_65-80_output	2client	WT	unknown	AAAANAQVYGQTGLPY	rank_003	0.88	C-D	0.984286	C	A,3-10	AANAQVYG	86.118	2.266	4.335		postGMF-runs\1client\WT_analysis\more_scans\ESR1\ESR1_65-80_output	1client	WT	unknown	AAAANAQVYGQTGLPY	rank_005	0.82	B-C	1.02429	B	A,3-10	AANAQVYG	40.151	10.353	12.778
postGMF-runs\2client\WT_analysis\more_scans\ESR1\ESR1_65-80_output	2client	WT	unknown	AAAANAQVYGQTGLPY	rank_009	0.87	C-D	0.989615	D	A,3-10	AANAQVYG	84.719	2.364	4.642		postGMF-runs\1client\WT_analysis\more_scans\ESR1\ESR1_65-80_output	1client	WT	unknown	AAAANAQVYGQTGLPY	rank_025	0.79	B-C	1.34091	B	A,4-11	ANAQVYGQ	38.842	9.249	11.659
postGMF-runs\2client\WT_analysis\more_scans\ESR1\ESR1_65-80_output	2client	WT	unknown	AAAANAQVYGQTGLPY	rank_009	0.87	C-D	0.989615	C	B,3-10	AANAQVYG	81.765	2.921	5.315		postGMF-runs\1client\WT_analysis\more_scans\ESR1\ESR1_65-80_output	1client	WT	unknown	AAAANAQVYGQTGLPY	rank_025	0.79	B-C	1.34091	B	A,4-11	ANAQVYGQ	38.842	9.249	11.659
postGMF-runs\2client\WT_analysis\more_scans\ESR1\ESR1_65-80_output	2client	WT	unknown	AAAANAQVYGQTGLPY	rank_008	0.87	C-D	1.02346	C	A,3-10	AANAQVYG	83.711	2.291	4.618		postGMF-runs\1client\WT_analysis\more_scans\ESR1\ESR1_65-80_output	1client	WT	unknown	AAAANAQVYGQTGLPY	rank_008	0.82	B-C	1.01591	B	A,3-10	AANAQVYG	38.68	10.989	13.153
postGMF-runs\2client\WT_analysis\more_scans\ESR1\ESR1_65-80_output	2client	WT	unknown	AAAANAQVYGQTGLPY	rank_008	0.87	C-D	1.02346	D	B,3-10	AANAQVYG	83.165	2.382	4.777		postGMF-runs\1client\WT_analysis\more_scans\ESR1\ESR1_65-80_output	1client	WT	unknown	AAAANAQVYGQTGLPY	rank_008	0.82	B-C	1.01591	B	A,3-10	AANAQVYG	38.68	10.989	13.153
postGMF-runs\2client\WT_analysis\more_scans\ESR1\ESR1_65-80_output	2client	WT	unknown	AAAANAQVYGQTGLPY	rank_007	0.87	C-D	1.02423	D	B,4-11	ANAQVYGQ	83.132	2.834	5.011		postGMF-runs\1client\WT_analysis\more_scans\ESR1\ESR1_65-80_output	1client	WT	unknown	AAAANAQVYGQTGLPY	rank_022	0.81	B-C	1.18318	C	A,5-12	NAQVYGQT	32.508	9.21	12.082
postGMF-runs\2client\WT_analysis\more_scans\ESR1\ESR1_65-80_output	2client	WT	unknown	AAAANAQVYGQTGLPY	rank_007	0.87	C-D	1.02423	C	A,4-11	ANAQVYGQ	82.555	2.987	5.207		postGMF-runs\1client\WT_analysis\more_scans\ESR1\ESR1_65-80_output	1client	WT	unknown	AAAANAQVYGQTGLPY	rank_022	0.81	B-C	1.18318	C	A,5-12	NAQVYGQT	32.508	9.21	12.082
postGMF-runs\2client\WT_analysis\more_scans\ESR1\ESR1_65-80_output	2client	WT	unknown	AAAANAQVYGQTGLPY	rank_013	0.84	C-D	1.18182	D	B,4-11	ANAQVYGQ	76.081	3.139	5.613		postGMF-runs\1client\WT_analysis\more_scans\ESR1\ESR1_65-80_output	1client	WT	unknown	AAAANAQVYGQTGLPY	rank_024	0.79	B-C	1.30545	B	A,5-12	NAQVYGQT	30.497	9.692	13.19
postGMF-runs\2client\WT_analysis\more_scans\ESR1\ESR1_65-80_output	2client	WT	unknown	AAAANAQVYGQTGLPY	rank_013	0.84	C-D	1.18182	C	A,4-11	ANAQVYGQ	75.886	3.159	5.617		postGMF-runs\1client\WT_analysis\more_scans\ESR1\ESR1_65-80_output	1client	WT	unknown	AAAANAQVYGQTGLPY	rank_024	0.79	B-C	1.30545	B	A,5-12	NAQVYGQT	30.497	9.692	13.19
postGMF-runs\2client\WT_analysis\more_scans\ESR1\ESR1_65-80_output	2client	WT	unknown	AAAANAQVYGQTGLPY	rank_015	0.83	C-D	1.01231	D	B,3-10	AANAQVYG	73.722	4.365	7.279		postGMF-runs\1client\WT_analysis\more_scans\ESR1\ESR1_65-80_output	1client	WT	unknown	AAAANAQVYGQTGLPY	rank_006	0.82	B-C	0.99625	B	A,3-10	AANAQVYG	29.818	8.961	13.207
postGMF-runs\2client\WT_analysis\more_scans\ESR1\ESR1_65-80_output	2client	WT	unknown	AAAANAQVYGQTGLPY	rank_015	0.83	C-D	1.01231	C	A,3-10	AANAQVYG	72.935	4.491	7.45		postGMF-runs\1client\WT_analysis\more_scans\ESR1\ESR1_65-80_output	1client	WT	unknown	AAAANAQVYGQTGLPY	rank_006	0.82	B-C	0.99625	B	A,3-10	AANAQVYG	29.818	8.961	13.207
postGMF-runs\2client\WT_analysis\more_scans\ESR1\ESR1_65-80_output	2client	WT	unknown	AAAANAQVYGQTGLPY	rank_010	0.85	C-D	0.98875	D	B,4-11	ANAQVYGQ	73.296	4.131	7.477		postGMF-runs\1client\WT_analysis\more_scans\ESR1\ESR1_65-80_output	1client	WT	unknown	AAAANAQVYGQTGLPY	rank_018	0.81	B-C	1.03909	C	A,3-10	AANAQVYG	29.681	9.836	13.738
postGMF-runs\2client\WT_analysis\more_scans\ESR1\ESR1_65-80_output	2client	WT	unknown	AAAANAQVYGQTGLPY	rank_010	0.85	C-D	0.98875	C	A,4-11	ANAQVYGQ	71.492	4.498	7.836		postGMF-runs\1client\WT_analysis\more_scans\ESR1\ESR1_65-80_output	1client	WT	unknown	AAAANAQVYGQTGLPY	rank_018	0.81	B-C	1.03909	C	A,3-10	AANAQVYG	29.681	9.836	13.738
postGMF-runs\2client\WT_analysis\more_scans\ESR1\ESR1_65-80_output	2client	WT	unknown	AAAANAQVYGQTGLPY	rank_011	0.84	C-D	1.09182	C	A,3-10	AANAQVYG	71.69	3.603	5.902		postGMF-runs\1client\WT_analysis\more_scans\ESR1\ESR1_65-80_output	1client	WT	unknown	AAAANAQVYGQTGLPY	rank_014	0.81	B-C	0.9785	C	A,4-11	ANAQVYGQ	29.552	11.754	15.115
postGMF-runs\2client\WT_analysis\more_scans\ESR1\ESR1_65-80_output	2client	WT	unknown	AAAANAQVYGQTGLPY	rank_011	0.84	C-D	1.09182	D	B,4-11	ANAQVYGQ	69.046	3.866	6.605		postGMF-runs\1client\WT_analysis\more_scans\ESR1\ESR1_65-80_output	1client	WT	unknown	AAAANAQVYGQTGLPY	rank_014	0.81	B-C	0.9785	C	A,4-11	ANAQVYGQ	29.552	11.754	15.115
postGMF-runs\2client\WT_analysis\more_scans\ESR1\ESR1_65-80_output	2client	WT	unknown	AAAANAQVYGQTGLPY	rank_014	0.84	C-D	1.00958	C	A,4-11	ANAQVYGQ	70.572	4.544	7.991		postGMF-runs\1client\WT_analysis\more_scans\ESR1\ESR1_65-80_output	1client	WT	unknown	AAAANAQVYGQTGLPY	rank_015	0.81	B-C	0.991364	C	A,4-11	ANAQVYGQ	29.04	11.877	15.177
postGMF-runs\2client\WT_analysis\more_scans\ESR1\ESR1_65-80_output	2client	WT	unknown	AAAANAQVYGQTGLPY	rank_014	0.84	C-D	1.00958	D	B,4-11	ANAQVYGQ	68.715	4.854	8.254		postGMF-runs\1client\WT_analysis\more_scans\ESR1\ESR1_65-80_output	1client	WT	unknown	AAAANAQVYGQTGLPY	rank_015	0.81	B-C	0.991364	C	A,4-11	ANAQVYGQ	29.04	11.877	15.177
postGMF-runs\2client\WT_analysis\more_scans\ESR1\ESR1_65-80_output	2client	WT	unknown	AAAANAQVYGQTGLPY	rank_012	0.84	C-D	1.02038	D	A,5-12	NAQVYGQT	66.766	4.954	9.035		postGMF-runs\1client\WT_analysis\more_scans\ESR1\ESR1_65-80_output	1client	WT	unknown	AAAANAQVYGQTGLPY	rank_011	0.82	B-C	0.991154	B	A,4-11	ANAQVYGQ	28.933	11.049	14.468
postGMF-runs\2client\WT_analysis\more_scans\ESR1\ESR1_65-80_output	2client	WT	unknown	AAAANAQVYGQTGLPY	rank_012	0.84	C-D	1.02038	C	B,5-12	NAQVYGQT	66.156	5.077	9.088		postGMF-runs\1client\WT_analysis\more_scans\ESR1\ESR1_65-80_output	1client	WT	unknown	AAAANAQVYGQTGLPY	rank_011	0.82	B-C	0.991154	B	A,4-11	ANAQVYGQ	28.933	11.049	14.468
postGMF-runs\2client\WT_analysis\more_scans\ESR1\ESR1_65-80_output	2client	WT	unknown	AAAANAQVYGQTGLPY	rank_017	0.81	C-D	1.16636	D	A,4-11	ANAQVYGQ	63.3	4.978	8.378		postGMF-runs\1client\WT_analysis\more_scans\ESR1\ESR1_65-80_output	1client	WT	unknown	AAAANAQVYGQTGLPY	rank_004	0.82	B-C	1.00136	B	A,5-12	NAQVYGQT	28.64	9.109	14.095
postGMF-runs\2client\WT_analysis\more_scans\ESR1\ESR1_65-80_output	2client	WT	unknown	AAAANAQVYGQTGLPY	rank_017	0.81	C-D	1.16636	C	B,4-11	ANAQVYGQ	61.374	5.128	8.624		postGMF-runs\1client\WT_analysis\more_scans\ESR1\ESR1_65-80_output	1client	WT	unknown	AAAANAQVYGQTGLPY	rank_004	0.82	B-C	1.00136	B	A,5-12	NAQVYGQT	28.64	9.109	14.095
postGMF-runs\2client\WT_analysis\more_scans\ESR1\ESR1_65-80_output	2client	WT	unknown	AAAANAQVYGQTGLPY	rank_016	0.82	C-D	1.02269	D	B,5-12	NAQVYGQT	57.864	6.12	10.303		postGMF-runs\1client\WT_analysis\more_scans\ESR1\ESR1_65-80_output	1client	WT	unknown	AAAANAQVYGQTGLPY	rank_019	0.81	B-C	1.01591	C	A,3-10	AANAQVYG	28.631	10.534	14.891
postGMF-runs\2client\WT_analysis\more_scans\ESR1\ESR1_65-80_output	2client	WT	unknown	AAAANAQVYGQTGLPY	rank_016	0.82	C-D	1.02269	C	A,5-12	NAQVYGQT	57.505	6.173	10.344		postGMF-runs\1client\WT_analysis\more_scans\ESR1\ESR1_65-80_output	1client	WT	unknown	AAAANAQVYGQTGLPY	rank_019	0.81	B-C	1.01591	C	A,3-10	AANAQVYG	28.631	10.534	14.891
postGMF-runs\2client\WT_analysis\more_scans\ESR1\ESR1_65-80_output	2client	WT	unknown	AAAANAQVYGQTGLPY	rank_020	0.8	C-D	1.15818	D	A,4-11	ANAQVYGQ	57.797	5.405	9.04		postGMF-runs\1client\WT_analysis\more_scans\ESR1\ESR1_65-80_output	1client	WT	unknown	AAAANAQVYGQTGLPY	rank_016	0.81	B-C	0.990455	C	A,4-11	ANAQVYGQ	28.569	11.675	15.07
postGMF-runs\2client\WT_analysis\more_scans\ESR1\ESR1_65-80_output	2client	WT	unknown	AAAANAQVYGQTGLPY	rank_020	0.8	C-D	1.15818	C	B,4-11	ANAQVYGQ	54.646	5.58	9.319		postGMF-runs\1client\WT_analysis\more_scans\ESR1\ESR1_65-80_output	1client	WT	unknown	AAAANAQVYGQTGLPY	rank_016	0.81	B-C	0.990455	C	A,4-11	ANAQVYGQ	28.569	11.675	15.07
postGMF-runs\2client\WT_analysis\more_scans\ESR1\ESR1_65-80_output	2client	WT	unknown	AAAANAQVYGQTGLPY	rank_021	0.79	C-D	1.18636	C	A,4-11	ANAQVYGQ	52.27	5.706	9.547		postGMF-runs\1client\WT_analysis\more_scans\ESR1\ESR1_65-80_output	1client	WT	unknown	AAAANAQVYGQTGLPY	rank_007	0.82	B-C	0.98875	C	A,4-11	ANAQVYGQ	28.418	10.795	14.373
postGMF-runs\2client\WT_analysis\more_scans\ESR1\ESR1_65-80_output	2client	WT	unknown	AAAANAQVYGQTGLPY	rank_021	0.79	C-D	1.18636	D	B,4-11	ANAQVYGQ	52.227	5.777	9.604		postGMF-runs\1client\WT_analysis\more_scans\ESR1\ESR1_65-80_output	1client	WT	unknown	AAAANAQVYGQTGLPY	rank_007	0.82	B-C	0.98875	C	A,4-11	ANAQVYGQ	28.418	10.795	14.373
postGMF-runs\2client\WT_analysis\more_scans\ESR1\ESR1_65-80_output	2client	WT	unknown	AAAANAQVYGQTGLPY	rank_023	0.78	C-D	1.04	D	B,4-11	ANAQVYGQ	47.076	7.647	11.958		postGMF-runs\1client\WT_analysis\more_scans\ESR1\ESR1_65-80_output	1client	WT	unknown	AAAANAQVYGQTGLPY	rank_021	0.81	B-C	1.02955	B	A,3-10	AANAQVYG	27.523	10.724	14.973
postGMF-runs\2client\WT_analysis\more_scans\ESR1\ESR1_65-80_output	2client	WT	unknown	AAAANAQVYGQTGLPY	rank_023	0.78	C-D	1.04	C	A,4-11	ANAQVYGQ	43.978	7.855	12.106		postGMF-runs\1client\WT_analysis\more_scans\ESR1\ESR1_65-80_output	1client	WT	unknown	AAAANAQVYGQTGLPY	rank_021	0.81	B-C	1.02955	B	A,3-10	AANAQVYG	27.523	10.724	14.973
postGMF-runs\2client\WT_analysis\more_scans\ESR1\ESR1_65-80_output	2client	WT	unknown	AAAANAQVYGQTGLPY	rank_018	0.81	C-D	1	C	B,4-11	ANAQVYGQ	46.796	5.474	10.077		postGMF-runs\1client\WT_analysis\more_scans\ESR1\ESR1_65-80_output	1client	WT	unknown	AAAANAQVYGQTGLPY	rank_020	0.81	B-C	1.03273	C	A,4-11	ANAQVYGQ	27.274	10.456	14.041
postGMF-runs\2client\WT_analysis\more_scans\ESR1\ESR1_65-80_output	2client	WT	unknown	AAAANAQVYGQTGLPY	rank_018	0.81	C-D	1	D	A,4-11	ANAQVYGQ	45.772	5.631	10.312		postGMF-runs\1client\WT_analysis\more_scans\ESR1\ESR1_65-80_output	1client	WT	unknown	AAAANAQVYGQTGLPY	rank_020	0.81	B-C	1.03273	C	A,4-11	ANAQVYGQ	27.274	10.456	14.041
postGMF-runs\2client\WT_analysis\more_scans\ESR1\ESR1_65-80_output	2client	WT	unknown	AAAANAQVYGQTGLPY	rank_022	0.79	C-D	1.03038	D	A,4-11	ANAQVYGQ	45.279	7.121	11.781		postGMF-runs\1client\WT_analysis\more_scans\ESR1\ESR1_65-80_output	1client	WT	unknown	AAAANAQVYGQTGLPY	rank_013	0.81	B-C	1.01636	B	A,3-10	AANAQVYG	27.266	10.287	14.209
postGMF-runs\2client\WT_analysis\more_scans\ESR1\ESR1_65-80_output	2client	WT	unknown	AAAANAQVYGQTGLPY	rank_022	0.79	C-D	1.03038	C	B,4-11	ANAQVYGQ	45.147	7.084	11.729		postGMF-runs\1client\WT_analysis\more_scans\ESR1\ESR1_65-80_output	1client	WT	unknown	AAAANAQVYGQTGLPY	rank_013	0.81	B-C	1.01636	B	A,3-10	AANAQVYG	27.266	10.287	14.209
postGMF-runs\2client\WT_analysis\more_scans\ESR1\ESR1_65-80_output	2client	WT	unknown	AAAANAQVYGQTGLPY	rank_019	0.8	C-D	1.011	C	B,4-11	ANAQVYGQ	43.841	6.096	10.657		postGMF-runs\1client\WT_analysis\more_scans\ESR1\ESR1_65-80_output	1client	WT	unknown	AAAANAQVYGQTGLPY	rank_010	0.82	B-C	1.00364	C	A,3-10	AANAQVYG	27.089	9.539	13.494
postGMF-runs\2client\WT_analysis\more_scans\ESR1\ESR1_65-80_output	2client	WT	unknown	AAAANAQVYGQTGLPY	rank_019	0.8	C-D	1.011	D	A,4-11	ANAQVYGQ	42.616	6.223	10.757		postGMF-runs\1client\WT_analysis\more_scans\ESR1\ESR1_65-80_output	1client	WT	unknown	AAAANAQVYGQTGLPY	rank_010	0.82	B-C	1.00364	C	A,3-10	AANAQVYG	27.089	9.539	13.494
postGMF-runs\2client\WT_analysis\more_scans\ESR1\ESR1_65-80_output	2client	WT	unknown	AAAANAQVYGQTGLPY	rank_024	0.78	C-D	0.98	C	B,3-10	AANAQVYG	35.704	7.666	12.112		postGMF-runs\1client\WT_analysis\more_scans\ESR1\ESR1_65-80_output	1client	WT	unknown	AAAANAQVYGQTGLPY	rank_012	0.81	B-C	1.0325	B	A,3-10	AANAQVYG	26.851	10.219	14.212
postGMF-runs\2client\WT_analysis\more_scans\ESR1\ESR1_65-80_output	2client	WT	unknown	AAAANAQVYGQTGLPY	rank_024	0.78	C-D	0.98	D	A,4-11	ANAQVYGQ	34.69	7.742	12.337		postGMF-runs\1client\WT_analysis\more_scans\ESR1\ESR1_65-80_output	1client	WT	unknown	AAAANAQVYGQTGLPY	rank_012	0.81	B-C	1.0325	B	A,3-10	AANAQVYG	26.851	10.219	14.212
postGMF-runs\2client\WT_analysis\more_scans\ESR1\ESR1_65-80_output	2client	WT	unknown	AAAANAQVYGQTGLPY	rank_025	0.78	C-D	0.993182	C	B,4-11	ANAQVYGQ	35.515	7.132	12.421		postGMF-runs\1client\WT_analysis\more_scans\ESR1\ESR1_65-80_output	1client	WT	unknown	AAAANAQVYGQTGLPY	rank_017	0.81	B-C	1.03136	C	A,3-10	AANAQVYG	25.547	11.349	14.769
postGMF-runs\2client\WT_analysis\more_scans\ESR1\ESR1_65-80_output	2client	WT	unknown	AAAANAQVYGQTGLPY	rank_025	0.78	C-D	0.993182	D	A,4-11	ANAQVYGQ	34.913	7.137	12.505		postGMF-runs\1client\WT_analysis\more_scans\ESR1\ESR1_65-80_output	1client	WT	unknown	AAAANAQVYGQTGLPY	rank_017	0.81	B-C	1.03136	C	A,3-10	AANAQVYG	25.547	11.349	14.769
postGMF-runs\2client\WT_analysis\more_scans\NRF1\NRF1_81-96_output	2client	WT	unknown	AAAAVATGKKRKRPHV	rank_001	0.8	C-D	1.26455	C	B,1-8	AAAAVATG	72.127	2.771	6.431		postGMF-runs\1client\WT_analysis\more_scans\NRF1\NRF1_81-96_output	1client	WT	unknown	AAAAVATGKKRKRPHV	rank_022	0.77	B-C	1.40042	B	A,3-10	AAVATGKK	42.542	6.729	9.83
postGMF-runs\2client\WT_analysis\more_scans\NRF1\NRF1_81-96_output	2client	WT	unknown	AAAAVATGKKRKRPHV	rank_001	0.8	C-D	1.26455	D	A,1-8	AAAAVATG	72.124	2.76	6.384		postGMF-runs\1client\WT_analysis\more_scans\NRF1\NRF1_81-96_output	1client	WT	unknown	AAAAVATGKKRKRPHV	rank_022	0.77	B-C	1.40042	B	A,3-10	AAVATGKK	42.542	6.729	9.83
postGMF-runs\2client\WT_analysis\more_scans\NRF1\NRF1_81-96_output	2client	WT	unknown	AAAAVATGKKRKRPHV	rank_005	0.79	C-D	1.29846	C	A,1-8	AAAAVATG	72.07	2.703	6.332		postGMF-runs\1client\WT_analysis\more_scans\NRF1\NRF1_81-96_output	1client	WT	unknown	AAAAVATGKKRKRPHV	rank_021	0.77	B-C	1.34714	B	A,3-10	AAVATGKK	39.769	7.425	10.323
postGMF-runs\2client\WT_analysis\more_scans\NRF1\NRF1_81-96_output	2client	WT	unknown	AAAAVATGKKRKRPHV	rank_005	0.79	C-D	1.29846	D	B,1-8	AAAAVATG	70.793	2.813	6.544		postGMF-runs\1client\WT_analysis\more_scans\NRF1\NRF1_81-96_output	1client	WT	unknown	AAAAVATGKKRKRPHV	rank_021	0.77	B-C	1.34714	B	A,3-10	AAVATGKK	39.769	7.425	10.323
postGMF-runs\2client\WT_analysis\more_scans\NRF1\NRF1_81-96_output	2client	WT	unknown	AAAAVATGKKRKRPHV	rank_006	0.79	C-D	1.28318	C	B,1-8	AAAAVATG	69.034	3.078	6.997		postGMF-runs\1client\WT_analysis\more_scans\NRF1\NRF1_81-96_output	1client	WT	unknown	AAAAVATGKKRKRPHV	rank_023	0.77	B-C	1.3775	B	A,2-9	AAAVATGK	39.744	7.45	10.576
postGMF-runs\2client\WT_analysis\more_scans\NRF1\NRF1_81-96_output	2client	WT	unknown	AAAAVATGKKRKRPHV	rank_006	0.79	C-D	1.28318	D	A,1-8	AAAAVATG	66.07	3.411	7.396		postGMF-runs\1client\WT_analysis\more_scans\NRF1\NRF1_81-96_output	1client	WT	unknown	AAAAVATGKKRKRPHV	rank_023	0.77	B-C	1.3775	B	A,2-9	AAAVATGK	39.744	7.45	10.576
postGMF-runs\2client\WT_analysis\more_scans\NRF1\NRF1_81-96_output	2client	WT	unknown	AAAAVATGKKRKRPHV	rank_019	0.77	C-D	1.39875	C	A,1-8	AAAAVATG	68.624	3.255	5.974		postGMF-runs\1client\WT_analysis\more_scans\NRF1\NRF1_81-96_output	1client	WT	unknown	AAAAVATGKKRKRPHV	rank_012	0.81	B-C	1.1005	B	A,2-9	AAAVATGK	39.266	8.285	11.708
postGMF-runs\2client\WT_analysis\more_scans\NRF1\NRF1_81-96_output	2client	WT	unknown	AAAAVATGKKRKRPHV	rank_019	0.77	C-D	1.39875	D	B,1-8	AAAAVATG	67.579	3.324	6.084		postGMF-runs\1client\WT_analysis\more_scans\NRF1\NRF1_81-96_output	1client	WT	unknown	AAAAVATGKKRKRPHV	rank_012	0.81	B-C	1.1005	B	A,2-9	AAAVATGK	39.266	8.285	11.708
postGMF-runs\2client\WT_analysis\more_scans\NRF1\NRF1_81-96_output	2client	WT	unknown	AAAAVATGKKRKRPHV	rank_004	0.79	C-D	1.00909	C	A,2-9	AAAVATGK	49.8	6.338	10.823		postGMF-runs\1client\WT_analysis\more_scans\NRF1\NRF1_81-96_output	1client	WT	unknown	AAAAVATGKKRKRPHV	rank_002	0.82	B-C	1.016	B	A,2-9	AAAVATGK	39.219	9.104	12.485
postGMF-runs\2client\WT_analysis\more_scans\NRF1\NRF1_81-96_output	2client	WT	unknown	AAAAVATGKKRKRPHV	rank_004	0.79	C-D	1.00909	D	B,2-9	AAAVATGK	47.213	6.467	11.068		postGMF-runs\1client\WT_analysis\more_scans\NRF1\NRF1_81-96_output	1client	WT	unknown	AAAAVATGKKRKRPHV	rank_002	0.82	B-C	1.016	B	A,2-9	AAAVATGK	39.219	9.104	12.485
postGMF-runs\2client\WT_analysis\more_scans\NRF1\NRF1_81-96_output	2client	WT	unknown	AAAAVATGKKRKRPHV	rank_020	0.76	C-D	1.35643	C	A,3-10	AAVATGKK	48.656	4.704	9.153		postGMF-runs\1client\WT_analysis\more_scans\NRF1\NRF1_81-96_output	1client	WT	unknown	AAAAVATGKKRKRPHV	rank_025	0.77	B-C	1.38292	C	A,3-10	AAVATGKK	38.691	7.336	10.278
postGMF-runs\2client\WT_analysis\more_scans\NRF1\NRF1_81-96_output	2client	WT	unknown	AAAAVATGKKRKRPHV	rank_020	0.76	C-D	1.35643	D	B,3-10	AAVATGKK	48.335	4.831	9.216		postGMF-runs\1client\WT_analysis\more_scans\NRF1\NRF1_81-96_output	1client	WT	unknown	AAAAVATGKKRKRPHV	rank_025	0.77	B-C	1.38292	C	A,3-10	AAVATGKK	38.691	7.336	10.278
postGMF-runs\2client\WT_analysis\more_scans\NRF1\NRF1_81-96_output	2client	WT	unknown	AAAAVATGKKRKRPHV	rank_007	0.79	C-D	1.0045	C	A,2-9	AAAVATGK	48.493	6.305	10.943		postGMF-runs\1client\WT_analysis\more_scans\NRF1\NRF1_81-96_output	1client	WT	unknown	AAAAVATGKKRKRPHV	rank_014	0.81	B-C	1.073	C	A,2-9	AAAVATGK	34.44	9.418	12.5
postGMF-runs\2client\WT_analysis\more_scans\NRF1\NRF1_81-96_output	2client	WT	unknown	AAAAVATGKKRKRPHV	rank_007	0.79	C-D	1.0045	D	B,2-9	AAAVATGK	47.534	6.315	10.957		postGMF-runs\1client\WT_analysis\more_scans\NRF1\NRF1_81-96_output	1client	WT	unknown	AAAAVATGKKRKRPHV	rank_014	0.81	B-C	1.073	C	A,2-9	AAAVATGK	34.44	9.418	12.5
postGMF-runs\2client\WT_analysis\more_scans\NRF1\NRF1_81-96_output	2client	WT	unknown	AAAAVATGKKRKRPHV	rank_013	0.78	C-D	1.041	D	A,2-9	AAAVATGK	47.081	6.693	11.006		postGMF-runs\1client\WT_analysis\more_scans\NRF1\NRF1_81-96_output	1client	WT	unknown	AAAAVATGKKRKRPHV	rank_024	0.77	B-C	1.33885	C	A,3-10	AAVATGKK	33.816	8.793	11.652
postGMF-runs\2client\WT_analysis\more_scans\NRF1\NRF1_81-96_output	2client	WT	unknown	AAAAVATGKKRKRPHV	rank_013	0.78	C-D	1.041	C	B,2-9	AAAVATGK	46.324	6.625	11.025		postGMF-runs\1client\WT_analysis\more_scans\NRF1\NRF1_81-96_output	1client	WT	unknown	AAAAVATGKKRKRPHV	rank_024	0.77	B-C	1.33885	C	A,3-10	AAVATGKK	33.816	8.793	11.652
postGMF-runs\2client\WT_analysis\more_scans\NRF1\NRF1_81-96_output	2client	WT	unknown	AAAAVATGKKRKRPHV	rank_025	0.74	C-D	1.41167	C	B,2-9	AAAVATGK	46.69	5.12	9.519		postGMF-runs\1client\WT_analysis\more_scans\NRF1\NRF1_81-96_output	1client	WT	unknown	AAAAVATGKKRKRPHV	rank_017	0.8	B-C	1.0795	B	A,2-9	AAAVATGK	33.246	9.991	13.211
postGMF-runs\2client\WT_analysis\more_scans\NRF1\NRF1_81-96_output	2client	WT	unknown	AAAAVATGKKRKRPHV	rank_025	0.74	C-D	1.41167	D	A,2-9	AAAVATGK	46.421	5.145	9.595		postGMF-runs\1client\WT_analysis\more_scans\NRF1\NRF1_81-96_output	1client	WT	unknown	AAAAVATGKKRKRPHV	rank_017	0.8	B-C	1.0795	B	A,2-9	AAAVATGK	33.246	9.991	13.211
postGMF-runs\2client\WT_analysis\more_scans\NRF1\NRF1_81-96_output	2client	WT	unknown	AAAAVATGKKRKRPHV	rank_024	0.75	C-D	1.37542	D	A,3-10	AAVATGKK	46.529	5.335	9.372		postGMF-runs\1client\WT_analysis\more_scans\NRF1\NRF1_81-96_output	1client	WT	unknown	AAAAVATGKKRKRPHV	rank_019	0.8	B-C	1.097	B	A,2-9	AAAVATGK	32.785	9.617	13.342
postGMF-runs\2client\WT_analysis\more_scans\NRF1\NRF1_81-96_output	2client	WT	unknown	AAAAVATGKKRKRPHV	rank_024	0.75	C-D	1.37542	C	B,3-10	AAVATGKK	46.424	5.299	9.358		postGMF-runs\1client\WT_analysis\more_scans\NRF1\NRF1_81-96_output	1client	WT	unknown	AAAAVATGKKRKRPHV	rank_019	0.8	B-C	1.097	B	A,2-9	AAAVATGK	32.785	9.617	13.342
postGMF-runs\2client\WT_analysis\more_scans\NRF1\NRF1_81-96_output	2client	WT	unknown	AAAAVATGKKRKRPHV	rank_010	0.79	C-D	1.05727	D	B,3-10	AAVATGKK	46.165	6.469	11.166		postGMF-runs\1client\WT_analysis\more_scans\NRF1\NRF1_81-96_output	1client	WT	unknown	AAAAVATGKKRKRPHV	rank_001	0.83	B-C	0.969545	C	A,3-10	AAVATGKK	32.319	8.686	12.468
postGMF-runs\2client\WT_analysis\more_scans\NRF1\NRF1_81-96_output	2client	WT	unknown	AAAAVATGKKRKRPHV	rank_010	0.79	C-D	1.05727	C	A,3-10	AAVATGKK	46.106	6.392	11.169		postGMF-runs\1client\WT_analysis\more_scans\NRF1\NRF1_81-96_output	1client	WT	unknown	AAAAVATGKKRKRPHV	rank_001	0.83	B-C	0.969545	C	A,3-10	AAVATGKK	32.319	8.686	12.468
postGMF-runs\2client\WT_analysis\more_scans\NRF1\NRF1_81-96_output	2client	WT	unknown	AAAAVATGKKRKRPHV	rank_011	0.78	C-D	1.02455	D	A,2-9	AAAVATGK	45.816	6.536	11.244		postGMF-runs\1client\WT_analysis\more_scans\NRF1\NRF1_81-96_output	1client	WT	unknown	AAAAVATGKKRKRPHV	rank_003	0.82	B-C	0.971	B	A,2-9	AAAVATGK	31.464	9.38	13.084
postGMF-runs\2client\WT_analysis\more_scans\NRF1\NRF1_81-96_output	2client	WT	unknown	AAAAVATGKKRKRPHV	rank_011	0.78	C-D	1.02455	C	B,2-9	AAAVATGK	45.664	6.548	11.253		postGMF-runs\1client\WT_analysis\more_scans\NRF1\NRF1_81-96_output	1client	WT	unknown	AAAAVATGKKRKRPHV	rank_003	0.82	B-C	0.971	B	A,2-9	AAAVATGK	31.464	9.38	13.084
postGMF-runs\2client\WT_analysis\more_scans\NRF1\NRF1_81-96_output	2client	WT	unknown	AAAAVATGKKRKRPHV	rank_003	0.79	C-D	0.986818	D	A,3-10	AAVATGKK	45.156	5.95	10.818		postGMF-runs\1client\WT_analysis\more_scans\NRF1\NRF1_81-96_output	1client	WT	unknown	AAAAVATGKKRKRPHV	rank_010	0.81	B-C	0.987	C	A,2-9	AAAVATGK	31.151	9.008	12.96
postGMF-runs\2client\WT_analysis\more_scans\NRF1\NRF1_81-96_output	2client	WT	unknown	AAAAVATGKKRKRPHV	rank_003	0.79	C-D	0.986818	C	B,3-10	AAVATGKK	44.939	5.979	10.925		postGMF-runs\1client\WT_analysis\more_scans\NRF1\NRF1_81-96_output	1client	WT	unknown	AAAAVATGKKRKRPHV	rank_010	0.81	B-C	0.987	C	A,2-9	AAAVATGK	31.151	9.008	12.96
postGMF-runs\2client\WT_analysis\more_scans\NRF1\NRF1_81-96_output	2client	WT	unknown	AAAAVATGKKRKRPHV	rank_022	0.76	C-D	1.36429	D	A,3-10	AAVATGKK	44.958	5.114	9.148		postGMF-runs\1client\WT_analysis\more_scans\NRF1\NRF1_81-96_output	1client	WT	unknown	AAAAVATGKKRKRPHV	rank_013	0.81	B-C	1.02864	C	A,2-9	AAAVATGK	30.48	9.44	13.144
postGMF-runs\2client\WT_analysis\more_scans\NRF1\NRF1_81-96_output	2client	WT	unknown	AAAAVATGKKRKRPHV	rank_022	0.76	C-D	1.36429	C	B,3-10	AAVATGKK	44.445	5.169	9.224		postGMF-runs\1client\WT_analysis\more_scans\NRF1\NRF1_81-96_output	1client	WT	unknown	AAAAVATGKKRKRPHV	rank_013	0.81	B-C	1.02864	C	A,2-9	AAAVATGK	30.48	9.44	13.144
postGMF-runs\2client\WT_analysis\more_scans\NRF1\NRF1_81-96_output	2client	WT	unknown	AAAAVATGKKRKRPHV	rank_012	0.78	C-D	1.01273	C	A,2-9	AAAVATGK	44.952	6.67	11.342		postGMF-runs\1client\WT_analysis\more_scans\NRF1\NRF1_81-96_output	1client	WT	unknown	AAAAVATGKKRKRPHV	rank_004	0.82	B-C	0.970455	B	A,3-10	AAVATGKK	30.325	9.373	13.258
postGMF-runs\2client\WT_analysis\more_scans\NRF1\NRF1_81-96_output	2client	WT	unknown	AAAAVATGKKRKRPHV	rank_012	0.78	C-D	1.01273	D	B,2-9	AAAVATGK	43.686	6.785	11.514		postGMF-runs\1client\WT_analysis\more_scans\NRF1\NRF1_81-96_output	1client	WT	unknown	AAAAVATGKKRKRPHV	rank_004	0.82	B-C	0.970455	B	A,3-10	AAVATGKK	30.325	9.373	13.258
postGMF-runs\2client\WT_analysis\more_scans\NRF1\NRF1_81-96_output	2client	WT	unknown	AAAAVATGKKRKRPHV	rank_015	0.78	C-D	1.0365	C	A,2-9	AAAVATGK	43.831	6.847	11.355		postGMF-runs\1client\WT_analysis\more_scans\NRF1\NRF1_81-96_output	1client	WT	unknown	AAAAVATGKKRKRPHV	rank_007	0.82	B-C	0.97	C	A,2-9	AAAVATGK	29.332	10.018	13.362
postGMF-runs\2client\WT_analysis\more_scans\NRF1\NRF1_81-96_output	2client	WT	unknown	AAAAVATGKKRKRPHV	rank_015	0.78	C-D	1.0365	D	B,2-9	AAAVATGK	43.1	6.909	11.431		postGMF-runs\1client\WT_analysis\more_scans\NRF1\NRF1_81-96_output	1client	WT	unknown	AAAAVATGKKRKRPHV	rank_007	0.82	B-C	0.97	C	A,2-9	AAAVATGK	29.332	10.018	13.362
postGMF-runs\2client\WT_analysis\more_scans\NRF1\NRF1_81-96_output	2client	WT	unknown	AAAAVATGKKRKRPHV	rank_009	0.78	C-D	1.065	C	B,3-10	AAVATGKK	43.62	5.861	11.055		postGMF-runs\1client\WT_analysis\more_scans\NRF1\NRF1_81-96_output	1client	WT	unknown	AAAAVATGKKRKRPHV	rank_011	0.81	B-C	0.9845	B	A,2-9	AAAVATGK	29.072	9.897	13.535
postGMF-runs\2client\WT_analysis\more_scans\NRF1\NRF1_81-96_output	2client	WT	unknown	AAAAVATGKKRKRPHV	rank_009	0.78	C-D	1.065	D	A,3-10	AAVATGKK	43.535	5.84	10.966		postGMF-runs\1client\WT_analysis\more_scans\NRF1\NRF1_81-96_output	1client	WT	unknown	AAAAVATGKKRKRPHV	rank_011	0.81	B-C	0.9845	B	A,2-9	AAAVATGK	29.072	9.897	13.535
postGMF-runs\2client\WT_analysis\more_scans\NRF1\NRF1_81-96_output	2client	WT	unknown	AAAAVATGKKRKRPHV	rank_002	0.79	C-D	0.999545	D	B,3-10	AAVATGKK	43.241	5.845	11.107		postGMF-runs\1client\WT_analysis\more_scans\NRF1\NRF1_81-96_output	1client	WT	unknown	AAAAVATGKKRKRPHV	rank_016	0.8	B-C	1.07364	C	A,2-9	AAAVATGK	28.564	9.694	13.358
postGMF-runs\2client\WT_analysis\more_scans\NRF1\NRF1_81-96_output	2client	WT	unknown	AAAAVATGKKRKRPHV	rank_002	0.79	C-D	0.999545	C	A,3-10	AAVATGKK	43.114	5.898	11.145		postGMF-runs\1client\WT_analysis\more_scans\NRF1\NRF1_81-96_output	1client	WT	unknown	AAAAVATGKKRKRPHV	rank_016	0.8	B-C	1.07364	C	A,2-9	AAAVATGK	28.564	9.694	13.358
postGMF-runs\2client\WT_analysis\more_scans\NRF1\NRF1_81-96_output	2client	WT	unknown	AAAAVATGKKRKRPHV	rank_014	0.78	C-D	1.017	C	A,3-10	AAVATGKK	43.079	6.545	11.085		postGMF-runs\1client\WT_analysis\more_scans\NRF1\NRF1_81-96_output	1client	WT	unknown	AAAAVATGKKRKRPHV	rank_005	0.82	B-C	0.985417	C	A,2-9	AAAVATGK	28.345	10.212	13.493
postGMF-runs\2client\WT_analysis\more_scans\NRF1\NRF1_81-96_output	2client	WT	unknown	AAAAVATGKKRKRPHV	rank_014	0.78	C-D	1.017	D	B,2-9	AAAVATGK	41.389	6.547	11.304		postGMF-runs\1client\WT_analysis\more_scans\NRF1\NRF1_81-96_output	1client	WT	unknown	AAAAVATGKKRKRPHV	rank_005	0.82	B-C	0.985417	C	A,2-9	AAAVATGK	28.345	10.212	13.493
postGMF-runs\2client\WT_analysis\more_scans\NRF1\NRF1_81-96_output	2client	WT	unknown	AAAAVATGKKRKRPHV	rank_008	0.79	C-D	1.04636	C	B,3-10	AAVATGKK	42.804	6.07	10.986		postGMF-runs\1client\WT_analysis\more_scans\NRF1\NRF1_81-96_output	1client	WT	unknown	AAAAVATGKKRKRPHV	rank_009	0.82	B-C	0.983636	C	A,2-9	AAAVATGK	27.959	10.554	13.807
postGMF-runs\2client\WT_analysis\more_scans\NRF1\NRF1_81-96_output	2client	WT	unknown	AAAAVATGKKRKRPHV	rank_008	0.79	C-D	1.04636	D	A,3-10	AAVATGKK	42.405	6.057	11.03		postGMF-runs\1client\WT_analysis\more_scans\NRF1\NRF1_81-96_output	1client	WT	unknown	AAAAVATGKKRKRPHV	rank_009	0.82	B-C	0.983636	C	A,2-9	AAAVATGK	27.959	10.554	13.807
postGMF-runs\2client\WT_analysis\more_scans\NRF1\NRF1_81-96_output	2client	WT	unknown	AAAAVATGKKRKRPHV	rank_017	0.78	C-D	1.1055	D	A,3-10	AAVATGKK	42.021	6.385	11.152		postGMF-runs\1client\WT_analysis\more_scans\NRF1\NRF1_81-96_output	1client	WT	unknown	AAAAVATGKKRKRPHV	rank_020	0.8	B-C	1.09227	C	A,2-9	AAAVATGK	27.63	10.415	13.66
postGMF-runs\2client\WT_analysis\more_scans\NRF1\NRF1_81-96_output	2client	WT	unknown	AAAAVATGKKRKRPHV	rank_017	0.78	C-D	1.1055	C	B,2-9	AAAVATGK	41.742	6.294	11.165		postGMF-runs\1client\WT_analysis\more_scans\NRF1\NRF1_81-96_output	1client	WT	unknown	AAAAVATGKKRKRPHV	rank_020	0.8	B-C	1.09227	C	A,2-9	AAAVATGK	27.63	10.415	13.66
postGMF-runs\2client\WT_analysis\more_scans\NRF1\NRF1_81-96_output	2client	WT	unknown	AAAAVATGKKRKRPHV	rank_016	0.78	C-D	1.01591	C	A,2-9	AAAVATGK	41.479	6.938	11.74		postGMF-runs\1client\WT_analysis\more_scans\NRF1\NRF1_81-96_output	1client	WT	unknown	AAAAVATGKKRKRPHV	rank_008	0.82	B-C	0.9795	B	A,3-10	AAVATGKK	27.469	10.011	13.609
postGMF-runs\2client\WT_analysis\more_scans\NRF1\NRF1_81-96_output	2client	WT	unknown	AAAAVATGKKRKRPHV	rank_016	0.78	C-D	1.01591	D	B,2-9	AAAVATGK	40.57	6.955	11.847		postGMF-runs\1client\WT_analysis\more_scans\NRF1\NRF1_81-96_output	1client	WT	unknown	AAAAVATGKKRKRPHV	rank_008	0.82	B-C	0.9795	B	A,3-10	AAVATGKK	27.469	10.011	13.609
postGMF-runs\2client\WT_analysis\more_scans\NRF1\NRF1_81-96_output	2client	WT	unknown	AAAAVATGKKRKRPHV	rank_018	0.78	C-D	1.07591	D	B,3-10	AAVATGKK	40.62	6.629	11.351		postGMF-runs\1client\WT_analysis\more_scans\NRF1\NRF1_81-96_output	1client	WT	unknown	AAAAVATGKKRKRPHV	rank_006	0.82	B-C	0.979091	B	A,2-9	AAAVATGK	27.074	10.766	14.068
postGMF-runs\2client\WT_analysis\more_scans\NRF1\NRF1_81-96_output	2client	WT	unknown	AAAAVATGKKRKRPHV	rank_018	0.78	C-D	1.07591	C	A,3-10	AAVATGKK	40.285	6.655	11.395		postGMF-runs\1client\WT_analysis\more_scans\NRF1\NRF1_81-96_output	1client	WT	unknown	AAAAVATGKKRKRPHV	rank_006	0.82	B-C	0.979091	B	A,2-9	AAAVATGK	27.074	10.766	14.068
postGMF-runs\2client\WT_analysis\more_scans\NRF1\NRF1_81-96_output	2client	WT	unknown	AAAAVATGKKRKRPHV	rank_021	0.76	C-D	1.138	C	B,1-8	AAAAVATG	35.205	6.956	12.305		postGMF-runs\1client\WT_analysis\more_scans\NRF1\NRF1_81-96_output	1client	WT	unknown	AAAAVATGKKRKRPHV	rank_018	0.8	B-C	1.11045	B	A,1-8	AAAAVATG	26.939	10.785	13.144
postGMF-runs\2client\WT_analysis\more_scans\TbLAP\TbLAP_297-312_output	2client	WT	unknown	AAAIAGFFKTLSLLKP	rank_002	0.79	C-D	0.993636	D	A,4-11	IAGFFKTL	43.158	6.325	11.759		postGMF-runs\1client\WT_analysis\more_scans\TbLAP\TbLAP_297-312_output	1client	WT	unknown	AAAIAGFFKTLSLLKP	rank_001	0.82	B-C	1.02545	C	A,3-10	AIAGFFKT	36.029	8.859	12.563
postGMF-runs\2client\WT_analysis\more_scans\TbLAP\TbLAP_297-312_output	2client	WT	unknown	AAAIAGFFKTLSLLKP	rank_002	0.79	C-D	0.993636	C	B,4-11	IAGFFKTL	43.102	6.226	11.611		postGMF-runs\1client\WT_analysis\more_scans\TbLAP\TbLAP_297-312_output	1client	WT	unknown	AAAIAGFFKTLSLLKP	rank_001	0.82	B-C	1.02545	C	A,3-10	AIAGFFKT	36.029	8.859	12.563
postGMF-runs\2client\WT_analysis\more_scans\TbLAP\TbLAP_297-312_output	2client	WT	unknown	AAAIAGFFKTLSLLKP	rank_001	0.79	C-D	0.994545	D	B,4-11	IAGFFKTL	43.114	6.278	11.373		postGMF-runs\1client\WT_analysis\more_scans\TbLAP\TbLAP_297-312_output	1client	WT	unknown	AAAIAGFFKTLSLLKP	rank_022	0.8	B-C	1.17773	C	A,3-10	AIAGFFKT	35.422	9.73	12.501
postGMF-runs\2client\WT_analysis\more_scans\TbLAP\TbLAP_297-312_output	2client	WT	unknown	AAAIAGFFKTLSLLKP	rank_001	0.79	C-D	0.994545	C	A,4-11	IAGFFKTL	39.566	6.77	11.892		postGMF-runs\1client\WT_analysis\more_scans\TbLAP\TbLAP_297-312_output	1client	WT	unknown	AAAIAGFFKTLSLLKP	rank_022	0.8	B-C	1.17773	C	A,3-10	AIAGFFKT	35.422	9.73	12.501
postGMF-runs\2client\WT_analysis\more_scans\TbLAP\TbLAP_297-312_output	2client	WT	unknown	AAAIAGFFKTLSLLKP	rank_003	0.79	C-D	1.00818	D	A,3-10	AIAGFFKT	42.77	6.28	11.011		postGMF-runs\1client\WT_analysis\more_scans\TbLAP\TbLAP_297-312_output	1client	WT	unknown	AAAIAGFFKTLSLLKP	rank_013	0.82	B-C	1.0235	B	A,3-10	AIAGFFKT	31.886	9.746	13.43
postGMF-runs\2client\WT_analysis\more_scans\TbLAP\TbLAP_297-312_output	2client	WT	unknown	AAAIAGFFKTLSLLKP	rank_003	0.79	C-D	1.00818	C	B,3-10	AIAGFFKT	41.584	6.638	11.463		postGMF-runs\1client\WT_analysis\more_scans\TbLAP\TbLAP_297-312_output	1client	WT	unknown	AAAIAGFFKTLSLLKP	rank_013	0.82	B-C	1.0235	B	A,3-10	AIAGFFKT	31.886	9.746	13.43
postGMF-runs\2client\WT_analysis\more_scans\TbLAP\TbLAP_297-312_output	2client	WT	unknown	AAAIAGFFKTLSLLKP	rank_004	0.79	C-D	1.00455	C	B,4-11	IAGFFKTL	42	6.271	11.32		postGMF-runs\1client\WT_analysis\more_scans\TbLAP\TbLAP_297-312_output	1client	WT	unknown	AAAIAGFFKTLSLLKP	rank_005	0.82	B-C	1.02958	B	A,2-9	AAIAGFFK	31.81	9.448	13.137
postGMF-runs\2client\WT_analysis\more_scans\TbLAP\TbLAP_297-312_output	2client	WT	unknown	AAAIAGFFKTLSLLKP	rank_004	0.79	C-D	1.00455	D	A,4-11	IAGFFKTL	41.153	6.423	11.414		postGMF-runs\1client\WT_analysis\more_scans\TbLAP\TbLAP_297-312_output	1client	WT	unknown	AAAIAGFFKTLSLLKP	rank_005	0.82	B-C	1.02958	B	A,2-9	AAIAGFFK	31.81	9.448	13.137
postGMF-runs\2client\WT_analysis\more_scans\TbLAP\TbLAP_297-312_output	2client	WT	unknown	AAAIAGFFKTLSLLKP	rank_023	0.77	C-D	1.17	D	A,1-8	AAAIAGFF	41.93	6.734	11.156		postGMF-runs\1client\WT_analysis\more_scans\TbLAP\TbLAP_297-312_output	1client	WT	unknown	AAAIAGFFKTLSLLKP	rank_006	0.82	B-C	1.02643	C	A,3-10	AIAGFFKT	30.851	10.078	13.488
postGMF-runs\2client\WT_analysis\more_scans\TbLAP\TbLAP_297-312_output	2client	WT	unknown	AAAIAGFFKTLSLLKP	rank_023	0.77	C-D	1.17	C	B,1-8	AAAIAGFF	38.164	7.338	12.089		postGMF-runs\1client\WT_analysis\more_scans\TbLAP\TbLAP_297-312_output	1client	WT	unknown	AAAIAGFFKTLSLLKP	rank_006	0.82	B-C	1.02643	C	A,3-10	AIAGFFKT	30.851	10.078	13.488
postGMF-runs\2client\WT_analysis\more_scans\TbLAP\TbLAP_297-312_output	2client	WT	unknown	AAAIAGFFKTLSLLKP	rank_024	0.76	C-D	1.18864	D	A,1-8	AAAIAGFF	39.773	6.604	11.241		postGMF-runs\1client\WT_analysis\more_scans\TbLAP\TbLAP_297-312_output	1client	WT	unknown	AAAIAGFFKTLSLLKP	rank_025	0.79	B-C	1.26091	B	A,3-10	AIAGFFKT	30.624	10.072	12.626
postGMF-runs\2client\WT_analysis\more_scans\TbLAP\TbLAP_297-312_output	2client	WT	unknown	AAAIAGFFKTLSLLKP	rank_024	0.76	C-D	1.18864	C	B,2-9	AAIAGFFK	38.82	6.694	11.892		postGMF-runs\1client\WT_analysis\more_scans\TbLAP\TbLAP_297-312_output	1client	WT	unknown	AAAIAGFFKTLSLLKP	rank_025	0.79	B-C	1.26091	B	A,3-10	AIAGFFKT	30.624	10.072	12.626
postGMF-runs\2client\WT_analysis\more_scans\TbLAP\TbLAP_297-312_output	2client	WT	unknown	AAAIAGFFKTLSLLKP	rank_008	0.78	C-D	1.01955	D	B,4-11	IAGFFKTL	39.114	6.995	11.627		postGMF-runs\1client\WT_analysis\more_scans\TbLAP\TbLAP_297-312_output	1client	WT	unknown	AAAIAGFFKTLSLLKP	rank_014	0.81	B-C	1.01955	C	A,3-10	AIAGFFKT	30.624	10.132	14.261
postGMF-runs\2client\WT_analysis\more_scans\TbLAP\TbLAP_297-312_output	2client	WT	unknown	AAAIAGFFKTLSLLKP	rank_008	0.78	C-D	1.01955	C	A,4-11	IAGFFKTL	38.355	7.075	11.877		postGMF-runs\1client\WT_analysis\more_scans\TbLAP\TbLAP_297-312_output	1client	WT	unknown	AAAIAGFFKTLSLLKP	rank_014	0.81	B-C	1.01955	C	A,3-10	AIAGFFKT	30.624	10.132	14.261
postGMF-runs\2client\WT_analysis\more_scans\TbLAP\TbLAP_297-312_output	2client	WT	unknown	AAAIAGFFKTLSLLKP	rank_013	0.78	C-D	1.07591	D	A,3-10	AIAGFFKT	38.704	6.294	11.636		postGMF-runs\1client\WT_analysis\more_scans\TbLAP\TbLAP_297-312_output	1client	WT	unknown	AAAIAGFFKTLSLLKP	rank_018	0.81	B-C	1.00909	C	A,3-10	AIAGFFKT	30.493	10.297	13.601
postGMF-runs\2client\WT_analysis\more_scans\TbLAP\TbLAP_297-312_output	2client	WT	unknown	AAAIAGFFKTLSLLKP	rank_013	0.78	C-D	1.07591	C	B,3-10	AIAGFFKT	38.679	6.297	11.629		postGMF-runs\1client\WT_analysis\more_scans\TbLAP\TbLAP_297-312_output	1client	WT	unknown	AAAIAGFFKTLSLLKP	rank_018	0.81	B-C	1.00909	C	A,3-10	AIAGFFKT	30.493	10.297	13.601
postGMF-runs\2client\WT_analysis\more_scans\TbLAP\TbLAP_297-312_output	2client	WT	unknown	AAAIAGFFKTLSLLKP	rank_015	0.78	C-D	1.07591	C	A,3-10	AIAGFFKT	38.606	6.301	11.552		postGMF-runs\1client\WT_analysis\more_scans\TbLAP\TbLAP_297-312_output	1client	WT	unknown	AAAIAGFFKTLSLLKP	rank_021	0.81	B-C	1.13955	B	A,4-11	IAGFFKTL	30.399	10.039	12.936
postGMF-runs\2client\WT_analysis\more_scans\TbLAP\TbLAP_297-312_output	2client	WT	unknown	AAAIAGFFKTLSLLKP	rank_015	0.78	C-D	1.07591	D	B,3-10	AIAGFFKT	38.035	6.396	11.704		postGMF-runs\1client\WT_analysis\more_scans\TbLAP\TbLAP_297-312_output	1client	WT	unknown	AAAIAGFFKTLSLLKP	rank_021	0.81	B-C	1.13955	B	A,4-11	IAGFFKTL	30.399	10.039	12.936
postGMF-runs\2client\WT_analysis\more_scans\TbLAP\TbLAP_297-312_output	2client	WT	unknown	AAAIAGFFKTLSLLKP	rank_006	0.79	C-D	0.983182	D	A,3-10	AIAGFFKT	38.227	7.348	11.598		postGMF-runs\1client\WT_analysis\more_scans\TbLAP\TbLAP_297-312_output	1client	WT	unknown	AAAIAGFFKTLSLLKP	rank_024	0.79	B-C	1.20864	C	A,4-11	IAGFFKTL	30.369	10.481	13.118
postGMF-runs\2client\WT_analysis\more_scans\TbLAP\TbLAP_297-312_output	2client	WT	unknown	AAAIAGFFKTLSLLKP	rank_006	0.79	C-D	0.983182	C	B,3-10	AIAGFFKT	38.156	7.143	11.36		postGMF-runs\1client\WT_analysis\more_scans\TbLAP\TbLAP_297-312_output	1client	WT	unknown	AAAIAGFFKTLSLLKP	rank_024	0.79	B-C	1.20864	C	A,4-11	IAGFFKTL	30.369	10.481	13.118
postGMF-runs\2client\WT_analysis\more_scans\TbLAP\TbLAP_297-312_output	2client	WT	unknown	AAAIAGFFKTLSLLKP	rank_005	0.79	C-D	1.00182	D	B,3-10	AIAGFFKT	37.432	6.714	12.049		postGMF-runs\1client\WT_analysis\more_scans\TbLAP\TbLAP_297-312_output	1client	WT	unknown	AAAIAGFFKTLSLLKP	rank_010	0.82	B-C	0.998636	C	A,2-9	AAIAGFFK	30.29	9.792	13.025
postGMF-runs\2client\WT_analysis\more_scans\TbLAP\TbLAP_297-312_output	2client	WT	unknown	AAAIAGFFKTLSLLKP	rank_005	0.79	C-D	1.00182	C	A,3-10	AIAGFFKT	36.986	6.783	12.172		postGMF-runs\1client\WT_analysis\more_scans\TbLAP\TbLAP_297-312_output	1client	WT	unknown	AAAIAGFFKTLSLLKP	rank_010	0.82	B-C	0.998636	C	A,2-9	AAIAGFFK	30.29	9.792	13.025
postGMF-runs\2client\WT_analysis\more_scans\TbLAP\TbLAP_297-312_output	2client	WT	unknown	AAAIAGFFKTLSLLKP	rank_007	0.78	C-D	1.00591	C	A,2-9	AAIAGFFK	37.178	6.509	12.185		postGMF-runs\1client\WT_analysis\more_scans\TbLAP\TbLAP_297-312_output	1client	WT	unknown	AAAIAGFFKTLSLLKP	rank_023	0.8	B-C	1.13045	B	A,4-11	IAGFFKTL	29.73	10.018	12.988
postGMF-runs\2client\WT_analysis\more_scans\TbLAP\TbLAP_297-312_output	2client	WT	unknown	AAAIAGFFKTLSLLKP	rank_007	0.78	C-D	1.00591	D	B,2-9	AAIAGFFK	36.537	6.699	12.365		postGMF-runs\1client\WT_analysis\more_scans\TbLAP\TbLAP_297-312_output	1client	WT	unknown	AAAIAGFFKTLSLLKP	rank_023	0.8	B-C	1.13045	B	A,4-11	IAGFFKTL	29.73	10.018	12.988
postGMF-runs\2client\WT_analysis\more_scans\TbLAP\TbLAP_297-312_output	2client	WT	unknown	AAAIAGFFKTLSLLKP	rank_021	0.77	C-D	0.998636	D	A,3-10	AIAGFFKT	35.867	7.726	12.165		postGMF-runs\1client\WT_analysis\more_scans\TbLAP\TbLAP_297-312_output	1client	WT	unknown	AAAIAGFFKTLSLLKP	rank_020	0.81	B-C	1.04	C	A,3-10	AIAGFFKT	29.285	10.682	13.741
postGMF-runs\2client\WT_analysis\more_scans\TbLAP\TbLAP_297-312_output	2client	WT	unknown	AAAIAGFFKTLSLLKP	rank_021	0.77	C-D	0.998636	C	B,3-10	AIAGFFKT	35.697	7.613	12.229		postGMF-runs\1client\WT_analysis\more_scans\TbLAP\TbLAP_297-312_output	1client	WT	unknown	AAAIAGFFKTLSLLKP	rank_020	0.81	B-C	1.04	C	A,3-10	AIAGFFKT	29.285	10.682	13.741
postGMF-runs\2client\WT_analysis\more_scans\TbLAP\TbLAP_297-312_output	2client	WT	unknown	AAAIAGFFKTLSLLKP	rank_019	0.77	C-D	0.993182	C	B,3-10	AIAGFFKT	35.336	7.742	12.697		postGMF-runs\1client\WT_analysis\more_scans\TbLAP\TbLAP_297-312_output	1client	WT	unknown	AAAIAGFFKTLSLLKP	rank_017	0.81	B-C	1.03115	C	A,3-10	AIAGFFKT	29.095	10.858	14.331
postGMF-runs\2client\WT_analysis\more_scans\TbLAP\TbLAP_297-312_output	2client	WT	unknown	AAAIAGFFKTLSLLKP	rank_019	0.77	C-D	0.993182	D	A,3-10	AIAGFFKT	35.009	7.773	12.706		postGMF-runs\1client\WT_analysis\more_scans\TbLAP\TbLAP_297-312_output	1client	WT	unknown	AAAIAGFFKTLSLLKP	rank_017	0.81	B-C	1.03115	C	A,3-10	AIAGFFKT	29.095	10.858	14.331
postGMF-runs\2client\WT_analysis\more_scans\TbLAP\TbLAP_297-312_output	2client	WT	unknown	AAAIAGFFKTLSLLKP	rank_020	0.77	C-D	0.999091	C	B,3-10	AIAGFFKT	35.239	7.348	12.081		postGMF-runs\1client\WT_analysis\more_scans\TbLAP\TbLAP_297-312_output	1client	WT	unknown	AAAIAGFFKTLSLLKP	rank_007	0.82	B-C	0.995	B	A,4-11	IAGFFKTL	28.647	10.853	14.05
postGMF-runs\2client\WT_analysis\more_scans\TbLAP\TbLAP_297-312_output	2client	WT	unknown	AAAIAGFFKTLSLLKP	rank_020	0.77	C-D	0.999091	D	A,3-10	AIAGFFKT	34.524	7.324	12.158		postGMF-runs\1client\WT_analysis\more_scans\TbLAP\TbLAP_297-312_output	1client	WT	unknown	AAAIAGFFKTLSLLKP	rank_007	0.82	B-C	0.995	B	A,4-11	IAGFFKTL	28.647	10.853	14.05
postGMF-runs\2client\WT_analysis\more_scans\TbLAP\TbLAP_297-312_output	2client	WT	unknown	AAAIAGFFKTLSLLKP	rank_014	0.78	C-D	1.00462	D	B,2-9	AAIAGFFK	35.121	7.298	12.48		postGMF-runs\1client\WT_analysis\more_scans\TbLAP\TbLAP_297-312_output	1client	WT	unknown	AAAIAGFFKTLSLLKP	rank_002	0.82	B-C	0.986818	B	A,2-9	AAIAGFFK	28.585	10.502	13.875
postGMF-runs\2client\WT_analysis\more_scans\TbLAP\TbLAP_297-312_output	2client	WT	unknown	AAAIAGFFKTLSLLKP	rank_014	0.78	C-D	1.00462	C	A,2-9	AAIAGFFK	34.899	7.387	12.511		postGMF-runs\1client\WT_analysis\more_scans\TbLAP\TbLAP_297-312_output	1client	WT	unknown	AAAIAGFFKTLSLLKP	rank_002	0.82	B-C	0.986818	B	A,2-9	AAIAGFFK	28.585	10.502	13.875
postGMF-runs\2client\WT_analysis\more_scans\TbLAP\TbLAP_297-312_output	2client	WT	unknown	AAAIAGFFKTLSLLKP	rank_017	0.78	C-D	0.990455	C	B,2-9	AAIAGFFK	35.091	7.277	12.509		postGMF-runs\1client\WT_analysis\more_scans\TbLAP\TbLAP_297-312_output	1client	WT	unknown	AAAIAGFFKTLSLLKP	rank_019	0.81	B-C	1.007	B	A,2-9	AAIAGFFK	28.537	10.36	13.552
postGMF-runs\2client\WT_analysis\more_scans\TbLAP\TbLAP_297-312_output	2client	WT	unknown	AAAIAGFFKTLSLLKP	rank_017	0.78	C-D	0.990455	D	A,2-9	AAIAGFFK	34.684	7.381	12.549		postGMF-runs\1client\WT_analysis\more_scans\TbLAP\TbLAP_297-312_output	1client	WT	unknown	AAAIAGFFKTLSLLKP	rank_019	0.81	B-C	1.007	B	A,2-9	AAIAGFFK	28.537	10.36	13.552
postGMF-runs\2client\WT_analysis\more_scans\TbLAP\TbLAP_297-312_output	2client	WT	unknown	AAAIAGFFKTLSLLKP	rank_009	0.78	C-D	0.959091	D	B,4-11	IAGFFKTL	34.385	7.768	12.437		postGMF-runs\1client\WT_analysis\more_scans\TbLAP\TbLAP_297-312_output	1client	WT	unknown	AAAIAGFFKTLSLLKP	rank_011	0.82	B-C	0.999545	C	A,4-11	IAGFFKTL	28.342	10.813	14.08
postGMF-runs\2client\WT_analysis\more_scans\TbLAP\TbLAP_297-312_output	2client	WT	unknown	AAAIAGFFKTLSLLKP	rank_009	0.78	C-D	0.959091	C	A,4-11	IAGFFKTL	34.265	7.638	12.399		postGMF-runs\1client\WT_analysis\more_scans\TbLAP\TbLAP_297-312_output	1client	WT	unknown	AAAIAGFFKTLSLLKP	rank_011	0.82	B-C	0.999545	C	A,4-11	IAGFFKTL	28.342	10.813	14.08
postGMF-runs\2client\WT_analysis\more_scans\TbLAP\TbLAP_297-312_output	2client	WT	unknown	AAAIAGFFKTLSLLKP	rank_010	0.78	C-D	0.977727	C	A,4-11	IAGFFKTL	34.101	7.295	12.028		postGMF-runs\1client\WT_analysis\more_scans\TbLAP\TbLAP_297-312_output	1client	WT	unknown	AAAIAGFFKTLSLLKP	rank_004	0.82	B-C	0.973	C	A,3-10	AIAGFFKT	28.192	10.647	14.566
postGMF-runs\2client\WT_analysis\more_scans\TbLAP\TbLAP_297-312_output	2client	WT	unknown	AAAIAGFFKTLSLLKP	rank_010	0.78	C-D	0.977727	D	B,3-10	AIAGFFKT	33.487	7.492	12.064		postGMF-runs\1client\WT_analysis\more_scans\TbLAP\TbLAP_297-312_output	1client	WT	unknown	AAAIAGFFKTLSLLKP	rank_004	0.82	B-C	0.973	C	A,3-10	AIAGFFKT	28.192	10.647	14.566
postGMF-runs\2client\WT_analysis\more_scans\TbLAP\TbLAP_297-312_output	2client	WT	unknown	AAAIAGFFKTLSLLKP	rank_012	0.78	C-D	0.953636	D	A,4-11	IAGFFKTL	33.251	8.167	12.713		postGMF-runs\1client\WT_analysis\more_scans\TbLAP\TbLAP_297-312_output	1client	WT	unknown	AAAIAGFFKTLSLLKP	rank_008	0.82	B-C	0.991818	C	A,3-10	AIAGFFKT	28.104	10.715	14.541
postGMF-runs\2client\WT_analysis\more_scans\TbLAP\TbLAP_297-312_output	2client	WT	unknown	AAAIAGFFKTLSLLKP	rank_012	0.78	C-D	0.953636	C	B,4-11	IAGFFKTL	33.185	8.123	12.731		postGMF-runs\1client\WT_analysis\more_scans\TbLAP\TbLAP_297-312_output	1client	WT	unknown	AAAIAGFFKTLSLLKP	rank_008	0.82	B-C	0.991818	C	A,3-10	AIAGFFKT	28.104	10.715	14.541
postGMF-runs\2client\WT_analysis\more_scans\TbLAP\TbLAP_297-312_output	2client	WT	unknown	AAAIAGFFKTLSLLKP	rank_025	0.77	C-D	1.12591	C	B,2-9	AAIAGFFK	33.175	7.526	12.516		postGMF-runs\1client\WT_analysis\more_scans\TbLAP\TbLAP_297-312_output	1client	WT	unknown	AAAIAGFFKTLSLLKP	rank_009	0.82	B-C	0.992727	C	A,4-11	IAGFFKTL	27.738	11.106	15.171
postGMF-runs\2client\WT_analysis\more_scans\TbLAP\TbLAP_297-312_output	2client	WT	unknown	AAAIAGFFKTLSLLKP	rank_025	0.77	C-D	1.12591	D	A,2-9	AAIAGFFK	32.466	7.478	12.23		postGMF-runs\1client\WT_analysis\more_scans\TbLAP\TbLAP_297-312_output	1client	WT	unknown	AAAIAGFFKTLSLLKP	rank_009	0.82	B-C	0.992727	C	A,4-11	IAGFFKTL	27.738	11.106	15.171
postGMF-runs\2client\WT_analysis\more_scans\TbLAP\TbLAP_297-312_output	2client	WT	unknown	AAAIAGFFKTLSLLKP	rank_011	0.78	C-D	0.962273	C	B,4-11	IAGFFKTL	32.971	8.137	12.695		postGMF-runs\1client\WT_analysis\more_scans\TbLAP\TbLAP_297-312_output	1client	WT	unknown	AAAIAGFFKTLSLLKP	rank_003	0.82	B-C	1.01773	B	A,3-10	AIAGFFKT	27.283	10.631	13.835
postGMF-runs\2client\WT_analysis\more_scans\TbLAP\TbLAP_297-312_output	2client	WT	unknown	AAAIAGFFKTLSLLKP	rank_011	0.78	C-D	0.962273	D	A,4-11	IAGFFKTL	32.788	8.13	12.736		postGMF-runs\1client\WT_analysis\more_scans\TbLAP\TbLAP_297-312_output	1client	WT	unknown	AAAIAGFFKTLSLLKP	rank_003	0.82	B-C	1.01773	B	A,3-10	AIAGFFKT	27.283	10.631	13.835
postGMF-runs\2client\WT_analysis\more_scans\TbLAP\TbLAP_297-312_output	2client	WT	unknown	AAAIAGFFKTLSLLKP	rank_018	0.78	C-D	0.995	C	A,3-10	AIAGFFKT	29.98	7.524	12.881		postGMF-runs\1client\WT_analysis\more_scans\TbLAP\TbLAP_297-312_output	1client	WT	unknown	AAAIAGFFKTLSLLKP	rank_012	0.82	B-C	1.02591	C	A,4-11	IAGFFKTL	27.19	10.924	14.056
postGMF-runs\2client\WT_analysis\more_scans\TbLAP\TbLAP_297-312_output	2client	WT	unknown	AAAIAGFFKTLSLLKP	rank_018	0.78	C-D	0.995	D	B,3-10	AIAGFFKT	29.29	7.598	12.945		postGMF-runs\1client\WT_analysis\more_scans\TbLAP\TbLAP_297-312_output	1client	WT	unknown	AAAIAGFFKTLSLLKP	rank_012	0.82	B-C	1.02591	C	A,4-11	IAGFFKTL	27.19	10.924	14.056
postGMF-runs\2client\WT_analysis\more_scans\PAC11\PAC11_329-344_output	2client	WT	unknown	AADNGNIMELSCLDLT	rank_001	0.79	C-D	1.01818	C	B,1-8	AADNGNIM	55.584	7.944	11.673		postGMF-runs\1client\WT_analysis\more_scans\PAC11\PAC11_329-344_output	1client	WT	unknown	AADNGNIMELSCLDLT	rank_007	0.81	B-C	1.1615	B	A,3-10	DNGNIMEL	39.201	9.867	12.273
postGMF-runs\2client\WT_analysis\more_scans\PAC11\PAC11_329-344_output	2client	WT	unknown	AADNGNIMELSCLDLT	rank_001	0.79	C-D	1.01818	D	A,1-8	AADNGNIM	53.965	8.115	11.883		postGMF-runs\1client\WT_analysis\more_scans\PAC11\PAC11_329-344_output	1client	WT	unknown	AADNGNIMELSCLDLT	rank_007	0.81	B-C	1.1615	B	A,3-10	DNGNIMEL	39.201	9.867	12.273
postGMF-runs\2client\WT_analysis\more_scans\PAC11\PAC11_329-344_output	2client	WT	unknown	AADNGNIMELSCLDLT	rank_005	0.76	C-D	1.306	C	A,2-9	ADNGNIME	47.97	6.451	11.174		postGMF-runs\1client\WT_analysis\more_scans\PAC11\PAC11_329-344_output	1client	WT	unknown	AADNGNIMELSCLDLT	rank_008	0.81	B-C	1.1275	B	A,3-10	DNGNIMEL	38.196	9.41	12.84
postGMF-runs\2client\WT_analysis\more_scans\PAC11\PAC11_329-344_output	2client	WT	unknown	AADNGNIMELSCLDLT	rank_005	0.76	C-D	1.306	D	B,2-9	ADNGNIME	47.553	6.711	11.437		postGMF-runs\1client\WT_analysis\more_scans\PAC11\PAC11_329-344_output	1client	WT	unknown	AADNGNIMELSCLDLT	rank_008	0.81	B-C	1.1275	B	A,3-10	DNGNIMEL	38.196	9.41	12.84
postGMF-runs\2client\WT_analysis\more_scans\PAC11\PAC11_329-344_output	2client	WT	unknown	AADNGNIMELSCLDLT	rank_002	0.78	C-D	0.999545	D	B,3-10	DNGNIMEL	46.14	8.298	13.29		postGMF-runs\1client\WT_analysis\more_scans\PAC11\PAC11_329-344_output	1client	WT	unknown	AADNGNIMELSCLDLT	rank_015	0.8	B-C	1.2485	C	A,2-9	ADNGNIME	37.093	8.622	12.602
postGMF-runs\2client\WT_analysis\more_scans\PAC11\PAC11_329-344_output	2client	WT	unknown	AADNGNIMELSCLDLT	rank_002	0.78	C-D	0.999545	C	A,3-10	DNGNIMEL	43.83	8.242	13.352		postGMF-runs\1client\WT_analysis\more_scans\PAC11\PAC11_329-344_output	1client	WT	unknown	AADNGNIMELSCLDLT	rank_015	0.8	B-C	1.2485	C	A,2-9	ADNGNIME	37.093	8.622	12.602
postGMF-runs\2client\WT_analysis\more_scans\PAC11\PAC11_329-344_output	2client	WT	unknown	AADNGNIMELSCLDLT	rank_022	0.73	C-D	1.62846	D	A,3-10	DNGNIMEL	43.961	7.21	12.24		postGMF-runs\1client\WT_analysis\more_scans\PAC11\PAC11_329-344_output	1client	WT	unknown	AADNGNIMELSCLDLT	rank_017	0.78	B-C	1.39773	C	A,4-11	NGNIMELS	36.372	9.915	14.472
postGMF-runs\2client\WT_analysis\more_scans\PAC11\PAC11_329-344_output	2client	WT	unknown	AADNGNIMELSCLDLT	rank_022	0.73	C-D	1.62846	C	B,4-11	NGNIMELS	42.949	7.227	13.07		postGMF-runs\1client\WT_analysis\more_scans\PAC11\PAC11_329-344_output	1client	WT	unknown	AADNGNIMELSCLDLT	rank_017	0.78	B-C	1.39773	C	A,4-11	NGNIMELS	36.372	9.915	14.472
postGMF-runs\2client\WT_analysis\more_scans\PAC11\PAC11_329-344_output	2client	WT	unknown	AADNGNIMELSCLDLT	rank_017	0.74	C-D	1.3575	D	B,2-9	ADNGNIME	43.781	6.969	11.71		postGMF-runs\1client\WT_analysis\more_scans\PAC11\PAC11_329-344_output	1client	WT	unknown	AADNGNIMELSCLDLT	rank_014	0.8	B-C	1.196	B	A,4-11	NGNIMELS	33.624	10.419	14.314
postGMF-runs\2client\WT_analysis\more_scans\PAC11\PAC11_329-344_output	2client	WT	unknown	AADNGNIMELSCLDLT	rank_017	0.74	C-D	1.3575	C	A,2-9	ADNGNIME	42.316	7.283	12.16		postGMF-runs\1client\WT_analysis\more_scans\PAC11\PAC11_329-344_output	1client	WT	unknown	AADNGNIMELSCLDLT	rank_014	0.8	B-C	1.196	B	A,4-11	NGNIMELS	33.624	10.419	14.314
postGMF-runs\2client\WT_analysis\more_scans\PAC11\PAC11_329-344_output	2client	WT	unknown	AADNGNIMELSCLDLT	rank_010	0.75	C-D	1.3255	D	B,3-10	DNGNIMEL	42.815	7.96	12.965		postGMF-runs\1client\WT_analysis\more_scans\PAC11\PAC11_329-344_output	1client	WT	unknown	AADNGNIMELSCLDLT	rank_012	0.8	B-C	1.187	B	A,3-10	DNGNIMEL	32.915	10.182	13.829
postGMF-runs\2client\WT_analysis\more_scans\PAC11\PAC11_329-344_output	2client	WT	unknown	AADNGNIMELSCLDLT	rank_010	0.75	C-D	1.3255	C	A,3-10	DNGNIMEL	42.569	8.123	13.081		postGMF-runs\1client\WT_analysis\more_scans\PAC11\PAC11_329-344_output	1client	WT	unknown	AADNGNIMELSCLDLT	rank_012	0.8	B-C	1.187	B	A,3-10	DNGNIMEL	32.915	10.182	13.829
postGMF-runs\2client\WT_analysis\more_scans\PAC11\PAC11_329-344_output	2client	WT	unknown	AADNGNIMELSCLDLT	rank_018	0.74	C-D	1.36792	C	B,2-9	ADNGNIME	41.629	7.154	11.563		postGMF-runs\1client\WT_analysis\more_scans\PAC11\PAC11_329-344_output	1client	WT	unknown	AADNGNIMELSCLDLT	rank_020	0.77	B-C	1.46227	B	A,4-11	NGNIMELS	31.69	9.932	15.568
postGMF-runs\2client\WT_analysis\more_scans\PAC11\PAC11_329-344_output	2client	WT	unknown	AADNGNIMELSCLDLT	rank_018	0.74	C-D	1.36792	D	A,2-9	ADNGNIME	41.569	7.127	11.535		postGMF-runs\1client\WT_analysis\more_scans\PAC11\PAC11_329-344_output	1client	WT	unknown	AADNGNIMELSCLDLT	rank_020	0.77	B-C	1.46227	B	A,4-11	NGNIMELS	31.69	9.932	15.568
postGMF-runs\2client\WT_analysis\more_scans\PAC11\PAC11_329-344_output	2client	WT	unknown	AADNGNIMELSCLDLT	rank_023	0.72	C-D	1.6725	C	A,3-10	DNGNIMEL	41.614	7.022	12.396		postGMF-runs\1client\WT_analysis\more_scans\PAC11\PAC11_329-344_output	1client	WT	unknown	AADNGNIMELSCLDLT	rank_025	0.75	B-C	1.56393	C	A,4-11	NGNIMELS	31.611	10.079	14.841
postGMF-runs\2client\WT_analysis\more_scans\PAC11\PAC11_329-344_output	2client	WT	unknown	AADNGNIMELSCLDLT	rank_023	0.72	C-D	1.6725	D	B,3-10	DNGNIMEL	40.836	7.077	12.588		postGMF-runs\1client\WT_analysis\more_scans\PAC11\PAC11_329-344_output	1client	WT	unknown	AADNGNIMELSCLDLT	rank_025	0.75	B-C	1.56393	C	A,4-11	NGNIMELS	31.611	10.079	14.841
postGMF-runs\2client\WT_analysis\more_scans\PAC11\PAC11_329-344_output	2client	WT	unknown	AADNGNIMELSCLDLT	rank_020	0.73	C-D	1.52038	D	A,4-11	NGNIMELS	39.686	8.093	14.271		postGMF-runs\1client\WT_analysis\more_scans\PAC11\PAC11_329-344_output	1client	WT	unknown	AADNGNIMELSCLDLT	rank_024	0.76	B-C	1.48818	B	A,4-11	NGNIMELS	31.593	9.684	15.027
postGMF-runs\2client\WT_analysis\more_scans\PAC11\PAC11_329-344_output	2client	WT	unknown	AADNGNIMELSCLDLT	rank_020	0.73	C-D	1.52038	C	B,4-11	NGNIMELS	39.486	7.997	14.143		postGMF-runs\1client\WT_analysis\more_scans\PAC11\PAC11_329-344_output	1client	WT	unknown	AADNGNIMELSCLDLT	rank_024	0.76	B-C	1.48818	B	A,4-11	NGNIMELS	31.593	9.684	15.027
postGMF-runs\2client\WT_analysis\more_scans\PAC11\PAC11_329-344_output	2client	WT	unknown	AADNGNIMELSCLDLT	rank_007	0.76	C-D	1.31	D	A,3-10	DNGNIMEL	39.411	6.257	11.175		postGMF-runs\1client\WT_analysis\more_scans\PAC11\PAC11_329-344_output	1client	WT	unknown	AADNGNIMELSCLDLT	rank_021	0.77	B-C	1.41955	B	A,4-11	NGNIMELS	31.446	10.402	15.4
postGMF-runs\2client\WT_analysis\more_scans\PAC11\PAC11_329-344_output	2client	WT	unknown	AADNGNIMELSCLDLT	rank_007	0.76	C-D	1.31	C	B,3-10	DNGNIMEL	38.499	6.324	11.21		postGMF-runs\1client\WT_analysis\more_scans\PAC11\PAC11_329-344_output	1client	WT	unknown	AADNGNIMELSCLDLT	rank_021	0.77	B-C	1.41955	B	A,4-11	NGNIMELS	31.446	10.402	15.4
postGMF-runs\2client\WT_analysis\more_scans\PAC11\PAC11_329-344_output	2client	WT	unknown	AADNGNIMELSCLDLT	rank_021	0.73	C-D	1.38375	C	A,3-10	DNGNIMEL	39.159	8.122	13.219		postGMF-runs\1client\WT_analysis\more_scans\PAC11\PAC11_329-344_output	1client	WT	unknown	AADNGNIMELSCLDLT	rank_018	0.78	B-C	1.368	B	A,3-10	DNGNIMEL	31.36	11.037	14.381
postGMF-runs\2client\WT_analysis\more_scans\PAC11\PAC11_329-344_output	2client	WT	unknown	AADNGNIMELSCLDLT	rank_021	0.73	C-D	1.38375	D	B,3-10	DNGNIMEL	39.013	8.146	13.216		postGMF-runs\1client\WT_analysis\more_scans\PAC11\PAC11_329-344_output	1client	WT	unknown	AADNGNIMELSCLDLT	rank_018	0.78	B-C	1.368	B	A,3-10	DNGNIMEL	31.36	11.037	14.381
postGMF-runs\2client\WT_analysis\more_scans\PAC11\PAC11_329-344_output	2client	WT	unknown	AADNGNIMELSCLDLT	rank_009	0.75	C-D	1.34	C	B,3-10	DNGNIMEL	38.682	6.341	11.384		postGMF-runs\1client\WT_analysis\more_scans\PAC11\PAC11_329-344_output	1client	WT	unknown	AADNGNIMELSCLDLT	rank_006	0.81	B-C	1.10455	B	A,4-11	NGNIMELS	30.264	10.595	14.573
postGMF-runs\2client\WT_analysis\more_scans\PAC11\PAC11_329-344_output	2client	WT	unknown	AADNGNIMELSCLDLT	rank_009	0.75	C-D	1.34	D	A,3-10	DNGNIMEL	37.598	6.563	11.524		postGMF-runs\1client\WT_analysis\more_scans\PAC11\PAC11_329-344_output	1client	WT	unknown	AADNGNIMELSCLDLT	rank_006	0.81	B-C	1.10455	B	A,4-11	NGNIMELS	30.264	10.595	14.573
postGMF-runs\2client\WT_analysis\more_scans\PAC11\PAC11_329-344_output	2client	WT	unknown	AADNGNIMELSCLDLT	rank_025	0.7	C-D	1.94	C	B,3-10	DNGNIMEL	38.316	7.101	13.083		postGMF-runs\1client\WT_analysis\more_scans\PAC11\PAC11_329-344_output	1client	WT	unknown	AADNGNIMELSCLDLT	rank_019	0.77	B-C	1.3245	C	A,3-10	DNGNIMEL	28.867	10.899	15.175
postGMF-runs\2client\WT_analysis\more_scans\PAC11\PAC11_329-344_output	2client	WT	unknown	AADNGNIMELSCLDLT	rank_025	0.7	C-D	1.94	D	A,3-10	DNGNIMEL	37.631	7.101	12.99		postGMF-runs\1client\WT_analysis\more_scans\PAC11\PAC11_329-344_output	1client	WT	unknown	AADNGNIMELSCLDLT	rank_019	0.77	B-C	1.3245	C	A,3-10	DNGNIMEL	28.867	10.899	15.175
postGMF-runs\2client\WT_analysis\more_scans\PAC11\PAC11_329-344_output	2client	WT	unknown	AADNGNIMELSCLDLT	rank_024	0.71	C-D	1.84625	C	B,3-10	DNGNIMEL	38.133	7.01	12.784		postGMF-runs\1client\WT_analysis\more_scans\PAC11\PAC11_329-344_output	1client	WT	unknown	AADNGNIMELSCLDLT	rank_009	0.8	B-C	1.04682	B	A,3-10	DNGNIMEL	28.721	11.612	15.479
postGMF-runs\2client\WT_analysis\more_scans\PAC11\PAC11_329-344_output	2client	WT	unknown	AADNGNIMELSCLDLT	rank_024	0.71	C-D	1.84625	D	A,3-10	DNGNIMEL	37.945	7.028	12.759		postGMF-runs\1client\WT_analysis\more_scans\PAC11\PAC11_329-344_output	1client	WT	unknown	AADNGNIMELSCLDLT	rank_009	0.8	B-C	1.04682	B	A,3-10	DNGNIMEL	28.721	11.612	15.479
postGMF-runs\2client\WT_analysis\more_scans\PAC11\PAC11_329-344_output	2client	WT	unknown	AADNGNIMELSCLDLT	rank_003	0.78	C-D	1.02136	D	B,3-10	DNGNIMEL	37.575	7.829	13.374		postGMF-runs\1client\WT_analysis\more_scans\PAC11\PAC11_329-344_output	1client	WT	unknown	AADNGNIMELSCLDLT	rank_016	0.78	B-C	1.227	C	A,2-9	ADNGNIME	28.585	10.645	15.103
postGMF-runs\2client\WT_analysis\more_scans\PAC11\PAC11_329-344_output	2client	WT	unknown	AADNGNIMELSCLDLT	rank_003	0.78	C-D	1.02136	C	A,3-10	DNGNIMEL	37.388	7.784	13.369		postGMF-runs\1client\WT_analysis\more_scans\PAC11\PAC11_329-344_output	1client	WT	unknown	AADNGNIMELSCLDLT	rank_016	0.78	B-C	1.227	C	A,2-9	ADNGNIME	28.585	10.645	15.103
postGMF-runs\2client\WT_analysis\more_scans\PAC11\PAC11_329-344_output	2client	WT	unknown	AADNGNIMELSCLDLT	rank_014	0.75	C-D	1.34	C	B,3-10	DNGNIMEL	36.995	7.436	12.645		postGMF-runs\1client\WT_analysis\more_scans\PAC11\PAC11_329-344_output	1client	WT	unknown	AADNGNIMELSCLDLT	rank_002	0.82	B-C	1.00318	B	A,3-10	DNGNIMEL	28.536	11.28	15.306
postGMF-runs\2client\WT_analysis\more_scans\PAC11\PAC11_329-344_output	2client	WT	unknown	AADNGNIMELSCLDLT	rank_014	0.75	C-D	1.34	D	A,3-10	DNGNIMEL	36.88	7.497	12.714		postGMF-runs\1client\WT_analysis\more_scans\PAC11\PAC11_329-344_output	1client	WT	unknown	AADNGNIMELSCLDLT	rank_002	0.82	B-C	1.00318	B	A,3-10	DNGNIMEL	28.536	11.28	15.306
postGMF-runs\2client\WT_analysis\more_scans\PAC11\PAC11_329-344_output	2client	WT	unknown	AADNGNIMELSCLDLT	rank_015	0.75	C-D	1.29591	C	B,3-10	DNGNIMEL	36.466	7.496	13.175		postGMF-runs\1client\WT_analysis\more_scans\PAC11\PAC11_329-344_output	1client	WT	unknown	AADNGNIMELSCLDLT	rank_001	0.82	B-C	1.04375	C	A,4-11	NGNIMELS	28.196	10.562	14.907
postGMF-runs\2client\WT_analysis\more_scans\PAC11\PAC11_329-344_output	2client	WT	unknown	AADNGNIMELSCLDLT	rank_015	0.75	C-D	1.29591	D	A,3-10	DNGNIMEL	35.135	7.701	13.382		postGMF-runs\1client\WT_analysis\more_scans\PAC11\PAC11_329-344_output	1client	WT	unknown	AADNGNIMELSCLDLT	rank_001	0.82	B-C	1.04375	C	A,4-11	NGNIMELS	28.196	10.562	14.907
postGMF-runs\2client\WT_analysis\more_scans\PAC11\PAC11_329-344_output	2client	WT	unknown	AADNGNIMELSCLDLT	rank_008	0.76	C-D	1.20045	C	A,1-8	AADNGNIM	34.406	8.051	12.865		postGMF-runs\1client\WT_analysis\more_scans\PAC11\PAC11_329-344_output	1client	WT	unknown	AADNGNIMELSCLDLT	rank_010	0.8	B-C	1.09409	C	A,3-10	DNGNIMEL	28.106	11.635	15.18
postGMF-runs\2client\WT_analysis\more_scans\PAC11\PAC11_329-344_output	2client	WT	unknown	AADNGNIMELSCLDLT	rank_008	0.76	C-D	1.20045	D	B,1-8	AADNGNIM	33.426	8.416	12.894		postGMF-runs\1client\WT_analysis\more_scans\PAC11\PAC11_329-344_output	1client	WT	unknown	AADNGNIMELSCLDLT	rank_010	0.8	B-C	1.09409	C	A,3-10	DNGNIMEL	28.106	11.635	15.18
postGMF-runs\2client\WT_analysis\more_scans\PAC11\PAC11_329-344_output	2client	WT	unknown	AADNGNIMELSCLDLT	rank_012	0.75	C-D	1.35	D	A,3-10	DNGNIMEL	33.629	7.535	12.862		postGMF-runs\1client\WT_analysis\more_scans\PAC11\PAC11_329-344_output	1client	WT	unknown	AADNGNIMELSCLDLT	rank_003	0.81	B-C	0.998182	B	A,3-10	DNGNIMEL	28.092	10.995	15.738
postGMF-runs\2client\WT_analysis\more_scans\PAC11\PAC11_329-344_output	2client	WT	unknown	AADNGNIMELSCLDLT	rank_011	0.75	C-D	1.24462	C	B,2-9	ADNGNIME	33.5	7.982	14.04		postGMF-runs\1client\WT_analysis\more_scans\PAC11\PAC11_329-344_output	1client	WT	unknown	AADNGNIMELSCLDLT	rank_022	0.77	B-C	1.436	C	A,2-9	ADNGNIME	27.961	11.207	15.278
postGMF-runs\2client\WT_analysis\more_scans\PAC11\PAC11_329-344_output	2client	WT	unknown	AADNGNIMELSCLDLT	rank_011	0.75	C-D	1.24462	D	A,2-9	ADNGNIME	33.153	7.977	14.069		postGMF-runs\1client\WT_analysis\more_scans\PAC11\PAC11_329-344_output	1client	WT	unknown	AADNGNIMELSCLDLT	rank_022	0.77	B-C	1.436	C	A,2-9	ADNGNIME	27.961	11.207	15.278
postGMF-runs\2client\WT_analysis\more_scans\PAC11\PAC11_329-344_output	2client	WT	unknown	AADNGNIMELSCLDLT	rank_004	0.77	C-D	1.0125	C	A,3-10	DNGNIMEL	32.819	7.944	14.1		postGMF-runs\1client\WT_analysis\more_scans\PAC11\PAC11_329-344_output	1client	WT	unknown	AADNGNIMELSCLDLT	rank_004	0.81	B-C	1.015	B	A,3-10	DNGNIMEL	27.215	11.771	15.926
postGMF-runs\2client\WT_analysis\more_scans\PAC11\PAC11_329-344_output	2client	WT	unknown	AADNGNIMELSCLDLT	rank_004	0.77	C-D	1.0125	D	B,3-10	DNGNIMEL	32.788	7.907	14.027		postGMF-runs\1client\WT_analysis\more_scans\PAC11\PAC11_329-344_output	1client	WT	unknown	AADNGNIMELSCLDLT	rank_004	0.81	B-C	1.015	B	A,3-10	DNGNIMEL	27.215	11.771	15.926
postGMF-runs\2client\WT_analysis\more_scans\PAC11\PAC11_329-344_output	2client	WT	unknown	AADNGNIMELSCLDLT	rank_006	0.77	C-D	1.03885	D	A,3-10	DNGNIMEL	30.379	8.278	14.198		postGMF-runs\1client\WT_analysis\more_scans\PAC11\PAC11_329-344_output	1client	WT	unknown	AADNGNIMELSCLDLT	rank_005	0.81	B-C	1.01864	B	A,3-10	DNGNIMEL	27.005	11.363	15.73
postGMF-runs\2client\WT_analysis\more_scans\PAC11\PAC11_329-344_output	2client	WT	unknown	AADNGNIMELSCLDLT	rank_006	0.77	C-D	1.03885	C	B,3-10	DNGNIMEL	29.828	8.383	14.144		postGMF-runs\1client\WT_analysis\more_scans\PAC11\PAC11_329-344_output	1client	WT	unknown	AADNGNIMELSCLDLT	rank_005	0.81	B-C	1.01864	B	A,3-10	DNGNIMEL	27.005	11.363	15.73
postGMF-runs\2client\WT_analysis\more_scans\AMBRA1\AMBRA1_905-920_output	2client	WT	unknown	AAFIPSSQRGFPDEGI	rank_001	0.89	C-D	0.911154	D	A,2-9	AFIPSSQR	89.739	1.828	3.467		postGMF-runs\1client\WT_analysis\more_scans\AMBRA1\AMBRA1_905-920_output	1client	WT	unknown	AAFIPSSQRGFPDEGI	rank_001	0.89	B-C	0.925	C	A,3-10	FIPSSQRG	83.438	2.852	4.995
postGMF-runs\2client\WT_analysis\more_scans\AMBRA1\AMBRA1_905-920_output	2client	WT	unknown	AAFIPSSQRGFPDEGI	rank_001	0.89	C-D	0.911154	C	B,2-9	AFIPSSQR	89.562	1.889	3.566		postGMF-runs\1client\WT_analysis\more_scans\AMBRA1\AMBRA1_905-920_output	1client	WT	unknown	AAFIPSSQRGFPDEGI	rank_001	0.89	B-C	0.925	C	A,3-10	FIPSSQRG	83.438	2.852	4.995
postGMF-runs\2client\WT_analysis\more_scans\AMBRA1\AMBRA1_905-920_output	2client	WT	unknown	AAFIPSSQRGFPDEGI	rank_002	0.89	C-D	0.927308	D	B,2-9	AFIPSSQR	88.678	2.236	4.135		postGMF-runs\1client\WT_analysis\more_scans\AMBRA1\AMBRA1_905-920_output	1client	WT	unknown	AAFIPSSQRGFPDEGI	rank_002	0.88	B-C	0.920833	B	A,3-10	FIPSSQRG	72.762	6.288	8.343
postGMF-runs\2client\WT_analysis\more_scans\AMBRA1\AMBRA1_905-920_output	2client	WT	unknown	AAFIPSSQRGFPDEGI	rank_002	0.89	C-D	0.927308	C	A,2-9	AFIPSSQR	88.555	2.256	4.157		postGMF-runs\1client\WT_analysis\more_scans\AMBRA1\AMBRA1_905-920_output	1client	WT	unknown	AAFIPSSQRGFPDEGI	rank_002	0.88	B-C	0.920833	B	A,3-10	FIPSSQRG	72.762	6.288	8.343
postGMF-runs\2client\WT_analysis\more_scans\AMBRA1\AMBRA1_905-920_output	2client	WT	unknown	AAFIPSSQRGFPDEGI	rank_004	0.88	C-D	0.921538	C	A,2-9	AFIPSSQR	87.065	2.287	4.3		postGMF-runs\1client\WT_analysis\more_scans\AMBRA1\AMBRA1_905-920_output	1client	WT	unknown	AAFIPSSQRGFPDEGI	rank_003	0.84	B-C	0.930455	B	A,9-16	RGFPDEGI	47.464	12.289	14.108
postGMF-runs\2client\WT_analysis\more_scans\AMBRA1\AMBRA1_905-920_output	2client	WT	unknown	AAFIPSSQRGFPDEGI	rank_004	0.88	C-D	0.921538	D	B,2-9	AFIPSSQR	86.835	2.36	4.369		postGMF-runs\1client\WT_analysis\more_scans\AMBRA1\AMBRA1_905-920_output	1client	WT	unknown	AAFIPSSQRGFPDEGI	rank_003	0.84	B-C	0.930455	B	A,9-16	RGFPDEGI	47.464	12.289	14.108
postGMF-runs\2client\WT_analysis\more_scans\AMBRA1\AMBRA1_905-920_output	2client	WT	unknown	AAFIPSSQRGFPDEGI	rank_005	0.88	C-D	0.933846	C	B,2-9	AFIPSSQR	84.814	2.809	5.027		postGMF-runs\1client\WT_analysis\more_scans\AMBRA1\AMBRA1_905-920_output	1client	WT	unknown	AAFIPSSQRGFPDEGI	rank_021	0.82	B-C	0.956538	B	A,6-13	SSQRGFPD	34.019	12.949	16.003
postGMF-runs\2client\WT_analysis\more_scans\AMBRA1\AMBRA1_905-920_output	2client	WT	unknown	AAFIPSSQRGFPDEGI	rank_005	0.88	C-D	0.933846	D	A,2-9	AFIPSSQR	84.774	2.808	4.972		postGMF-runs\1client\WT_analysis\more_scans\AMBRA1\AMBRA1_905-920_output	1client	WT	unknown	AAFIPSSQRGFPDEGI	rank_021	0.82	B-C	0.956538	B	A,6-13	SSQRGFPD	34.019	12.949	16.003
postGMF-runs\2client\WT_analysis\more_scans\AMBRA1\AMBRA1_905-920_output	2client	WT	unknown	AAFIPSSQRGFPDEGI	rank_003	0.88	C-D	0.923077	C	A,2-9	AFIPSSQR	84.619	2.759	5.157		postGMF-runs\1client\WT_analysis\more_scans\AMBRA1\AMBRA1_905-920_output	1client	WT	unknown	AAFIPSSQRGFPDEGI	rank_022	0.82	B-C	0.950909	B	A,1-8	AAFIPSSQ	29.912	10.909	14.178
postGMF-runs\2client\WT_analysis\more_scans\AMBRA1\AMBRA1_905-920_output	2client	WT	unknown	AAFIPSSQRGFPDEGI	rank_003	0.88	C-D	0.923077	D	B,2-9	AFIPSSQR	83.57	2.82	5.24		postGMF-runs\1client\WT_analysis\more_scans\AMBRA1\AMBRA1_905-920_output	1client	WT	unknown	AAFIPSSQRGFPDEGI	rank_022	0.82	B-C	0.950909	B	A,1-8	AAFIPSSQ	29.912	10.909	14.178
postGMF-runs\2client\WT_analysis\more_scans\AMBRA1\AMBRA1_905-920_output	2client	WT	unknown	AAFIPSSQRGFPDEGI	rank_006	0.87	C-D	0.95	C	A,2-9	AFIPSSQR	84.186	2.59	4.669		postGMF-runs\1client\WT_analysis\more_scans\AMBRA1\AMBRA1_905-920_output	1client	WT	unknown	AAFIPSSQRGFPDEGI	rank_020	0.82	B-C	0.947083	B	A,2-9	AFIPSSQR	29.887	11.755	15.443
postGMF-runs\2client\WT_analysis\more_scans\AMBRA1\AMBRA1_905-920_output	2client	WT	unknown	AAFIPSSQRGFPDEGI	rank_006	0.87	C-D	0.95	D	B,4-11	IPSSQRGF	77.344	3.089	6.485		postGMF-runs\1client\WT_analysis\more_scans\AMBRA1\AMBRA1_905-920_output	1client	WT	unknown	AAFIPSSQRGFPDEGI	rank_020	0.82	B-C	0.947083	B	A,2-9	AFIPSSQR	29.887	11.755	15.443
postGMF-runs\2client\WT_analysis\more_scans\AMBRA1\AMBRA1_905-920_output	2client	WT	unknown	AAFIPSSQRGFPDEGI	rank_007	0.87	C-D	0.939231	D	B,4-11	IPSSQRGF	79.433	3.23	6.458		postGMF-runs\1client\WT_analysis\more_scans\AMBRA1\AMBRA1_905-920_output	1client	WT	unknown	AAFIPSSQRGFPDEGI	rank_020	0.82	B-C	0.947083	C	A,9-16	RGFPDEGI	24.681	15.138	19.942
postGMF-runs\2client\WT_analysis\more_scans\AMBRA1\AMBRA1_905-920_output	2client	WT	unknown	AAFIPSSQRGFPDEGI	rank_007	0.87	C-D	0.939231	C	A,4-11	IPSSQRGF	79.394	3.274	6.449		postGMF-runs\1client\WT_analysis\more_scans\AMBRA1\AMBRA1_905-920_output	1client	WT	unknown	AAFIPSSQRGFPDEGI	rank_020	0.82	B-C	0.947083	C	A,9-16	RGFPDEGI	24.681	15.138	19.942
postGMF-runs\2client\WT_analysis\more_scans\AMBRA1\AMBRA1_905-920_output	2client	WT	unknown	AAFIPSSQRGFPDEGI	rank_008	0.87	C-D	0.942308	C	A,4-11	IPSSQRGF	78.774	3.282	6.672		postGMF-runs\1client\WT_analysis\more_scans\AMBRA1\AMBRA1_905-920_output	1client	WT	unknown	AAFIPSSQRGFPDEGI	rank_023	0.82	B-C	0.956818	B	A,1-8	AAFIPSSQ	28.432	11.556	14.705
postGMF-runs\2client\WT_analysis\more_scans\AMBRA1\AMBRA1_905-920_output	2client	WT	unknown	AAFIPSSQRGFPDEGI	rank_008	0.87	C-D	0.942308	D	B,4-11	IPSSQRGF	78.394	3.499	6.853		postGMF-runs\1client\WT_analysis\more_scans\AMBRA1\AMBRA1_905-920_output	1client	WT	unknown	AAFIPSSQRGFPDEGI	rank_023	0.82	B-C	0.956818	B	A,1-8	AAFIPSSQ	28.432	11.556	14.705
postGMF-runs\2client\WT_analysis\more_scans\AMBRA1\AMBRA1_905-920_output	2client	WT	unknown	AAFIPSSQRGFPDEGI	rank_010	0.86	C-D	0.932692	C	B,4-11	IPSSQRGF	76.539	4.22	7.657		postGMF-runs\1client\WT_analysis\more_scans\AMBRA1\AMBRA1_905-920_output	1client	WT	unknown	AAFIPSSQRGFPDEGI	rank_006	0.83	B-C	0.941667	B	A,1-8	AAFIPSSQ	27.729	11.529	14.455
postGMF-runs\2client\WT_analysis\more_scans\AMBRA1\AMBRA1_905-920_output	2client	WT	unknown	AAFIPSSQRGFPDEGI	rank_010	0.86	C-D	0.932692	D	A,4-11	IPSSQRGF	76.214	4.367	7.808		postGMF-runs\1client\WT_analysis\more_scans\AMBRA1\AMBRA1_905-920_output	1client	WT	unknown	AAFIPSSQRGFPDEGI	rank_006	0.83	B-C	0.941667	B	A,1-8	AAFIPSSQ	27.729	11.529	14.455
postGMF-runs\2client\WT_analysis\more_scans\AMBRA1\AMBRA1_905-920_output	2client	WT	unknown	AAFIPSSQRGFPDEGI	rank_009	0.86	C-D	0.942692	D	B,4-11	IPSSQRGF	75.64	3.647	7.442		postGMF-runs\1client\WT_analysis\more_scans\AMBRA1\AMBRA1_905-920_output	1client	WT	unknown	AAFIPSSQRGFPDEGI	rank_012	0.83	B-C	0.92875	B	A,3-10	FIPSSQRG	27.082	12.335	16.906
postGMF-runs\2client\WT_analysis\more_scans\AMBRA1\AMBRA1_905-920_output	2client	WT	unknown	AAFIPSSQRGFPDEGI	rank_009	0.86	C-D	0.942692	C	A,4-11	IPSSQRGF	75.53	3.82	7.57		postGMF-runs\1client\WT_analysis\more_scans\AMBRA1\AMBRA1_905-920_output	1client	WT	unknown	AAFIPSSQRGFPDEGI	rank_012	0.83	B-C	0.92875	B	A,3-10	FIPSSQRG	27.082	12.335	16.906
postGMF-runs\2client\WT_analysis\more_scans\AMBRA1\AMBRA1_905-920_output	2client	WT	unknown	AAFIPSSQRGFPDEGI	rank_011	0.85	C-D	0.94	D	A,4-11	IPSSQRGF	75.514	4.402	7.89		postGMF-runs\1client\WT_analysis\more_scans\AMBRA1\AMBRA1_905-920_output	1client	WT	unknown	AAFIPSSQRGFPDEGI	rank_013	0.82	B-C	0.962308	B	A,2-9	AFIPSSQR	26.761	11.03	15.307
postGMF-runs\2client\WT_analysis\more_scans\AMBRA1\AMBRA1_905-920_output	2client	WT	unknown	AAFIPSSQRGFPDEGI	rank_011	0.85	C-D	0.94	C	B,4-11	IPSSQRGF	75.052	4.539	8.067		postGMF-runs\1client\WT_analysis\more_scans\AMBRA1\AMBRA1_905-920_output	1client	WT	unknown	AAFIPSSQRGFPDEGI	rank_013	0.82	B-C	0.962308	B	A,2-9	AFIPSSQR	26.761	11.03	15.307
postGMF-runs\2client\WT_analysis\more_scans\AMBRA1\AMBRA1_905-920_output	2client	WT	unknown	AAFIPSSQRGFPDEGI	rank_012	0.85	C-D	0.931154	D	B,3-10	FIPSSQRG	73.055	4.979	7.922		postGMF-runs\1client\WT_analysis\more_scans\AMBRA1\AMBRA1_905-920_output	1client	WT	unknown	AAFIPSSQRGFPDEGI	rank_007	0.83	B-C	0.941154	B	A,2-9	AFIPSSQR	26.6	11.163	15.431
postGMF-runs\2client\WT_analysis\more_scans\AMBRA1\AMBRA1_905-920_output	2client	WT	unknown	AAFIPSSQRGFPDEGI	rank_012	0.85	C-D	0.931154	C	A,3-10	FIPSSQRG	71.04	5.397	8.305		postGMF-runs\1client\WT_analysis\more_scans\AMBRA1\AMBRA1_905-920_output	1client	WT	unknown	AAFIPSSQRGFPDEGI	rank_007	0.83	B-C	0.941154	B	A,2-9	AFIPSSQR	26.6	11.163	15.431
postGMF-runs\2client\WT_analysis\more_scans\AMBRA1\AMBRA1_905-920_output	2client	WT	unknown	AAFIPSSQRGFPDEGI	rank_013	0.84	C-D	0.931538	D	B,4-11	IPSSQRGF	65.301	5.81	9.055		postGMF-runs\1client\WT_analysis\more_scans\AMBRA1\AMBRA1_905-920_output	1client	WT	unknown	AAFIPSSQRGFPDEGI	rank_009	0.83	B-C	0.935385	B	A,4-11	IPSSQRGF	26.596	12.014	16.857
postGMF-runs\2client\WT_analysis\more_scans\AMBRA1\AMBRA1_905-920_output	2client	WT	unknown	AAFIPSSQRGFPDEGI	rank_013	0.84	C-D	0.931538	C	A,4-11	IPSSQRGF	63.586	5.954	9.314		postGMF-runs\1client\WT_analysis\more_scans\AMBRA1\AMBRA1_905-920_output	1client	WT	unknown	AAFIPSSQRGFPDEGI	rank_009	0.83	B-C	0.935385	B	A,4-11	IPSSQRGF	26.596	12.014	16.857
postGMF-runs\2client\WT_analysis\more_scans\AMBRA1\AMBRA1_905-920_output	2client	WT	unknown	AAFIPSSQRGFPDEGI	rank_018	0.79	C-D	0.930455	C	A,9-16	RGFPDEGI	52.432	8.618	10.968		postGMF-runs\1client\WT_analysis\more_scans\AMBRA1\AMBRA1_905-920_output	1client	WT	unknown	AAFIPSSQRGFPDEGI	rank_016	0.82	B-C	0.930833	B	A,4-11	IPSSQRGF	25.858	12.203	16.613
postGMF-runs\2client\WT_analysis\more_scans\AMBRA1\AMBRA1_905-920_output	2client	WT	unknown	AAFIPSSQRGFPDEGI	rank_018	0.79	C-D	0.930455	D	B,9-16	RGFPDEGI	49.974	8.901	11.362		postGMF-runs\1client\WT_analysis\more_scans\AMBRA1\AMBRA1_905-920_output	1client	WT	unknown	AAFIPSSQRGFPDEGI	rank_016	0.82	B-C	0.930833	B	A,4-11	IPSSQRGF	25.858	12.203	16.613
postGMF-runs\2client\WT_analysis\more_scans\AMBRA1\AMBRA1_905-920_output	2client	WT	unknown	AAFIPSSQRGFPDEGI	rank_020	0.79	C-D	0.926538	D	A,3-10	FIPSSQRG	44.935	8.765	12.07		postGMF-runs\1client\WT_analysis\more_scans\AMBRA1\AMBRA1_905-920_output	1client	WT	unknown	AAFIPSSQRGFPDEGI	rank_014	0.82	B-C	0.936154	C	A,3-10	FIPSSQRG	25.65	12.031	16.889
postGMF-runs\2client\WT_analysis\more_scans\AMBRA1\AMBRA1_905-920_output	2client	WT	unknown	AAFIPSSQRGFPDEGI	rank_020	0.79	C-D	0.926538	C	B,3-10	FIPSSQRG	44.554	8.742	12.048		postGMF-runs\1client\WT_analysis\more_scans\AMBRA1\AMBRA1_905-920_output	1client	WT	unknown	AAFIPSSQRGFPDEGI	rank_014	0.82	B-C	0.936154	C	A,3-10	FIPSSQRG	25.65	12.031	16.889
postGMF-runs\2client\WT_analysis\more_scans\AMBRA1\AMBRA1_905-920_output	2client	WT	unknown	AAFIPSSQRGFPDEGI	rank_024	0.79	C-D	0.948462	C	A,1-8	AAFIPSSQ	43.868	7.255	12.166		postGMF-runs\1client\WT_analysis\more_scans\AMBRA1\AMBRA1_905-920_output	1client	WT	unknown	AAFIPSSQRGFPDEGI	rank_015	0.82	B-C	0.986154	B	A,1-8	AAFIPSSQ	24.956	14.163	16.77
postGMF-runs\2client\WT_analysis\more_scans\AMBRA1\AMBRA1_905-920_output	2client	WT	unknown	AAFIPSSQRGFPDEGI	rank_024	0.79	C-D	0.948462	D	B,1-8	AAFIPSSQ	41.818	7.41	12.478		postGMF-runs\1client\WT_analysis\more_scans\AMBRA1\AMBRA1_905-920_output	1client	WT	unknown	AAFIPSSQRGFPDEGI	rank_015	0.82	B-C	0.986154	B	A,1-8	AAFIPSSQ	24.956	14.163	16.77
postGMF-runs\2client\WT_analysis\more_scans\AMBRA1\AMBRA1_905-920_output	2client	WT	unknown	AAFIPSSQRGFPDEGI	rank_017	0.79	C-D	0.947273	C	B,2-9	AFIPSSQR	43.642	6.624	12.062		postGMF-runs\1client\WT_analysis\more_scans\AMBRA1\AMBRA1_905-920_output	1client	WT	unknown	AAFIPSSQRGFPDEGI	rank_025	0.82	B-C	0.942273	B	A,4-11	IPSSQRGF	24.66	14.356	16.729
postGMF-runs\2client\WT_analysis\more_scans\AMBRA1\AMBRA1_905-920_output	2client	WT	unknown	AAFIPSSQRGFPDEGI	rank_017	0.79	C-D	0.947273	D	A,2-9	AFIPSSQR	43.207	6.618	12.092		postGMF-runs\1client\WT_analysis\more_scans\AMBRA1\AMBRA1_905-920_output	1client	WT	unknown	AAFIPSSQRGFPDEGI	rank_025	0.82	B-C	0.942273	B	A,4-11	IPSSQRGF	24.66	14.356	16.729
postGMF-runs\2client\WT_analysis\more_scans\AMBRA1\AMBRA1_905-920_output	2client	WT	unknown	AAFIPSSQRGFPDEGI	rank_016	0.8	C-D	0.919545	D	B,2-9	AFIPSSQR	40.47	6.23	12.284		postGMF-runs\1client\WT_analysis\more_scans\AMBRA1\AMBRA1_905-920_output	1client	WT	unknown	AAFIPSSQRGFPDEGI	rank_008	0.83	B-C	0.959167	B	A,1-8	AAFIPSSQ	23.308	16.789	18.893
postGMF-runs\2client\WT_analysis\more_scans\AMBRA1\AMBRA1_905-920_output	2client	WT	unknown	AAFIPSSQRGFPDEGI	rank_016	0.8	C-D	0.919545	C	A,2-9	AFIPSSQR	40.266	6.289	12.335		postGMF-runs\1client\WT_analysis\more_scans\AMBRA1\AMBRA1_905-920_output	1client	WT	unknown	AAFIPSSQRGFPDEGI	rank_008	0.83	B-C	0.959167	B	A,1-8	AAFIPSSQ	23.308	16.789	18.893
postGMF-runs\2client\WT_analysis\more_scans\AMBRA1\AMBRA1_905-920_output	2client	WT	unknown	AAFIPSSQRGFPDEGI	rank_014	0.8	C-D	0.925385	C	B,2-9	AFIPSSQR	40.437	6.189	12.056
postGMF-runs\2client\WT_analysis\more_scans\AMBRA1\AMBRA1_905-920_output	2client	WT	unknown	AAFIPSSQRGFPDEGI	rank_014	0.8	C-D	0.925385	D	A,2-9	AFIPSSQR	39.081	6.141	12.176
postGMF-runs\2client\WT_analysis\more_scans\AMBRA1\AMBRA1_905-920_output	2client	WT	unknown	AAFIPSSQRGFPDEGI	rank_019	0.79	C-D	0.938077	D	A,1-8	AAFIPSSQ	38.943	7.34	12.965
postGMF-runs\2client\WT_analysis\more_scans\AMBRA1\AMBRA1_905-920_output	2client	WT	unknown	AAFIPSSQRGFPDEGI	rank_019	0.79	C-D	0.938077	C	B,2-9	AFIPSSQR	38.451	7.054	12.807
postGMF-runs\2client\WT_analysis\more_scans\AMBRA1\AMBRA1_905-920_output	2client	WT	unknown	AAFIPSSQRGFPDEGI	rank_023	0.79	C-D	0.953846	C	B,1-8	AAFIPSSQ	36.968	7.431	13.277
postGMF-runs\2client\WT_analysis\more_scans\AMBRA1\AMBRA1_905-920_output	2client	WT	unknown	AAFIPSSQRGFPDEGI	rank_023	0.79	C-D	0.953846	D	A,1-8	AAFIPSSQ	36.859	7.395	13.263
postGMF-runs\2client\WT_analysis\more_scans\AMBRA1\AMBRA1_905-920_output	2client	WT	unknown	AAFIPSSQRGFPDEGI	rank_021	0.79	C-D	0.925769	D	A,1-8	AAFIPSSQ	36.276	7.127	13.13
postGMF-runs\2client\WT_analysis\more_scans\AMBRA1\AMBRA1_905-920_output	2client	WT	unknown	AAFIPSSQRGFPDEGI	rank_021	0.79	C-D	0.925769	C	B,1-8	AAFIPSSQ	35.296	7.193	13.226
postGMF-runs\2client\WT_analysis\more_scans\NRF1\NRF1_73-88_output	2client	WT	unknown	AAGPVGMAAAAAVATG	rank_001	0.85	C-D	1.01182	C	A,8-15	AAAAAVAT	84.444	2.152	4.383		postGMF-runs\1client\WT_analysis\more_scans\NRF1\NRF1_73-88_output	1client	WT	unknown	AAGPVGMAAAAAVATG	rank_001	0.86	B-C	1.03385	B	A,8-15	AAAAAVAT	76.529	3.928	6.242
postGMF-runs\2client\WT_analysis\more_scans\NRF1\NRF1_73-88_output	2client	WT	unknown	AAGPVGMAAAAAVATG	rank_001	0.85	C-D	1.01182	D	B,8-15	AAAAAVAT	84.024	2.212	4.447		postGMF-runs\1client\WT_analysis\more_scans\NRF1\NRF1_73-88_output	1client	WT	unknown	AAGPVGMAAAAAVATG	rank_001	0.86	B-C	1.03385	B	A,8-15	AAAAAVAT	76.529	3.928	6.242
postGMF-runs\2client\WT_analysis\more_scans\NRF1\NRF1_73-88_output	2client	WT	unknown	AAGPVGMAAAAAVATG	rank_005	0.79	C-D	1.03	D	B,7-14	MAAAAAVA	53.391	6.802	10.233		postGMF-runs\1client\WT_analysis\more_scans\NRF1\NRF1_73-88_output	1client	WT	unknown	AAGPVGMAAAAAVATG	rank_002	0.83	B-C	1.02042	C	A,8-15	AAAAAVAT	48.5	7.67	10.544
postGMF-runs\2client\WT_analysis\more_scans\NRF1\NRF1_73-88_output	2client	WT	unknown	AAGPVGMAAAAAVATG	rank_005	0.79	C-D	1.03	C	A,7-14	MAAAAAVA	50.64	7.125	10.493		postGMF-runs\1client\WT_analysis\more_scans\NRF1\NRF1_73-88_output	1client	WT	unknown	AAGPVGMAAAAAVATG	rank_002	0.83	B-C	1.02042	C	A,8-15	AAAAAVAT	48.5	7.67	10.544
postGMF-runs\2client\WT_analysis\more_scans\NRF1\NRF1_73-88_output	2client	WT	unknown	AAGPVGMAAAAAVATG	rank_002	0.8	C-D	0.990909	C	A,7-14	MAAAAAVA	49.436	5.936	10.948		postGMF-runs\1client\WT_analysis\more_scans\NRF1\NRF1_73-88_output	1client	WT	unknown	AAGPVGMAAAAAVATG	rank_015	0.81	B-C	1.08167	B	A,4-11	PVGMAAAA	39.345	10.371	13.007
postGMF-runs\2client\WT_analysis\more_scans\NRF1\NRF1_73-88_output	2client	WT	unknown	AAGPVGMAAAAAVATG	rank_002	0.8	C-D	0.990909	D	B,6-13	GMAAAAAV	48.357	5.866	11.313		postGMF-runs\1client\WT_analysis\more_scans\NRF1\NRF1_73-88_output	1client	WT	unknown	AAGPVGMAAAAAVATG	rank_015	0.81	B-C	1.08167	B	A,4-11	PVGMAAAA	39.345	10.371	13.007
postGMF-runs\2client\WT_analysis\more_scans\NRF1\NRF1_73-88_output	2client	WT	unknown	AAGPVGMAAAAAVATG	rank_009	0.78	C-D	1.03538	C	A,7-14	MAAAAAVA	43.556	7.524	11.501		postGMF-runs\1client\WT_analysis\more_scans\NRF1\NRF1_73-88_output	1client	WT	unknown	AAGPVGMAAAAAVATG	rank_022	0.78	B-C	1.35909	C	A,4-11	PVGMAAAA	36.267	8.793	12.53
postGMF-runs\2client\WT_analysis\more_scans\NRF1\NRF1_73-88_output	2client	WT	unknown	AAGPVGMAAAAAVATG	rank_009	0.78	C-D	1.03538	D	B,7-14	MAAAAAVA	43.314	7.47	11.524		postGMF-runs\1client\WT_analysis\more_scans\NRF1\NRF1_73-88_output	1client	WT	unknown	AAGPVGMAAAAAVATG	rank_022	0.78	B-C	1.35909	C	A,4-11	PVGMAAAA	36.267	8.793	12.53
postGMF-runs\2client\WT_analysis\more_scans\NRF1\NRF1_73-88_output	2client	WT	unknown	AAGPVGMAAAAAVATG	rank_021	0.76	C-D	1.39393	C	B,4-11	PVGMAAAA	43.414	6.076	11.098		postGMF-runs\1client\WT_analysis\more_scans\NRF1\NRF1_73-88_output	1client	WT	unknown	AAGPVGMAAAAAVATG	rank_004	0.82	B-C	1.02364	C	A,7-14	MAAAAAVA	36.185	9.225	12.405
postGMF-runs\2client\WT_analysis\more_scans\NRF1\NRF1_73-88_output	2client	WT	unknown	AAGPVGMAAAAAVATG	rank_021	0.76	C-D	1.39393	D	A,4-11	PVGMAAAA	42.583	6.091	11.305		postGMF-runs\1client\WT_analysis\more_scans\NRF1\NRF1_73-88_output	1client	WT	unknown	AAGPVGMAAAAAVATG	rank_004	0.82	B-C	1.02364	C	A,7-14	MAAAAAVA	36.185	9.225	12.405
postGMF-runs\2client\WT_analysis\more_scans\NRF1\NRF1_73-88_output	2client	WT	unknown	AAGPVGMAAAAAVATG	rank_025	0.74	C-D	1.46542	C	B,4-11	PVGMAAAA	42.98	6.103	11.406		postGMF-runs\1client\WT_analysis\more_scans\NRF1\NRF1_73-88_output	1client	WT	unknown	AAGPVGMAAAAAVATG	rank_023	0.78	B-C	1.40542	C	A,5-12	VGMAAAAA	35.948	9.068	12.742
postGMF-runs\2client\WT_analysis\more_scans\NRF1\NRF1_73-88_output	2client	WT	unknown	AAGPVGMAAAAAVATG	rank_025	0.74	C-D	1.46542	D	A,4-11	PVGMAAAA	42.851	6.196	11.495		postGMF-runs\1client\WT_analysis\more_scans\NRF1\NRF1_73-88_output	1client	WT	unknown	AAGPVGMAAAAAVATG	rank_023	0.78	B-C	1.40542	C	A,5-12	VGMAAAAA	35.948	9.068	12.742
postGMF-runs\2client\WT_analysis\more_scans\NRF1\NRF1_73-88_output	2client	WT	unknown	AAGPVGMAAAAAVATG	rank_020	0.77	C-D	1.174	D	B,4-11	PVGMAAAA	41.585	7.611	12.266		postGMF-runs\1client\WT_analysis\more_scans\NRF1\NRF1_73-88_output	1client	WT	unknown	AAGPVGMAAAAAVATG	rank_021	0.78	B-C	1.35	C	A,4-11	PVGMAAAA	35.43	8.587	12.362
postGMF-runs\2client\WT_analysis\more_scans\NRF1\NRF1_73-88_output	2client	WT	unknown	AAGPVGMAAAAAVATG	rank_020	0.77	C-D	1.174	C	A,4-11	PVGMAAAA	41.286	7.595	12.236		postGMF-runs\1client\WT_analysis\more_scans\NRF1\NRF1_73-88_output	1client	WT	unknown	AAGPVGMAAAAAVATG	rank_021	0.78	B-C	1.35	C	A,4-11	PVGMAAAA	35.43	8.587	12.362
postGMF-runs\2client\WT_analysis\more_scans\NRF1\NRF1_73-88_output	2client	WT	unknown	AAGPVGMAAAAAVATG	rank_024	0.75	C-D	1.42833	C	A,4-11	PVGMAAAA	41.429	6.365	11.854		postGMF-runs\1client\WT_analysis\more_scans\NRF1\NRF1_73-88_output	1client	WT	unknown	AAGPVGMAAAAAVATG	rank_018	0.8	B-C	1.06375	C	A,4-11	PVGMAAAA	33.645	10.844	14.315
postGMF-runs\2client\WT_analysis\more_scans\NRF1\NRF1_73-88_output	2client	WT	unknown	AAGPVGMAAAAAVATG	rank_024	0.75	C-D	1.42833	D	B,4-11	PVGMAAAA	41.351	6.311	11.808		postGMF-runs\1client\WT_analysis\more_scans\NRF1\NRF1_73-88_output	1client	WT	unknown	AAGPVGMAAAAAVATG	rank_018	0.8	B-C	1.06375	C	A,4-11	PVGMAAAA	33.645	10.844	14.315
postGMF-runs\2client\WT_analysis\more_scans\NRF1\NRF1_73-88_output	2client	WT	unknown	AAGPVGMAAAAAVATG	rank_010	0.78	C-D	1.03	C	A,7-14	MAAAAAVA	41.004	6.728	11.486		postGMF-runs\1client\WT_analysis\more_scans\NRF1\NRF1_73-88_output	1client	WT	unknown	AAGPVGMAAAAAVATG	rank_017	0.8	B-C	1.073	C	A,5-12	VGMAAAAA	32.703	9.662	13.548
postGMF-runs\2client\WT_analysis\more_scans\NRF1\NRF1_73-88_output	2client	WT	unknown	AAGPVGMAAAAAVATG	rank_010	0.78	C-D	1.03	D	B,6-13	GMAAAAAV	37.995	7.391	12.254		postGMF-runs\1client\WT_analysis\more_scans\NRF1\NRF1_73-88_output	1client	WT	unknown	AAGPVGMAAAAAVATG	rank_017	0.8	B-C	1.073	C	A,5-12	VGMAAAAA	32.703	9.662	13.548
postGMF-runs\2client\WT_analysis\more_scans\NRF1\NRF1_73-88_output	2client	WT	unknown	AAGPVGMAAAAAVATG	rank_017	0.77	C-D	1.25385	C	B,5-12	VGMAAAAA	40.211	5.992	11.671		postGMF-runs\1client\WT_analysis\more_scans\NRF1\NRF1_73-88_output	1client	WT	unknown	AAGPVGMAAAAAVATG	rank_005	0.82	B-C	1.01045	C	A,7-14	MAAAAAVA	31.935	9.493	12.564
postGMF-runs\2client\WT_analysis\more_scans\NRF1\NRF1_73-88_output	2client	WT	unknown	AAGPVGMAAAAAVATG	rank_017	0.77	C-D	1.25385	D	A,5-12	VGMAAAAA	40.184	5.997	11.762		postGMF-runs\1client\WT_analysis\more_scans\NRF1\NRF1_73-88_output	1client	WT	unknown	AAGPVGMAAAAAVATG	rank_005	0.82	B-C	1.01045	C	A,7-14	MAAAAAVA	31.935	9.493	12.564
postGMF-runs\2client\WT_analysis\more_scans\NRF1\NRF1_73-88_output	2client	WT	unknown	AAGPVGMAAAAAVATG	rank_023	0.75	C-D	1.24917	C	A,4-11	PVGMAAAA	39.583	7.393	12.201		postGMF-runs\1client\WT_analysis\more_scans\NRF1\NRF1_73-88_output	1client	WT	unknown	AAGPVGMAAAAAVATG	rank_019	0.8	B-C	1.05591	C	A,4-11	PVGMAAAA	31.765	11.193	14.513
postGMF-runs\2client\WT_analysis\more_scans\NRF1\NRF1_73-88_output	2client	WT	unknown	AAGPVGMAAAAAVATG	rank_023	0.75	C-D	1.24917	D	B,4-11	PVGMAAAA	39.515	7.384	12.256		postGMF-runs\1client\WT_analysis\more_scans\NRF1\NRF1_73-88_output	1client	WT	unknown	AAGPVGMAAAAAVATG	rank_019	0.8	B-C	1.05591	C	A,4-11	PVGMAAAA	31.765	11.193	14.513
postGMF-runs\2client\WT_analysis\more_scans\NRF1\NRF1_73-88_output	2client	WT	unknown	AAGPVGMAAAAAVATG	rank_003	0.79	C-D	0.986364	D	A,7-14	MAAAAAVA	39.12	6.059	11.231		postGMF-runs\1client\WT_analysis\more_scans\NRF1\NRF1_73-88_output	1client	WT	unknown	AAGPVGMAAAAAVATG	rank_003	0.82	B-C	0.970909	B	A,7-14	MAAAAAVA	31.589	9.479	13.413
postGMF-runs\2client\WT_analysis\more_scans\NRF1\NRF1_73-88_output	2client	WT	unknown	AAGPVGMAAAAAVATG	rank_003	0.79	C-D	0.986364	C	B,7-14	MAAAAAVA	36.464	6.583	12.293		postGMF-runs\1client\WT_analysis\more_scans\NRF1\NRF1_73-88_output	1client	WT	unknown	AAGPVGMAAAAAVATG	rank_003	0.82	B-C	0.970909	B	A,7-14	MAAAAAVA	31.589	9.479	13.413
postGMF-runs\2client\WT_analysis\more_scans\NRF1\NRF1_73-88_output	2client	WT	unknown	AAGPVGMAAAAAVATG	rank_018	0.77	C-D	1.03375	C	B,6-13	GMAAAAAV	38.511	7.951	12.289		postGMF-runs\1client\WT_analysis\more_scans\NRF1\NRF1_73-88_output	1client	WT	unknown	AAGPVGMAAAAAVATG	rank_024	0.78	B-C	1.36955	B	A,7-14	MAAAAAVA	30.815	9.5	13.872
postGMF-runs\2client\WT_analysis\more_scans\NRF1\NRF1_73-88_output	2client	WT	unknown	AAGPVGMAAAAAVATG	rank_018	0.77	C-D	1.03375	D	A,6-13	GMAAAAAV	38.138	8.075	12.407		postGMF-runs\1client\WT_analysis\more_scans\NRF1\NRF1_73-88_output	1client	WT	unknown	AAGPVGMAAAAAVATG	rank_024	0.78	B-C	1.36955	B	A,7-14	MAAAAAVA	30.815	9.5	13.872
postGMF-runs\2client\WT_analysis\more_scans\NRF1\NRF1_73-88_output	2client	WT	unknown	AAGPVGMAAAAAVATG	rank_022	0.75	C-D	1.30867	D	B,7-14	MAAAAAVA	38.265	6.483	12.279		postGMF-runs\1client\WT_analysis\more_scans\NRF1\NRF1_73-88_output	1client	WT	unknown	AAGPVGMAAAAAVATG	rank_007	0.82	B-C	1.01	C	A,4-11	PVGMAAAA	30.736	9.343	13.466
postGMF-runs\2client\WT_analysis\more_scans\NRF1\NRF1_73-88_output	2client	WT	unknown	AAGPVGMAAAAAVATG	rank_022	0.75	C-D	1.30867	C	A,7-14	MAAAAAVA	37.736	6.545	12.289		postGMF-runs\1client\WT_analysis\more_scans\NRF1\NRF1_73-88_output	1client	WT	unknown	AAGPVGMAAAAAVATG	rank_007	0.82	B-C	1.01	C	A,4-11	PVGMAAAA	30.736	9.343	13.466
postGMF-runs\2client\WT_analysis\more_scans\NRF1\NRF1_73-88_output	2client	WT	unknown	AAGPVGMAAAAAVATG	rank_008	0.78	C-D	0.99	C	B,6-13	GMAAAAAV	37.901	7.292	12.464		postGMF-runs\1client\WT_analysis\more_scans\NRF1\NRF1_73-88_output	1client	WT	unknown	AAGPVGMAAAAAVATG	rank_012	0.81	B-C	1.06045	B	A,7-14	MAAAAAVA	30.074	10.287	13.163
postGMF-runs\2client\WT_analysis\more_scans\NRF1\NRF1_73-88_output	2client	WT	unknown	AAGPVGMAAAAAVATG	rank_008	0.78	C-D	0.99	D	A,6-13	GMAAAAAV	37.088	7.565	12.585		postGMF-runs\1client\WT_analysis\more_scans\NRF1\NRF1_73-88_output	1client	WT	unknown	AAGPVGMAAAAAVATG	rank_012	0.81	B-C	1.06045	B	A,7-14	MAAAAAVA	30.074	10.287	13.163
postGMF-runs\2client\WT_analysis\more_scans\NRF1\NRF1_73-88_output	2client	WT	unknown	AAGPVGMAAAAAVATG	rank_014	0.78	C-D	1.00182	D	A,7-14	MAAAAAVA	37.563	7.667	12.44		postGMF-runs\1client\WT_analysis\more_scans\NRF1\NRF1_73-88_output	1client	WT	unknown	AAGPVGMAAAAAVATG	rank_020	0.8	B-C	1.194	B	A,6-13	GMAAAAAV	28.787	11.705	16.073
postGMF-runs\2client\WT_analysis\more_scans\NRF1\NRF1_73-88_output	2client	WT	unknown	AAGPVGMAAAAAVATG	rank_014	0.78	C-D	1.00182	C	B,7-14	MAAAAAVA	36.901	7.425	12.276		postGMF-runs\1client\WT_analysis\more_scans\NRF1\NRF1_73-88_output	1client	WT	unknown	AAGPVGMAAAAAVATG	rank_020	0.8	B-C	1.194	B	A,6-13	GMAAAAAV	28.787	11.705	16.073
postGMF-runs\2client\WT_analysis\more_scans\NRF1\NRF1_73-88_output	2client	WT	unknown	AAGPVGMAAAAAVATG	rank_004	0.79	C-D	0.985455	D	A,7-14	MAAAAAVA	37.254	6.182	11.46		postGMF-runs\1client\WT_analysis\more_scans\NRF1\NRF1_73-88_output	1client	WT	unknown	AAGPVGMAAAAAVATG	rank_020	0.8	B-C	1.194	C	A,1-8	AAGPVGMA	26.305	14.589	17.195
postGMF-runs\2client\WT_analysis\more_scans\NRF1\NRF1_73-88_output	2client	WT	unknown	AAGPVGMAAAAAVATG	rank_004	0.79	C-D	0.985455	C	B,7-14	MAAAAAVA	36.361	6.737	12.081		postGMF-runs\1client\WT_analysis\more_scans\NRF1\NRF1_73-88_output	1client	WT	unknown	AAGPVGMAAAAAVATG	rank_020	0.8	B-C	1.194	C	A,1-8	AAGPVGMA	26.305	14.589	17.195
postGMF-runs\2client\WT_analysis\more_scans\NRF1\NRF1_73-88_output	2client	WT	unknown	AAGPVGMAAAAAVATG	rank_012	0.78	C-D	0.973636	C	B,6-13	GMAAAAAV	35.793	7.726	12.85		postGMF-runs\1client\WT_analysis\more_scans\NRF1\NRF1_73-88_output	1client	WT	unknown	AAGPVGMAAAAAVATG	rank_009	0.82	B-C	1.02682	B	A,5-12	VGMAAAAA	28.428	9.527	14.304
postGMF-runs\2client\WT_analysis\more_scans\NRF1\NRF1_73-88_output	2client	WT	unknown	AAGPVGMAAAAAVATG	rank_012	0.78	C-D	0.973636	D	A,6-13	GMAAAAAV	35.292	7.679	12.849		postGMF-runs\1client\WT_analysis\more_scans\NRF1\NRF1_73-88_output	1client	WT	unknown	AAGPVGMAAAAAVATG	rank_009	0.82	B-C	1.02682	B	A,5-12	VGMAAAAA	28.428	9.527	14.304
postGMF-runs\2client\WT_analysis\more_scans\NRF1\NRF1_73-88_output	2client	WT	unknown	AAGPVGMAAAAAVATG	rank_006	0.78	C-D	0.996818	C	B,7-14	MAAAAAVA	34.831	6.785	12.878		postGMF-runs\1client\WT_analysis\more_scans\NRF1\NRF1_73-88_output	1client	WT	unknown	AAGPVGMAAAAAVATG	rank_025	0.76	B-C	1.40923	C	A,4-11	PVGMAAAA	28.012	10.785	16.805
postGMF-runs\2client\WT_analysis\more_scans\NRF1\NRF1_73-88_output	2client	WT	unknown	AAGPVGMAAAAAVATG	rank_006	0.78	C-D	0.996818	D	A,7-14	MAAAAAVA	34.731	6.803	12.923		postGMF-runs\1client\WT_analysis\more_scans\NRF1\NRF1_73-88_output	1client	WT	unknown	AAGPVGMAAAAAVATG	rank_025	0.76	B-C	1.40923	C	A,4-11	PVGMAAAA	28.012	10.785	16.805
postGMF-runs\2client\WT_analysis\more_scans\NRF1\NRF1_73-88_output	2client	WT	unknown	AAGPVGMAAAAAVATG	rank_011	0.78	C-D	1.00682	C	A,6-13	GMAAAAAV	34.464	7.239	12.379		postGMF-runs\1client\WT_analysis\more_scans\NRF1\NRF1_73-88_output	1client	WT	unknown	AAGPVGMAAAAAVATG	rank_008	0.82	B-C	1.00182	C	A,6-13	GMAAAAAV	27.844	10.156	14.562
postGMF-runs\2client\WT_analysis\more_scans\NRF1\NRF1_73-88_output	2client	WT	unknown	AAGPVGMAAAAAVATG	rank_011	0.78	C-D	1.00682	D	B,6-13	GMAAAAAV	32.775	7.702	12.985		postGMF-runs\1client\WT_analysis\more_scans\NRF1\NRF1_73-88_output	1client	WT	unknown	AAGPVGMAAAAAVATG	rank_008	0.82	B-C	1.00182	C	A,6-13	GMAAAAAV	27.844	10.156	14.562
postGMF-runs\2client\WT_analysis\more_scans\NRF1\NRF1_73-88_output	2client	WT	unknown	AAGPVGMAAAAAVATG	rank_019	0.77	C-D	1.04364	C	B,4-11	PVGMAAAA	34.056	7.955	12.917		postGMF-runs\1client\WT_analysis\more_scans\NRF1\NRF1_73-88_output	1client	WT	unknown	AAGPVGMAAAAAVATG	rank_013	0.81	B-C	1.08045	B	A,4-11	PVGMAAAA	27.097	10.054	14.708
postGMF-runs\2client\WT_analysis\more_scans\NRF1\NRF1_73-88_output	2client	WT	unknown	AAGPVGMAAAAAVATG	rank_019	0.77	C-D	1.04364	D	A,4-11	PVGMAAAA	33.829	7.915	12.792		postGMF-runs\1client\WT_analysis\more_scans\NRF1\NRF1_73-88_output	1client	WT	unknown	AAGPVGMAAAAAVATG	rank_013	0.81	B-C	1.08045	B	A,4-11	PVGMAAAA	27.097	10.054	14.708
postGMF-runs\2client\WT_analysis\more_scans\NRF1\NRF1_73-88_output	2client	WT	unknown	AAGPVGMAAAAAVATG	rank_007	0.78	C-D	0.992273	C	B,7-14	MAAAAAVA	33.944	7.088	13.189		postGMF-runs\1client\WT_analysis\more_scans\NRF1\NRF1_73-88_output	1client	WT	unknown	AAGPVGMAAAAAVATG	rank_011	0.82	B-C	0.991364	C	A,6-13	GMAAAAAV	27.065	10.64	14.553
postGMF-runs\2client\WT_analysis\more_scans\NRF1\NRF1_73-88_output	2client	WT	unknown	AAGPVGMAAAAAVATG	rank_007	0.78	C-D	0.992273	D	A,7-14	MAAAAAVA	33.844	7.17	13.325		postGMF-runs\1client\WT_analysis\more_scans\NRF1\NRF1_73-88_output	1client	WT	unknown	AAGPVGMAAAAAVATG	rank_011	0.82	B-C	0.991364	C	A,6-13	GMAAAAAV	27.065	10.64	14.553
postGMF-runs\2client\WT_analysis\more_scans\NRF1\NRF1_73-88_output	2client	WT	unknown	AAGPVGMAAAAAVATG	rank_013	0.78	C-D	0.983636	C	A,6-13	GMAAAAAV	32.809	7.562	13.07		postGMF-runs\1client\WT_analysis\more_scans\NRF1\NRF1_73-88_output	1client	WT	unknown	AAGPVGMAAAAAVATG	rank_014	0.81	B-C	1.08682	C	A,5-12	VGMAAAAA	26.731	9.785	14.208
postGMF-runs\2client\WT_analysis\more_scans\NRF1\NRF1_73-88_output	2client	WT	unknown	AAGPVGMAAAAAVATG	rank_013	0.78	C-D	0.983636	D	B,6-13	GMAAAAAV	32.319	7.681	13.194		postGMF-runs\1client\WT_analysis\more_scans\NRF1\NRF1_73-88_output	1client	WT	unknown	AAGPVGMAAAAAVATG	rank_014	0.81	B-C	1.08682	C	A,5-12	VGMAAAAA	26.731	9.785	14.208
postGMF-runs\2client\WT_analysis\more_scans\NRF1\NRF1_73-88_output	2client	WT	unknown	AAGPVGMAAAAAVATG	rank_016	0.77	C-D	0.998333	C	B,6-13	GMAAAAAV	31.47	8.155	13.482		postGMF-runs\1client\WT_analysis\more_scans\NRF1\NRF1_73-88_output	1client	WT	unknown	AAGPVGMAAAAAVATG	rank_010	0.82	B-C	0.98	B	A,6-13	GMAAAAAV	26.549	10.404	14.723
postGMF-runs\2client\WT_analysis\more_scans\NRF1\NRF1_73-88_output	2client	WT	unknown	AAGPVGMAAAAAVATG	rank_016	0.77	C-D	0.998333	D	A,6-13	GMAAAAAV	30.301	8.334	13.725		postGMF-runs\1client\WT_analysis\more_scans\NRF1\NRF1_73-88_output	1client	WT	unknown	AAGPVGMAAAAAVATG	rank_010	0.82	B-C	0.98	B	A,6-13	GMAAAAAV	26.549	10.404	14.723
postGMF-runs\2client\WT_analysis\more_scans\NRF1\NRF1_73-88_output	2client	WT	unknown	AAGPVGMAAAAAVATG	rank_015	0.77	C-D	1.00364	D	A,6-13	GMAAAAAV	31.435	8.248	13.445		postGMF-runs\1client\WT_analysis\more_scans\NRF1\NRF1_73-88_output	1client	WT	unknown	AAGPVGMAAAAAVATG	rank_006	0.82	B-C	1.00455	B	A,6-13	GMAAAAAV	26.48	10.325	14.285
postGMF-runs\2client\WT_analysis\more_scans\NRF1\NRF1_73-88_output	2client	WT	unknown	AAGPVGMAAAAAVATG	rank_015	0.77	C-D	1.00364	C	B,6-13	GMAAAAAV	31.06	8.345	13.6		postGMF-runs\1client\WT_analysis\more_scans\NRF1\NRF1_73-88_output	1client	WT	unknown	AAGPVGMAAAAAVATG	rank_006	0.82	B-C	1.00455	B	A,6-13	GMAAAAAV	26.48	10.325	14.285
2client\hASCIZ-parsed\hASCIZ_9-24_output	2client	WT	unknown	AAGSAALAAGARAVPA	rank_002	0.8	C-D	1.03654	C	A,7-14	LAAGARAV	53.07	6.691	10.532		1client\hASCIZ-parsed\hASCIZ_9-24_output	1client	WT	unknown	AAGSAALAAGARAVPA	rank_001	0.83	B-C	0.974091	B	A,7-14	LAAGARAV	40.061	9.468	12.3
2client\hASCIZ-parsed\hASCIZ_9-24_output	2client	WT	unknown	AAGSAALAAGARAVPA	rank_002	0.8	C-D	1.03654	D	B,7-14	LAAGARAV	52.14	6.684	10.568		1client\hASCIZ-parsed\hASCIZ_9-24_output	1client	WT	unknown	AAGSAALAAGARAVPA	rank_001	0.83	B-C	0.974091	B	A,7-14	LAAGARAV	40.061	9.468	12.3
2client\hASCIZ-parsed\hASCIZ_9-24_output	2client	WT	unknown	AAGSAALAAGARAVPA	rank_011	0.78	C-D	1.03625	C	B,3-10	GSAALAAG	49.818	7.015	10.845		1client\hASCIZ-parsed\hASCIZ_9-24_output	1client	WT	unknown	AAGSAALAAGARAVPA	rank_023	0.76	B-C	1.48679	C	A,4-11	SAALAAGA	34.059	9.036	12.733
2client\hASCIZ-parsed\hASCIZ_9-24_output	2client	WT	unknown	AAGSAALAAGARAVPA	rank_011	0.78	C-D	1.03625	D	A,3-10	GSAALAAG	37.35	7.209	12.499		1client\hASCIZ-parsed\hASCIZ_9-24_output	1client	WT	unknown	AAGSAALAAGARAVPA	rank_023	0.76	B-C	1.48679	C	A,4-11	SAALAAGA	34.059	9.036	12.733
2client\hASCIZ-parsed\hASCIZ_9-24_output	2client	WT	unknown	AAGSAALAAGARAVPA	rank_001	0.81	C-D	0.985	C	B,3-10	GSAALAAG	49.289	5.511	10.138		1client\hASCIZ-parsed\hASCIZ_9-24_output	1client	WT	unknown	AAGSAALAAGARAVPA	rank_005	0.82	B-C	1.02	C	A,6-13	ALAAGARA	33.689	10.016	13.172
2client\hASCIZ-parsed\hASCIZ_9-24_output	2client	WT	unknown	AAGSAALAAGARAVPA	rank_001	0.81	C-D	0.985	D	A,3-10	GSAALAAG	48.661	5.706	10.398		1client\hASCIZ-parsed\hASCIZ_9-24_output	1client	WT	unknown	AAGSAALAAGARAVPA	rank_005	0.82	B-C	1.02	C	A,6-13	ALAAGARA	33.689	10.016	13.172
2client\hASCIZ-parsed\hASCIZ_9-24_output	2client	WT	unknown	AAGSAALAAGARAVPA	rank_021	0.75	C-D	1.50107	C	B,3-10	GSAALAAG	48.336	5.451	9.213		1client\hASCIZ-parsed\hASCIZ_9-24_output	1client	WT	unknown	AAGSAALAAGARAVPA	rank_022	0.76	B-C	1.46357	B	A,4-11	SAALAAGA	33.492	9.466	12.921
2client\hASCIZ-parsed\hASCIZ_9-24_output	2client	WT	unknown	AAGSAALAAGARAVPA	rank_021	0.75	C-D	1.50107	D	A,3-10	GSAALAAG	48.12	5.49	9.249		1client\hASCIZ-parsed\hASCIZ_9-24_output	1client	WT	unknown	AAGSAALAAGARAVPA	rank_022	0.76	B-C	1.46357	B	A,4-11	SAALAAGA	33.492	9.466	12.921
2client\hASCIZ-parsed\hASCIZ_9-24_output	2client	WT	unknown	AAGSAALAAGARAVPA	rank_025	0.73	C-D	1.57	D	B,2-9	AGSAALAA	47.619	5.586	9.17		1client\hASCIZ-parsed\hASCIZ_9-24_output	1client	WT	unknown	AAGSAALAAGARAVPA	rank_021	0.76	B-C	1.43964	B	A,4-11	SAALAAGA	32.891	9.339	12.966
2client\hASCIZ-parsed\hASCIZ_9-24_output	2client	WT	unknown	AAGSAALAAGARAVPA	rank_025	0.73	C-D	1.57	C	A,2-9	AGSAALAA	47.515	5.551	9.158		1client\hASCIZ-parsed\hASCIZ_9-24_output	1client	WT	unknown	AAGSAALAAGARAVPA	rank_021	0.76	B-C	1.43964	B	A,4-11	SAALAAGA	32.891	9.339	12.966
2client\hASCIZ-parsed\hASCIZ_9-24_output	2client	WT	unknown	AAGSAALAAGARAVPA	rank_023	0.74	C-D	1.56214	D	A,2-9	AGSAALAA	46.344	5.603	9.247		1client\hASCIZ-parsed\hASCIZ_9-24_output	1client	WT	unknown	AAGSAALAAGARAVPA	rank_014	0.81	B-C	1.02846	C	A,4-11	SAALAAGA	32.884	10.63	14.29
2client\hASCIZ-parsed\hASCIZ_9-24_output	2client	WT	unknown	AAGSAALAAGARAVPA	rank_023	0.74	C-D	1.56214	C	B,2-9	AGSAALAA	46.186	5.635	9.266		1client\hASCIZ-parsed\hASCIZ_9-24_output	1client	WT	unknown	AAGSAALAAGARAVPA	rank_014	0.81	B-C	1.02846	C	A,4-11	SAALAAGA	32.884	10.63	14.29
2client\hASCIZ-parsed\hASCIZ_9-24_output	2client	WT	unknown	AAGSAALAAGARAVPA	rank_024	0.73	C-D	1.51536	C	B,3-10	GSAALAAG	46.226	5.783	9.765		1client\hASCIZ-parsed\hASCIZ_9-24_output	1client	WT	unknown	AAGSAALAAGARAVPA	rank_011	0.81	B-C	1.03167	B	A,5-12	AALAAGAR	32.177	10.951	13.768
2client\hASCIZ-parsed\hASCIZ_9-24_output	2client	WT	unknown	AAGSAALAAGARAVPA	rank_024	0.73	C-D	1.51536	D	A,3-10	GSAALAAG	45.472	5.87	9.894		1client\hASCIZ-parsed\hASCIZ_9-24_output	1client	WT	unknown	AAGSAALAAGARAVPA	rank_011	0.81	B-C	1.03167	B	A,5-12	AALAAGAR	32.177	10.951	13.768
2client\hASCIZ-parsed\hASCIZ_9-24_output	2client	WT	unknown	AAGSAALAAGARAVPA	rank_022	0.74	C-D	1.53036	C	B,3-10	GSAALAAG	45.61	5.614	9.514		1client\hASCIZ-parsed\hASCIZ_9-24_output	1client	WT	unknown	AAGSAALAAGARAVPA	rank_025	0.75	B-C	1.51231	B	A,3-10	GSAALAAG	32.175	9.582	12.437
2client\hASCIZ-parsed\hASCIZ_9-24_output	2client	WT	unknown	AAGSAALAAGARAVPA	rank_022	0.74	C-D	1.53036	D	A,3-10	GSAALAAG	45.173	5.685	9.591		1client\hASCIZ-parsed\hASCIZ_9-24_output	1client	WT	unknown	AAGSAALAAGARAVPA	rank_025	0.75	B-C	1.51231	B	A,3-10	GSAALAAG	32.175	9.582	12.437
2client\hASCIZ-parsed\hASCIZ_9-24_output	2client	WT	unknown	AAGSAALAAGARAVPA	rank_007	0.79	C-D	1.00962	D	B,5-12	AALAAGAR	43.586	6.562	11.644		1client\hASCIZ-parsed\hASCIZ_9-24_output	1client	WT	unknown	AAGSAALAAGARAVPA	rank_004	0.82	B-C	0.974545	C	A,6-13	ALAAGARA	32.047	9.816	13.362
2client\hASCIZ-parsed\hASCIZ_9-24_output	2client	WT	unknown	AAGSAALAAGARAVPA	rank_007	0.79	C-D	1.00962	C	A,5-12	AALAAGAR	42.499	6.785	11.691		1client\hASCIZ-parsed\hASCIZ_9-24_output	1client	WT	unknown	AAGSAALAAGARAVPA	rank_004	0.82	B-C	0.974545	C	A,6-13	ALAAGARA	32.047	9.816	13.362
2client\hASCIZ-parsed\hASCIZ_9-24_output	2client	WT	unknown	AAGSAALAAGARAVPA	rank_005	0.8	C-D	1.13182	C	B,3-10	GSAALAAG	42.173	5.581	10.589		1client\hASCIZ-parsed\hASCIZ_9-24_output	1client	WT	unknown	AAGSAALAAGARAVPA	rank_016	0.81	B-C	1.1415	C	A,4-11	SAALAAGA	31.854	9.551	12.875
2client\hASCIZ-parsed\hASCIZ_9-24_output	2client	WT	unknown	AAGSAALAAGARAVPA	rank_005	0.8	C-D	1.13182	D	A,3-10	GSAALAAG	41.612	5.585	10.644		1client\hASCIZ-parsed\hASCIZ_9-24_output	1client	WT	unknown	AAGSAALAAGARAVPA	rank_016	0.81	B-C	1.1415	C	A,4-11	SAALAAGA	31.854	9.551	12.875
2client\hASCIZ-parsed\hASCIZ_9-24_output	2client	WT	unknown	AAGSAALAAGARAVPA	rank_003	0.8	C-D	1.12818	C	A,3-10	GSAALAAG	41.745	5.55	10.681		1client\hASCIZ-parsed\hASCIZ_9-24_output	1client	WT	unknown	AAGSAALAAGARAVPA	rank_006	0.82	B-C	0.997083	C	A,6-13	ALAAGARA	31.289	10.338	13.621
2client\hASCIZ-parsed\hASCIZ_9-24_output	2client	WT	unknown	AAGSAALAAGARAVPA	rank_003	0.8	C-D	1.12818	D	B,3-10	GSAALAAG	41.055	5.657	10.638		1client\hASCIZ-parsed\hASCIZ_9-24_output	1client	WT	unknown	AAGSAALAAGARAVPA	rank_006	0.82	B-C	0.997083	C	A,6-13	ALAAGARA	31.289	10.338	13.621
2client\hASCIZ-parsed\hASCIZ_9-24_output	2client	WT	unknown	AAGSAALAAGARAVPA	rank_004	0.8	C-D	1.10136	C	B,3-10	GSAALAAG	41.634	5.666	10.751		1client\hASCIZ-parsed\hASCIZ_9-24_output	1client	WT	unknown	AAGSAALAAGARAVPA	rank_015	0.81	B-C	1.12091	B	A,4-11	SAALAAGA	31.069	9.652	13.405
2client\hASCIZ-parsed\hASCIZ_9-24_output	2client	WT	unknown	AAGSAALAAGARAVPA	rank_004	0.8	C-D	1.10136	D	A,3-10	GSAALAAG	41.262	5.66	10.784		1client\hASCIZ-parsed\hASCIZ_9-24_output	1client	WT	unknown	AAGSAALAAGARAVPA	rank_015	0.81	B-C	1.12091	B	A,4-11	SAALAAGA	31.069	9.652	13.405
2client\hASCIZ-parsed\hASCIZ_9-24_output	2client	WT	unknown	AAGSAALAAGARAVPA	rank_010	0.78	C-D	0.991364	C	B,3-10	GSAALAAG	39.789	6.552	11.654		1client\hASCIZ-parsed\hASCIZ_9-24_output	1client	WT	unknown	AAGSAALAAGARAVPA	rank_024	0.76	B-C	1.46857	B	A,4-11	SAALAAGA	31.023	9.729	13.716
2client\hASCIZ-parsed\hASCIZ_9-24_output	2client	WT	unknown	AAGSAALAAGARAVPA	rank_010	0.78	C-D	0.991364	D	A,3-10	GSAALAAG	38.179	7.303	11.871		1client\hASCIZ-parsed\hASCIZ_9-24_output	1client	WT	unknown	AAGSAALAAGARAVPA	rank_024	0.76	B-C	1.46857	B	A,4-11	SAALAAGA	31.023	9.729	13.716
2client\hASCIZ-parsed\hASCIZ_9-24_output	2client	WT	unknown	AAGSAALAAGARAVPA	rank_006	0.79	C-D	1.08182	C	A,3-10	GSAALAAG	39.551	5.961	11.164		1client\hASCIZ-parsed\hASCIZ_9-24_output	1client	WT	unknown	AAGSAALAAGARAVPA	rank_009	0.81	B-C	1.01808	C	A,4-11	SAALAAGA	31	10.472	14.288
2client\hASCIZ-parsed\hASCIZ_9-24_output	2client	WT	unknown	AAGSAALAAGARAVPA	rank_006	0.79	C-D	1.08182	D	B,3-10	GSAALAAG	38.616	5.983	11.279		1client\hASCIZ-parsed\hASCIZ_9-24_output	1client	WT	unknown	AAGSAALAAGARAVPA	rank_009	0.81	B-C	1.01808	C	A,4-11	SAALAAGA	31	10.472	14.288
2client\hASCIZ-parsed\hASCIZ_9-24_output	2client	WT	unknown	AAGSAALAAGARAVPA	rank_014	0.77	C-D	1.14955	C	A,3-10	GSAALAAG	39.249	6.626	11.41		1client\hASCIZ-parsed\hASCIZ_9-24_output	1client	WT	unknown	AAGSAALAAGARAVPA	rank_012	0.81	B-C	1.08045	C	A,4-11	SAALAAGA	30.884	9.878	13.33
2client\hASCIZ-parsed\hASCIZ_9-24_output	2client	WT	unknown	AAGSAALAAGARAVPA	rank_014	0.77	C-D	1.14955	D	B,3-10	GSAALAAG	38.392	6.642	11.47		1client\hASCIZ-parsed\hASCIZ_9-24_output	1client	WT	unknown	AAGSAALAAGARAVPA	rank_012	0.81	B-C	1.08045	C	A,4-11	SAALAAGA	30.884	9.878	13.33
2client\hASCIZ-parsed\hASCIZ_9-24_output	2client	WT	unknown	AAGSAALAAGARAVPA	rank_009	0.79	C-D	1.01308	D	A,3-10	GSAALAAG	39.004	6.498	11.828		1client\hASCIZ-parsed\hASCIZ_9-24_output	1client	WT	unknown	AAGSAALAAGARAVPA	rank_008	0.82	B-C	1.01462	B	A,6-13	ALAAGARA	30.66	10.036	13.549
2client\hASCIZ-parsed\hASCIZ_9-24_output	2client	WT	unknown	AAGSAALAAGARAVPA	rank_009	0.79	C-D	1.01308	C	B,3-10	GSAALAAG	38.289	6.83	12.303		1client\hASCIZ-parsed\hASCIZ_9-24_output	1client	WT	unknown	AAGSAALAAGARAVPA	rank_008	0.82	B-C	1.01462	B	A,6-13	ALAAGARA	30.66	10.036	13.549
2client\hASCIZ-parsed\hASCIZ_9-24_output	2client	WT	unknown	AAGSAALAAGARAVPA	rank_017	0.78	C-D	0.997308	D	B,6-13	ALAAGARA	38.796	8.141	12.584		1client\hASCIZ-parsed\hASCIZ_9-24_output	1client	WT	unknown	AAGSAALAAGARAVPA	rank_002	0.82	B-C	0.983182	C	A,6-13	ALAAGARA	30.524	10.172	13.681
2client\hASCIZ-parsed\hASCIZ_9-24_output	2client	WT	unknown	AAGSAALAAGARAVPA	rank_017	0.78	C-D	0.997308	C	A,6-13	ALAAGARA	38.312	8.139	12.645		1client\hASCIZ-parsed\hASCIZ_9-24_output	1client	WT	unknown	AAGSAALAAGARAVPA	rank_002	0.82	B-C	0.983182	C	A,6-13	ALAAGARA	30.524	10.172	13.681
2client\hASCIZ-parsed\hASCIZ_9-24_output	2client	WT	unknown	AAGSAALAAGARAVPA	rank_008	0.79	C-D	0.970909	D	B,3-10	GSAALAAG	38.427	6.557	12.003		1client\hASCIZ-parsed\hASCIZ_9-24_output	1client	WT	unknown	AAGSAALAAGARAVPA	rank_003	0.82	B-C	0.967273	C	A,6-13	ALAAGARA	29.401	10.085	14.056
2client\hASCIZ-parsed\hASCIZ_9-24_output	2client	WT	unknown	AAGSAALAAGARAVPA	rank_008	0.79	C-D	0.970909	C	A,3-10	GSAALAAG	37.524	6.7	12.162		1client\hASCIZ-parsed\hASCIZ_9-24_output	1client	WT	unknown	AAGSAALAAGARAVPA	rank_003	0.82	B-C	0.967273	C	A,6-13	ALAAGARA	29.401	10.085	14.056
2client\hASCIZ-parsed\hASCIZ_9-24_output	2client	WT	unknown	AAGSAALAAGARAVPA	rank_013	0.78	C-D	0.999091	D	A,3-10	GSAALAAG	37.074	7.667	12.324		1client\hASCIZ-parsed\hASCIZ_9-24_output	1client	WT	unknown	AAGSAALAAGARAVPA	rank_010	0.81	B-C	1.04136	C	A,3-10	GSAALAAG	28.901	10.032	14.278
2client\hASCIZ-parsed\hASCIZ_9-24_output	2client	WT	unknown	AAGSAALAAGARAVPA	rank_013	0.78	C-D	0.999091	C	B,3-10	GSAALAAG	36.561	7.766	12.34		1client\hASCIZ-parsed\hASCIZ_9-24_output	1client	WT	unknown	AAGSAALAAGARAVPA	rank_010	0.81	B-C	1.04136	C	A,3-10	GSAALAAG	28.901	10.032	14.278
2client\hASCIZ-parsed\hASCIZ_9-24_output	2client	WT	unknown	AAGSAALAAGARAVPA	rank_018	0.78	C-D	0.982273	D	A,3-10	GSAALAAG	36.831	7.556	12.385		1client\hASCIZ-parsed\hASCIZ_9-24_output	1client	WT	unknown	AAGSAALAAGARAVPA	rank_007	0.82	B-C	0.99	B	A,5-12	AALAAGAR	28.609	10.512	14.408
2client\hASCIZ-parsed\hASCIZ_9-24_output	2client	WT	unknown	AAGSAALAAGARAVPA	rank_018	0.78	C-D	0.982273	C	B,3-10	GSAALAAG	35.506	7.439	12.452		1client\hASCIZ-parsed\hASCIZ_9-24_output	1client	WT	unknown	AAGSAALAAGARAVPA	rank_007	0.82	B-C	0.99	B	A,5-12	AALAAGAR	28.609	10.512	14.408
2client\hASCIZ-parsed\hASCIZ_9-24_output	2client	WT	unknown	AAGSAALAAGARAVPA	rank_016	0.78	C-D	0.988182	C	B,3-10	GSAALAAG	36.782	7.695	12.519		1client\hASCIZ-parsed\hASCIZ_9-24_output	1client	WT	unknown	AAGSAALAAGARAVPA	rank_019	0.8	B-C	1.205	B	A,4-11	SAALAAGA	28.389	9.997	13.414
2client\hASCIZ-parsed\hASCIZ_9-24_output	2client	WT	unknown	AAGSAALAAGARAVPA	rank_016	0.78	C-D	0.988182	D	A,3-10	GSAALAAG	36.289	7.568	12.489		1client\hASCIZ-parsed\hASCIZ_9-24_output	1client	WT	unknown	AAGSAALAAGARAVPA	rank_019	0.8	B-C	1.205	B	A,4-11	SAALAAGA	28.389	9.997	13.414
2client\hASCIZ-parsed\hASCIZ_9-24_output	2client	WT	unknown	AAGSAALAAGARAVPA	rank_015	0.78	C-D	0.985909	C	A,3-10	GSAALAAG	35.432	7.258	12.203		1client\hASCIZ-parsed\hASCIZ_9-24_output	1client	WT	unknown	AAGSAALAAGARAVPA	rank_013	0.81	B-C	1.02909	C	A,3-10	GSAALAAG	27.144	9.392	14.251
2client\hASCIZ-parsed\hASCIZ_9-24_output	2client	WT	unknown	AAGSAALAAGARAVPA	rank_015	0.78	C-D	0.985909	D	B,3-10	GSAALAAG	35.244	7.45	12.355		1client\hASCIZ-parsed\hASCIZ_9-24_output	1client	WT	unknown	AAGSAALAAGARAVPA	rank_013	0.81	B-C	1.02909	C	A,3-10	GSAALAAG	27.144	9.392	14.251
2client\hASCIZ-parsed\hASCIZ_9-24_output	2client	WT	unknown	AAGSAALAAGARAVPA	rank_012	0.78	C-D	0.999091	C	B,3-10	GSAALAAG	35.319	7.305	12.336		1client\hASCIZ-parsed\hASCIZ_9-24_output	1client	WT	unknown	AAGSAALAAGARAVPA	rank_018	0.81	B-C	1.06136	B	A,3-10	GSAALAAG	26.406	11.642	15.514
2client\hASCIZ-parsed\hASCIZ_9-24_output	2client	WT	unknown	AAGSAALAAGARAVPA	rank_012	0.78	C-D	0.999091	D	A,3-10	GSAALAAG	35.122	7.545	12.443		1client\hASCIZ-parsed\hASCIZ_9-24_output	1client	WT	unknown	AAGSAALAAGARAVPA	rank_018	0.81	B-C	1.06136	B	A,3-10	GSAALAAG	26.406	11.642	15.514
2client\hASCIZ-parsed\hASCIZ_9-24_output	2client	WT	unknown	AAGSAALAAGARAVPA	rank_019	0.77	C-D	1.00615	C	A,4-11	SAALAAGA	34.509	8.536	13.422		1client\hASCIZ-parsed\hASCIZ_9-24_output	1client	WT	unknown	AAGSAALAAGARAVPA	rank_020	0.79	B-C	1.24364	B	A,4-11	SAALAAGA	26.334	10.888	14.885
2client\hASCIZ-parsed\hASCIZ_9-24_output	2client	WT	unknown	AAGSAALAAGARAVPA	rank_019	0.77	C-D	1.00615	D	B,4-11	SAALAAGA	33.915	8.66	13.485		1client\hASCIZ-parsed\hASCIZ_9-24_output	1client	WT	unknown	AAGSAALAAGARAVPA	rank_020	0.79	B-C	1.24364	B	A,4-11	SAALAAGA	26.334	10.888	14.885
2client\hASCIZ-parsed\hASCIZ_9-24_output	2client	WT	unknown	AAGSAALAAGARAVPA	rank_020	0.77	C-D	0.9825	C	A,5-12	AALAAGAR	32.336	8.364	13.367
2client\hASCIZ-parsed\hASCIZ_9-24_output	2client	WT	unknown	AAGSAALAAGARAVPA	rank_020	0.77	C-D	0.9825	D	B,5-12	AALAAGAR	32.312	8.179	13.525
postGMF-runs\2client\WT_analysis\more_scans\GCOM1\GCOM1_457-472_output	2client	WT	unknown	AAIAECEEVRRKSELF	rank_003	0.79	C-D	0.969091	D	A,3-10	IAECEEVR	54.398	6.596	10.323		postGMF-runs\1client\WT_analysis\more_scans\GCOM1\GCOM1_457-472_output	1client	WT	unknown	AAIAECEEVRRKSELF	rank_006	0.82	B-C	0.984091	C	A,2-9	AIAECEEV	36.875	10.648	12.746
postGMF-runs\2client\WT_analysis\more_scans\GCOM1\GCOM1_457-472_output	2client	WT	unknown	AAIAECEEVRRKSELF	rank_003	0.79	C-D	0.969091	C	B,3-10	IAECEEVR	47.38	7.293	11.367		postGMF-runs\1client\WT_analysis\more_scans\GCOM1\GCOM1_457-472_output	1client	WT	unknown	AAIAECEEVRRKSELF	rank_006	0.82	B-C	0.984091	C	A,2-9	AIAECEEV	36.875	10.648	12.746
postGMF-runs\2client\WT_analysis\more_scans\GCOM1\GCOM1_457-472_output	2client	WT	unknown	AAIAECEEVRRKSELF	rank_002	0.79	C-D	0.99	C	A,2-9	AIAECEEV	45.422	5.799	11.072		postGMF-runs\1client\WT_analysis\more_scans\GCOM1\GCOM1_457-472_output	1client	WT	unknown	AAIAECEEVRRKSELF	rank_002	0.83	B-C	0.970385	C	A,3-10	IAECEEVR	35.277	8.811	12.258
postGMF-runs\2client\WT_analysis\more_scans\GCOM1\GCOM1_457-472_output	2client	WT	unknown	AAIAECEEVRRKSELF	rank_002	0.79	C-D	0.99	D	B,2-9	AIAECEEV	42.059	6.242	11.533		postGMF-runs\1client\WT_analysis\more_scans\GCOM1\GCOM1_457-472_output	1client	WT	unknown	AAIAECEEVRRKSELF	rank_002	0.83	B-C	0.970385	C	A,3-10	IAECEEVR	35.277	8.811	12.258
postGMF-runs\2client\WT_analysis\more_scans\GCOM1\GCOM1_457-472_output	2client	WT	unknown	AAIAECEEVRRKSELF	rank_005	0.79	C-D	0.955909	D	A,2-9	AIAECEEV	45.04	6.454	11.055		postGMF-runs\1client\WT_analysis\more_scans\GCOM1\GCOM1_457-472_output	1client	WT	unknown	AAIAECEEVRRKSELF	rank_001	0.83	B-C	0.96	B	A,3-10	IAECEEVR	34.431	8.646	12.228
postGMF-runs\2client\WT_analysis\more_scans\GCOM1\GCOM1_457-472_output	2client	WT	unknown	AAIAECEEVRRKSELF	rank_005	0.79	C-D	0.955909	C	B,2-9	AIAECEEV	39.316	7.215	11.852		postGMF-runs\1client\WT_analysis\more_scans\GCOM1\GCOM1_457-472_output	1client	WT	unknown	AAIAECEEVRRKSELF	rank_001	0.83	B-C	0.96	B	A,3-10	IAECEEVR	34.431	8.646	12.228
postGMF-runs\2client\WT_analysis\more_scans\GCOM1\GCOM1_457-472_output	2client	WT	unknown	AAIAECEEVRRKSELF	rank_004	0.79	C-D	0.964091	C	B,3-10	IAECEEVR	43.236	6.092	10.496		postGMF-runs\1client\WT_analysis\more_scans\GCOM1\GCOM1_457-472_output	1client	WT	unknown	AAIAECEEVRRKSELF	rank_004	0.82	B-C	0.987308	B	A,3-10	IAECEEVR	33.514	9.504	12.695
postGMF-runs\2client\WT_analysis\more_scans\GCOM1\GCOM1_457-472_output	2client	WT	unknown	AAIAECEEVRRKSELF	rank_004	0.79	C-D	0.964091	D	A,2-9	AIAECEEV	40.96	6.603	10.773		postGMF-runs\1client\WT_analysis\more_scans\GCOM1\GCOM1_457-472_output	1client	WT	unknown	AAIAECEEVRRKSELF	rank_004	0.82	B-C	0.987308	B	A,3-10	IAECEEVR	33.514	9.504	12.695
postGMF-runs\2client\WT_analysis\more_scans\GCOM1\GCOM1_457-472_output	2client	WT	unknown	AAIAECEEVRRKSELF	rank_001	0.8	C-D	0.975455	C	A,1-8	AAIAECEE	42.739	5.841	10.587		postGMF-runs\1client\WT_analysis\more_scans\GCOM1\GCOM1_457-472_output	1client	WT	unknown	AAIAECEEVRRKSELF	rank_012	0.82	B-C	0.98	C	A,2-9	AIAECEEV	32.306	9.902	12.857
postGMF-runs\2client\WT_analysis\more_scans\GCOM1\GCOM1_457-472_output	2client	WT	unknown	AAIAECEEVRRKSELF	rank_001	0.8	C-D	0.975455	D	B,1-8	AAIAECEE	42.612	5.906	10.678		postGMF-runs\1client\WT_analysis\more_scans\GCOM1\GCOM1_457-472_output	1client	WT	unknown	AAIAECEEVRRKSELF	rank_012	0.82	B-C	0.98	C	A,2-9	AIAECEEV	32.306	9.902	12.857
postGMF-runs\2client\WT_analysis\more_scans\GCOM1\GCOM1_457-472_output	2client	WT	unknown	AAIAECEEVRRKSELF	rank_009	0.79	C-D	0.975455	C	A,2-9	AIAECEEV	41.985	6.695	11.003		postGMF-runs\1client\WT_analysis\more_scans\GCOM1\GCOM1_457-472_output	1client	WT	unknown	AAIAECEEVRRKSELF	rank_003	0.82	B-C	0.964545	C	A,3-10	IAECEEVR	31.631	9.304	12.353
postGMF-runs\2client\WT_analysis\more_scans\GCOM1\GCOM1_457-472_output	2client	WT	unknown	AAIAECEEVRRKSELF	rank_009	0.79	C-D	0.975455	D	B,2-9	AIAECEEV	39.579	6.886	11.456		postGMF-runs\1client\WT_analysis\more_scans\GCOM1\GCOM1_457-472_output	1client	WT	unknown	AAIAECEEVRRKSELF	rank_003	0.82	B-C	0.964545	C	A,3-10	IAECEEVR	31.631	9.304	12.353
postGMF-runs\2client\WT_analysis\more_scans\GCOM1\GCOM1_457-472_output	2client	WT	unknown	AAIAECEEVRRKSELF	rank_007	0.79	C-D	0.987727	C	B,2-9	AIAECEEV	40.845	7.085	11.215		postGMF-runs\1client\WT_analysis\more_scans\GCOM1\GCOM1_457-472_output	1client	WT	unknown	AAIAECEEVRRKSELF	rank_005	0.82	B-C	0.975417	B	A,3-10	IAECEEVR	30.642	9.816	12.668
postGMF-runs\2client\WT_analysis\more_scans\GCOM1\GCOM1_457-472_output	2client	WT	unknown	AAIAECEEVRRKSELF	rank_007	0.79	C-D	0.987727	D	A,2-9	AIAECEEV	40.795	6.638	11.067		postGMF-runs\1client\WT_analysis\more_scans\GCOM1\GCOM1_457-472_output	1client	WT	unknown	AAIAECEEVRRKSELF	rank_005	0.82	B-C	0.975417	B	A,3-10	IAECEEVR	30.642	9.816	12.668
postGMF-runs\2client\WT_analysis\more_scans\GCOM1\GCOM1_457-472_output	2client	WT	unknown	AAIAECEEVRRKSELF	rank_012	0.79	C-D	0.984583	C	A,2-9	AIAECEEV	40.344	6.618	12.107		postGMF-runs\1client\WT_analysis\more_scans\GCOM1\GCOM1_457-472_output	1client	WT	unknown	AAIAECEEVRRKSELF	rank_008	0.82	B-C	0.992692	C	A,3-10	IAECEEVR	30.261	10.39	13.454
postGMF-runs\2client\WT_analysis\more_scans\GCOM1\GCOM1_457-472_output	2client	WT	unknown	AAIAECEEVRRKSELF	rank_012	0.79	C-D	0.984583	D	B,1-8	AAIAECEE	39.251	6.723	11.909		postGMF-runs\1client\WT_analysis\more_scans\GCOM1\GCOM1_457-472_output	1client	WT	unknown	AAIAECEEVRRKSELF	rank_008	0.82	B-C	0.992692	C	A,3-10	IAECEEVR	30.261	10.39	13.454
postGMF-runs\2client\WT_analysis\more_scans\GCOM1\GCOM1_457-472_output	2client	WT	unknown	AAIAECEEVRRKSELF	rank_021	0.78	C-D	0.998182	C	A,2-9	AIAECEEV	40.229	7.293	11.878		postGMF-runs\1client\WT_analysis\more_scans\GCOM1\GCOM1_457-472_output	1client	WT	unknown	AAIAECEEVRRKSELF	rank_007	0.82	B-C	0.98	B	A,3-10	IAECEEVR	30.074	10.386	13.736
postGMF-runs\2client\WT_analysis\more_scans\GCOM1\GCOM1_457-472_output	2client	WT	unknown	AAIAECEEVRRKSELF	rank_021	0.78	C-D	0.998182	D	B,2-9	AIAECEEV	36.637	7.851	12.382		postGMF-runs\1client\WT_analysis\more_scans\GCOM1\GCOM1_457-472_output	1client	WT	unknown	AAIAECEEVRRKSELF	rank_007	0.82	B-C	0.98	B	A,3-10	IAECEEVR	30.074	10.386	13.736
postGMF-runs\2client\WT_analysis\more_scans\GCOM1\GCOM1_457-472_output	2client	WT	unknown	AAIAECEEVRRKSELF	rank_008	0.79	C-D	0.948182	C	B,2-9	AIAECEEV	39.844	7.497	11.356		postGMF-runs\1client\WT_analysis\more_scans\GCOM1\GCOM1_457-472_output	1client	WT	unknown	AAIAECEEVRRKSELF	rank_010	0.82	B-C	1.01091	C	A,3-10	IAECEEVR	29.464	10.243	12.981
postGMF-runs\2client\WT_analysis\more_scans\GCOM1\GCOM1_457-472_output	2client	WT	unknown	AAIAECEEVRRKSELF	rank_008	0.79	C-D	0.948182	D	A,2-9	AIAECEEV	39.341	6.896	11.254		postGMF-runs\1client\WT_analysis\more_scans\GCOM1\GCOM1_457-472_output	1client	WT	unknown	AAIAECEEVRRKSELF	rank_010	0.82	B-C	1.01091	C	A,3-10	IAECEEVR	29.464	10.243	12.981
postGMF-runs\2client\WT_analysis\more_scans\GCOM1\GCOM1_457-472_output	2client	WT	unknown	AAIAECEEVRRKSELF	rank_023	0.78	C-D	1.01045	D	A,2-9	AIAECEEV	37.94	7.697	12.173		postGMF-runs\1client\WT_analysis\more_scans\GCOM1\GCOM1_457-472_output	1client	WT	unknown	AAIAECEEVRRKSELF	rank_019	0.81	B-C	1.03273	B	A,2-9	AIAECEEV	28.456	12.096	14.354
postGMF-runs\2client\WT_analysis\more_scans\GCOM1\GCOM1_457-472_output	2client	WT	unknown	AAIAECEEVRRKSELF	rank_023	0.78	C-D	1.01045	C	B,2-9	AIAECEEV	34.593	8.207	12.718		postGMF-runs\1client\WT_analysis\more_scans\GCOM1\GCOM1_457-472_output	1client	WT	unknown	AAIAECEEVRRKSELF	rank_019	0.81	B-C	1.03273	B	A,2-9	AIAECEEV	28.456	12.096	14.354
postGMF-runs\2client\WT_analysis\more_scans\GCOM1\GCOM1_457-472_output	2client	WT	unknown	AAIAECEEVRRKSELF	rank_018	0.78	C-D	0.972917	C	B,1-8	AAIAECEE	37.839	7.459	11.925		postGMF-runs\1client\WT_analysis\more_scans\GCOM1\GCOM1_457-472_output	1client	WT	unknown	AAIAECEEVRRKSELF	rank_009	0.82	B-C	0.980417	B	A,4-11	AECEEVRR	27.928	11.323	14.592
postGMF-runs\2client\WT_analysis\more_scans\GCOM1\GCOM1_457-472_output	2client	WT	unknown	AAIAECEEVRRKSELF	rank_018	0.78	C-D	0.972917	D	A,1-8	AAIAECEE	37.711	7.444	11.952		postGMF-runs\1client\WT_analysis\more_scans\GCOM1\GCOM1_457-472_output	1client	WT	unknown	AAIAECEEVRRKSELF	rank_009	0.82	B-C	0.980417	B	A,4-11	AECEEVRR	27.928	11.323	14.592
postGMF-runs\2client\WT_analysis\more_scans\GCOM1\GCOM1_457-472_output	2client	WT	unknown	AAIAECEEVRRKSELF	rank_014	0.79	C-D	0.954615	D	B,3-10	IAECEEVR	37.528	7.298	12.177		postGMF-runs\1client\WT_analysis\more_scans\GCOM1\GCOM1_457-472_output	1client	WT	unknown	AAIAECEEVRRKSELF	rank_017	0.81	B-C	0.997917	B	A,9-16	VRRKSELF	26.17	15.595	17.943
postGMF-runs\2client\WT_analysis\more_scans\GCOM1\GCOM1_457-472_output	2client	WT	unknown	AAIAECEEVRRKSELF	rank_014	0.79	C-D	0.954615	C	A,2-9	AIAECEEV	35.129	7.429	12.147		postGMF-runs\1client\WT_analysis\more_scans\GCOM1\GCOM1_457-472_output	1client	WT	unknown	AAIAECEEVRRKSELF	rank_017	0.81	B-C	0.997917	B	A,9-16	VRRKSELF	26.17	15.595	17.943
postGMF-runs\2client\WT_analysis\more_scans\GCOM1\GCOM1_457-472_output	2client	WT	unknown	AAIAECEEVRRKSELF	rank_015	0.79	C-D	0.995909	D	B,3-10	IAECEEVR	37.384	7.308	12.02		postGMF-runs\1client\WT_analysis\more_scans\GCOM1\GCOM1_457-472_output	1client	WT	unknown	AAIAECEEVRRKSELF	rank_016	0.81	B-C	1.03136	C	A,4-11	AECEEVRR	25.086	11.146	14.018
postGMF-runs\2client\WT_analysis\more_scans\GCOM1\GCOM1_457-472_output	2client	WT	unknown	AAIAECEEVRRKSELF	rank_015	0.79	C-D	0.995909	C	A,3-10	IAECEEVR	35.084	7.888	12.557		postGMF-runs\1client\WT_analysis\more_scans\GCOM1\GCOM1_457-472_output	1client	WT	unknown	AAIAECEEVRRKSELF	rank_016	0.81	B-C	1.03136	C	A,4-11	AECEEVRR	25.086	11.146	14.018
postGMF-runs\2client\WT_analysis\more_scans\GCOM1\GCOM1_457-472_output	2client	WT	unknown	AAIAECEEVRRKSELF	rank_010	0.79	C-D	0.953077	C	B,3-10	IAECEEVR	37.382	7.352	12.247		postGMF-runs\1client\WT_analysis\more_scans\GCOM1\GCOM1_457-472_output	1client	WT	unknown	AAIAECEEVRRKSELF	rank_014	0.82	B-C	0.974583	C	A,3-10	IAECEEVR	24.931	11.807	14.99
postGMF-runs\2client\WT_analysis\more_scans\GCOM1\GCOM1_457-472_output	2client	WT	unknown	AAIAECEEVRRKSELF	rank_010	0.79	C-D	0.953077	D	A,2-9	AIAECEEV	36.8	7.699	12.633		postGMF-runs\1client\WT_analysis\more_scans\GCOM1\GCOM1_457-472_output	1client	WT	unknown	AAIAECEEVRRKSELF	rank_014	0.82	B-C	0.974583	C	A,3-10	IAECEEVR	24.931	11.807	14.99
postGMF-runs\2client\WT_analysis\more_scans\GCOM1\GCOM1_457-472_output	2client	WT	unknown	AAIAECEEVRRKSELF	rank_017	0.78	C-D	0.973182	C	A,3-10	IAECEEVR	36.976	7.716	13.053		postGMF-runs\1client\WT_analysis\more_scans\GCOM1\GCOM1_457-472_output	1client	WT	unknown	AAIAECEEVRRKSELF	rank_015	0.81	B-C	0.973182	C	A,2-9	AIAECEEV	24.922	11.128	14.457
postGMF-runs\2client\WT_analysis\more_scans\GCOM1\GCOM1_457-472_output	2client	WT	unknown	AAIAECEEVRRKSELF	rank_017	0.78	C-D	0.973182	D	B,2-9	AIAECEEV	33.629	7.414	12.727		postGMF-runs\1client\WT_analysis\more_scans\GCOM1\GCOM1_457-472_output	1client	WT	unknown	AAIAECEEVRRKSELF	rank_015	0.81	B-C	0.973182	C	A,2-9	AIAECEEV	24.922	11.128	14.457
postGMF-runs\2client\WT_analysis\more_scans\GCOM1\GCOM1_457-472_output	2client	WT	unknown	AAIAECEEVRRKSELF	rank_013	0.79	C-D	0.953462	D	A,3-10	IAECEEVR	36.949	7.299	12.025		postGMF-runs\1client\WT_analysis\more_scans\GCOM1\GCOM1_457-472_output	1client	WT	unknown	AAIAECEEVRRKSELF	rank_013	0.82	B-C	0.980455	C	A,3-10	IAECEEVR	24.887	11.532	14.874
postGMF-runs\2client\WT_analysis\more_scans\GCOM1\GCOM1_457-472_output	2client	WT	unknown	AAIAECEEVRRKSELF	rank_013	0.79	C-D	0.953462	C	B,3-10	IAECEEVR	36.745	7.397	12.101		postGMF-runs\1client\WT_analysis\more_scans\GCOM1\GCOM1_457-472_output	1client	WT	unknown	AAIAECEEVRRKSELF	rank_013	0.82	B-C	0.980455	C	A,3-10	IAECEEVR	24.887	11.532	14.874
postGMF-runs\2client\WT_analysis\more_scans\GCOM1\GCOM1_457-472_output	2client	WT	unknown	AAIAECEEVRRKSELF	rank_025	0.77	C-D	0.962727	C	B,2-9	AIAECEEV	36.02	8.973	13.13		postGMF-runs\1client\WT_analysis\more_scans\GCOM1\GCOM1_457-472_output	1client	WT	unknown	AAIAECEEVRRKSELF	rank_011	0.82	B-C	0.967727	C	A,3-10	IAECEEVR	24.887	11.359	14.808
postGMF-runs\2client\WT_analysis\more_scans\GCOM1\GCOM1_457-472_output	2client	WT	unknown	AAIAECEEVRRKSELF	rank_025	0.77	C-D	0.962727	D	A,2-9	AIAECEEV	35.431	8.968	13.124		postGMF-runs\1client\WT_analysis\more_scans\GCOM1\GCOM1_457-472_output	1client	WT	unknown	AAIAECEEVRRKSELF	rank_011	0.82	B-C	0.967727	C	A,3-10	IAECEEVR	24.887	11.359	14.808
postGMF-runs\2client\WT_analysis\more_scans\GCOM1\GCOM1_457-472_output	2client	WT	unknown	AAIAECEEVRRKSELF	rank_016	0.79	C-D	0.946818	D	A,2-9	AIAECEEV	36.002	7.176	11.822		postGMF-runs\1client\WT_analysis\more_scans\GCOM1\GCOM1_457-472_output	1client	WT	unknown	AAIAECEEVRRKSELF	rank_018	0.81	B-C	1.01455	C	A,4-11	AECEEVRR	24.804	11.651	14.503
postGMF-runs\2client\WT_analysis\more_scans\GCOM1\GCOM1_457-472_output	2client	WT	unknown	AAIAECEEVRRKSELF	rank_016	0.79	C-D	0.946818	C	B,2-9	AIAECEEV	33.354	7.834	12.646		postGMF-runs\1client\WT_analysis\more_scans\GCOM1\GCOM1_457-472_output	1client	WT	unknown	AAIAECEEVRRKSELF	rank_018	0.81	B-C	1.01455	C	A,4-11	AECEEVRR	24.804	11.651	14.503
postGMF-runs\2client\WT_analysis\more_scans\GCOM1\GCOM1_457-472_output	2client	WT	unknown	AAIAECEEVRRKSELF	rank_006	0.79	C-D	0.952273	D	B,4-11	AECEEVRR	35.166	7.083	12.552		postGMF-runs\1client\WT_analysis\more_scans\GCOM1\GCOM1_457-472_output	1client	WT	unknown	AAIAECEEVRRKSELF	rank_021	0.81	B-C	1.00962	B	A,2-9	AIAECEEV	23.991	13.346	17.482
postGMF-runs\2client\WT_analysis\more_scans\GCOM1\GCOM1_457-472_output	2client	WT	unknown	AAIAECEEVRRKSELF	rank_006	0.79	C-D	0.952273	C	A,4-11	AECEEVRR	33.651	7.395	12.875		postGMF-runs\1client\WT_analysis\more_scans\GCOM1\GCOM1_457-472_output	1client	WT	unknown	AAIAECEEVRRKSELF	rank_021	0.81	B-C	1.00962	B	A,2-9	AIAECEEV	23.991	13.346	17.482
postGMF-runs\2client\WT_analysis\more_scans\GCOM1\GCOM1_457-472_output	2client	WT	unknown	AAIAECEEVRRKSELF	rank_024	0.77	C-D	0.971818	D	B,2-9	AIAECEEV	34.482	8.256	12.842		postGMF-runs\1client\WT_analysis\more_scans\GCOM1\GCOM1_457-472_output	1client	WT	unknown	AAIAECEEVRRKSELF	rank_023	0.81	B-C	0.999091	B	A,2-9	AIAECEEV	23.961	11.883	14.81
postGMF-runs\2client\WT_analysis\more_scans\GCOM1\GCOM1_457-472_output	2client	WT	unknown	AAIAECEEVRRKSELF	rank_024	0.77	C-D	0.971818	C	A,2-9	AIAECEEV	32.474	8.277	13.065		postGMF-runs\1client\WT_analysis\more_scans\GCOM1\GCOM1_457-472_output	1client	WT	unknown	AAIAECEEVRRKSELF	rank_023	0.81	B-C	0.999091	B	A,2-9	AIAECEEV	23.961	11.883	14.81
postGMF-runs\2client\WT_analysis\more_scans\GCOM1\GCOM1_457-472_output	2client	WT	unknown	AAIAECEEVRRKSELF	rank_011	0.79	C-D	0.934545	D	A,2-9	AIAECEEV	33.618	7.902	12.821		postGMF-runs\1client\WT_analysis\more_scans\GCOM1\GCOM1_457-472_output	1client	WT	unknown	AAIAECEEVRRKSELF	rank_020	0.81	B-C	0.991364	C	A,2-9	AIAECEEV	22.511	13.092	17.06
postGMF-runs\2client\WT_analysis\more_scans\GCOM1\GCOM1_457-472_output	2client	WT	unknown	AAIAECEEVRRKSELF	rank_011	0.79	C-D	0.934545	C	B,2-9	AIAECEEV	33.338	7.856	12.808		postGMF-runs\1client\WT_analysis\more_scans\GCOM1\GCOM1_457-472_output	1client	WT	unknown	AAIAECEEVRRKSELF	rank_020	0.81	B-C	0.991364	C	A,2-9	AIAECEEV	22.511	13.092	17.06
postGMF-runs\2client\WT_analysis\more_scans\GCOM1\GCOM1_457-472_output	2client	WT	unknown	AAIAECEEVRRKSELF	rank_019	0.78	C-D	0.952727	C	A,3-10	IAECEEVR	32.68	7.842	12.925		postGMF-runs\1client\WT_analysis\more_scans\GCOM1\GCOM1_457-472_output	1client	WT	unknown	AAIAECEEVRRKSELF	rank_025	0.8	B-C	1.02333	B	A,3-10	IAECEEVR	21.252	12.68	16.856
postGMF-runs\2client\WT_analysis\more_scans\GCOM1\GCOM1_457-472_output	2client	WT	unknown	AAIAECEEVRRKSELF	rank_019	0.78	C-D	0.952727	D	B,2-9	AIAECEEV	32.079	8.1	13.248		postGMF-runs\1client\WT_analysis\more_scans\GCOM1\GCOM1_457-472_output	1client	WT	unknown	AAIAECEEVRRKSELF	rank_025	0.8	B-C	1.02333	B	A,3-10	IAECEEVR	21.252	12.68	16.856
postGMF-runs\2client\WT_analysis\more_scans\GCOM1\GCOM1_457-472_output	2client	WT	unknown	AAIAECEEVRRKSELF	rank_022	0.78	C-D	0.946818	D	B,2-9	AIAECEEV	32.473	8.423	12.913
postGMF-runs\2client\WT_analysis\more_scans\GCOM1\GCOM1_457-472_output	2client	WT	unknown	AAIAECEEVRRKSELF	rank_022	0.78	C-D	0.946818	C	A,2-9	AIAECEEV	32.364	8.407	12.896
postGMF-runs\2client\WT_analysis\more_scans\GCOM1\GCOM1_457-472_output	2client	WT	unknown	AAIAECEEVRRKSELF	rank_020	0.78	C-D	0.94	C	A,3-10	IAECEEVR	31.833	8.106	13.139
postGMF-runs\2client\WT_analysis\more_scans\GCOM1\GCOM1_457-472_output	2client	WT	unknown	AAIAECEEVRRKSELF	rank_020	0.78	C-D	0.94	D	B,3-10	IAECEEVR	31.246	8.132	13.282
postGMF-runs\2client\WT_analysis\more_scans\CIZ1\CIZ1_833-848_output	2client	WT	unknown	AAKNPSPTTRPVSRRC	rank_002	0.81	C-D	1.01462	C	B,3-10	KNPSPTTR	64.662	4.808	8.844		postGMF-runs\1client\WT_analysis\more_scans\CIZ1\CIZ1_833-848_output	1client	WT	unknown	AAKNPSPTTRPVSRRC	rank_001	0.83	B-C	0.990455	C	A,2-9	AKNPSPTT	40.854	8.672	12.519
postGMF-runs\2client\WT_analysis\more_scans\CIZ1\CIZ1_833-848_output	2client	WT	unknown	AAKNPSPTTRPVSRRC	rank_002	0.81	C-D	1.01462	D	A,3-10	KNPSPTTR	55.862	5.961	10.269		postGMF-runs\1client\WT_analysis\more_scans\CIZ1\CIZ1_833-848_output	1client	WT	unknown	AAKNPSPTTRPVSRRC	rank_001	0.83	B-C	0.990455	C	A,2-9	AKNPSPTT	40.854	8.672	12.519
postGMF-runs\2client\WT_analysis\more_scans\CIZ1\CIZ1_833-848_output	2client	WT	unknown	AAKNPSPTTRPVSRRC	rank_013	0.79	C-D	0.98	C	B,3-10	KNPSPTTR	48.554	6.099	10.827		postGMF-runs\1client\WT_analysis\more_scans\CIZ1\CIZ1_833-848_output	1client	WT	unknown	AAKNPSPTTRPVSRRC	rank_015	0.82	B-C	1.09	C	A,2-9	AKNPSPTT	40.219	7.78	12.29
postGMF-runs\2client\WT_analysis\more_scans\CIZ1\CIZ1_833-848_output	2client	WT	unknown	AAKNPSPTTRPVSRRC	rank_013	0.79	C-D	0.98	D	A,3-10	KNPSPTTR	46.762	6.21	11.097		postGMF-runs\1client\WT_analysis\more_scans\CIZ1\CIZ1_833-848_output	1client	WT	unknown	AAKNPSPTTRPVSRRC	rank_015	0.82	B-C	1.09	C	A,2-9	AKNPSPTT	40.219	7.78	12.29
postGMF-runs\2client\WT_analysis\more_scans\CIZ1\CIZ1_833-848_output	2client	WT	unknown	AAKNPSPTTRPVSRRC	rank_005	0.8	C-D	1.02727	C	B,3-10	KNPSPTTR	48.204	5.553	10.827		postGMF-runs\1client\WT_analysis\more_scans\CIZ1\CIZ1_833-848_output	1client	WT	unknown	AAKNPSPTTRPVSRRC	rank_017	0.81	B-C	1.03273	C	A,3-10	KNPSPTTR	38.164	10.491	13.033
postGMF-runs\2client\WT_analysis\more_scans\CIZ1\CIZ1_833-848_output	2client	WT	unknown	AAKNPSPTTRPVSRRC	rank_005	0.8	C-D	1.02727	D	A,3-10	KNPSPTTR	47.546	5.672	10.973		postGMF-runs\1client\WT_analysis\more_scans\CIZ1\CIZ1_833-848_output	1client	WT	unknown	AAKNPSPTTRPVSRRC	rank_017	0.81	B-C	1.03273	C	A,3-10	KNPSPTTR	38.164	10.491	13.033
postGMF-runs\2client\WT_analysis\more_scans\CIZ1\CIZ1_833-848_output	2client	WT	unknown	AAKNPSPTTRPVSRRC	rank_001	0.82	C-D	1.02273	D	A,4-11	NPSPTTRP	47.829	4.804	9.651		postGMF-runs\1client\WT_analysis\more_scans\CIZ1\CIZ1_833-848_output	1client	WT	unknown	AAKNPSPTTRPVSRRC	rank_004	0.82	B-C	0.987917	B	A,2-9	AKNPSPTT	35.073	9.795	13.341
postGMF-runs\2client\WT_analysis\more_scans\CIZ1\CIZ1_833-848_output	2client	WT	unknown	AAKNPSPTTRPVSRRC	rank_001	0.82	C-D	1.02273	C	B,4-11	NPSPTTRP	47.004	4.894	9.755		postGMF-runs\1client\WT_analysis\more_scans\CIZ1\CIZ1_833-848_output	1client	WT	unknown	AAKNPSPTTRPVSRRC	rank_004	0.82	B-C	0.987917	B	A,2-9	AKNPSPTT	35.073	9.795	13.341
postGMF-runs\2client\WT_analysis\more_scans\CIZ1\CIZ1_833-848_output	2client	WT	unknown	AAKNPSPTTRPVSRRC	rank_016	0.78	C-D	1.02364	C	B,2-9	AKNPSPTT	47	6.647	11.649		postGMF-runs\1client\WT_analysis\more_scans\CIZ1\CIZ1_833-848_output	1client	WT	unknown	AAKNPSPTTRPVSRRC	rank_007	0.82	B-C	1.02909	C	A,3-10	KNPSPTTR	34.34	8.408	13.228
postGMF-runs\2client\WT_analysis\more_scans\CIZ1\CIZ1_833-848_output	2client	WT	unknown	AAKNPSPTTRPVSRRC	rank_016	0.78	C-D	1.02364	D	A,2-9	AKNPSPTT	45.711	6.82	11.782		postGMF-runs\1client\WT_analysis\more_scans\CIZ1\CIZ1_833-848_output	1client	WT	unknown	AAKNPSPTTRPVSRRC	rank_007	0.82	B-C	1.02909	C	A,3-10	KNPSPTTR	34.34	8.408	13.228
postGMF-runs\2client\WT_analysis\more_scans\CIZ1\CIZ1_833-848_output	2client	WT	unknown	AAKNPSPTTRPVSRRC	rank_004	0.81	C-D	1.03636	D	B,3-10	KNPSPTTR	46.356	5.19	10.372		postGMF-runs\1client\WT_analysis\more_scans\CIZ1\CIZ1_833-848_output	1client	WT	unknown	AAKNPSPTTRPVSRRC	rank_003	0.82	B-C	0.975	C	A,3-10	KNPSPTTR	33.619	9.122	12.65
postGMF-runs\2client\WT_analysis\more_scans\CIZ1\CIZ1_833-848_output	2client	WT	unknown	AAKNPSPTTRPVSRRC	rank_004	0.81	C-D	1.03636	C	A,3-10	KNPSPTTR	45.704	5.233	10.416		postGMF-runs\1client\WT_analysis\more_scans\CIZ1\CIZ1_833-848_output	1client	WT	unknown	AAKNPSPTTRPVSRRC	rank_003	0.82	B-C	0.975	C	A,3-10	KNPSPTTR	33.619	9.122	12.65
postGMF-runs\2client\WT_analysis\more_scans\CIZ1\CIZ1_833-848_output	2client	WT	unknown	AAKNPSPTTRPVSRRC	rank_003	0.81	C-D	1.02182	D	B,3-10	KNPSPTTR	46.16	5.101	10.134		postGMF-runs\1client\WT_analysis\more_scans\CIZ1\CIZ1_833-848_output	1client	WT	unknown	AAKNPSPTTRPVSRRC	rank_002	0.82	B-C	0.979091	B	A,3-10	KNPSPTTR	32.881	9.029	12.496
postGMF-runs\2client\WT_analysis\more_scans\CIZ1\CIZ1_833-848_output	2client	WT	unknown	AAKNPSPTTRPVSRRC	rank_003	0.81	C-D	1.02182	C	A,3-10	KNPSPTTR	45.842	5.163	10.137		postGMF-runs\1client\WT_analysis\more_scans\CIZ1\CIZ1_833-848_output	1client	WT	unknown	AAKNPSPTTRPVSRRC	rank_002	0.82	B-C	0.979091	B	A,3-10	KNPSPTTR	32.881	9.029	12.496
postGMF-runs\2client\WT_analysis\more_scans\CIZ1\CIZ1_833-848_output	2client	WT	unknown	AAKNPSPTTRPVSRRC	rank_015	0.78	C-D	1.19308	D	A,1-8	AAKNPSPT	45.757	5.328	10.9		postGMF-runs\1client\WT_analysis\more_scans\CIZ1\CIZ1_833-848_output	1client	WT	unknown	AAKNPSPTTRPVSRRC	rank_006	0.82	B-C	0.991364	B	A,2-9	AKNPSPTT	32.81	8.651	13.624
postGMF-runs\2client\WT_analysis\more_scans\CIZ1\CIZ1_833-848_output	2client	WT	unknown	AAKNPSPTTRPVSRRC	rank_015	0.78	C-D	1.19308	C	B,1-8	AAKNPSPT	43.709	5.74	11.3		postGMF-runs\1client\WT_analysis\more_scans\CIZ1\CIZ1_833-848_output	1client	WT	unknown	AAKNPSPTTRPVSRRC	rank_006	0.82	B-C	0.991364	B	A,2-9	AKNPSPTT	32.81	8.651	13.624
postGMF-runs\2client\WT_analysis\more_scans\CIZ1\CIZ1_833-848_output	2client	WT	unknown	AAKNPSPTTRPVSRRC	rank_008	0.8	C-D	0.976818	D	B,3-10	KNPSPTTR	45.348	5.705	10.915		postGMF-runs\1client\WT_analysis\more_scans\CIZ1\CIZ1_833-848_output	1client	WT	unknown	AAKNPSPTTRPVSRRC	rank_020	0.81	B-C	1.01136	C	A,2-9	AKNPSPTT	32.616	10.923	13.902
postGMF-runs\2client\WT_analysis\more_scans\CIZ1\CIZ1_833-848_output	2client	WT	unknown	AAKNPSPTTRPVSRRC	rank_008	0.8	C-D	0.976818	C	A,3-10	KNPSPTTR	42.077	5.967	11.321		postGMF-runs\1client\WT_analysis\more_scans\CIZ1\CIZ1_833-848_output	1client	WT	unknown	AAKNPSPTTRPVSRRC	rank_020	0.81	B-C	1.01136	C	A,2-9	AKNPSPTT	32.616	10.923	13.902
postGMF-runs\2client\WT_analysis\more_scans\CIZ1\CIZ1_833-848_output	2client	WT	unknown	AAKNPSPTTRPVSRRC	rank_021	0.78	C-D	0.9945	D	A,3-10	KNPSPTTR	44.821	6.955	11.728		postGMF-runs\1client\WT_analysis\more_scans\CIZ1\CIZ1_833-848_output	1client	WT	unknown	AAKNPSPTTRPVSRRC	rank_023	0.81	B-C	1.07182	C	A,3-10	KNPSPTTR	32.52	9.37	13.479
postGMF-runs\2client\WT_analysis\more_scans\CIZ1\CIZ1_833-848_output	2client	WT	unknown	AAKNPSPTTRPVSRRC	rank_021	0.78	C-D	0.9945	C	B,2-9	AKNPSPTT	41.8	6.891	11.652		postGMF-runs\1client\WT_analysis\more_scans\CIZ1\CIZ1_833-848_output	1client	WT	unknown	AAKNPSPTTRPVSRRC	rank_023	0.81	B-C	1.07182	C	A,3-10	KNPSPTTR	32.52	9.37	13.479
postGMF-runs\2client\WT_analysis\more_scans\CIZ1\CIZ1_833-848_output	2client	WT	unknown	AAKNPSPTTRPVSRRC	rank_006	0.8	C-D	0.990417	D	B,3-10	KNPSPTTR	44.6	5.586	11.406		postGMF-runs\1client\WT_analysis\more_scans\CIZ1\CIZ1_833-848_output	1client	WT	unknown	AAKNPSPTTRPVSRRC	rank_008	0.82	B-C	1.01727	C	A,2-9	AKNPSPTT	32.206	8.732	13.44
postGMF-runs\2client\WT_analysis\more_scans\CIZ1\CIZ1_833-848_output	2client	WT	unknown	AAKNPSPTTRPVSRRC	rank_006	0.8	C-D	0.990417	C	A,3-10	KNPSPTTR	43.416	5.757	11.616		postGMF-runs\1client\WT_analysis\more_scans\CIZ1\CIZ1_833-848_output	1client	WT	unknown	AAKNPSPTTRPVSRRC	rank_008	0.82	B-C	1.01727	C	A,2-9	AKNPSPTT	32.206	8.732	13.44
postGMF-runs\2client\WT_analysis\more_scans\CIZ1\CIZ1_833-848_output	2client	WT	unknown	AAKNPSPTTRPVSRRC	rank_024	0.78	C-D	1.16154	D	A,2-9	AKNPSPTT	43.66	5.724	11.823		postGMF-runs\1client\WT_analysis\more_scans\CIZ1\CIZ1_833-848_output	1client	WT	unknown	AAKNPSPTTRPVSRRC	rank_005	0.82	B-C	0.982273	B	A,2-9	AKNPSPTT	31.652	9.215	13.914
postGMF-runs\2client\WT_analysis\more_scans\CIZ1\CIZ1_833-848_output	2client	WT	unknown	AAKNPSPTTRPVSRRC	rank_024	0.78	C-D	1.16154	C	B,2-9	AKNPSPTT	39.586	6.173	12.266		postGMF-runs\1client\WT_analysis\more_scans\CIZ1\CIZ1_833-848_output	1client	WT	unknown	AAKNPSPTTRPVSRRC	rank_005	0.82	B-C	0.982273	B	A,2-9	AKNPSPTT	31.652	9.215	13.914
postGMF-runs\2client\WT_analysis\more_scans\CIZ1\CIZ1_833-848_output	2client	WT	unknown	AAKNPSPTTRPVSRRC	rank_007	0.8	C-D	1.02864	D	A,4-11	NPSPTTRP	43.095	5.69	10.722		postGMF-runs\1client\WT_analysis\more_scans\CIZ1\CIZ1_833-848_output	1client	WT	unknown	AAKNPSPTTRPVSRRC	rank_018	0.81	B-C	1.06182	C	A,2-9	AKNPSPTT	31.54	9.083	13.346
postGMF-runs\2client\WT_analysis\more_scans\CIZ1\CIZ1_833-848_output	2client	WT	unknown	AAKNPSPTTRPVSRRC	rank_007	0.8	C-D	1.02864	C	B,4-11	NPSPTTRP	42.978	5.712	10.843		postGMF-runs\1client\WT_analysis\more_scans\CIZ1\CIZ1_833-848_output	1client	WT	unknown	AAKNPSPTTRPVSRRC	rank_018	0.81	B-C	1.06182	C	A,2-9	AKNPSPTT	31.54	9.083	13.346
postGMF-runs\2client\WT_analysis\more_scans\CIZ1\CIZ1_833-848_output	2client	WT	unknown	AAKNPSPTTRPVSRRC	rank_022	0.78	C-D	1.17423	C	A,2-9	AKNPSPTT	43.056	5.788	11.658		postGMF-runs\1client\WT_analysis\more_scans\CIZ1\CIZ1_833-848_output	1client	WT	unknown	AAKNPSPTTRPVSRRC	rank_013	0.82	B-C	1.01136	C	A,3-10	KNPSPTTR	31.154	9.429	13.861
postGMF-runs\2client\WT_analysis\more_scans\CIZ1\CIZ1_833-848_output	2client	WT	unknown	AAKNPSPTTRPVSRRC	rank_022	0.78	C-D	1.17423	D	B,2-9	AKNPSPTT	41.464	6.044	11.845		postGMF-runs\1client\WT_analysis\more_scans\CIZ1\CIZ1_833-848_output	1client	WT	unknown	AAKNPSPTTRPVSRRC	rank_013	0.82	B-C	1.01136	C	A,3-10	KNPSPTTR	31.154	9.429	13.861
postGMF-runs\2client\WT_analysis\more_scans\CIZ1\CIZ1_833-848_output	2client	WT	unknown	AAKNPSPTTRPVSRRC	rank_009	0.79	C-D	0.970455	C	A,3-10	KNPSPTTR	42.823	6.225	11.392		postGMF-runs\1client\WT_analysis\more_scans\CIZ1\CIZ1_833-848_output	1client	WT	unknown	AAKNPSPTTRPVSRRC	rank_010	0.82	B-C	0.968182	C	A,2-9	AKNPSPTT	30.302	11.942	14.85
postGMF-runs\2client\WT_analysis\more_scans\CIZ1\CIZ1_833-848_output	2client	WT	unknown	AAKNPSPTTRPVSRRC	rank_009	0.79	C-D	0.970455	D	B,3-10	KNPSPTTR	39.339	6.638	11.862		postGMF-runs\1client\WT_analysis\more_scans\CIZ1\CIZ1_833-848_output	1client	WT	unknown	AAKNPSPTTRPVSRRC	rank_010	0.82	B-C	0.968182	C	A,2-9	AKNPSPTT	30.302	11.942	14.85
postGMF-runs\2client\WT_analysis\more_scans\CIZ1\CIZ1_833-848_output	2client	WT	unknown	AAKNPSPTTRPVSRRC	rank_017	0.78	C-D	1.15346	D	B,2-9	AKNPSPTT	42.091	5.666	11.45		postGMF-runs\1client\WT_analysis\more_scans\CIZ1\CIZ1_833-848_output	1client	WT	unknown	AAKNPSPTTRPVSRRC	rank_022	0.81	B-C	1.06955	B	A,3-10	KNPSPTTR	29.754	10.504	14.275
postGMF-runs\2client\WT_analysis\more_scans\CIZ1\CIZ1_833-848_output	2client	WT	unknown	AAKNPSPTTRPVSRRC	rank_017	0.78	C-D	1.15346	C	A,2-9	AKNPSPTT	41.829	5.783	11.602		postGMF-runs\1client\WT_analysis\more_scans\CIZ1\CIZ1_833-848_output	1client	WT	unknown	AAKNPSPTTRPVSRRC	rank_022	0.81	B-C	1.06955	B	A,3-10	KNPSPTTR	29.754	10.504	14.275
postGMF-runs\2client\WT_analysis\more_scans\CIZ1\CIZ1_833-848_output	2client	WT	unknown	AAKNPSPTTRPVSRRC	rank_014	0.79	C-D	0.991154	D	B,2-9	AKNPSPTT	41.643	6.437	11.928		postGMF-runs\1client\WT_analysis\more_scans\CIZ1\CIZ1_833-848_output	1client	WT	unknown	AAKNPSPTTRPVSRRC	rank_024	0.8	B-C	1.02636	C	A,3-10	KNPSPTTR	29.549	11.518	14.789
postGMF-runs\2client\WT_analysis\more_scans\CIZ1\CIZ1_833-848_output	2client	WT	unknown	AAKNPSPTTRPVSRRC	rank_014	0.79	C-D	0.991154	C	A,3-10	KNPSPTTR	41.001	6.622	12.222		postGMF-runs\1client\WT_analysis\more_scans\CIZ1\CIZ1_833-848_output	1client	WT	unknown	AAKNPSPTTRPVSRRC	rank_024	0.8	B-C	1.02636	C	A,3-10	KNPSPTTR	29.549	11.518	14.789
postGMF-runs\2client\WT_analysis\more_scans\CIZ1\CIZ1_833-848_output	2client	WT	unknown	AAKNPSPTTRPVSRRC	rank_010	0.79	C-D	0.9755	D	B,3-10	KNPSPTTR	41.281	6.302	11.462		postGMF-runs\1client\WT_analysis\more_scans\CIZ1\CIZ1_833-848_output	1client	WT	unknown	AAKNPSPTTRPVSRRC	rank_021	0.81	B-C	1.0235	B	A,3-10	KNPSPTTR	29.438	10.574	14.095
postGMF-runs\2client\WT_analysis\more_scans\CIZ1\CIZ1_833-848_output	2client	WT	unknown	AAKNPSPTTRPVSRRC	rank_010	0.79	C-D	0.9755	C	A,3-10	KNPSPTTR	41.243	6.318	11.49		postGMF-runs\1client\WT_analysis\more_scans\CIZ1\CIZ1_833-848_output	1client	WT	unknown	AAKNPSPTTRPVSRRC	rank_021	0.81	B-C	1.0235	B	A,3-10	KNPSPTTR	29.438	10.574	14.095
postGMF-runs\2client\WT_analysis\more_scans\CIZ1\CIZ1_833-848_output	2client	WT	unknown	AAKNPSPTTRPVSRRC	rank_012	0.79	C-D	0.99875	C	A,3-10	KNPSPTTR	40.726	6.343	12.228		postGMF-runs\1client\WT_analysis\more_scans\CIZ1\CIZ1_833-848_output	1client	WT	unknown	AAKNPSPTTRPVSRRC	rank_012	0.82	B-C	0.9775	B	A,2-9	AKNPSPTT	29.148	11.896	15.113
postGMF-runs\2client\WT_analysis\more_scans\CIZ1\CIZ1_833-848_output	2client	WT	unknown	AAKNPSPTTRPVSRRC	rank_012	0.79	C-D	0.99875	D	B,3-10	KNPSPTTR	36.231	6.632	12.468		postGMF-runs\1client\WT_analysis\more_scans\CIZ1\CIZ1_833-848_output	1client	WT	unknown	AAKNPSPTTRPVSRRC	rank_012	0.82	B-C	0.9775	B	A,2-9	AKNPSPTT	29.148	11.896	15.113
postGMF-runs\2client\WT_analysis\more_scans\CIZ1\CIZ1_833-848_output	2client	WT	unknown	AAKNPSPTTRPVSRRC	rank_011	0.79	C-D	0.977273	D	B,3-10	KNPSPTTR	40.006	6.12	12.048		postGMF-runs\1client\WT_analysis\more_scans\CIZ1\CIZ1_833-848_output	1client	WT	unknown	AAKNPSPTTRPVSRRC	rank_016	0.82	B-C	0.987727	C	A,2-9	AKNPSPTT	27.994	10.936	14.567
postGMF-runs\2client\WT_analysis\more_scans\CIZ1\CIZ1_833-848_output	2client	WT	unknown	AAKNPSPTTRPVSRRC	rank_011	0.79	C-D	0.977273	C	A,3-10	KNPSPTTR	37.66	6.395	12.29		postGMF-runs\1client\WT_analysis\more_scans\CIZ1\CIZ1_833-848_output	1client	WT	unknown	AAKNPSPTTRPVSRRC	rank_016	0.82	B-C	0.987727	C	A,2-9	AKNPSPTT	27.994	10.936	14.567
postGMF-runs\2client\WT_analysis\more_scans\CIZ1\CIZ1_833-848_output	2client	WT	unknown	AAKNPSPTTRPVSRRC	rank_025	0.77	C-D	1.13808	C	B,2-9	AKNPSPTT	39.578	6.214	12.119		postGMF-runs\1client\WT_analysis\more_scans\CIZ1\CIZ1_833-848_output	1client	WT	unknown	AAKNPSPTTRPVSRRC	rank_014	0.82	B-C	0.988182	B	A,2-9	AKNPSPTT	27.879	11.124	14.573
postGMF-runs\2client\WT_analysis\more_scans\CIZ1\CIZ1_833-848_output	2client	WT	unknown	AAKNPSPTTRPVSRRC	rank_025	0.77	C-D	1.13808	D	A,1-8	AAKNPSPT	38.719	6.211	11.919		postGMF-runs\1client\WT_analysis\more_scans\CIZ1\CIZ1_833-848_output	1client	WT	unknown	AAKNPSPTTRPVSRRC	rank_014	0.82	B-C	0.988182	B	A,2-9	AKNPSPTT	27.879	11.124	14.573
postGMF-runs\2client\WT_analysis\more_scans\CIZ1\CIZ1_833-848_output	2client	WT	unknown	AAKNPSPTTRPVSRRC	rank_018	0.78	C-D	1.005	D	B,3-10	KNPSPTTR	38.364	6.783	12.517		postGMF-runs\1client\WT_analysis\more_scans\CIZ1\CIZ1_833-848_output	1client	WT	unknown	AAKNPSPTTRPVSRRC	rank_011	0.82	B-C	0.98625	B	A,4-11	NPSPTTRP	26.814	11.224	15.39
postGMF-runs\2client\WT_analysis\more_scans\CITFA\CITFA_273-288_output	2client	WT	unknown	AAPEAKSASQKDLEDG	rank_001	0.84	C-D	0.964615	C	A,3-10	PEAKSASQ	51.371	4.29	9.024		postGMF-runs\1client\WT_analysis\more_scans\CITFA\CITFA_273-288_output	1client	WT	unknown	AAPEAKSASQKDLEDG	rank_001	0.86	B-C	0.961538	B	A,3-10	PEAKSASQ	45.064	5.822	10.006
postGMF-runs\2client\WT_analysis\more_scans\CITFA\CITFA_273-288_output	2client	WT	unknown	AAPEAKSASQKDLEDG	rank_001	0.84	C-D	0.964615	D	B,3-10	PEAKSASQ	51.038	4.353	9.118		postGMF-runs\1client\WT_analysis\more_scans\CITFA\CITFA_273-288_output	1client	WT	unknown	AAPEAKSASQKDLEDG	rank_001	0.86	B-C	0.961538	B	A,3-10	PEAKSASQ	45.064	5.822	10.006
postGMF-runs\2client\WT_analysis\more_scans\CITFA\CITFA_273-288_output	2client	WT	unknown	AAPEAKSASQKDLEDG	rank_007	0.81	C-D	1.02318	C	A,3-10	PEAKSASQ	49.214	5.712	10.886		postGMF-runs\1client\WT_analysis\more_scans\CITFA\CITFA_273-288_output	1client	WT	unknown	AAPEAKSASQKDLEDG	rank_002	0.85	B-C	0.972308	C	A,3-10	PEAKSASQ	44.419	5.841	10.021
postGMF-runs\2client\WT_analysis\more_scans\CITFA\CITFA_273-288_output	2client	WT	unknown	AAPEAKSASQKDLEDG	rank_007	0.81	C-D	1.02318	D	B,3-10	PEAKSASQ	48.531	5.734	10.96		postGMF-runs\1client\WT_analysis\more_scans\CITFA\CITFA_273-288_output	1client	WT	unknown	AAPEAKSASQKDLEDG	rank_002	0.85	B-C	0.972308	C	A,3-10	PEAKSASQ	44.419	5.841	10.021
postGMF-runs\2client\WT_analysis\more_scans\CITFA\CITFA_273-288_output	2client	WT	unknown	AAPEAKSASQKDLEDG	rank_017	0.79	C-D	0.955385	C	A,3-10	PEAKSASQ	47.57	6.472	10.865		postGMF-runs\1client\WT_analysis\more_scans\CITFA\CITFA_273-288_output	1client	WT	unknown	AAPEAKSASQKDLEDG	rank_003	0.85	B-C	0.966923	C	A,2-9	APEAKSAS	44.118	5.554	9.859
postGMF-runs\2client\WT_analysis\more_scans\CITFA\CITFA_273-288_output	2client	WT	unknown	AAPEAKSASQKDLEDG	rank_017	0.79	C-D	0.955385	D	B,3-10	PEAKSASQ	38	7.972	12.496		postGMF-runs\1client\WT_analysis\more_scans\CITFA\CITFA_273-288_output	1client	WT	unknown	AAPEAKSASQKDLEDG	rank_003	0.85	B-C	0.966923	C	A,2-9	APEAKSAS	44.118	5.554	9.859
postGMF-runs\2client\WT_analysis\more_scans\CITFA\CITFA_273-288_output	2client	WT	unknown	AAPEAKSASQKDLEDG	rank_006	0.8	C-D	0.969091	D	A,3-10	PEAKSASQ	46.838	5.765	10.467		postGMF-runs\1client\WT_analysis\more_scans\CITFA\CITFA_273-288_output	1client	WT	unknown	AAPEAKSASQKDLEDG	rank_004	0.84	B-C	0.979615	C	A,2-9	APEAKSAS	43.097	5.672	10
postGMF-runs\2client\WT_analysis\more_scans\CITFA\CITFA_273-288_output	2client	WT	unknown	AAPEAKSASQKDLEDG	rank_006	0.8	C-D	0.969091	C	B,3-10	PEAKSASQ	45.007	6.153	10.824		postGMF-runs\1client\WT_analysis\more_scans\CITFA\CITFA_273-288_output	1client	WT	unknown	AAPEAKSASQKDLEDG	rank_004	0.84	B-C	0.979615	C	A,2-9	APEAKSAS	43.097	5.672	10
postGMF-runs\2client\WT_analysis\more_scans\CITFA\CITFA_273-288_output	2client	WT	unknown	AAPEAKSASQKDLEDG	rank_010	0.8	C-D	0.971538	C	B,3-10	PEAKSASQ	46.724	5.762	10.373		postGMF-runs\1client\WT_analysis\more_scans\CITFA\CITFA_273-288_output	1client	WT	unknown	AAPEAKSASQKDLEDG	rank_009	0.83	B-C	0.951667	B	A,3-10	PEAKSASQ	36.87	8.291	12.43
postGMF-runs\2client\WT_analysis\more_scans\CITFA\CITFA_273-288_output	2client	WT	unknown	AAPEAKSASQKDLEDG	rank_010	0.8	C-D	0.971538	D	A,3-10	PEAKSASQ	41.359	7.017	11.703		postGMF-runs\1client\WT_analysis\more_scans\CITFA\CITFA_273-288_output	1client	WT	unknown	AAPEAKSASQKDLEDG	rank_009	0.83	B-C	0.951667	B	A,3-10	PEAKSASQ	36.87	8.291	12.43
postGMF-runs\2client\WT_analysis\more_scans\CITFA\CITFA_273-288_output	2client	WT	unknown	AAPEAKSASQKDLEDG	rank_015	0.79	C-D	0.973636	D	B,3-10	PEAKSASQ	46.256	6.783	11.227		postGMF-runs\1client\WT_analysis\more_scans\CITFA\CITFA_273-288_output	1client	WT	unknown	AAPEAKSASQKDLEDG	rank_011	0.83	B-C	0.977727	C	A,4-11	EAKSASQK	36.746	8.315	11.904
postGMF-runs\2client\WT_analysis\more_scans\CITFA\CITFA_273-288_output	2client	WT	unknown	AAPEAKSASQKDLEDG	rank_015	0.79	C-D	0.973636	C	A,3-10	PEAKSASQ	46.019	6.803	11.256		postGMF-runs\1client\WT_analysis\more_scans\CITFA\CITFA_273-288_output	1client	WT	unknown	AAPEAKSASQKDLEDG	rank_011	0.83	B-C	0.977727	C	A,4-11	EAKSASQK	36.746	8.315	11.904
postGMF-runs\2client\WT_analysis\more_scans\CITFA\CITFA_273-288_output	2client	WT	unknown	AAPEAKSASQKDLEDG	rank_003	0.82	C-D	0.965	D	B,3-10	PEAKSASQ	46.02	5.038	9.795		postGMF-runs\1client\WT_analysis\more_scans\CITFA\CITFA_273-288_output	1client	WT	unknown	AAPEAKSASQKDLEDG	rank_008	0.83	B-C	0.956154	B	A,3-10	PEAKSASQ	36.26	8.509	12.538
postGMF-runs\2client\WT_analysis\more_scans\CITFA\CITFA_273-288_output	2client	WT	unknown	AAPEAKSASQKDLEDG	rank_003	0.82	C-D	0.965	C	A,3-10	PEAKSASQ	45.586	5.152	9.952		postGMF-runs\1client\WT_analysis\more_scans\CITFA\CITFA_273-288_output	1client	WT	unknown	AAPEAKSASQKDLEDG	rank_008	0.83	B-C	0.956154	B	A,3-10	PEAKSASQ	36.26	8.509	12.538
postGMF-runs\2client\WT_analysis\more_scans\CITFA\CITFA_273-288_output	2client	WT	unknown	AAPEAKSASQKDLEDG	rank_002	0.82	C-D	0.989615	C	A,3-10	PEAKSASQ	45.411	4.882	9.713		postGMF-runs\1client\WT_analysis\more_scans\CITFA\CITFA_273-288_output	1client	WT	unknown	AAPEAKSASQKDLEDG	rank_007	0.83	B-C	0.994583	B	A,4-11	EAKSASQK	35.931	8.56	11.27
postGMF-runs\2client\WT_analysis\more_scans\CITFA\CITFA_273-288_output	2client	WT	unknown	AAPEAKSASQKDLEDG	rank_002	0.82	C-D	0.989615	D	B,3-10	PEAKSASQ	44.95	4.965	9.744		postGMF-runs\1client\WT_analysis\more_scans\CITFA\CITFA_273-288_output	1client	WT	unknown	AAPEAKSASQKDLEDG	rank_007	0.83	B-C	0.994583	B	A,4-11	EAKSASQK	35.931	8.56	11.27
postGMF-runs\2client\WT_analysis\more_scans\CITFA\CITFA_273-288_output	2client	WT	unknown	AAPEAKSASQKDLEDG	rank_004	0.82	C-D	0.975	D	A,3-10	PEAKSASQ	44.92	5.098	9.918		postGMF-runs\1client\WT_analysis\more_scans\CITFA\CITFA_273-288_output	1client	WT	unknown	AAPEAKSASQKDLEDG	rank_021	0.82	B-C	1.0435	C	A,3-10	PEAKSASQ	35.731	11.054	11.89
postGMF-runs\2client\WT_analysis\more_scans\CITFA\CITFA_273-288_output	2client	WT	unknown	AAPEAKSASQKDLEDG	rank_004	0.82	C-D	0.975	C	B,3-10	PEAKSASQ	44.441	5.187	10.009		postGMF-runs\1client\WT_analysis\more_scans\CITFA\CITFA_273-288_output	1client	WT	unknown	AAPEAKSASQKDLEDG	rank_021	0.82	B-C	1.0435	C	A,3-10	PEAKSASQ	35.731	11.054	11.89
postGMF-runs\2client\WT_analysis\more_scans\CITFA\CITFA_273-288_output	2client	WT	unknown	AAPEAKSASQKDLEDG	rank_021	0.78	C-D	0.984615	C	B,3-10	PEAKSASQ	44.444	7.445	11.842		postGMF-runs\1client\WT_analysis\more_scans\CITFA\CITFA_273-288_output	1client	WT	unknown	AAPEAKSASQKDLEDG	rank_016	0.83	B-C	0.954583	B	A,3-10	PEAKSASQ	33.78	8.386	12.27
postGMF-runs\2client\WT_analysis\more_scans\CITFA\CITFA_273-288_output	2client	WT	unknown	AAPEAKSASQKDLEDG	rank_021	0.78	C-D	0.984615	D	A,3-10	PEAKSASQ	42.335	7.616	11.971		postGMF-runs\1client\WT_analysis\more_scans\CITFA\CITFA_273-288_output	1client	WT	unknown	AAPEAKSASQKDLEDG	rank_016	0.83	B-C	0.954583	B	A,3-10	PEAKSASQ	33.78	8.386	12.27
postGMF-runs\2client\WT_analysis\more_scans\CITFA\CITFA_273-288_output	2client	WT	unknown	AAPEAKSASQKDLEDG	rank_014	0.79	C-D	1.015	D	A,3-10	PEAKSASQ	43.149	6.371	11.276		postGMF-runs\1client\WT_analysis\more_scans\CITFA\CITFA_273-288_output	1client	WT	unknown	AAPEAKSASQKDLEDG	rank_010	0.83	B-C	0.9925	B	A,3-10	PEAKSASQ	32.094	9.326	12.179
postGMF-runs\2client\WT_analysis\more_scans\CITFA\CITFA_273-288_output	2client	WT	unknown	AAPEAKSASQKDLEDG	rank_014	0.79	C-D	1.015	C	B,3-10	PEAKSASQ	41.778	6.5	11.452		postGMF-runs\1client\WT_analysis\more_scans\CITFA\CITFA_273-288_output	1client	WT	unknown	AAPEAKSASQKDLEDG	rank_010	0.83	B-C	0.9925	B	A,3-10	PEAKSASQ	32.094	9.326	12.179
postGMF-runs\2client\WT_analysis\more_scans\CITFA\CITFA_273-288_output	2client	WT	unknown	AAPEAKSASQKDLEDG	rank_019	0.78	C-D	0.975455	D	B,3-10	PEAKSASQ	42.888	7.052	11.586		postGMF-runs\1client\WT_analysis\more_scans\CITFA\CITFA_273-288_output	1client	WT	unknown	AAPEAKSASQKDLEDG	rank_020	0.82	B-C	0.965833	C	A,3-10	PEAKSASQ	30.632	10.846	13.596
postGMF-runs\2client\WT_analysis\more_scans\CITFA\CITFA_273-288_output	2client	WT	unknown	AAPEAKSASQKDLEDG	rank_019	0.78	C-D	0.975455	C	A,3-10	PEAKSASQ	41.535	7.196	11.744		postGMF-runs\1client\WT_analysis\more_scans\CITFA\CITFA_273-288_output	1client	WT	unknown	AAPEAKSASQKDLEDG	rank_020	0.82	B-C	0.965833	C	A,3-10	PEAKSASQ	30.632	10.846	13.596
postGMF-runs\2client\WT_analysis\more_scans\CITFA\CITFA_273-288_output	2client	WT	unknown	AAPEAKSASQKDLEDG	rank_022	0.78	C-D	0.975	C	A,3-10	PEAKSASQ	42.725	7.94	12.262		postGMF-runs\1client\WT_analysis\more_scans\CITFA\CITFA_273-288_output	1client	WT	unknown	AAPEAKSASQKDLEDG	rank_018	0.82	B-C	0.9575	B	A,3-10	PEAKSASQ	30.23	10.609	13.544
postGMF-runs\2client\WT_analysis\more_scans\CITFA\CITFA_273-288_output	2client	WT	unknown	AAPEAKSASQKDLEDG	rank_022	0.78	C-D	0.975	D	B,3-10	PEAKSASQ	41.823	8.101	12.388		postGMF-runs\1client\WT_analysis\more_scans\CITFA\CITFA_273-288_output	1client	WT	unknown	AAPEAKSASQKDLEDG	rank_018	0.82	B-C	0.9575	B	A,3-10	PEAKSASQ	30.23	10.609	13.544
postGMF-runs\2client\WT_analysis\more_scans\CITFA\CITFA_273-288_output	2client	WT	unknown	AAPEAKSASQKDLEDG	rank_005	0.81	C-D	0.967308	C	B,3-10	PEAKSASQ	40.973	5.578	10.589		postGMF-runs\1client\WT_analysis\more_scans\CITFA\CITFA_273-288_output	1client	WT	unknown	AAPEAKSASQKDLEDG	rank_015	0.82	B-C	0.95	C	A,3-10	PEAKSASQ	30.164	10.202	13.694
postGMF-runs\2client\WT_analysis\more_scans\CITFA\CITFA_273-288_output	2client	WT	unknown	AAPEAKSASQKDLEDG	rank_005	0.81	C-D	0.967308	D	A,3-10	PEAKSASQ	40.399	5.748	10.779		postGMF-runs\1client\WT_analysis\more_scans\CITFA\CITFA_273-288_output	1client	WT	unknown	AAPEAKSASQKDLEDG	rank_015	0.82	B-C	0.95	C	A,3-10	PEAKSASQ	30.164	10.202	13.694
postGMF-runs\2client\WT_analysis\more_scans\CITFA\CITFA_273-288_output	2client	WT	unknown	AAPEAKSASQKDLEDG	rank_009	0.8	C-D	0.960385	C	A,3-10	PEAKSASQ	39.729	5.885	11.084		postGMF-runs\1client\WT_analysis\more_scans\CITFA\CITFA_273-288_output	1client	WT	unknown	AAPEAKSASQKDLEDG	rank_023	0.82	B-C	0.978182	B	A,2-9	APEAKSAS	30.045	10.315	13.415
postGMF-runs\2client\WT_analysis\more_scans\CITFA\CITFA_273-288_output	2client	WT	unknown	AAPEAKSASQKDLEDG	rank_009	0.8	C-D	0.960385	D	B,3-10	PEAKSASQ	38.579	6.047	11.271		postGMF-runs\1client\WT_analysis\more_scans\CITFA\CITFA_273-288_output	1client	WT	unknown	AAPEAKSASQKDLEDG	rank_023	0.82	B-C	0.978182	B	A,2-9	APEAKSAS	30.045	10.315	13.415
postGMF-runs\2client\WT_analysis\more_scans\CITFA\CITFA_273-288_output	2client	WT	unknown	AAPEAKSASQKDLEDG	rank_023	0.78	C-D	0.973462	D	A,3-10	PEAKSASQ	39.699	8.06	12.542		postGMF-runs\1client\WT_analysis\more_scans\CITFA\CITFA_273-288_output	1client	WT	unknown	AAPEAKSASQKDLEDG	rank_012	0.83	B-C	0.956364	B	A,3-10	PEAKSASQ	29.778	9.523	13.263
postGMF-runs\2client\WT_analysis\more_scans\CITFA\CITFA_273-288_output	2client	WT	unknown	AAPEAKSASQKDLEDG	rank_023	0.78	C-D	0.973462	C	B,3-10	PEAKSASQ	38.551	8.037	12.575		postGMF-runs\1client\WT_analysis\more_scans\CITFA\CITFA_273-288_output	1client	WT	unknown	AAPEAKSASQKDLEDG	rank_012	0.83	B-C	0.956364	B	A,3-10	PEAKSASQ	29.778	9.523	13.263
postGMF-runs\2client\WT_analysis\more_scans\CITFA\CITFA_273-288_output	2client	WT	unknown	AAPEAKSASQKDLEDG	rank_008	0.8	C-D	0.951538	D	A,3-10	PEAKSASQ	39.518	5.97	11.183		postGMF-runs\1client\WT_analysis\more_scans\CITFA\CITFA_273-288_output	1client	WT	unknown	AAPEAKSASQKDLEDG	rank_017	0.82	B-C	0.969545	C	A,3-10	PEAKSASQ	29.715	9.429	12.957
postGMF-runs\2client\WT_analysis\more_scans\CITFA\CITFA_273-288_output	2client	WT	unknown	AAPEAKSASQKDLEDG	rank_008	0.8	C-D	0.951538	C	B,3-10	PEAKSASQ	39.158	5.96	11.131		postGMF-runs\1client\WT_analysis\more_scans\CITFA\CITFA_273-288_output	1client	WT	unknown	AAPEAKSASQKDLEDG	rank_017	0.82	B-C	0.969545	C	A,3-10	PEAKSASQ	29.715	9.429	12.957
postGMF-runs\2client\WT_analysis\more_scans\CITFA\CITFA_273-288_output	2client	WT	unknown	AAPEAKSASQKDLEDG	rank_016	0.79	C-D	0.993636	D	A,3-10	PEAKSASQ	39.116	6.843	11.811		postGMF-runs\1client\WT_analysis\more_scans\CITFA\CITFA_273-288_output	1client	WT	unknown	AAPEAKSASQKDLEDG	rank_022	0.82	B-C	1.02091	C	A,3-10	PEAKSASQ	28.5	10.265	13.001
postGMF-runs\2client\WT_analysis\more_scans\CITFA\CITFA_273-288_output	2client	WT	unknown	AAPEAKSASQKDLEDG	rank_016	0.79	C-D	0.993636	C	B,3-10	PEAKSASQ	38.287	6.906	11.811		postGMF-runs\1client\WT_analysis\more_scans\CITFA\CITFA_273-288_output	1client	WT	unknown	AAPEAKSASQKDLEDG	rank_022	0.82	B-C	1.02091	C	A,3-10	PEAKSASQ	28.5	10.265	13.001
postGMF-runs\2client\WT_analysis\more_scans\CITFA\CITFA_273-288_output	2client	WT	unknown	AAPEAKSASQKDLEDG	rank_011	0.79	C-D	0.987727	C	B,3-10	PEAKSASQ	38.84	6.173	11.132		postGMF-runs\1client\WT_analysis\more_scans\CITFA\CITFA_273-288_output	1client	WT	unknown	AAPEAKSASQKDLEDG	rank_014	0.82	B-C	0.954091	B	A,3-10	PEAKSASQ	28.197	10.156	14.085
postGMF-runs\2client\WT_analysis\more_scans\CITFA\CITFA_273-288_output	2client	WT	unknown	AAPEAKSASQKDLEDG	rank_011	0.79	C-D	0.987727	D	A,3-10	PEAKSASQ	36.77	6.434	11.554		postGMF-runs\1client\WT_analysis\more_scans\CITFA\CITFA_273-288_output	1client	WT	unknown	AAPEAKSASQKDLEDG	rank_014	0.82	B-C	0.954091	B	A,3-10	PEAKSASQ	28.197	10.156	14.085
postGMF-runs\2client\WT_analysis\more_scans\CITFA\CITFA_273-288_output	2client	WT	unknown	AAPEAKSASQKDLEDG	rank_024	0.78	C-D	1.00423	D	A,3-10	PEAKSASQ	38.5	7.703	12.164		postGMF-runs\1client\WT_analysis\more_scans\CITFA\CITFA_273-288_output	1client	WT	unknown	AAPEAKSASQKDLEDG	rank_019	0.82	B-C	0.963636	B	A,3-10	PEAKSASQ	27.939	10.653	13.672
postGMF-runs\2client\WT_analysis\more_scans\CITFA\CITFA_273-288_output	2client	WT	unknown	AAPEAKSASQKDLEDG	rank_024	0.78	C-D	1.00423	C	B,3-10	PEAKSASQ	37.331	7.801	12.269		postGMF-runs\1client\WT_analysis\more_scans\CITFA\CITFA_273-288_output	1client	WT	unknown	AAPEAKSASQKDLEDG	rank_019	0.82	B-C	0.963636	B	A,3-10	PEAKSASQ	27.939	10.653	13.672
postGMF-runs\2client\WT_analysis\more_scans\CITFA\CITFA_273-288_output	2client	WT	unknown	AAPEAKSASQKDLEDG	rank_018	0.79	C-D	0.985	C	B,3-10	PEAKSASQ	36.1	6.935	11.88		postGMF-runs\1client\WT_analysis\more_scans\CITFA\CITFA_273-288_output	1client	WT	unknown	AAPEAKSASQKDLEDG	rank_013	0.83	B-C	0.947727	B	A,3-10	PEAKSASQ	27.369	10.683	14.025
postGMF-runs\2client\WT_analysis\more_scans\CITFA\CITFA_273-288_output	2client	WT	unknown	AAPEAKSASQKDLEDG	rank_018	0.79	C-D	0.985	D	A,3-10	PEAKSASQ	35.141	6.932	11.95		postGMF-runs\1client\WT_analysis\more_scans\CITFA\CITFA_273-288_output	1client	WT	unknown	AAPEAKSASQKDLEDG	rank_013	0.83	B-C	0.947727	B	A,3-10	PEAKSASQ	27.369	10.683	14.025
postGMF-runs\2client\WT_analysis\more_scans\CITFA\CITFA_273-288_output	2client	WT	unknown	AAPEAKSASQKDLEDG	rank_025	0.78	C-D	0.984643	D	B,3-10	PEAKSASQ	35.529	8.053	12.706		postGMF-runs\1client\WT_analysis\more_scans\CITFA\CITFA_273-288_output	1client	WT	unknown	AAPEAKSASQKDLEDG	rank_024	0.81	B-C	0.983182	C	A,3-10	PEAKSASQ	26.707	11.184	13.981
postGMF-runs\2client\WT_analysis\more_scans\CITFA\CITFA_273-288_output	2client	WT	unknown	AAPEAKSASQKDLEDG	rank_025	0.78	C-D	0.984643	C	A,3-10	PEAKSASQ	34.983	8.087	12.745		postGMF-runs\1client\WT_analysis\more_scans\CITFA\CITFA_273-288_output	1client	WT	unknown	AAPEAKSASQKDLEDG	rank_024	0.81	B-C	0.983182	C	A,3-10	PEAKSASQ	26.707	11.184	13.981
postGMF-runs\2client\WT_analysis\more_scans\MTCL1\MTCL1_57-72_output	2client	WT	unknown	AAPGPAVPSSGRAPAP	rank_001	0.81	C-D	0.961818	D	A,5-12	PAVPSSGR	48.005	5.356	10.09		postGMF-runs\1client\WT_analysis\more_scans\MTCL1\MTCL1_57-72_output	1client	WT	unknown	AAPGPAVPSSGRAPAP	rank_008	0.81	B-C	1.02417	B	A,4-11	GPAVPSSG	34.295	10.995	13.148
postGMF-runs\2client\WT_analysis\more_scans\MTCL1\MTCL1_57-72_output	2client	WT	unknown	AAPGPAVPSSGRAPAP	rank_001	0.81	C-D	0.961818	C	B,5-12	PAVPSSGR	46.274	5.625	10.365		postGMF-runs\1client\WT_analysis\more_scans\MTCL1\MTCL1_57-72_output	1client	WT	unknown	AAPGPAVPSSGRAPAP	rank_008	0.81	B-C	1.02417	B	A,4-11	GPAVPSSG	34.295	10.995	13.148
postGMF-runs\2client\WT_analysis\more_scans\MTCL1\MTCL1_57-72_output	2client	WT	unknown	AAPGPAVPSSGRAPAP	rank_023	0.76	C-D	1.37867	D	B,3-10	PGPAVPSS	46.934	5.615	10.374		postGMF-runs\1client\WT_analysis\more_scans\MTCL1\MTCL1_57-72_output	1client	WT	unknown	AAPGPAVPSSGRAPAP	rank_022	0.77	B-C	1.33893	C	A,4-11	GPAVPSSG	33.069	9.373	12.729
postGMF-runs\2client\WT_analysis\more_scans\MTCL1\MTCL1_57-72_output	2client	WT	unknown	AAPGPAVPSSGRAPAP	rank_023	0.76	C-D	1.37867	C	A,4-11	GPAVPSSG	46.856	5.69	10.694		postGMF-runs\1client\WT_analysis\more_scans\MTCL1\MTCL1_57-72_output	1client	WT	unknown	AAPGPAVPSSGRAPAP	rank_022	0.77	B-C	1.33893	C	A,4-11	GPAVPSSG	33.069	9.373	12.729
postGMF-runs\2client\WT_analysis\more_scans\MTCL1\MTCL1_57-72_output	2client	WT	unknown	AAPGPAVPSSGRAPAP	rank_002	0.81	C-D	1.02818	C	A,5-12	PAVPSSGR	46.916	5.763	10.024		postGMF-runs\1client\WT_analysis\more_scans\MTCL1\MTCL1_57-72_output	1client	WT	unknown	AAPGPAVPSSGRAPAP	rank_021	0.78	B-C	1.36808	C	A,4-11	GPAVPSSG	32.891	8.63	12.588
postGMF-runs\2client\WT_analysis\more_scans\MTCL1\MTCL1_57-72_output	2client	WT	unknown	AAPGPAVPSSGRAPAP	rank_002	0.81	C-D	1.02818	D	B,5-12	PAVPSSGR	45.461	6.094	10.341		postGMF-runs\1client\WT_analysis\more_scans\MTCL1\MTCL1_57-72_output	1client	WT	unknown	AAPGPAVPSSGRAPAP	rank_021	0.78	B-C	1.36808	C	A,4-11	GPAVPSSG	32.891	8.63	12.588
postGMF-runs\2client\WT_analysis\more_scans\MTCL1\MTCL1_57-72_output	2client	WT	unknown	AAPGPAVPSSGRAPAP	rank_019	0.77	C-D	1.32367	C	A,4-11	GPAVPSSG	46.344	5.569	10.362		postGMF-runs\1client\WT_analysis\more_scans\MTCL1\MTCL1_57-72_output	1client	WT	unknown	AAPGPAVPSSGRAPAP	rank_024	0.76	B-C	1.40786	C	A,4-11	GPAVPSSG	32.888	9.387	13.189
postGMF-runs\2client\WT_analysis\more_scans\MTCL1\MTCL1_57-72_output	2client	WT	unknown	AAPGPAVPSSGRAPAP	rank_019	0.77	C-D	1.32367	D	B,3-10	PGPAVPSS	46.191	5.577	10.333		postGMF-runs\1client\WT_analysis\more_scans\MTCL1\MTCL1_57-72_output	1client	WT	unknown	AAPGPAVPSSGRAPAP	rank_024	0.76	B-C	1.40786	C	A,4-11	GPAVPSSG	32.888	9.387	13.189
postGMF-runs\2client\WT_analysis\more_scans\MTCL1\MTCL1_57-72_output	2client	WT	unknown	AAPGPAVPSSGRAPAP	rank_005	0.79	C-D	0.968182	C	B,3-10	PGPAVPSS	45.216	6.294	11.617		postGMF-runs\1client\WT_analysis\more_scans\MTCL1\MTCL1_57-72_output	1client	WT	unknown	AAPGPAVPSSGRAPAP	rank_020	0.79	B-C	1.25273	B	A,5-12	PAVPSSGR	32.813	8.81	13.464
postGMF-runs\2client\WT_analysis\more_scans\MTCL1\MTCL1_57-72_output	2client	WT	unknown	AAPGPAVPSSGRAPAP	rank_005	0.79	C-D	0.968182	D	A,3-10	PGPAVPSS	44.476	6.508	11.724		postGMF-runs\1client\WT_analysis\more_scans\MTCL1\MTCL1_57-72_output	1client	WT	unknown	AAPGPAVPSSGRAPAP	rank_020	0.79	B-C	1.25273	B	A,5-12	PAVPSSGR	32.813	8.81	13.464
postGMF-runs\2client\WT_analysis\more_scans\MTCL1\MTCL1_57-72_output	2client	WT	unknown	AAPGPAVPSSGRAPAP	rank_004	0.79	C-D	0.958636	C	B,5-12	PAVPSSGR	40.41	6.137	10.567		postGMF-runs\1client\WT_analysis\more_scans\MTCL1\MTCL1_57-72_output	1client	WT	unknown	AAPGPAVPSSGRAPAP	rank_016	0.81	B-C	1.1	B	A,5-12	PAVPSSGR	31.879	9.325	13.218
postGMF-runs\2client\WT_analysis\more_scans\MTCL1\MTCL1_57-72_output	2client	WT	unknown	AAPGPAVPSSGRAPAP	rank_004	0.79	C-D	0.958636	D	A,5-12	PAVPSSGR	40.404	6.147	10.598		postGMF-runs\1client\WT_analysis\more_scans\MTCL1\MTCL1_57-72_output	1client	WT	unknown	AAPGPAVPSSGRAPAP	rank_016	0.81	B-C	1.1	B	A,5-12	PAVPSSGR	31.879	9.325	13.218
postGMF-runs\2client\WT_analysis\more_scans\MTCL1\MTCL1_57-72_output	2client	WT	unknown	AAPGPAVPSSGRAPAP	rank_022	0.76	C-D	1.23038	D	A,5-12	PAVPSSGR	40.257	6.156	11.555		postGMF-runs\1client\WT_analysis\more_scans\MTCL1\MTCL1_57-72_output	1client	WT	unknown	AAPGPAVPSSGRAPAP	rank_005	0.81	B-C	1.04636	B	A,5-12	PAVPSSGR	31.633	9.242	13.666
postGMF-runs\2client\WT_analysis\more_scans\MTCL1\MTCL1_57-72_output	2client	WT	unknown	AAPGPAVPSSGRAPAP	rank_022	0.76	C-D	1.23038	C	B,5-12	PAVPSSGR	39.678	6.229	11.622		postGMF-runs\1client\WT_analysis\more_scans\MTCL1\MTCL1_57-72_output	1client	WT	unknown	AAPGPAVPSSGRAPAP	rank_005	0.81	B-C	1.04636	B	A,5-12	PAVPSSGR	31.633	9.242	13.666
postGMF-runs\2client\WT_analysis\more_scans\MTCL1\MTCL1_57-72_output	2client	WT	unknown	AAPGPAVPSSGRAPAP	rank_003	0.8	C-D	0.956364	C	A,5-12	PAVPSSGR	39.719	6.28	11.647		postGMF-runs\1client\WT_analysis\more_scans\MTCL1\MTCL1_57-72_output	1client	WT	unknown	AAPGPAVPSSGRAPAP	rank_011	0.81	B-C	1.01308	C	A,4-11	GPAVPSSG	31.362	10.821	14.278
postGMF-runs\2client\WT_analysis\more_scans\MTCL1\MTCL1_57-72_output	2client	WT	unknown	AAPGPAVPSSGRAPAP	rank_003	0.8	C-D	0.956364	D	B,5-12	PAVPSSGR	38.328	6.439	11.835		postGMF-runs\1client\WT_analysis\more_scans\MTCL1\MTCL1_57-72_output	1client	WT	unknown	AAPGPAVPSSGRAPAP	rank_011	0.81	B-C	1.01308	C	A,4-11	GPAVPSSG	31.362	10.821	14.278
postGMF-runs\2client\WT_analysis\more_scans\MTCL1\MTCL1_57-72_output	2client	WT	unknown	AAPGPAVPSSGRAPAP	rank_008	0.79	C-D	0.971818	D	A,4-11	GPAVPSSG	39.437	6.948	12.015		postGMF-runs\1client\WT_analysis\more_scans\MTCL1\MTCL1_57-72_output	1client	WT	unknown	AAPGPAVPSSGRAPAP	rank_004	0.81	B-C	0.970455	B	A,4-11	GPAVPSSG	30.705	10.238	13.552
postGMF-runs\2client\WT_analysis\more_scans\MTCL1\MTCL1_57-72_output	2client	WT	unknown	AAPGPAVPSSGRAPAP	rank_008	0.79	C-D	0.971818	C	B,5-12	PAVPSSGR	36.995	7.138	12.303		postGMF-runs\1client\WT_analysis\more_scans\MTCL1\MTCL1_57-72_output	1client	WT	unknown	AAPGPAVPSSGRAPAP	rank_004	0.81	B-C	0.970455	B	A,4-11	GPAVPSSG	30.705	10.238	13.552
postGMF-runs\2client\WT_analysis\more_scans\MTCL1\MTCL1_57-72_output	2client	WT	unknown	AAPGPAVPSSGRAPAP	rank_007	0.79	C-D	0.958182	C	A,5-12	PAVPSSGR	39.417	6.434	10.811		postGMF-runs\1client\WT_analysis\more_scans\MTCL1\MTCL1_57-72_output	1client	WT	unknown	AAPGPAVPSSGRAPAP	rank_019	0.81	B-C	1.11227	B	A,4-11	GPAVPSSG	30.502	9.31	13.47
postGMF-runs\2client\WT_analysis\more_scans\MTCL1\MTCL1_57-72_output	2client	WT	unknown	AAPGPAVPSSGRAPAP	rank_007	0.79	C-D	0.958182	D	B,5-12	PAVPSSGR	38.859	6.495	10.824		postGMF-runs\1client\WT_analysis\more_scans\MTCL1\MTCL1_57-72_output	1client	WT	unknown	AAPGPAVPSSGRAPAP	rank_019	0.81	B-C	1.11227	B	A,4-11	GPAVPSSG	30.502	9.31	13.47
postGMF-runs\2client\WT_analysis\more_scans\MTCL1\MTCL1_57-72_output	2client	WT	unknown	AAPGPAVPSSGRAPAP	rank_006	0.79	C-D	0.977308	C	A,3-10	PGPAVPSS	39.112	6.805	11.602		postGMF-runs\1client\WT_analysis\more_scans\MTCL1\MTCL1_57-72_output	1client	WT	unknown	AAPGPAVPSSGRAPAP	rank_023	0.77	B-C	1.33857	B	A,4-11	GPAVPSSG	30.19	9.926	13.505
postGMF-runs\2client\WT_analysis\more_scans\MTCL1\MTCL1_57-72_output	2client	WT	unknown	AAPGPAVPSSGRAPAP	rank_006	0.79	C-D	0.977308	D	B,3-10	PGPAVPSS	38.748	6.78	11.573		postGMF-runs\1client\WT_analysis\more_scans\MTCL1\MTCL1_57-72_output	1client	WT	unknown	AAPGPAVPSSGRAPAP	rank_023	0.77	B-C	1.33857	B	A,4-11	GPAVPSSG	30.19	9.926	13.505
postGMF-runs\2client\WT_analysis\more_scans\MTCL1\MTCL1_57-72_output	2client	WT	unknown	AAPGPAVPSSGRAPAP	rank_009	0.78	C-D	1.13545	C	B,5-12	PAVPSSGR	39.051	6.065	11.096		postGMF-runs\1client\WT_analysis\more_scans\MTCL1\MTCL1_57-72_output	1client	WT	unknown	AAPGPAVPSSGRAPAP	rank_015	0.81	B-C	1.08909	C	A,4-11	GPAVPSSG	30.155	9.189	13.505
postGMF-runs\2client\WT_analysis\more_scans\MTCL1\MTCL1_57-72_output	2client	WT	unknown	AAPGPAVPSSGRAPAP	rank_009	0.78	C-D	1.13545	D	A,5-12	PAVPSSGR	36.377	6.387	11.296		postGMF-runs\1client\WT_analysis\more_scans\MTCL1\MTCL1_57-72_output	1client	WT	unknown	AAPGPAVPSSGRAPAP	rank_015	0.81	B-C	1.08909	C	A,4-11	GPAVPSSG	30.155	9.189	13.505
postGMF-runs\2client\WT_analysis\more_scans\MTCL1\MTCL1_57-72_output	2client	WT	unknown	AAPGPAVPSSGRAPAP	rank_013	0.78	C-D	0.96625	D	A,4-11	GPAVPSSG	38.99	7.246	12.002		postGMF-runs\1client\WT_analysis\more_scans\MTCL1\MTCL1_57-72_output	1client	WT	unknown	AAPGPAVPSSGRAPAP	rank_001	0.82	B-C	0.992273	C	A,5-12	PAVPSSGR	29.86	10.301	13.175
postGMF-runs\2client\WT_analysis\more_scans\MTCL1\MTCL1_57-72_output	2client	WT	unknown	AAPGPAVPSSGRAPAP	rank_013	0.78	C-D	0.96625	C	B,4-11	GPAVPSSG	38.505	7.363	12.105		postGMF-runs\1client\WT_analysis\more_scans\MTCL1\MTCL1_57-72_output	1client	WT	unknown	AAPGPAVPSSGRAPAP	rank_001	0.82	B-C	0.992273	C	A,5-12	PAVPSSGR	29.86	10.301	13.175
postGMF-runs\2client\WT_analysis\more_scans\MTCL1\MTCL1_57-72_output	2client	WT	unknown	AAPGPAVPSSGRAPAP	rank_021	0.77	C-D	1.20727	C	A,4-11	GPAVPSSG	37.865	6.843	12.492		postGMF-runs\1client\WT_analysis\more_scans\MTCL1\MTCL1_57-72_output	1client	WT	unknown	AAPGPAVPSSGRAPAP	rank_018	0.8	B-C	1.02385	B	A,3-10	PGPAVPSS	29.592	11.983	15.284
postGMF-runs\2client\WT_analysis\more_scans\MTCL1\MTCL1_57-72_output	2client	WT	unknown	AAPGPAVPSSGRAPAP	rank_021	0.77	C-D	1.20727	D	B,4-11	GPAVPSSG	37.84	6.852	12.436		postGMF-runs\1client\WT_analysis\more_scans\MTCL1\MTCL1_57-72_output	1client	WT	unknown	AAPGPAVPSSGRAPAP	rank_018	0.8	B-C	1.02385	B	A,3-10	PGPAVPSS	29.592	11.983	15.284
postGMF-runs\2client\WT_analysis\more_scans\MTCL1\MTCL1_57-72_output	2client	WT	unknown	AAPGPAVPSSGRAPAP	rank_012	0.78	C-D	0.973333	C	B,4-11	GPAVPSSG	37.312	7.395	11.8		postGMF-runs\1client\WT_analysis\more_scans\MTCL1\MTCL1_57-72_output	1client	WT	unknown	AAPGPAVPSSGRAPAP	rank_014	0.81	B-C	1.00308	B	A,4-11	GPAVPSSG	29.455	11.619	14.553
postGMF-runs\2client\WT_analysis\more_scans\MTCL1\MTCL1_57-72_output	2client	WT	unknown	AAPGPAVPSSGRAPAP	rank_012	0.78	C-D	0.973333	D	A,4-11	GPAVPSSG	36.891	7.46	11.882		postGMF-runs\1client\WT_analysis\more_scans\MTCL1\MTCL1_57-72_output	1client	WT	unknown	AAPGPAVPSSGRAPAP	rank_014	0.81	B-C	1.00308	B	A,4-11	GPAVPSSG	29.455	11.619	14.553
postGMF-runs\2client\WT_analysis\more_scans\MTCL1\MTCL1_57-72_output	2client	WT	unknown	AAPGPAVPSSGRAPAP	rank_010	0.79	C-D	0.97	D	A,4-11	GPAVPSSG	36.871	7.043	11.958		postGMF-runs\1client\WT_analysis\more_scans\MTCL1\MTCL1_57-72_output	1client	WT	unknown	AAPGPAVPSSGRAPAP	rank_007	0.81	B-C	0.979091	B	A,4-11	GPAVPSSG	28.656	11.345	14.378
postGMF-runs\2client\WT_analysis\more_scans\MTCL1\MTCL1_57-72_output	2client	WT	unknown	AAPGPAVPSSGRAPAP	rank_010	0.79	C-D	0.97	C	B,4-11	GPAVPSSG	36.666	7.096	11.913		postGMF-runs\1client\WT_analysis\more_scans\MTCL1\MTCL1_57-72_output	1client	WT	unknown	AAPGPAVPSSGRAPAP	rank_007	0.81	B-C	0.979091	B	A,4-11	GPAVPSSG	28.656	11.345	14.378
postGMF-runs\2client\WT_analysis\more_scans\MTCL1\MTCL1_57-72_output	2client	WT	unknown	AAPGPAVPSSGRAPAP	rank_011	0.78	C-D	0.975909	D	B,5-12	PAVPSSGR	36.638	6.912	11.227		postGMF-runs\1client\WT_analysis\more_scans\MTCL1\MTCL1_57-72_output	1client	WT	unknown	AAPGPAVPSSGRAPAP	rank_012	0.81	B-C	1.00333	C	A,4-11	GPAVPSSG	27.69	11.624	14.643
postGMF-runs\2client\WT_analysis\more_scans\MTCL1\MTCL1_57-72_output	2client	WT	unknown	AAPGPAVPSSGRAPAP	rank_011	0.78	C-D	0.975909	C	A,5-12	PAVPSSGR	35.146	6.867	11.269		postGMF-runs\1client\WT_analysis\more_scans\MTCL1\MTCL1_57-72_output	1client	WT	unknown	AAPGPAVPSSGRAPAP	rank_012	0.81	B-C	1.00333	C	A,4-11	GPAVPSSG	27.69	11.624	14.643
postGMF-runs\2client\WT_analysis\more_scans\MTCL1\MTCL1_57-72_output	2client	WT	unknown	AAPGPAVPSSGRAPAP	rank_014	0.78	C-D	0.970769	D	A,4-11	GPAVPSSG	36.292	7.328	12.293		postGMF-runs\1client\WT_analysis\more_scans\MTCL1\MTCL1_57-72_output	1client	WT	unknown	AAPGPAVPSSGRAPAP	rank_003	0.82	B-C	0.98	B	A,4-11	GPAVPSSG	27.536	10.32	13.776
postGMF-runs\2client\WT_analysis\more_scans\MTCL1\MTCL1_57-72_output	2client	WT	unknown	AAPGPAVPSSGRAPAP	rank_014	0.78	C-D	0.970769	C	B,6-13	AVPSSGRA	36.238	8.119	12.96		postGMF-runs\1client\WT_analysis\more_scans\MTCL1\MTCL1_57-72_output	1client	WT	unknown	AAPGPAVPSSGRAPAP	rank_003	0.82	B-C	0.98	B	A,4-11	GPAVPSSG	27.536	10.32	13.776
postGMF-runs\2client\WT_analysis\more_scans\MTCL1\MTCL1_57-72_output	2client	WT	unknown	AAPGPAVPSSGRAPAP	rank_018	0.77	C-D	1.14182	C	A,5-12	PAVPSSGR	35.956	6.8	12.226		postGMF-runs\1client\WT_analysis\more_scans\MTCL1\MTCL1_57-72_output	1client	WT	unknown	AAPGPAVPSSGRAPAP	rank_006	0.81	B-C	1.01409	B	A,4-11	GPAVPSSG	27.08	11.039	13.343
postGMF-runs\2client\WT_analysis\more_scans\MTCL1\MTCL1_57-72_output	2client	WT	unknown	AAPGPAVPSSGRAPAP	rank_025	0.72	C-D	1.43036	C	A,3-10	PGPAVPSS	35.423	7.335	12.677		postGMF-runs\1client\WT_analysis\more_scans\MTCL1\MTCL1_57-72_output	1client	WT	unknown	AAPGPAVPSSGRAPAP	rank_002	0.82	B-C	0.985455	B	A,5-12	PAVPSSGR	25.96	10.999	14.465
postGMF-runs\2client\WT_analysis\more_scans\MTCL1\MTCL1_57-72_output	2client	WT	unknown	AAPGPAVPSSGRAPAP	rank_025	0.72	C-D	1.43036	D	B,3-10	PGPAVPSS	34.557	7.382	12.685		postGMF-runs\1client\WT_analysis\more_scans\MTCL1\MTCL1_57-72_output	1client	WT	unknown	AAPGPAVPSSGRAPAP	rank_002	0.82	B-C	0.985455	B	A,5-12	PAVPSSGR	25.96	10.999	14.465
postGMF-runs\2client\WT_analysis\more_scans\MTCL1\MTCL1_57-72_output	2client	WT	unknown	AAPGPAVPSSGRAPAP	rank_015	0.78	C-D	0.991923	C	B,3-10	PGPAVPSS	34.135	7.82	13.002		postGMF-runs\1client\WT_analysis\more_scans\MTCL1\MTCL1_57-72_output	1client	WT	unknown	AAPGPAVPSSGRAPAP	rank_010	0.81	B-C	0.975	C	A,4-11	GPAVPSSG	25.834	11.941	14.855
postGMF-runs\2client\WT_analysis\more_scans\MTCL1\MTCL1_73-88_output	2client	WT	unknown	AAPRSPNLAGKAPPSP	rank_002	0.81	C-D	0.977273	C	B,5-12	SPNLAGKA	45.691	5.604	11.371		postGMF-runs\1client\WT_analysis\more_scans\MTCL1\MTCL1_73-88_output	1client	WT	unknown	AAPRSPNLAGKAPPSP	rank_001	0.83	B-C	0.995455	B	A,5-12	SPNLAGKA	35.77	8.454	12.727
postGMF-runs\2client\WT_analysis\more_scans\MTCL1\MTCL1_73-88_output	2client	WT	unknown	AAPRSPNLAGKAPPSP	rank_002	0.81	C-D	0.977273	D	A,4-11	RSPNLAGK	45.368	5.656	11.123		postGMF-runs\1client\WT_analysis\more_scans\MTCL1\MTCL1_73-88_output	1client	WT	unknown	AAPRSPNLAGKAPPSP	rank_001	0.83	B-C	0.995455	B	A,5-12	SPNLAGKA	35.77	8.454	12.727
postGMF-runs\2client\WT_analysis\more_scans\MTCL1\MTCL1_73-88_output	2client	WT	unknown	AAPRSPNLAGKAPPSP	rank_001	0.81	C-D	1.12091	C	A,5-12	SPNLAGKA	45.601	4.906	10.271		postGMF-runs\1client\WT_analysis\more_scans\MTCL1\MTCL1_73-88_output	1client	WT	unknown	AAPRSPNLAGKAPPSP	rank_010	0.82	B-C	0.992083	B	A,4-11	RSPNLAGK	35.418	10.553	13.66
postGMF-runs\2client\WT_analysis\more_scans\MTCL1\MTCL1_73-88_output	2client	WT	unknown	AAPRSPNLAGKAPPSP	rank_001	0.81	C-D	1.12091	D	B,5-12	SPNLAGKA	45.186	4.93	10.204		postGMF-runs\1client\WT_analysis\more_scans\MTCL1\MTCL1_73-88_output	1client	WT	unknown	AAPRSPNLAGKAPPSP	rank_010	0.82	B-C	0.992083	B	A,4-11	RSPNLAGK	35.418	10.553	13.66
postGMF-runs\2client\WT_analysis\more_scans\MTCL1\MTCL1_73-88_output	2client	WT	unknown	AAPRSPNLAGKAPPSP	rank_004	0.8	C-D	1.16846	C	B,5-12	SPNLAGKA	44.991	4.964	10.147		postGMF-runs\1client\WT_analysis\more_scans\MTCL1\MTCL1_73-88_output	1client	WT	unknown	AAPRSPNLAGKAPPSP	rank_023	0.8	B-C	1.125	C	A,5-12	SPNLAGKA	34.154	9.194	12.757
postGMF-runs\2client\WT_analysis\more_scans\MTCL1\MTCL1_73-88_output	2client	WT	unknown	AAPRSPNLAGKAPPSP	rank_004	0.8	C-D	1.16846	D	A,5-12	SPNLAGKA	43.641	5.098	10.336		postGMF-runs\1client\WT_analysis\more_scans\MTCL1\MTCL1_73-88_output	1client	WT	unknown	AAPRSPNLAGKAPPSP	rank_023	0.8	B-C	1.125	C	A,5-12	SPNLAGKA	34.154	9.194	12.757
postGMF-runs\2client\WT_analysis\more_scans\MTCL1\MTCL1_73-88_output	2client	WT	unknown	AAPRSPNLAGKAPPSP	rank_006	0.79	C-D	1.00462	C	A,4-11	RSPNLAGK	43.216	6.71	11.912		postGMF-runs\1client\WT_analysis\more_scans\MTCL1\MTCL1_73-88_output	1client	WT	unknown	AAPRSPNLAGKAPPSP	rank_018	0.81	B-C	1.09227	C	A,5-12	SPNLAGKA	34.113	8.426	12.793
postGMF-runs\2client\WT_analysis\more_scans\MTCL1\MTCL1_73-88_output	2client	WT	unknown	AAPRSPNLAGKAPPSP	rank_006	0.79	C-D	1.00462	D	B,4-11	RSPNLAGK	42.286	6.448	11.706		postGMF-runs\1client\WT_analysis\more_scans\MTCL1\MTCL1_73-88_output	1client	WT	unknown	AAPRSPNLAGKAPPSP	rank_018	0.81	B-C	1.09227	C	A,5-12	SPNLAGKA	34.113	8.426	12.793
postGMF-runs\2client\WT_analysis\more_scans\MTCL1\MTCL1_73-88_output	2client	WT	unknown	AAPRSPNLAGKAPPSP	rank_005	0.8	C-D	0.987727	D	A,4-11	RSPNLAGK	43.156	6.224	11.526		postGMF-runs\1client\WT_analysis\more_scans\MTCL1\MTCL1_73-88_output	1client	WT	unknown	AAPRSPNLAGKAPPSP	rank_011	0.81	B-C	0.99375	C	A,4-11	RSPNLAGK	33.526	10.414	13.846
postGMF-runs\2client\WT_analysis\more_scans\MTCL1\MTCL1_73-88_output	2client	WT	unknown	AAPRSPNLAGKAPPSP	rank_005	0.8	C-D	0.987727	C	B,4-11	RSPNLAGK	42.757	6.3	11.552		postGMF-runs\1client\WT_analysis\more_scans\MTCL1\MTCL1_73-88_output	1client	WT	unknown	AAPRSPNLAGKAPPSP	rank_011	0.81	B-C	0.99375	C	A,4-11	RSPNLAGK	33.526	10.414	13.846
postGMF-runs\2client\WT_analysis\more_scans\MTCL1\MTCL1_73-88_output	2client	WT	unknown	AAPRSPNLAGKAPPSP	rank_016	0.78	C-D	1.17731	D	B,5-12	SPNLAGKA	42.297	5.903	11.149		postGMF-runs\1client\WT_analysis\more_scans\MTCL1\MTCL1_73-88_output	1client	WT	unknown	AAPRSPNLAGKAPPSP	rank_015	0.81	B-C	1.06909	C	A,5-12	SPNLAGKA	33.355	8.662	12.686
postGMF-runs\2client\WT_analysis\more_scans\MTCL1\MTCL1_73-88_output	2client	WT	unknown	AAPRSPNLAGKAPPSP	rank_016	0.78	C-D	1.17731	C	A,5-12	SPNLAGKA	41.506	5.975	11.23		postGMF-runs\1client\WT_analysis\more_scans\MTCL1\MTCL1_73-88_output	1client	WT	unknown	AAPRSPNLAGKAPPSP	rank_015	0.81	B-C	1.06909	C	A,5-12	SPNLAGKA	33.355	8.662	12.686
postGMF-runs\2client\WT_analysis\more_scans\MTCL1\MTCL1_73-88_output	2client	WT	unknown	AAPRSPNLAGKAPPSP	rank_003	0.81	C-D	0.970455	D	A,5-12	SPNLAGKA	42.243	5.897	11.555		postGMF-runs\1client\WT_analysis\more_scans\MTCL1\MTCL1_73-88_output	1client	WT	unknown	AAPRSPNLAGKAPPSP	rank_024	0.8	B-C	1.15682	B	A,5-12	SPNLAGKA	33.022	9.394	12.95
postGMF-runs\2client\WT_analysis\more_scans\MTCL1\MTCL1_73-88_output	2client	WT	unknown	AAPRSPNLAGKAPPSP	rank_003	0.81	C-D	0.970455	C	B,5-12	SPNLAGKA	42.055	5.868	11.587		postGMF-runs\1client\WT_analysis\more_scans\MTCL1\MTCL1_73-88_output	1client	WT	unknown	AAPRSPNLAGKAPPSP	rank_024	0.8	B-C	1.15682	B	A,5-12	SPNLAGKA	33.022	9.394	12.95
postGMF-runs\2client\WT_analysis\more_scans\MTCL1\MTCL1_73-88_output	2client	WT	unknown	AAPRSPNLAGKAPPSP	rank_009	0.79	C-D	0.982727	D	A,4-11	RSPNLAGK	41.426	6.768	12.359		postGMF-runs\1client\WT_analysis\more_scans\MTCL1\MTCL1_73-88_output	1client	WT	unknown	AAPRSPNLAGKAPPSP	rank_021	0.81	B-C	1.00333	C	A,5-12	SPNLAGKA	31.586	11.367	14.725
postGMF-runs\2client\WT_analysis\more_scans\MTCL1\MTCL1_73-88_output	2client	WT	unknown	AAPRSPNLAGKAPPSP	rank_009	0.79	C-D	0.982727	C	B,4-11	RSPNLAGK	41.171	6.718	12.303		postGMF-runs\1client\WT_analysis\more_scans\MTCL1\MTCL1_73-88_output	1client	WT	unknown	AAPRSPNLAGKAPPSP	rank_021	0.81	B-C	1.00333	C	A,5-12	SPNLAGKA	31.586	11.367	14.725
postGMF-runs\2client\WT_analysis\more_scans\MTCL1\MTCL1_73-88_output	2client	WT	unknown	AAPRSPNLAGKAPPSP	rank_024	0.77	C-D	1.24071	D	A,5-12	SPNLAGKA	41.219	6.175	11.447		postGMF-runs\1client\WT_analysis\more_scans\MTCL1\MTCL1_73-88_output	1client	WT	unknown	AAPRSPNLAGKAPPSP	rank_016	0.81	B-C	0.996154	C	A,4-11	RSPNLAGK	31.481	11.283	14.931
postGMF-runs\2client\WT_analysis\more_scans\MTCL1\MTCL1_73-88_output	2client	WT	unknown	AAPRSPNLAGKAPPSP	rank_024	0.77	C-D	1.24071	C	B,5-12	SPNLAGKA	40.796	6.195	11.559		postGMF-runs\1client\WT_analysis\more_scans\MTCL1\MTCL1_73-88_output	1client	WT	unknown	AAPRSPNLAGKAPPSP	rank_016	0.81	B-C	0.996154	C	A,4-11	RSPNLAGK	31.481	11.283	14.931
postGMF-runs\2client\WT_analysis\more_scans\MTCL1\MTCL1_73-88_output	2client	WT	unknown	AAPRSPNLAGKAPPSP	rank_008	0.79	C-D	0.972727	C	A,4-11	RSPNLAGK	40.854	6.772	12.696		postGMF-runs\1client\WT_analysis\more_scans\MTCL1\MTCL1_73-88_output	1client	WT	unknown	AAPRSPNLAGKAPPSP	rank_006	0.82	B-C	1.03455	C	A,5-12	SPNLAGKA	31.459	8.998	13.347
postGMF-runs\2client\WT_analysis\more_scans\MTCL1\MTCL1_73-88_output	2client	WT	unknown	AAPRSPNLAGKAPPSP	rank_008	0.79	C-D	0.972727	D	B,4-11	RSPNLAGK	40.337	6.869	12.785		postGMF-runs\1client\WT_analysis\more_scans\MTCL1\MTCL1_73-88_output	1client	WT	unknown	AAPRSPNLAGKAPPSP	rank_006	0.82	B-C	1.03455	C	A,5-12	SPNLAGKA	31.459	8.998	13.347
postGMF-runs\2client\WT_analysis\more_scans\MTCL1\MTCL1_73-88_output	2client	WT	unknown	AAPRSPNLAGKAPPSP	rank_012	0.78	C-D	1.11182	D	B,5-12	SPNLAGKA	40.624	6.291	11.703		postGMF-runs\1client\WT_analysis\more_scans\MTCL1\MTCL1_73-88_output	1client	WT	unknown	AAPRSPNLAGKAPPSP	rank_008	0.82	B-C	1.00409	C	A,5-12	SPNLAGKA	31.094	10.247	14.224
postGMF-runs\2client\WT_analysis\more_scans\MTCL1\MTCL1_73-88_output	2client	WT	unknown	AAPRSPNLAGKAPPSP	rank_014	0.78	C-D	0.974545	D	B,4-11	RSPNLAGK	40.187	6.899	12.669		postGMF-runs\1client\WT_analysis\more_scans\MTCL1\MTCL1_73-88_output	1client	WT	unknown	AAPRSPNLAGKAPPSP	rank_019	0.81	B-C	0.989615	B	A,5-12	SPNLAGKA	30.175	11.22	14.642
postGMF-runs\2client\WT_analysis\more_scans\MTCL1\MTCL1_73-88_output	2client	WT	unknown	AAPRSPNLAGKAPPSP	rank_014	0.78	C-D	0.974545	C	A,4-11	RSPNLAGK	40.158	6.958	12.68		postGMF-runs\1client\WT_analysis\more_scans\MTCL1\MTCL1_73-88_output	1client	WT	unknown	AAPRSPNLAGKAPPSP	rank_019	0.81	B-C	0.989615	B	A,5-12	SPNLAGKA	30.175	11.22	14.642
postGMF-runs\2client\WT_analysis\more_scans\MTCL1\MTCL1_73-88_output	2client	WT	unknown	AAPRSPNLAGKAPPSP	rank_023	0.78	C-D	1.00864	C	B,5-12	SPNLAGKA	38.957	7.727	12.691		postGMF-runs\1client\WT_analysis\more_scans\MTCL1\MTCL1_73-88_output	1client	WT	unknown	AAPRSPNLAGKAPPSP	rank_025	0.79	B-C	1.28364	B	A,5-12	SPNLAGKA	30.097	9.906	13.426
postGMF-runs\2client\WT_analysis\more_scans\MTCL1\MTCL1_73-88_output	2client	WT	unknown	AAPRSPNLAGKAPPSP	rank_010	0.79	C-D	1.01545	D	B,5-12	SPNLAGKA	38.086	6.343	12.026		postGMF-runs\1client\WT_analysis\more_scans\MTCL1\MTCL1_73-88_output	1client	WT	unknown	AAPRSPNLAGKAPPSP	rank_002	0.82	B-C	0.969583	B	A,5-12	SPNLAGKA	29.663	10.641	14.064
postGMF-runs\2client\WT_analysis\more_scans\MTCL1\MTCL1_73-88_output	2client	WT	unknown	AAPRSPNLAGKAPPSP	rank_010	0.79	C-D	1.01545	C	A,5-12	SPNLAGKA	38.083	6.301	12.02		postGMF-runs\1client\WT_analysis\more_scans\MTCL1\MTCL1_73-88_output	1client	WT	unknown	AAPRSPNLAGKAPPSP	rank_002	0.82	B-C	0.969583	B	A,5-12	SPNLAGKA	29.663	10.641	14.064
postGMF-runs\2client\WT_analysis\more_scans\MTCL1\MTCL1_73-88_output	2client	WT	unknown	AAPRSPNLAGKAPPSP	rank_015	0.78	C-D	0.963214	D	A,4-11	RSPNLAGK	37.852	7.011	13.32		postGMF-runs\1client\WT_analysis\more_scans\MTCL1\MTCL1_73-88_output	1client	WT	unknown	AAPRSPNLAGKAPPSP	rank_003	0.82	B-C	0.977273	B	A,5-12	SPNLAGKA	29.107	10.269	14.2
postGMF-runs\2client\WT_analysis\more_scans\MTCL1\MTCL1_73-88_output	2client	WT	unknown	AAPRSPNLAGKAPPSP	rank_015	0.78	C-D	0.963214	C	B,4-11	RSPNLAGK	37.296	7.182	13.433		postGMF-runs\1client\WT_analysis\more_scans\MTCL1\MTCL1_73-88_output	1client	WT	unknown	AAPRSPNLAGKAPPSP	rank_003	0.82	B-C	0.977273	B	A,5-12	SPNLAGKA	29.107	10.269	14.2
postGMF-runs\2client\WT_analysis\more_scans\MTCL1\MTCL1_73-88_output	2client	WT	unknown	AAPRSPNLAGKAPPSP	rank_018	0.78	C-D	0.956923	D	B,4-11	RSPNLAGK	37.749	7.264	13.407		postGMF-runs\1client\WT_analysis\more_scans\MTCL1\MTCL1_73-88_output	1client	WT	unknown	AAPRSPNLAGKAPPSP	rank_004	0.82	B-C	0.979545	B	A,5-12	SPNLAGKA	28.86	9.763	13.908
postGMF-runs\2client\WT_analysis\more_scans\MTCL1\MTCL1_73-88_output	2client	WT	unknown	AAPRSPNLAGKAPPSP	rank_018	0.78	C-D	0.956923	C	A,4-11	RSPNLAGK	37.711	7.26	13.42		postGMF-runs\1client\WT_analysis\more_scans\MTCL1\MTCL1_73-88_output	1client	WT	unknown	AAPRSPNLAGKAPPSP	rank_004	0.82	B-C	0.979545	B	A,5-12	SPNLAGKA	28.86	9.763	13.908
postGMF-runs\2client\WT_analysis\more_scans\MTCL1\MTCL1_73-88_output	2client	WT	unknown	AAPRSPNLAGKAPPSP	rank_020	0.78	C-D	0.989545	D	B,5-12	SPNLAGKA	35.43	7.325	12.575		postGMF-runs\1client\WT_analysis\more_scans\MTCL1\MTCL1_73-88_output	1client	WT	unknown	AAPRSPNLAGKAPPSP	rank_007	0.82	B-C	0.984167	B	A,4-11	RSPNLAGK	28.508	11.011	15.073
postGMF-runs\2client\WT_analysis\more_scans\MTCL1\MTCL1_73-88_output	2client	WT	unknown	AAPRSPNLAGKAPPSP	rank_020	0.78	C-D	0.989545	C	A,5-12	SPNLAGKA	35.058	7.379	12.659		postGMF-runs\1client\WT_analysis\more_scans\MTCL1\MTCL1_73-88_output	1client	WT	unknown	AAPRSPNLAGKAPPSP	rank_007	0.82	B-C	0.984167	B	A,4-11	RSPNLAGK	28.508	11.011	15.073
postGMF-runs\2client\WT_analysis\more_scans\MTCL1\MTCL1_73-88_output	2client	WT	unknown	AAPRSPNLAGKAPPSP	rank_013	0.78	C-D	0.973636	C	B,4-11	RSPNLAGK	35.326	7.218	12.918		postGMF-runs\1client\WT_analysis\more_scans\MTCL1\MTCL1_73-88_output	1client	WT	unknown	AAPRSPNLAGKAPPSP	rank_009	0.82	B-C	0.980833	B	A,4-11	RSPNLAGK	28.474	10.862	14.957
postGMF-runs\2client\WT_analysis\more_scans\MTCL1\MTCL1_73-88_output	2client	WT	unknown	AAPRSPNLAGKAPPSP	rank_013	0.78	C-D	0.973636	D	A,3-10	PRSPNLAG	32.934	7.69	13.174		postGMF-runs\1client\WT_analysis\more_scans\MTCL1\MTCL1_73-88_output	1client	WT	unknown	AAPRSPNLAGKAPPSP	rank_009	0.82	B-C	0.980833	B	A,4-11	RSPNLAGK	28.474	10.862	14.957
postGMF-runs\2client\WT_analysis\more_scans\MTCL1\MTCL1_73-88_output	2client	WT	unknown	AAPRSPNLAGKAPPSP	rank_021	0.78	C-D	0.99375	D	B,5-12	SPNLAGKA	34.124	7.585	12.829		postGMF-runs\1client\WT_analysis\more_scans\MTCL1\MTCL1_73-88_output	1client	WT	unknown	AAPRSPNLAGKAPPSP	rank_005	0.82	B-C	0.981364	C	A,5-12	SPNLAGKA	28.436	10.922	15.194
postGMF-runs\2client\WT_analysis\more_scans\MTCL1\MTCL1_73-88_output	2client	WT	unknown	AAPRSPNLAGKAPPSP	rank_017	0.78	C-D	0.970455	D	A,4-11	RSPNLAGK	33.646	7.478	13.343		postGMF-runs\1client\WT_analysis\more_scans\MTCL1\MTCL1_73-88_output	1client	WT	unknown	AAPRSPNLAGKAPPSP	rank_012	0.81	B-C	0.974091	B	A,5-12	SPNLAGKA	27.337	10.891	14.893
postGMF-runs\2client\WT_analysis\more_scans\MTCL1\MTCL1_73-88_output	2client	WT	unknown	AAPRSPNLAGKAPPSP	rank_017	0.78	C-D	0.970455	C	B,3-10	PRSPNLAG	31.953	7.89	13.545		postGMF-runs\1client\WT_analysis\more_scans\MTCL1\MTCL1_73-88_output	1client	WT	unknown	AAPRSPNLAGKAPPSP	rank_012	0.81	B-C	0.974091	B	A,5-12	SPNLAGKA	27.337	10.891	14.893
2client\hASCIZ-parsed\hASCIZ_473-488_output	2client	WT	unknown	AAQTDAFMDTCFQSGG	rank_003	0.79	C-D	1.3175	C	A,7-14	FMDTCFQS	66.849	4.416	7.509		1client\hASCIZ-parsed\hASCIZ_473-488_output	1client	WT	unknown	AAQTDAFMDTCFQSGG	rank_023	0.79	B-C	1.33917	B	A,3-10	QTDAFMDT	38.182	8.052	12.692
2client\hASCIZ-parsed\hASCIZ_473-488_output	2client	WT	unknown	AAQTDAFMDTCFQSGG	rank_003	0.79	C-D	1.3175	D	B,7-14	FMDTCFQS	66.234	4.54	7.682		1client\hASCIZ-parsed\hASCIZ_473-488_output	1client	WT	unknown	AAQTDAFMDTCFQSGG	rank_023	0.79	B-C	1.33917	B	A,3-10	QTDAFMDT	38.182	8.052	12.692
2client\hASCIZ-parsed\hASCIZ_473-488_output	2client	WT	unknown	AAQTDAFMDTCFQSGG	rank_011	0.76	C-D	1.35538	D	B,4-11	TDAFMDTC	54.431	5.102	10.066		1client\hASCIZ-parsed\hASCIZ_473-488_output	1client	WT	unknown	AAQTDAFMDTCFQSGG	rank_008	0.81	B-C	1.1035	C	A,2-9	AQTDAFMD	36.409	8.158	12.346
2client\hASCIZ-parsed\hASCIZ_473-488_output	2client	WT	unknown	AAQTDAFMDTCFQSGG	rank_011	0.76	C-D	1.35538	C	A,4-11	TDAFMDTC	52.687	5.363	10.447		1client\hASCIZ-parsed\hASCIZ_473-488_output	1client	WT	unknown	AAQTDAFMDTCFQSGG	rank_008	0.81	B-C	1.1035	C	A,2-9	AQTDAFMD	36.409	8.158	12.346
2client\hASCIZ-parsed\hASCIZ_473-488_output	2client	WT	unknown	AAQTDAFMDTCFQSGG	rank_019	0.75	C-D	1.33615	C	A,1-8	AAQTDAFM	46.624	6.719	11.706		1client\hASCIZ-parsed\hASCIZ_473-488_output	1client	WT	unknown	AAQTDAFMDTCFQSGG	rank_011	0.81	B-C	1.0625	B	A,4-11	TDAFMDTC	35.471	9.519	13.118
2client\hASCIZ-parsed\hASCIZ_473-488_output	2client	WT	unknown	AAQTDAFMDTCFQSGG	rank_019	0.75	C-D	1.33615	D	B,1-8	AAQTDAFM	46.476	6.763	11.722		1client\hASCIZ-parsed\hASCIZ_473-488_output	1client	WT	unknown	AAQTDAFMDTCFQSGG	rank_011	0.81	B-C	1.0625	B	A,4-11	TDAFMDTC	35.471	9.519	13.118
2client\hASCIZ-parsed\hASCIZ_473-488_output	2client	WT	unknown	AAQTDAFMDTCFQSGG	rank_024	0.74	C-D	1.42545	D	A,4-11	TDAFMDTC	45.617	6.68	12.257		1client\hASCIZ-parsed\hASCIZ_473-488_output	1client	WT	unknown	AAQTDAFMDTCFQSGG	rank_025	0.79	B-C	1.35375	B	A,5-12	DAFMDTCF	35.191	9.269	14.377
2client\hASCIZ-parsed\hASCIZ_473-488_output	2client	WT	unknown	AAQTDAFMDTCFQSGG	rank_024	0.74	C-D	1.42545	C	B,4-11	TDAFMDTC	45	6.785	12.471		1client\hASCIZ-parsed\hASCIZ_473-488_output	1client	WT	unknown	AAQTDAFMDTCFQSGG	rank_025	0.79	B-C	1.35375	B	A,5-12	DAFMDTCF	35.191	9.269	14.377
2client\hASCIZ-parsed\hASCIZ_473-488_output	2client	WT	unknown	AAQTDAFMDTCFQSGG	rank_018	0.75	C-D	1.37179	D	A,3-10	QTDAFMDT	43.249	6.099	11.801		1client\hASCIZ-parsed\hASCIZ_473-488_output	1client	WT	unknown	AAQTDAFMDTCFQSGG	rank_024	0.79	B-C	1.36545	B	A,4-11	TDAFMDTC	35.169	10.642	13.66
2client\hASCIZ-parsed\hASCIZ_473-488_output	2client	WT	unknown	AAQTDAFMDTCFQSGG	rank_018	0.75	C-D	1.37179	C	B,3-10	QTDAFMDT	41.943	6.181	11.96		1client\hASCIZ-parsed\hASCIZ_473-488_output	1client	WT	unknown	AAQTDAFMDTCFQSGG	rank_024	0.79	B-C	1.36545	B	A,4-11	TDAFMDTC	35.169	10.642	13.66
2client\hASCIZ-parsed\hASCIZ_473-488_output	2client	WT	unknown	AAQTDAFMDTCFQSGG	rank_001	0.79	C-D	1.03455	C	A,4-11	TDAFMDTC	42.38	6.19	12.285		1client\hASCIZ-parsed\hASCIZ_473-488_output	1client	WT	unknown	AAQTDAFMDTCFQSGG	rank_014	0.81	B-C	1.12773	C	A,3-10	QTDAFMDT	34.322	8.442	13.463
2client\hASCIZ-parsed\hASCIZ_473-488_output	2client	WT	unknown	AAQTDAFMDTCFQSGG	rank_001	0.79	C-D	1.03455	D	B,4-11	TDAFMDTC	41.711	6.275	12.39		1client\hASCIZ-parsed\hASCIZ_473-488_output	1client	WT	unknown	AAQTDAFMDTCFQSGG	rank_014	0.81	B-C	1.12773	C	A,3-10	QTDAFMDT	34.322	8.442	13.463
2client\hASCIZ-parsed\hASCIZ_473-488_output	2client	WT	unknown	AAQTDAFMDTCFQSGG	rank_008	0.77	C-D	1.25885	C	B,4-11	TDAFMDTC	42.168	6.228	12.256		1client\hASCIZ-parsed\hASCIZ_473-488_output	1client	WT	unknown	AAQTDAFMDTCFQSGG	rank_017	0.8	B-C	1.105	C	A,3-10	QTDAFMDT	33.736	9.569	13.395
2client\hASCIZ-parsed\hASCIZ_473-488_output	2client	WT	unknown	AAQTDAFMDTCFQSGG	rank_008	0.77	C-D	1.25885	D	A,4-11	TDAFMDTC	41.974	6.299	12.53		1client\hASCIZ-parsed\hASCIZ_473-488_output	1client	WT	unknown	AAQTDAFMDTCFQSGG	rank_017	0.8	B-C	1.105	C	A,3-10	QTDAFMDT	33.736	9.569	13.395
2client\hASCIZ-parsed\hASCIZ_473-488_output	2client	WT	unknown	AAQTDAFMDTCFQSGG	rank_021	0.75	C-D	1.41423	C	A,5-12	DAFMDTCF	41.924	6.98	13.409		1client\hASCIZ-parsed\hASCIZ_473-488_output	1client	WT	unknown	AAQTDAFMDTCFQSGG	rank_021	0.8	B-C	1.18636	B	A,4-11	TDAFMDTC	33.685	9.319	14.21
2client\hASCIZ-parsed\hASCIZ_473-488_output	2client	WT	unknown	AAQTDAFMDTCFQSGG	rank_021	0.75	C-D	1.41423	D	B,5-12	DAFMDTCF	40.457	7.091	13.746		1client\hASCIZ-parsed\hASCIZ_473-488_output	1client	WT	unknown	AAQTDAFMDTCFQSGG	rank_021	0.8	B-C	1.18636	B	A,4-11	TDAFMDTC	33.685	9.319	14.21
2client\hASCIZ-parsed\hASCIZ_473-488_output	2client	WT	unknown	AAQTDAFMDTCFQSGG	rank_006	0.77	C-D	1.16	C	B,5-12	DAFMDTCF	41.879	6.404	11.815		1client\hASCIZ-parsed\hASCIZ_473-488_output	1client	WT	unknown	AAQTDAFMDTCFQSGG	rank_007	0.81	B-C	1.04545	C	A,3-10	QTDAFMDT	33.64	8.68	13.203
2client\hASCIZ-parsed\hASCIZ_473-488_output	2client	WT	unknown	AAQTDAFMDTCFQSGG	rank_006	0.77	C-D	1.16	D	A,5-12	DAFMDTCF	41.689	6.467	11.936		1client\hASCIZ-parsed\hASCIZ_473-488_output	1client	WT	unknown	AAQTDAFMDTCFQSGG	rank_007	0.81	B-C	1.04545	C	A,3-10	QTDAFMDT	33.64	8.68	13.203
2client\hASCIZ-parsed\hASCIZ_473-488_output	2client	WT	unknown	AAQTDAFMDTCFQSGG	rank_002	0.79	C-D	1.00909	C	B,4-11	TDAFMDTC	41.356	6.033	11.931		1client\hASCIZ-parsed\hASCIZ_473-488_output	1client	WT	unknown	AAQTDAFMDTCFQSGG	rank_015	0.81	B-C	1.09364	C	A,4-11	TDAFMDTC	33.157	9.087	13.856
2client\hASCIZ-parsed\hASCIZ_473-488_output	2client	WT	unknown	AAQTDAFMDTCFQSGG	rank_002	0.79	C-D	1.00909	D	A,3-10	QTDAFMDT	37.869	7.057	12.821		1client\hASCIZ-parsed\hASCIZ_473-488_output	1client	WT	unknown	AAQTDAFMDTCFQSGG	rank_015	0.81	B-C	1.09364	C	A,4-11	TDAFMDTC	33.157	9.087	13.856
2client\hASCIZ-parsed\hASCIZ_473-488_output	2client	WT	unknown	AAQTDAFMDTCFQSGG	rank_015	0.75	C-D	1.3525	D	A,4-11	TDAFMDTC	40.717	6.286	11.623		1client\hASCIZ-parsed\hASCIZ_473-488_output	1client	WT	unknown	AAQTDAFMDTCFQSGG	rank_022	0.79	B-C	1.24818	C	A,4-11	TDAFMDTC	31.572	9.955	14.646
2client\hASCIZ-parsed\hASCIZ_473-488_output	2client	WT	unknown	AAQTDAFMDTCFQSGG	rank_015	0.75	C-D	1.3525	C	B,4-11	TDAFMDTC	40.504	6.296	11.652		1client\hASCIZ-parsed\hASCIZ_473-488_output	1client	WT	unknown	AAQTDAFMDTCFQSGG	rank_022	0.79	B-C	1.24818	C	A,4-11	TDAFMDTC	31.572	9.955	14.646
2client\hASCIZ-parsed\hASCIZ_473-488_output	2client	WT	unknown	AAQTDAFMDTCFQSGG	rank_007	0.77	C-D	1.03409	D	B,4-11	TDAFMDTC	40.616	7.564	13.484		1client\hASCIZ-parsed\hASCIZ_473-488_output	1client	WT	unknown	AAQTDAFMDTCFQSGG	rank_002	0.82	B-C	1.02318	C	A,3-10	QTDAFMDT	30.613	10.263	13.766
2client\hASCIZ-parsed\hASCIZ_473-488_output	2client	WT	unknown	AAQTDAFMDTCFQSGG	rank_007	0.77	C-D	1.03409	C	A,4-11	TDAFMDTC	40.15	7.653	13.549		1client\hASCIZ-parsed\hASCIZ_473-488_output	1client	WT	unknown	AAQTDAFMDTCFQSGG	rank_002	0.82	B-C	1.02318	C	A,3-10	QTDAFMDT	30.613	10.263	13.766
2client\hASCIZ-parsed\hASCIZ_473-488_output	2client	WT	unknown	AAQTDAFMDTCFQSGG	rank_005	0.77	C-D	1.11682	D	B,2-9	AQTDAFMD	40.609	6.424	12.82		1client\hASCIZ-parsed\hASCIZ_473-488_output	1client	WT	unknown	AAQTDAFMDTCFQSGG	rank_010	0.81	B-C	1.10636	B	A,2-9	AQTDAFMD	30.529	8.316	13.601
2client\hASCIZ-parsed\hASCIZ_473-488_output	2client	WT	unknown	AAQTDAFMDTCFQSGG	rank_005	0.77	C-D	1.11682	C	A,2-9	AQTDAFMD	40.021	6.424	12.884		1client\hASCIZ-parsed\hASCIZ_473-488_output	1client	WT	unknown	AAQTDAFMDTCFQSGG	rank_010	0.81	B-C	1.10636	B	A,2-9	AQTDAFMD	30.529	8.316	13.601
2client\hASCIZ-parsed\hASCIZ_473-488_output	2client	WT	unknown	AAQTDAFMDTCFQSGG	rank_014	0.76	C-D	1.32654	C	A,4-11	TDAFMDTC	40.598	6.795	12.952		1client\hASCIZ-parsed\hASCIZ_473-488_output	1client	WT	unknown	AAQTDAFMDTCFQSGG	rank_009	0.81	B-C	1.065	B	A,2-9	AQTDAFMD	30.178	8.532	14.072
2client\hASCIZ-parsed\hASCIZ_473-488_output	2client	WT	unknown	AAQTDAFMDTCFQSGG	rank_014	0.76	C-D	1.32654	D	B,4-11	TDAFMDTC	40.032	6.78	12.989		1client\hASCIZ-parsed\hASCIZ_473-488_output	1client	WT	unknown	AAQTDAFMDTCFQSGG	rank_009	0.81	B-C	1.065	B	A,2-9	AQTDAFMD	30.178	8.532	14.072
2client\hASCIZ-parsed\hASCIZ_473-488_output	2client	WT	unknown	AAQTDAFMDTCFQSGG	rank_020	0.75	C-D	1.32077	D	A,2-9	AQTDAFMD	40.234	6.67	12.486		1client\hASCIZ-parsed\hASCIZ_473-488_output	1client	WT	unknown	AAQTDAFMDTCFQSGG	rank_019	0.8	B-C	1.1025	B	A,3-10	QTDAFMDT	30.096	10.881	14.777
2client\hASCIZ-parsed\hASCIZ_473-488_output	2client	WT	unknown	AAQTDAFMDTCFQSGG	rank_020	0.75	C-D	1.32077	C	B,2-9	AQTDAFMD	39.809	6.812	12.628		1client\hASCIZ-parsed\hASCIZ_473-488_output	1client	WT	unknown	AAQTDAFMDTCFQSGG	rank_019	0.8	B-C	1.1025	B	A,3-10	QTDAFMDT	30.096	10.881	14.777
2client\hASCIZ-parsed\hASCIZ_473-488_output	2client	WT	unknown	AAQTDAFMDTCFQSGG	rank_016	0.76	C-D	1.2615	D	B,4-11	TDAFMDTC	39.837	7.213	13.33		1client\hASCIZ-parsed\hASCIZ_473-488_output	1client	WT	unknown	AAQTDAFMDTCFQSGG	rank_020	0.8	B-C	1.1325	B	A,3-10	QTDAFMDT	29.881	10.622	14.576
2client\hASCIZ-parsed\hASCIZ_473-488_output	2client	WT	unknown	AAQTDAFMDTCFQSGG	rank_016	0.76	C-D	1.2615	C	A,3-10	QTDAFMDT	38.717	7.366	13.317		1client\hASCIZ-parsed\hASCIZ_473-488_output	1client	WT	unknown	AAQTDAFMDTCFQSGG	rank_020	0.8	B-C	1.1325	B	A,3-10	QTDAFMDT	29.881	10.622	14.576
2client\hASCIZ-parsed\hASCIZ_473-488_output	2client	WT	unknown	AAQTDAFMDTCFQSGG	rank_009	0.77	C-D	1.03864	D	B,4-11	TDAFMDTC	39.56	7.751	13.143		1client\hASCIZ-parsed\hASCIZ_473-488_output	1client	WT	unknown	AAQTDAFMDTCFQSGG	rank_003	0.82	B-C	1.006	B	A,3-10	QTDAFMDT	29.865	10.452	14.787
2client\hASCIZ-parsed\hASCIZ_473-488_output	2client	WT	unknown	AAQTDAFMDTCFQSGG	rank_009	0.77	C-D	1.03864	C	A,4-11	TDAFMDTC	37.799	7.979	13.502		1client\hASCIZ-parsed\hASCIZ_473-488_output	1client	WT	unknown	AAQTDAFMDTCFQSGG	rank_003	0.82	B-C	1.006	B	A,3-10	QTDAFMDT	29.865	10.452	14.787
2client\hASCIZ-parsed\hASCIZ_473-488_output	2client	WT	unknown	AAQTDAFMDTCFQSGG	rank_017	0.75	C-D	1.31154	C	B,4-11	TDAFMDTC	39.214	7.112	14.028		1client\hASCIZ-parsed\hASCIZ_473-488_output	1client	WT	unknown	AAQTDAFMDTCFQSGG	rank_012	0.81	B-C	1.07727	C	A,2-9	AQTDAFMD	29.759	8.576	14.138
2client\hASCIZ-parsed\hASCIZ_473-488_output	2client	WT	unknown	AAQTDAFMDTCFQSGG	rank_017	0.75	C-D	1.31154	D	A,4-11	TDAFMDTC	38.309	7.21	14.264		1client\hASCIZ-parsed\hASCIZ_473-488_output	1client	WT	unknown	AAQTDAFMDTCFQSGG	rank_012	0.81	B-C	1.07727	C	A,2-9	AQTDAFMD	29.759	8.576	14.138
2client\hASCIZ-parsed\hASCIZ_473-488_output	2client	WT	unknown	AAQTDAFMDTCFQSGG	rank_023	0.74	C-D	1.35067	C	A,4-11	TDAFMDTC	38.182	7.459	13.096		1client\hASCIZ-parsed\hASCIZ_473-488_output	1client	WT	unknown	AAQTDAFMDTCFQSGG	rank_013	0.81	B-C	1.033	C	A,2-9	AQTDAFMD	29.417	9.855	14.629
2client\hASCIZ-parsed\hASCIZ_473-488_output	2client	WT	unknown	AAQTDAFMDTCFQSGG	rank_023	0.74	C-D	1.35067	D	B,3-10	QTDAFMDT	35.919	7.787	13.182		1client\hASCIZ-parsed\hASCIZ_473-488_output	1client	WT	unknown	AAQTDAFMDTCFQSGG	rank_013	0.81	B-C	1.033	C	A,2-9	AQTDAFMD	29.417	9.855	14.629
2client\hASCIZ-parsed\hASCIZ_473-488_output	2client	WT	unknown	AAQTDAFMDTCFQSGG	rank_004	0.78	C-D	1.065	C	B,3-10	QTDAFMDT	37.931	6.713	12.362		1client\hASCIZ-parsed\hASCIZ_473-488_output	1client	WT	unknown	AAQTDAFMDTCFQSGG	rank_018	0.8	B-C	1.0885	C	A,3-10	QTDAFMDT	28.796	11.036	14.842
2client\hASCIZ-parsed\hASCIZ_473-488_output	2client	WT	unknown	AAQTDAFMDTCFQSGG	rank_004	0.78	C-D	1.065	D	A,3-10	QTDAFMDT	37.01	6.822	12.729		1client\hASCIZ-parsed\hASCIZ_473-488_output	1client	WT	unknown	AAQTDAFMDTCFQSGG	rank_018	0.8	B-C	1.0885	C	A,3-10	QTDAFMDT	28.796	11.036	14.842
2client\hASCIZ-parsed\hASCIZ_473-488_output	2client	WT	unknown	AAQTDAFMDTCFQSGG	rank_025	0.73	C-D	1.39357	D	B,3-10	QTDAFMDT	36.694	7.356	12.867		1client\hASCIZ-parsed\hASCIZ_473-488_output	1client	WT	unknown	AAQTDAFMDTCFQSGG	rank_016	0.81	B-C	1.048	B	A,3-10	QTDAFMDT	28.616	10.869	14.915
2client\hASCIZ-parsed\hASCIZ_473-488_output	2client	WT	unknown	AAQTDAFMDTCFQSGG	rank_025	0.73	C-D	1.39357	C	A,3-10	QTDAFMDT	36.241	7.678	13.797		1client\hASCIZ-parsed\hASCIZ_473-488_output	1client	WT	unknown	AAQTDAFMDTCFQSGG	rank_016	0.81	B-C	1.048	B	A,3-10	QTDAFMDT	28.616	10.869	14.915
2client\hASCIZ-parsed\hASCIZ_473-488_output	2client	WT	unknown	AAQTDAFMDTCFQSGG	rank_012	0.77	C-D	1.105	D	B,3-10	QTDAFMDT	35.433	7.495	13.255		1client\hASCIZ-parsed\hASCIZ_473-488_output	1client	WT	unknown	AAQTDAFMDTCFQSGG	rank_006	0.82	B-C	0.999091	C	A,4-11	TDAFMDTC	28.6	10.073	15.259
2client\hASCIZ-parsed\hASCIZ_473-488_output	2client	WT	unknown	AAQTDAFMDTCFQSGG	rank_012	0.77	C-D	1.105	C	A,3-10	QTDAFMDT	34.869	7.475	13.295		1client\hASCIZ-parsed\hASCIZ_473-488_output	1client	WT	unknown	AAQTDAFMDTCFQSGG	rank_006	0.82	B-C	0.999091	C	A,4-11	TDAFMDTC	28.6	10.073	15.259
2client\hASCIZ-parsed\hASCIZ_473-488_output	2client	WT	unknown	AAQTDAFMDTCFQSGG	rank_010	0.77	C-D	1.05091	C	B,3-10	QTDAFMDT	34.739	7.887	13.467		1client\hASCIZ-parsed\hASCIZ_473-488_output	1client	WT	unknown	AAQTDAFMDTCFQSGG	rank_001	0.82	B-C	0.993636	B	A,4-11	TDAFMDTC	28.321	10.968	15.467
2client\hASCIZ-parsed\hASCIZ_473-488_output	2client	WT	unknown	AAQTDAFMDTCFQSGG	rank_010	0.77	C-D	1.05091	D	A,3-10	QTDAFMDT	34.01	7.77	13.55		1client\hASCIZ-parsed\hASCIZ_473-488_output	1client	WT	unknown	AAQTDAFMDTCFQSGG	rank_001	0.82	B-C	0.993636	B	A,4-11	TDAFMDTC	28.321	10.968	15.467
2client\hASCIZ-parsed\hASCIZ_473-488_output	2client	WT	unknown	AAQTDAFMDTCFQSGG	rank_013	0.77	C-D	1.08727	C	A,2-9	AQTDAFMD	34.129	7.74	13.345		1client\hASCIZ-parsed\hASCIZ_473-488_output	1client	WT	unknown	AAQTDAFMDTCFQSGG	rank_005	0.82	B-C	1.00636	B	A,4-11	TDAFMDTC	27.815	11.106	15.77
2client\hASCIZ-parsed\hASCIZ_473-488_output	2client	WT	unknown	AAQTDAFMDTCFQSGG	rank_013	0.77	C-D	1.08727	D	B,2-9	AQTDAFMD	33.984	7.768	13.42		1client\hASCIZ-parsed\hASCIZ_473-488_output	1client	WT	unknown	AAQTDAFMDTCFQSGG	rank_005	0.82	B-C	1.00636	B	A,4-11	TDAFMDTC	27.815	11.106	15.77
2client\hASCIZ-parsed\hASCIZ_473-488_output	2client	WT	unknown	AAQTDAFMDTCFQSGG	rank_022	0.75	C-D	1.2395	C	A,3-10	QTDAFMDT	33.611	8.081	13.935		1client\hASCIZ-parsed\hASCIZ_473-488_output	1client	WT	unknown	AAQTDAFMDTCFQSGG	rank_004	0.82	B-C	1.00318	B	A,3-10	QTDAFMDT	27.639	11.49	15.667
2client\hASCIZ-parsed\hASCIZ_473-488_output	2client	WT	unknown	AAQTDAFMDTCFQSGG	rank_022	0.75	C-D	1.2395	D	B,3-10	QTDAFMDT	33.154	8.087	13.903		1client\hASCIZ-parsed\hASCIZ_473-488_output	1client	WT	unknown	AAQTDAFMDTCFQSGG	rank_004	0.82	B-C	1.00318	B	A,3-10	QTDAFMDT	27.639	11.49	15.667
2client\AAA_analysis\newthreshold\Nathpaperpeptidesnonbinders\PLK1_output	2client	AAA	nonbinder	AASLIQKMAAADPTAR	rank_005	0.86	C-D	0.970385	D	B,4-11	LIQKMAAA	83.43	2.862	5.383		1client\AAA_analysis\newthreshold\Nathpaperpeptidesnonbinders\PLK1_output	1client	AAA	nonbinder	AASLIQKMAAADPTAR	rank_001	0.86	B-C	0.969615	B	A,4-11	LIQKMAAA	66.79	6.656	7.906
2client\AAA_analysis\newthreshold\Nathpaperpeptidesnonbinders\PLK1_output	2client	AAA	nonbinder	AASLIQKMAAADPTAR	rank_005	0.86	C-D	0.970385	C	A,5-12	IQKMAAAD	74.913	4.672	7.951		1client\AAA_analysis\newthreshold\Nathpaperpeptidesnonbinders\PLK1_output	1client	AAA	nonbinder	AASLIQKMAAADPTAR	rank_001	0.86	B-C	0.969615	B	A,4-11	LIQKMAAA	66.79	6.656	7.906
2client\AAA_analysis\newthreshold\Nathpaperpeptidesnonbinders\PLK1_output	2client	AAA	nonbinder	AASLIQKMAAADPTAR	rank_002	0.87	C-D	0.975385	C	A,3-10	SLIQKMAA	82.687	3.061	5.858		1client\AAA_analysis\newthreshold\Nathpaperpeptidesnonbinders\PLK1_output	1client	AAA	nonbinder	AASLIQKMAAADPTAR	rank_002	0.85	B-C	0.977083	C	A,5-12	IQKMAAAD	61.773	6.913	9.88
2client\AAA_analysis\newthreshold\Nathpaperpeptidesnonbinders\PLK1_output	2client	AAA	nonbinder	AASLIQKMAAADPTAR	rank_002	0.87	C-D	0.975385	D	B,3-10	SLIQKMAA	82.602	3.129	5.958		1client\AAA_analysis\newthreshold\Nathpaperpeptidesnonbinders\PLK1_output	1client	AAA	nonbinder	AASLIQKMAAADPTAR	rank_002	0.85	B-C	0.977083	C	A,5-12	IQKMAAAD	61.773	6.913	9.88
2client\AAA_analysis\newthreshold\Nathpaperpeptidesnonbinders\PLK1_output	2client	AAA	nonbinder	AASLIQKMAAADPTAR	rank_001	0.88	C-D	0.955769	D	A,5-12	IQKMAAAD	82.295	3.085	5.327		1client\AAA_analysis\newthreshold\Nathpaperpeptidesnonbinders\PLK1_output	1client	AAA	nonbinder	AASLIQKMAAADPTAR	rank_003	0.85	B-C	0.981538	C	A,4-11	LIQKMAAA	54.864	7.861	10.683
2client\AAA_analysis\newthreshold\Nathpaperpeptidesnonbinders\PLK1_output	2client	AAA	nonbinder	AASLIQKMAAADPTAR	rank_001	0.88	C-D	0.955769	C	B,5-12	IQKMAAAD	82.149	3.165	5.392		1client\AAA_analysis\newthreshold\Nathpaperpeptidesnonbinders\PLK1_output	1client	AAA	nonbinder	AASLIQKMAAADPTAR	rank_003	0.85	B-C	0.981538	C	A,4-11	LIQKMAAA	54.864	7.861	10.683
2client\AAA_analysis\newthreshold\Nathpaperpeptidesnonbinders\PLK1_output	2client	AAA	nonbinder	AASLIQKMAAADPTAR	rank_004	0.87	C-D	0.975	C	A,3-10	SLIQKMAA	81.423	3.32	6.299		1client\AAA_analysis\newthreshold\Nathpaperpeptidesnonbinders\PLK1_output	1client	AAA	nonbinder	AASLIQKMAAADPTAR	rank_004	0.84	B-C	0.967083	B	A,4-11	LIQKMAAA	49.455	9.078	10.648
2client\AAA_analysis\newthreshold\Nathpaperpeptidesnonbinders\PLK1_output	2client	AAA	nonbinder	AASLIQKMAAADPTAR	rank_004	0.87	C-D	0.975	D	B,3-10	SLIQKMAA	81.328	3.354	6.278		1client\AAA_analysis\newthreshold\Nathpaperpeptidesnonbinders\PLK1_output	1client	AAA	nonbinder	AASLIQKMAAADPTAR	rank_004	0.84	B-C	0.967083	B	A,4-11	LIQKMAAA	49.455	9.078	10.648
2client\AAA_analysis\newthreshold\Nathpaperpeptidesnonbinders\PLK1_output	2client	AAA	nonbinder	AASLIQKMAAADPTAR	rank_007	0.85	C-D	0.967083	D	A,5-12	IQKMAAAD	80.682	3.262	6.28		1client\AAA_analysis\newthreshold\Nathpaperpeptidesnonbinders\PLK1_output	1client	AAA	nonbinder	AASLIQKMAAADPTAR	rank_005	0.83	B-C	0.981154	B	A,4-11	LIQKMAAA	44.237	8.95	11.797
2client\AAA_analysis\newthreshold\Nathpaperpeptidesnonbinders\PLK1_output	2client	AAA	nonbinder	AASLIQKMAAADPTAR	rank_007	0.85	C-D	0.967083	C	B,5-12	IQKMAAAD	73.984	4.722	7.935		1client\AAA_analysis\newthreshold\Nathpaperpeptidesnonbinders\PLK1_output	1client	AAA	nonbinder	AASLIQKMAAADPTAR	rank_005	0.83	B-C	0.981154	B	A,4-11	LIQKMAAA	44.237	8.95	11.797
2client\AAA_analysis\newthreshold\Nathpaperpeptidesnonbinders\PLK1_output	2client	AAA	nonbinder	AASLIQKMAAADPTAR	rank_006	0.86	C-D	0.960455	C	A,5-12	IQKMAAAD	80.477	4.019	6.079		1client\AAA_analysis\newthreshold\Nathpaperpeptidesnonbinders\PLK1_output	1client	AAA	nonbinder	AASLIQKMAAADPTAR	rank_007	0.83	B-C	0.988182	B	A,5-12	IQKMAAAD	44.167	9.11	12.105
2client\AAA_analysis\newthreshold\Nathpaperpeptidesnonbinders\PLK1_output	2client	AAA	nonbinder	AASLIQKMAAADPTAR	rank_006	0.86	C-D	0.960455	D	B,5-12	IQKMAAAD	79.329	4.38	6.41		1client\AAA_analysis\newthreshold\Nathpaperpeptidesnonbinders\PLK1_output	1client	AAA	nonbinder	AASLIQKMAAADPTAR	rank_007	0.83	B-C	0.988182	B	A,5-12	IQKMAAAD	44.167	9.11	12.105
2client\AAA_analysis\newthreshold\Nathpaperpeptidesnonbinders\PLK1_output	2client	AAA	nonbinder	AASLIQKMAAADPTAR	rank_003	0.87	C-D	0.975385	C	A,5-12	IQKMAAAD	79.929	3.643	6.248		1client\AAA_analysis\newthreshold\Nathpaperpeptidesnonbinders\PLK1_output	1client	AAA	nonbinder	AASLIQKMAAADPTAR	rank_006	0.83	B-C	0.984583	C	A,4-11	LIQKMAAA	43.258	9.426	12.043
2client\AAA_analysis\newthreshold\Nathpaperpeptidesnonbinders\PLK1_output	2client	AAA	nonbinder	AASLIQKMAAADPTAR	rank_003	0.87	C-D	0.975385	D	B,5-12	IQKMAAAD	79.765	3.714	6.29		1client\AAA_analysis\newthreshold\Nathpaperpeptidesnonbinders\PLK1_output	1client	AAA	nonbinder	AASLIQKMAAADPTAR	rank_006	0.83	B-C	0.984583	C	A,4-11	LIQKMAAA	43.258	9.426	12.043
2client\AAA_analysis\newthreshold\Nathpaperpeptidesnonbinders\PLK1_output	2client	AAA	nonbinder	AASLIQKMAAADPTAR	rank_009	0.85	C-D	0.966429	D	B,5-12	IQKMAAAD	75.486	4.464	7.863		1client\AAA_analysis\newthreshold\Nathpaperpeptidesnonbinders\PLK1_output	1client	AAA	nonbinder	AASLIQKMAAADPTAR	rank_010	0.83	B-C	0.979643	C	A,4-11	LIQKMAAA	41.001	9.779	12.216
2client\AAA_analysis\newthreshold\Nathpaperpeptidesnonbinders\PLK1_output	2client	AAA	nonbinder	AASLIQKMAAADPTAR	rank_009	0.85	C-D	0.966429	C	A,5-12	IQKMAAAD	73.121	4.42	7.964		1client\AAA_analysis\newthreshold\Nathpaperpeptidesnonbinders\PLK1_output	1client	AAA	nonbinder	AASLIQKMAAADPTAR	rank_010	0.83	B-C	0.979643	C	A,4-11	LIQKMAAA	41.001	9.779	12.216
2client\AAA_analysis\newthreshold\Nathpaperpeptidesnonbinders\PLK1_output	2client	AAA	nonbinder	AASLIQKMAAADPTAR	rank_008	0.85	C-D	0.988077	D	B,5-12	IQKMAAAD	75.382	4.478	7.349		1client\AAA_analysis\newthreshold\Nathpaperpeptidesnonbinders\PLK1_output	1client	AAA	nonbinder	AASLIQKMAAADPTAR	rank_012	0.82	B-C	0.984231	C	A,4-11	LIQKMAAA	38.973	10.191	12.714
2client\AAA_analysis\newthreshold\Nathpaperpeptidesnonbinders\PLK1_output	2client	AAA	nonbinder	AASLIQKMAAADPTAR	rank_008	0.85	C-D	0.988077	C	A,5-12	IQKMAAAD	74.843	4.574	7.519		1client\AAA_analysis\newthreshold\Nathpaperpeptidesnonbinders\PLK1_output	1client	AAA	nonbinder	AASLIQKMAAADPTAR	rank_012	0.82	B-C	0.984231	C	A,4-11	LIQKMAAA	38.973	10.191	12.714
2client\AAA_analysis\newthreshold\Nathpaperpeptidesnonbinders\PLK1_output	2client	AAA	nonbinder	AASLIQKMAAADPTAR	rank_010	0.85	C-D	1.00615	C	A,5-12	IQKMAAAD	74.514	4.742	7.652		1client\AAA_analysis\newthreshold\Nathpaperpeptidesnonbinders\PLK1_output	1client	AAA	nonbinder	AASLIQKMAAADPTAR	rank_008	0.83	B-C	0.980417	B	A,5-12	IQKMAAAD	37.591	9.412	12.827
2client\AAA_analysis\newthreshold\Nathpaperpeptidesnonbinders\PLK1_output	2client	AAA	nonbinder	AASLIQKMAAADPTAR	rank_010	0.85	C-D	1.00615	D	B,5-12	IQKMAAAD	73.281	4.92	7.833		1client\AAA_analysis\newthreshold\Nathpaperpeptidesnonbinders\PLK1_output	1client	AAA	nonbinder	AASLIQKMAAADPTAR	rank_008	0.83	B-C	0.980417	B	A,5-12	IQKMAAAD	37.591	9.412	12.827
2client\AAA_analysis\newthreshold\Nathpaperpeptidesnonbinders\PLK1_output	2client	AAA	nonbinder	AASLIQKMAAADPTAR	rank_012	0.82	C-D	0.967308	C	A,5-12	IQKMAAAD	70.153	5.659	8.505		1client\AAA_analysis\newthreshold\Nathpaperpeptidesnonbinders\PLK1_output	1client	AAA	nonbinder	AASLIQKMAAADPTAR	rank_017	0.82	B-C	0.97	C	A,4-11	LIQKMAAA	34.045	9.861	13.034
2client\AAA_analysis\newthreshold\Nathpaperpeptidesnonbinders\PLK1_output	2client	AAA	nonbinder	AASLIQKMAAADPTAR	rank_012	0.82	C-D	0.967308	D	B,5-12	IQKMAAAD	68.759	5.709	8.722		1client\AAA_analysis\newthreshold\Nathpaperpeptidesnonbinders\PLK1_output	1client	AAA	nonbinder	AASLIQKMAAADPTAR	rank_017	0.82	B-C	0.97	C	A,4-11	LIQKMAAA	34.045	9.861	13.034
2client\AAA_analysis\newthreshold\Nathpaperpeptidesnonbinders\PLK1_output	2client	AAA	nonbinder	AASLIQKMAAADPTAR	rank_011	0.84	C-D	1.00654	C	A,5-12	IQKMAAAD	69.849	5.425	8.522		1client\AAA_analysis\newthreshold\Nathpaperpeptidesnonbinders\PLK1_output	1client	AAA	nonbinder	AASLIQKMAAADPTAR	rank_009	0.83	B-C	0.966364	B	A,4-11	LIQKMAAA	33.881	8.802	12.199
2client\AAA_analysis\newthreshold\Nathpaperpeptidesnonbinders\PLK1_output	2client	AAA	nonbinder	AASLIQKMAAADPTAR	rank_011	0.84	C-D	1.00654	D	B,5-12	IQKMAAAD	69.609	5.475	8.572		1client\AAA_analysis\newthreshold\Nathpaperpeptidesnonbinders\PLK1_output	1client	AAA	nonbinder	AASLIQKMAAADPTAR	rank_009	0.83	B-C	0.966364	B	A,4-11	LIQKMAAA	33.881	8.802	12.199
2client\AAA_analysis\newthreshold\Nathpaperpeptidesnonbinders\PLK1_output	2client	AAA	nonbinder	AASLIQKMAAADPTAR	rank_013	0.82	C-D	0.986071	D	B,4-11	LIQKMAAA	64.346	5.518	9.157		1client\AAA_analysis\newthreshold\Nathpaperpeptidesnonbinders\PLK1_output	1client	AAA	nonbinder	AASLIQKMAAADPTAR	rank_015	0.82	B-C	0.95	B	A,4-11	LIQKMAAA	33.811	9.64	12.779
2client\AAA_analysis\newthreshold\Nathpaperpeptidesnonbinders\PLK1_output	2client	AAA	nonbinder	AASLIQKMAAADPTAR	rank_013	0.82	C-D	0.986071	C	A,4-11	LIQKMAAA	64.124	5.618	9.261		1client\AAA_analysis\newthreshold\Nathpaperpeptidesnonbinders\PLK1_output	1client	AAA	nonbinder	AASLIQKMAAADPTAR	rank_015	0.82	B-C	0.95	B	A,4-11	LIQKMAAA	33.811	9.64	12.779
2client\AAA_analysis\newthreshold\Nathpaperpeptidesnonbinders\PLK1_output	2client	AAA	nonbinder	AASLIQKMAAADPTAR	rank_014	0.82	C-D	0.995769	C	B,5-12	IQKMAAAD	63.211	6.21	9.514		1client\AAA_analysis\newthreshold\Nathpaperpeptidesnonbinders\PLK1_output	1client	AAA	nonbinder	AASLIQKMAAADPTAR	rank_016	0.82	B-C	0.9875	C	A,5-12	IQKMAAAD	33.359	9.986	13.287
2client\AAA_analysis\newthreshold\Nathpaperpeptidesnonbinders\PLK1_output	2client	AAA	nonbinder	AASLIQKMAAADPTAR	rank_014	0.82	C-D	0.995769	D	A,5-12	IQKMAAAD	62.356	6.287	9.628		1client\AAA_analysis\newthreshold\Nathpaperpeptidesnonbinders\PLK1_output	1client	AAA	nonbinder	AASLIQKMAAADPTAR	rank_016	0.82	B-C	0.9875	C	A,5-12	IQKMAAAD	33.359	9.986	13.287
2client\AAA_analysis\newthreshold\Nathpaperpeptidesnonbinders\PLK1_output	2client	AAA	nonbinder	AASLIQKMAAADPTAR	rank_015	0.8	C-D	0.969615	C	B,5-12	IQKMAAAD	61.145	6.472	10.132		1client\AAA_analysis\newthreshold\Nathpaperpeptidesnonbinders\PLK1_output	1client	AAA	nonbinder	AASLIQKMAAADPTAR	rank_014	0.82	B-C	0.9565	C	A,4-11	LIQKMAAA	33.174	9.952	13.41
2client\AAA_analysis\newthreshold\Nathpaperpeptidesnonbinders\PLK1_output	2client	AAA	nonbinder	AASLIQKMAAADPTAR	rank_015	0.8	C-D	0.969615	D	A,5-12	IQKMAAAD	57.44	6.854	10.544		1client\AAA_analysis\newthreshold\Nathpaperpeptidesnonbinders\PLK1_output	1client	AAA	nonbinder	AASLIQKMAAADPTAR	rank_014	0.82	B-C	0.9565	C	A,4-11	LIQKMAAA	33.174	9.952	13.41
2client\AAA_analysis\newthreshold\Nathpaperpeptidesnonbinders\PLK1_output	2client	AAA	nonbinder	AASLIQKMAAADPTAR	rank_016	0.8	C-D	0.961786	C	B,5-12	IQKMAAAD	56.852	6.547	10.098		1client\AAA_analysis\newthreshold\Nathpaperpeptidesnonbinders\PLK1_output	1client	AAA	nonbinder	AASLIQKMAAADPTAR	rank_019	0.82	B-C	0.964091	B	A,5-12	IQKMAAAD	30.418	10.274	13.635
2client\AAA_analysis\newthreshold\Nathpaperpeptidesnonbinders\PLK1_output	2client	AAA	nonbinder	AASLIQKMAAADPTAR	rank_016	0.8	C-D	0.961786	D	A,5-12	IQKMAAAD	56.105	6.533	10.113		1client\AAA_analysis\newthreshold\Nathpaperpeptidesnonbinders\PLK1_output	1client	AAA	nonbinder	AASLIQKMAAADPTAR	rank_019	0.82	B-C	0.964091	B	A,5-12	IQKMAAAD	30.418	10.274	13.635
2client\AAA_analysis\newthreshold\Nathpaperpeptidesnonbinders\PLK1_output	2client	AAA	nonbinder	AASLIQKMAAADPTAR	rank_018	0.8	C-D	0.976071	C	A,5-12	IQKMAAAD	56.206	6.719	10.249		1client\AAA_analysis\newthreshold\Nathpaperpeptidesnonbinders\PLK1_output	1client	AAA	nonbinder	AASLIQKMAAADPTAR	rank_020	0.82	B-C	0.981667	B	A,5-12	IQKMAAAD	30.374	9.937	13.905
2client\AAA_analysis\newthreshold\Nathpaperpeptidesnonbinders\PLK1_output	2client	AAA	nonbinder	AASLIQKMAAADPTAR	rank_018	0.8	C-D	0.976071	D	B,5-12	IQKMAAAD	54.583	6.857	10.457		1client\AAA_analysis\newthreshold\Nathpaperpeptidesnonbinders\PLK1_output	1client	AAA	nonbinder	AASLIQKMAAADPTAR	rank_020	0.82	B-C	0.981667	B	A,5-12	IQKMAAAD	30.374	9.937	13.905
2client\AAA_analysis\newthreshold\Nathpaperpeptidesnonbinders\PLK1_output	2client	AAA	nonbinder	AASLIQKMAAADPTAR	rank_019	0.79	C-D	1.00417	C	B,4-11	LIQKMAAA	49.555	6.725	11.356		1client\AAA_analysis\newthreshold\Nathpaperpeptidesnonbinders\PLK1_output	1client	AAA	nonbinder	AASLIQKMAAADPTAR	rank_023	0.82	B-C	1.01643	B	A,4-11	LIQKMAAA	29.962	10.142	12.927
2client\AAA_analysis\newthreshold\Nathpaperpeptidesnonbinders\PLK1_output	2client	AAA	nonbinder	AASLIQKMAAADPTAR	rank_019	0.79	C-D	1.00417	D	A,4-11	LIQKMAAA	45.2	7.061	11.62		1client\AAA_analysis\newthreshold\Nathpaperpeptidesnonbinders\PLK1_output	1client	AAA	nonbinder	AASLIQKMAAADPTAR	rank_023	0.82	B-C	1.01643	B	A,4-11	LIQKMAAA	29.962	10.142	12.927
2client\AAA_analysis\newthreshold\Nathpaperpeptidesnonbinders\PLK1_output	2client	AAA	nonbinder	AASLIQKMAAADPTAR	rank_024	0.78	C-D	0.995	D	A,4-11	LIQKMAAA	44.278	7.521	11.75		1client\AAA_analysis\newthreshold\Nathpaperpeptidesnonbinders\PLK1_output	1client	AAA	nonbinder	AASLIQKMAAADPTAR	rank_021	0.82	B-C	0.981071	C	A,4-11	LIQKMAAA	29.173	10.907	14.075
2client\AAA_analysis\newthreshold\Nathpaperpeptidesnonbinders\PLK1_output	2client	AAA	nonbinder	AASLIQKMAAADPTAR	rank_024	0.78	C-D	0.995	C	B,4-11	LIQKMAAA	43.191	7.81	11.956		1client\AAA_analysis\newthreshold\Nathpaperpeptidesnonbinders\PLK1_output	1client	AAA	nonbinder	AASLIQKMAAADPTAR	rank_021	0.82	B-C	0.981071	C	A,4-11	LIQKMAAA	29.173	10.907	14.075
2client\AAA_analysis\newthreshold\Nathpaperpeptidesnonbinders\PLK1_output	2client	AAA	nonbinder	AASLIQKMAAADPTAR	rank_017	0.8	C-D	0.960909	D	A,4-11	LIQKMAAA	43.725	6.404	10.875		1client\AAA_analysis\newthreshold\Nathpaperpeptidesnonbinders\PLK1_output	1client	AAA	nonbinder	AASLIQKMAAADPTAR	rank_018	0.82	B-C	1.015	C	A,5-12	IQKMAAAD	29.029	11.163	14.229
2client\AAA_analysis\newthreshold\Nathpaperpeptidesnonbinders\PLK1_output	2client	AAA	nonbinder	AASLIQKMAAADPTAR	rank_017	0.8	C-D	0.960909	C	B,4-11	LIQKMAAA	42.895	6.388	10.906		1client\AAA_analysis\newthreshold\Nathpaperpeptidesnonbinders\PLK1_output	1client	AAA	nonbinder	AASLIQKMAAADPTAR	rank_018	0.82	B-C	1.015	C	A,5-12	IQKMAAAD	29.029	11.163	14.229
2client\AAA_analysis\newthreshold\Nathpaperpeptidesnonbinders\PLK1_output	2client	AAA	nonbinder	AASLIQKMAAADPTAR	rank_023	0.79	C-D	0.99375	D	B,4-11	LIQKMAAA	43.723	7.346	11.888		1client\AAA_analysis\newthreshold\Nathpaperpeptidesnonbinders\PLK1_output	1client	AAA	nonbinder	AASLIQKMAAADPTAR	rank_013	0.82	B-C	0.972917	B	A,4-11	LIQKMAAA	28.244	11.186	14.092
2client\AAA_analysis\newthreshold\Nathpaperpeptidesnonbinders\PLK1_output	2client	AAA	nonbinder	AASLIQKMAAADPTAR	rank_023	0.79	C-D	0.99375	C	A,4-11	LIQKMAAA	42.413	7.334	11.956		1client\AAA_analysis\newthreshold\Nathpaperpeptidesnonbinders\PLK1_output	1client	AAA	nonbinder	AASLIQKMAAADPTAR	rank_013	0.82	B-C	0.972917	B	A,4-11	LIQKMAAA	28.244	11.186	14.092
2client\AAA_analysis\newthreshold\Nathpaperpeptidesnonbinders\PLK1_output	2client	AAA	nonbinder	AASLIQKMAAADPTAR	rank_021	0.79	C-D	0.985909	D	A,4-11	LIQKMAAA	43.449	7.113	11.315		1client\AAA_analysis\newthreshold\Nathpaperpeptidesnonbinders\PLK1_output	1client	AAA	nonbinder	AASLIQKMAAADPTAR	rank_024	0.82	B-C	0.990455	C	A,5-12	IQKMAAAD	27.376	11.011	14.452
2client\AAA_analysis\newthreshold\Nathpaperpeptidesnonbinders\PLK1_output	2client	AAA	nonbinder	AASLIQKMAAADPTAR	rank_021	0.79	C-D	0.985909	C	B,4-11	LIQKMAAA	41.853	7.36	11.833		1client\AAA_analysis\newthreshold\Nathpaperpeptidesnonbinders\PLK1_output	1client	AAA	nonbinder	AASLIQKMAAADPTAR	rank_024	0.82	B-C	0.990455	C	A,5-12	IQKMAAAD	27.376	11.011	14.452
2client\AAA_analysis\newthreshold\Nathpaperpeptidesnonbinders\PLK1_output	2client	AAA	nonbinder	AASLIQKMAAADPTAR	rank_020	0.79	C-D	0.952917	C	B,4-11	LIQKMAAA	39.368	7.089	11.409		1client\AAA_analysis\newthreshold\Nathpaperpeptidesnonbinders\PLK1_output	1client	AAA	nonbinder	AASLIQKMAAADPTAR	rank_011	0.82	B-C	1.01375	C	A,5-12	IQKMAAAD	27.355	10.886	14.327
2client\AAA_analysis\newthreshold\Nathpaperpeptidesnonbinders\PLK1_output	2client	AAA	nonbinder	AASLIQKMAAADPTAR	rank_020	0.79	C-D	0.952917	D	A,4-11	LIQKMAAA	38.474	7.166	11.641		1client\AAA_analysis\newthreshold\Nathpaperpeptidesnonbinders\PLK1_output	1client	AAA	nonbinder	AASLIQKMAAADPTAR	rank_011	0.82	B-C	1.01375	C	A,5-12	IQKMAAAD	27.355	10.886	14.327
2client\AAA_analysis\newthreshold\Nathpaperpeptidesnonbinders\PLK1_output	2client	AAA	nonbinder	AASLIQKMAAADPTAR	rank_022	0.79	C-D	0.941333	D	A,4-11	LIQKMAAA	35.136	7.557	12.262		1client\AAA_analysis\newthreshold\Nathpaperpeptidesnonbinders\PLK1_output	1client	AAA	nonbinder	AASLIQKMAAADPTAR	rank_025	0.81	B-C	1.00727	C	A,2-9	ASLIQKMA	26.893	11.198	15.101
2client\AAA_analysis\newthreshold\Nathpaperpeptidesnonbinders\PLK1_output	2client	AAA	nonbinder	AASLIQKMAAADPTAR	rank_022	0.79	C-D	0.941333	C	B,4-11	LIQKMAAA	35.091	7.718	12.446		1client\AAA_analysis\newthreshold\Nathpaperpeptidesnonbinders\PLK1_output	1client	AAA	nonbinder	AASLIQKMAAADPTAR	rank_025	0.81	B-C	1.00727	C	A,2-9	ASLIQKMA	26.893	11.198	15.101
2client\AAA_analysis\newthreshold\Nathpaperpeptidesnonbinders\PLK1_output	2client	AAA	nonbinder	AASLIQKMAAADPTAR	rank_025	0.78	C-D	0.950385	C	B,4-11	LIQKMAAA	35.136	8.219	12.78		1client\AAA_analysis\newthreshold\Nathpaperpeptidesnonbinders\PLK1_output	1client	AAA	nonbinder	AASLIQKMAAADPTAR	rank_022	0.82	B-C	0.999091	C	A,3-10	SLIQKMAA	26.416	10.844	14.506
2client\AAA_analysis\newthreshold\Nathpaperpeptidesnonbinders\PLK1_output	2client	AAA	nonbinder	AASLIQKMAAADPTAR	rank_025	0.78	C-D	0.950385	D	A,5-12	IQKMAAAD	33.827	8.45	13.111		1client\AAA_analysis\newthreshold\Nathpaperpeptidesnonbinders\PLK1_output	1client	AAA	nonbinder	AASLIQKMAAADPTAR	rank_022	0.82	B-C	0.999091	C	A,3-10	SLIQKMAA	26.416	10.844	14.506
2client\fromGretchen\newthreshold\Nathpaperpeptidesnonbinders\NNB20\1LC8results	2client	WT	nonbinder	AASLIQKMLQTDPTAR	rank_001	0.92	C-D	0.882273	D	A,4-11	LIQKMLQT	97.345	1.185	1.777		1client\fromGretchen\newthreshold\Nathpaperpeptidesnonbinders\PLK1_output	1client	WT	nonbinder	AASLIQKMLQTDPTAR	rank_005	0.91	B-C	0.91375	B	A,4-11	LIQKMLQT	96.398	1.393	1.871
2client\fromGretchen\newthreshold\Nathpaperpeptidesnonbinders\NNB20\1LC8results	2client	WT	nonbinder	AASLIQKMLQTDPTAR	rank_001	0.92	C-D	0.882273	C	B,4-11	LIQKMLQT	97.166	1.216	1.892		1client\fromGretchen\newthreshold\Nathpaperpeptidesnonbinders\PLK1_output	1client	WT	nonbinder	AASLIQKMLQTDPTAR	rank_005	0.91	B-C	0.91375	B	A,4-11	LIQKMLQT	96.398	1.393	1.871
2client\fromGretchen\newthreshold\Nathpaperpeptidesnonbinders\NNB20\1LC8results	2client	WT	nonbinder	AASLIQKMLQTDPTAR	rank_002	0.91	C-D	0.890909	C	B,4-11	LIQKMLQT	97.109	1.256	1.723		1client\fromGretchen\newthreshold\Nathpaperpeptidesnonbinders\PLK1_output	1client	WT	nonbinder	AASLIQKMLQTDPTAR	rank_003	0.91	B-C	0.912917	B	A,4-11	LIQKMLQT	96.248	1.392	1.901
2client\fromGretchen\newthreshold\Nathpaperpeptidesnonbinders\NNB20\1LC8results	2client	WT	nonbinder	AASLIQKMLQTDPTAR	rank_002	0.91	C-D	0.890909	D	A,4-11	LIQKMLQT	97.046	1.267	1.741		1client\fromGretchen\newthreshold\Nathpaperpeptidesnonbinders\PLK1_output	1client	WT	nonbinder	AASLIQKMLQTDPTAR	rank_003	0.91	B-C	0.912917	B	A,4-11	LIQKMLQT	96.248	1.392	1.901
2client\fromGretchen\newthreshold\Nathpaperpeptidesnonbinders\NNB20\1LC8results	2client	WT	nonbinder	AASLIQKMLQTDPTAR	rank_008	0.91	C-D	0.887273	D	B,4-11	LIQKMLQT	96.898	1.251	1.959		1client\fromGretchen\newthreshold\Nathpaperpeptidesnonbinders\PLK1_output	1client	WT	nonbinder	AASLIQKMLQTDPTAR	rank_006	0.91	B-C	0.915417	B	A,4-11	LIQKMLQT	95.952	1.419	1.968
2client\fromGretchen\newthreshold\Nathpaperpeptidesnonbinders\NNB20\1LC8results	2client	WT	nonbinder	AASLIQKMLQTDPTAR	rank_008	0.91	C-D	0.887273	C	A,4-11	LIQKMLQT	96.881	1.246	1.96		1client\fromGretchen\newthreshold\Nathpaperpeptidesnonbinders\PLK1_output	1client	WT	nonbinder	AASLIQKMLQTDPTAR	rank_006	0.91	B-C	0.915417	B	A,4-11	LIQKMLQT	95.952	1.419	1.968
2client\fromGretchen\newthreshold\Nathpaperpeptidesnonbinders\NNB20\1LC8results	2client	WT	nonbinder	AASLIQKMLQTDPTAR	rank_004	0.91	C-D	0.890455	C	A,4-11	LIQKMLQT	96.851	1.262	1.764		1client\fromGretchen\newthreshold\Nathpaperpeptidesnonbinders\PLK1_output	1client	WT	nonbinder	AASLIQKMLQTDPTAR	rank_008	0.91	B-C	0.915385	B	A,4-11	LIQKMLQT	95.859	1.41	1.988
2client\fromGretchen\newthreshold\Nathpaperpeptidesnonbinders\NNB20\1LC8results	2client	WT	nonbinder	AASLIQKMLQTDPTAR	rank_004	0.91	C-D	0.890455	D	B,4-11	LIQKMLQT	96.75	1.283	1.801		1client\fromGretchen\newthreshold\Nathpaperpeptidesnonbinders\PLK1_output	1client	WT	nonbinder	AASLIQKMLQTDPTAR	rank_008	0.91	B-C	0.915385	B	A,4-11	LIQKMLQT	95.859	1.41	1.988
2client\fromGretchen\newthreshold\Nathpaperpeptidesnonbinders\NNB20\1LC8results	2client	WT	nonbinder	AASLIQKMLQTDPTAR	rank_005	0.91	C-D	0.889091	C	A,4-11	LIQKMLQT	96.719	1.279	2.035		1client\fromGretchen\newthreshold\Nathpaperpeptidesnonbinders\PLK1_output	1client	WT	nonbinder	AASLIQKMLQTDPTAR	rank_001	0.91	B-C	0.910833	B	A,4-11	LIQKMLQT	95.64	1.498	2.389
2client\fromGretchen\newthreshold\Nathpaperpeptidesnonbinders\NNB20\1LC8results	2client	WT	nonbinder	AASLIQKMLQTDPTAR	rank_005	0.91	C-D	0.889091	D	B,4-11	LIQKMLQT	96.43	1.324	2.157		1client\fromGretchen\newthreshold\Nathpaperpeptidesnonbinders\PLK1_output	1client	WT	nonbinder	AASLIQKMLQTDPTAR	rank_001	0.91	B-C	0.910833	B	A,4-11	LIQKMLQT	95.64	1.498	2.389
2client\fromGretchen\newthreshold\Nathpaperpeptidesnonbinders\NNB20\1LC8results	2client	WT	nonbinder	AASLIQKMLQTDPTAR	rank_003	0.91	C-D	0.894583	D	B,4-11	LIQKMLQT	96.679	1.277	1.8		1client\fromGretchen\newthreshold\Nathpaperpeptidesnonbinders\PLK1_output	1client	WT	nonbinder	AASLIQKMLQTDPTAR	rank_009	0.91	B-C	0.91375	B	A,4-11	LIQKMLQT	95.619	1.47	2.02
2client\fromGretchen\newthreshold\Nathpaperpeptidesnonbinders\NNB20\1LC8results	2client	WT	nonbinder	AASLIQKMLQTDPTAR	rank_003	0.91	C-D	0.894583	C	A,4-11	LIQKMLQT	96.649	1.276	1.793		1client\fromGretchen\newthreshold\Nathpaperpeptidesnonbinders\PLK1_output	1client	WT	nonbinder	AASLIQKMLQTDPTAR	rank_009	0.91	B-C	0.91375	B	A,4-11	LIQKMLQT	95.619	1.47	2.02
2client\fromGretchen\newthreshold\Nathpaperpeptidesnonbinders\NNB20\1LC8results	2client	WT	nonbinder	AASLIQKMLQTDPTAR	rank_012	0.91	C-D	0.896364	C	A,4-11	LIQKMLQT	96.64	1.295	1.784		1client\fromGretchen\newthreshold\Nathpaperpeptidesnonbinders\PLK1_output	1client	WT	nonbinder	AASLIQKMLQTDPTAR	rank_002	0.91	B-C	0.9125	B	A,4-11	LIQKMLQT	95.354	1.539	2.508
2client\fromGretchen\newthreshold\Nathpaperpeptidesnonbinders\NNB20\1LC8results	2client	WT	nonbinder	AASLIQKMLQTDPTAR	rank_012	0.91	C-D	0.896364	D	B,4-11	LIQKMLQT	96.539	1.304	1.799		1client\fromGretchen\newthreshold\Nathpaperpeptidesnonbinders\PLK1_output	1client	WT	nonbinder	AASLIQKMLQTDPTAR	rank_002	0.91	B-C	0.9125	B	A,4-11	LIQKMLQT	95.354	1.539	2.508
2client\fromGretchen\newthreshold\Nathpaperpeptidesnonbinders\NNB20\1LC8results	2client	WT	nonbinder	AASLIQKMLQTDPTAR	rank_011	0.91	C-D	0.891538	D	B,4-11	LIQKMLQT	96.493	1.294	1.833		1client\fromGretchen\newthreshold\Nathpaperpeptidesnonbinders\PLK1_output	1client	WT	nonbinder	AASLIQKMLQTDPTAR	rank_004	0.91	B-C	0.915	B	A,4-11	LIQKMLQT	95.14	1.579	2.565
2client\fromGretchen\newthreshold\Nathpaperpeptidesnonbinders\NNB20\1LC8results	2client	WT	nonbinder	AASLIQKMLQTDPTAR	rank_011	0.91	C-D	0.891538	C	A,4-11	LIQKMLQT	96.47	1.293	1.833		1client\fromGretchen\newthreshold\Nathpaperpeptidesnonbinders\PLK1_output	1client	WT	nonbinder	AASLIQKMLQTDPTAR	rank_004	0.91	B-C	0.915	B	A,4-11	LIQKMLQT	95.14	1.579	2.565
2client\fromGretchen\newthreshold\Nathpaperpeptidesnonbinders\NNB20\1LC8results	2client	WT	nonbinder	AASLIQKMLQTDPTAR	rank_006	0.91	C-D	0.900455	C	A,4-11	LIQKMLQT	96.485	1.303	1.835		1client\fromGretchen\newthreshold\Nathpaperpeptidesnonbinders\PLK1_output	1client	WT	nonbinder	AASLIQKMLQTDPTAR	rank_010	0.91	B-C	0.921538	C	A,4-11	LIQKMLQT	94.32	1.552	2.736
2client\fromGretchen\newthreshold\Nathpaperpeptidesnonbinders\NNB20\1LC8results	2client	WT	nonbinder	AASLIQKMLQTDPTAR	rank_006	0.91	C-D	0.900455	D	B,4-11	LIQKMLQT	96.46	1.307	1.847		1client\fromGretchen\newthreshold\Nathpaperpeptidesnonbinders\PLK1_output	1client	WT	nonbinder	AASLIQKMLQTDPTAR	rank_010	0.91	B-C	0.921538	C	A,4-11	LIQKMLQT	94.32	1.552	2.736
2client\fromGretchen\newthreshold\Nathpaperpeptidesnonbinders\NNB20\1LC8results	2client	WT	nonbinder	AASLIQKMLQTDPTAR	rank_014	0.91	C-D	0.888077	C	B,4-11	LIQKMLQT	96.461	1.287	1.817		1client\fromGretchen\newthreshold\Nathpaperpeptidesnonbinders\PLK1_output	1client	WT	nonbinder	AASLIQKMLQTDPTAR	rank_007	0.91	B-C	0.926923	B	A,4-11	LIQKMLQT	93.866	1.647	2.898
2client\fromGretchen\newthreshold\Nathpaperpeptidesnonbinders\NNB20\1LC8results	2client	WT	nonbinder	AASLIQKMLQTDPTAR	rank_014	0.91	C-D	0.888077	D	A,4-11	LIQKMLQT	96.446	1.283	1.807		1client\fromGretchen\newthreshold\Nathpaperpeptidesnonbinders\PLK1_output	1client	WT	nonbinder	AASLIQKMLQTDPTAR	rank_007	0.91	B-C	0.926923	B	A,4-11	LIQKMLQT	93.866	1.647	2.898
2client\fromGretchen\newthreshold\Nathpaperpeptidesnonbinders\NNB20\1LC8results	2client	WT	nonbinder	AASLIQKMLQTDPTAR	rank_013	0.91	C-D	0.898077	D	A,4-11	LIQKMLQT	96.259	1.317	1.88		1client\fromGretchen\newthreshold\Nathpaperpeptidesnonbinders\PLK1_output	1client	WT	nonbinder	AASLIQKMLQTDPTAR	rank_011	0.91	B-C	0.918077	C	A,4-11	LIQKMLQT	93.478	1.661	2.487
2client\fromGretchen\newthreshold\Nathpaperpeptidesnonbinders\NNB20\1LC8results	2client	WT	nonbinder	AASLIQKMLQTDPTAR	rank_013	0.91	C-D	0.898077	C	B,4-11	LIQKMLQT	95.546	1.389	2.043		1client\fromGretchen\newthreshold\Nathpaperpeptidesnonbinders\PLK1_output	1client	WT	nonbinder	AASLIQKMLQTDPTAR	rank_011	0.91	B-C	0.918077	C	A,4-11	LIQKMLQT	93.478	1.661	2.487
2client\fromGretchen\newthreshold\Nathpaperpeptidesnonbinders\NNB20\1LC8results	2client	WT	nonbinder	AASLIQKMLQTDPTAR	rank_010	0.91	C-D	0.892727	C	A,4-11	LIQKMLQT	96.243	1.305	2.142		1client\fromGretchen\newthreshold\Nathpaperpeptidesnonbinders\PLK1_output	1client	WT	nonbinder	AASLIQKMLQTDPTAR	rank_015	0.9	B-C	0.920769	C	A,4-11	LIQKMLQT	93.32	1.672	2.662
2client\fromGretchen\newthreshold\Nathpaperpeptidesnonbinders\NNB20\1LC8results	2client	WT	nonbinder	AASLIQKMLQTDPTAR	rank_010	0.91	C-D	0.892727	D	B,4-11	LIQKMLQT	96.164	1.317	2.182		1client\fromGretchen\newthreshold\Nathpaperpeptidesnonbinders\PLK1_output	1client	WT	nonbinder	AASLIQKMLQTDPTAR	rank_015	0.9	B-C	0.920769	C	A,4-11	LIQKMLQT	93.32	1.672	2.662
2client\fromGretchen\newthreshold\Nathpaperpeptidesnonbinders\NNB20\1LC8results	2client	WT	nonbinder	AASLIQKMLQTDPTAR	rank_015	0.91	C-D	0.898077	C	A,4-11	LIQKMLQT	96.101	1.313	1.89		1client\fromGretchen\newthreshold\Nathpaperpeptidesnonbinders\PLK1_output	1client	WT	nonbinder	AASLIQKMLQTDPTAR	rank_012	0.91	B-C	0.920385	C	A,4-11	LIQKMLQT	93.29	1.645	2.516
2client\fromGretchen\newthreshold\Nathpaperpeptidesnonbinders\NNB20\1LC8results	2client	WT	nonbinder	AASLIQKMLQTDPTAR	rank_015	0.91	C-D	0.898077	D	B,4-11	LIQKMLQT	96.062	1.318	1.905		1client\fromGretchen\newthreshold\Nathpaperpeptidesnonbinders\PLK1_output	1client	WT	nonbinder	AASLIQKMLQTDPTAR	rank_012	0.91	B-C	0.920385	C	A,4-11	LIQKMLQT	93.29	1.645	2.516
2client\fromGretchen\newthreshold\Nathpaperpeptidesnonbinders\NNB20\1LC8results	2client	WT	nonbinder	AASLIQKMLQTDPTAR	rank_016	0.9	C-D	0.898077	C	B,4-11	LIQKMLQT	96.079	1.349	1.963		1client\fromGretchen\newthreshold\Nathpaperpeptidesnonbinders\PLK1_output	1client	WT	nonbinder	AASLIQKMLQTDPTAR	rank_014	0.9	B-C	0.921818	C	A,4-11	LIQKMLQT	93.1	1.83	2.86
2client\fromGretchen\newthreshold\Nathpaperpeptidesnonbinders\NNB20\1LC8results	2client	WT	nonbinder	AASLIQKMLQTDPTAR	rank_016	0.9	C-D	0.898077	D	A,4-11	LIQKMLQT	95.994	1.358	1.963		1client\fromGretchen\newthreshold\Nathpaperpeptidesnonbinders\PLK1_output	1client	WT	nonbinder	AASLIQKMLQTDPTAR	rank_014	0.9	B-C	0.921818	C	A,4-11	LIQKMLQT	93.1	1.83	2.86
2client\fromGretchen\newthreshold\Nathpaperpeptidesnonbinders\NNB20\1LC8results	2client	WT	nonbinder	AASLIQKMLQTDPTAR	rank_009	0.91	C-D	0.896154	D	B,4-11	LIQKMLQT	96.055	1.355	1.94		1client\fromGretchen\newthreshold\Nathpaperpeptidesnonbinders\PLK1_output	1client	WT	nonbinder	AASLIQKMLQTDPTAR	rank_016	0.9	B-C	0.932308	B	A,4-11	LIQKMLQT	92.96	1.768	2.804
2client\fromGretchen\newthreshold\Nathpaperpeptidesnonbinders\NNB20\1LC8results	2client	WT	nonbinder	AASLIQKMLQTDPTAR	rank_009	0.91	C-D	0.896154	C	A,4-11	LIQKMLQT	96.031	1.356	1.93		1client\fromGretchen\newthreshold\Nathpaperpeptidesnonbinders\PLK1_output	1client	WT	nonbinder	AASLIQKMLQTDPTAR	rank_016	0.9	B-C	0.932308	B	A,4-11	LIQKMLQT	92.96	1.768	2.804
2client\fromGretchen\newthreshold\Nathpaperpeptidesnonbinders\NNB20\1LC8results	2client	WT	nonbinder	AASLIQKMLQTDPTAR	rank_007	0.91	C-D	0.898636	D	B,4-11	LIQKMLQT	95.579	1.425	2.407		1client\fromGretchen\newthreshold\Nathpaperpeptidesnonbinders\PLK1_output	1client	WT	nonbinder	AASLIQKMLQTDPTAR	rank_013	0.9	B-C	0.928846	B	A,4-11	LIQKMLQT	92.71	1.796	2.682
2client\fromGretchen\newthreshold\Nathpaperpeptidesnonbinders\NNB20\1LC8results	2client	WT	nonbinder	AASLIQKMLQTDPTAR	rank_007	0.91	C-D	0.898636	C	A,4-11	LIQKMLQT	95.509	1.411	2.428		1client\fromGretchen\newthreshold\Nathpaperpeptidesnonbinders\PLK1_output	1client	WT	nonbinder	AASLIQKMLQTDPTAR	rank_013	0.9	B-C	0.928846	B	A,4-11	LIQKMLQT	92.71	1.796	2.682
2client\fromGretchen\newthreshold\Nathpaperpeptidesnonbinders\NNB20\1LC8results	2client	WT	nonbinder	AASLIQKMLQTDPTAR	rank_017	0.9	C-D	0.911923	D	A,4-11	LIQKMLQT	94.963	1.452	2.086		1client\fromGretchen\newthreshold\Nathpaperpeptidesnonbinders\PLK1_output	1client	WT	nonbinder	AASLIQKMLQTDPTAR	rank_017	0.9	B-C	0.943462	C	A,4-11	LIQKMLQT	90.868	2.006	3.09
2client\fromGretchen\newthreshold\Nathpaperpeptidesnonbinders\NNB20\1LC8results	2client	WT	nonbinder	AASLIQKMLQTDPTAR	rank_017	0.9	C-D	0.911923	C	B,4-11	LIQKMLQT	94.936	1.446	2.087		1client\fromGretchen\newthreshold\Nathpaperpeptidesnonbinders\PLK1_output	1client	WT	nonbinder	AASLIQKMLQTDPTAR	rank_017	0.9	B-C	0.943462	C	A,4-11	LIQKMLQT	90.868	2.006	3.09
2client\fromGretchen\newthreshold\Nathpaperpeptidesnonbinders\NNB20\1LC8results	2client	WT	nonbinder	AASLIQKMLQTDPTAR	rank_018	0.9	C-D	0.916923	C	A,4-11	LIQKMLQT	94.844	1.453	2.093		1client\fromGretchen\newthreshold\Nathpaperpeptidesnonbinders\PLK1_output	1client	WT	nonbinder	AASLIQKMLQTDPTAR	rank_019	0.9	B-C	0.934231	C	A,4-11	LIQKMLQT	90.531	1.964	3.105
2client\fromGretchen\newthreshold\Nathpaperpeptidesnonbinders\NNB20\1LC8results	2client	WT	nonbinder	AASLIQKMLQTDPTAR	rank_018	0.9	C-D	0.916923	D	B,4-11	LIQKMLQT	94.82	1.468	2.107		1client\fromGretchen\newthreshold\Nathpaperpeptidesnonbinders\PLK1_output	1client	WT	nonbinder	AASLIQKMLQTDPTAR	rank_019	0.9	B-C	0.934231	C	A,4-11	LIQKMLQT	90.531	1.964	3.105
2client\fromGretchen\newthreshold\Nathpaperpeptidesnonbinders\NNB20\1LC8results	2client	WT	nonbinder	AASLIQKMLQTDPTAR	rank_020	0.9	C-D	0.898077	C	B,4-11	LIQKMLQT	94.812	1.461	2.246		1client\fromGretchen\newthreshold\Nathpaperpeptidesnonbinders\PLK1_output	1client	WT	nonbinder	AASLIQKMLQTDPTAR	rank_018	0.9	B-C	0.942692	C	A,4-11	LIQKMLQT	90.351	2.125	3.218
2client\fromGretchen\newthreshold\Nathpaperpeptidesnonbinders\NNB20\1LC8results	2client	WT	nonbinder	AASLIQKMLQTDPTAR	rank_020	0.9	C-D	0.898077	D	A,4-11	LIQKMLQT	94.732	1.46	2.278		1client\fromGretchen\newthreshold\Nathpaperpeptidesnonbinders\PLK1_output	1client	WT	nonbinder	AASLIQKMLQTDPTAR	rank_018	0.9	B-C	0.942692	C	A,4-11	LIQKMLQT	90.351	2.125	3.218
2client\fromGretchen\newthreshold\Nathpaperpeptidesnonbinders\NNB20\1LC8results	2client	WT	nonbinder	AASLIQKMLQTDPTAR	rank_023	0.9	C-D	0.914615	C	A,4-11	LIQKMLQT	94.807	1.411	2.062		1client\fromGretchen\newthreshold\Nathpaperpeptidesnonbinders\PLK1_output	1client	WT	nonbinder	AASLIQKMLQTDPTAR	rank_021	0.9	B-C	0.926818	B	A,4-11	LIQKMLQT	89.655	2.382	3.851
2client\fromGretchen\newthreshold\Nathpaperpeptidesnonbinders\NNB20\1LC8results	2client	WT	nonbinder	AASLIQKMLQTDPTAR	rank_023	0.9	C-D	0.914615	D	B,4-11	LIQKMLQT	94.573	1.44	2.114		1client\fromGretchen\newthreshold\Nathpaperpeptidesnonbinders\PLK1_output	1client	WT	nonbinder	AASLIQKMLQTDPTAR	rank_021	0.9	B-C	0.926818	B	A,4-11	LIQKMLQT	89.655	2.382	3.851
2client\fromGretchen\newthreshold\Nathpaperpeptidesnonbinders\NNB20\1LC8results	2client	WT	nonbinder	AASLIQKMLQTDPTAR	rank_019	0.9	C-D	0.915	D	A,4-11	LIQKMLQT	94.751	1.465	2.115		1client\fromGretchen\newthreshold\Nathpaperpeptidesnonbinders\PLK1_output	1client	WT	nonbinder	AASLIQKMLQTDPTAR	rank_020	0.9	B-C	0.96	B	A,4-11	LIQKMLQT	89.344	2.3	3.543
2client\fromGretchen\newthreshold\Nathpaperpeptidesnonbinders\NNB20\1LC8results	2client	WT	nonbinder	AASLIQKMLQTDPTAR	rank_019	0.9	C-D	0.915	C	B,4-11	LIQKMLQT	94.679	1.464	2.122		1client\fromGretchen\newthreshold\Nathpaperpeptidesnonbinders\PLK1_output	1client	WT	nonbinder	AASLIQKMLQTDPTAR	rank_020	0.9	B-C	0.96	B	A,4-11	LIQKMLQT	89.344	2.3	3.543
2client\fromGretchen\newthreshold\Nathpaperpeptidesnonbinders\NNB20\1LC8results	2client	WT	nonbinder	AASLIQKMLQTDPTAR	rank_022	0.9	C-D	0.893462	D	A,4-11	LIQKMLQT	94.625	1.485	2.333		1client\fromGretchen\newthreshold\Nathpaperpeptidesnonbinders\PLK1_output	1client	WT	nonbinder	AASLIQKMLQTDPTAR	rank_022	0.89	B-C	0.952917	B	A,4-11	LIQKMLQT	87.009	2.916	4.411
2client\fromGretchen\newthreshold\Nathpaperpeptidesnonbinders\NNB20\1LC8results	2client	WT	nonbinder	AASLIQKMLQTDPTAR	rank_022	0.9	C-D	0.893462	C	B,4-11	LIQKMLQT	94.578	1.498	2.354		1client\fromGretchen\newthreshold\Nathpaperpeptidesnonbinders\PLK1_output	1client	WT	nonbinder	AASLIQKMLQTDPTAR	rank_022	0.89	B-C	0.952917	B	A,4-11	LIQKMLQT	87.009	2.916	4.411
2client\fromGretchen\newthreshold\Nathpaperpeptidesnonbinders\NNB20\1LC8results	2client	WT	nonbinder	AASLIQKMLQTDPTAR	rank_021	0.9	C-D	0.898846	C	A,4-11	LIQKMLQT	94.366	1.545	2.374		1client\fromGretchen\newthreshold\Nathpaperpeptidesnonbinders\PLK1_output	1client	WT	nonbinder	AASLIQKMLQTDPTAR	rank_023	0.89	B-C	0.952083	B	A,4-11	LIQKMLQT	84.735	3.487	5.278
2client\fromGretchen\newthreshold\Nathpaperpeptidesnonbinders\NNB20\1LC8results	2client	WT	nonbinder	AASLIQKMLQTDPTAR	rank_021	0.9	C-D	0.898846	D	B,4-11	LIQKMLQT	94.023	1.592	2.478		1client\fromGretchen\newthreshold\Nathpaperpeptidesnonbinders\PLK1_output	1client	WT	nonbinder	AASLIQKMLQTDPTAR	rank_023	0.89	B-C	0.952083	B	A,4-11	LIQKMLQT	84.735	3.487	5.278
2client\fromGretchen\newthreshold\Nathpaperpeptidesnonbinders\NNB20\1LC8results	2client	WT	nonbinder	AASLIQKMLQTDPTAR	rank_025	0.9	C-D	0.898846	D	B,4-11	LIQKMLQT	93.953	1.542	2.495		1client\fromGretchen\newthreshold\Nathpaperpeptidesnonbinders\PLK1_output	1client	WT	nonbinder	AASLIQKMLQTDPTAR	rank_024	0.83	B-C	0.99125	B	A,5-12	IQKMLQTD	34.487	10.354	13.07
2client\fromGretchen\newthreshold\Nathpaperpeptidesnonbinders\NNB20\1LC8results	2client	WT	nonbinder	AASLIQKMLQTDPTAR	rank_025	0.9	C-D	0.898846	C	A,4-11	LIQKMLQT	93.897	1.545	2.507		1client\fromGretchen\newthreshold\Nathpaperpeptidesnonbinders\PLK1_output	1client	WT	nonbinder	AASLIQKMLQTDPTAR	rank_024	0.83	B-C	0.99125	B	A,5-12	IQKMLQTD	34.487	10.354	13.07
2client\fromGretchen\newthreshold\Nathpaperpeptidesnonbinders\NNB20\1LC8results	2client	WT	nonbinder	AASLIQKMLQTDPTAR	rank_024	0.9	C-D	0.933462	C	A,4-11	LIQKMLQT	93.545	1.604	2.371		1client\fromGretchen\newthreshold\Nathpaperpeptidesnonbinders\PLK1_output	1client	WT	nonbinder	AASLIQKMLQTDPTAR	rank_025	0.82	B-C	0.989583	B	A,6-13	QKMLQTDP	32.511	10.811	13.445
2client\fromGretchen\newthreshold\Nathpaperpeptidesnonbinders\NNB20\1LC8results	2client	WT	nonbinder	AASLIQKMLQTDPTAR	rank_024	0.9	C-D	0.933462	D	B,4-11	LIQKMLQT	93.329	1.621	2.417		1client\fromGretchen\newthreshold\Nathpaperpeptidesnonbinders\PLK1_output	1client	WT	nonbinder	AASLIQKMLQTDPTAR	rank_025	0.82	B-C	0.989583	B	A,6-13	QKMLQTDP	32.511	10.811	13.445
postGMF-runs\2client\WT_analysis\more_scans\OFD1\OFD1_721-736_output	2client	WT	unknown	AASRLRGGTSSRRLSS	rank_005	0.8	C-D	1.00923	C	A,6-13	RGGTSSRR	55.475	6.95	10.507		postGMF-runs\1client\WT_analysis\more_scans\OFD1\OFD1_721-736_output	1client	WT	unknown	AASRLRGGTSSRRLSS	rank_016	0.81	B-C	0.987	C	A,4-11	RLRGGTSS	37.384	9.872	12.288
postGMF-runs\2client\WT_analysis\more_scans\OFD1\OFD1_721-736_output	2client	WT	unknown	AASRLRGGTSSRRLSS	rank_005	0.8	C-D	1.00923	D	B,6-13	RGGTSSRR	54.591	7.082	10.57		postGMF-runs\1client\WT_analysis\more_scans\OFD1\OFD1_721-736_output	1client	WT	unknown	AASRLRGGTSSRRLSS	rank_016	0.81	B-C	0.987	C	A,4-11	RLRGGTSS	37.384	9.872	12.288
postGMF-runs\2client\WT_analysis\more_scans\OFD1\OFD1_721-736_output	2client	WT	unknown	AASRLRGGTSSRRLSS	rank_004	0.8	C-D	0.995385	D	A,5-12	LRGGTSSR	54.52	6.99	9.825		postGMF-runs\1client\WT_analysis\more_scans\OFD1\OFD1_721-736_output	1client	WT	unknown	AASRLRGGTSSRRLSS	rank_010	0.82	B-C	1.00417	C	A,5-12	LRGGTSSR	35.883	10.868	12.918
postGMF-runs\2client\WT_analysis\more_scans\OFD1\OFD1_721-736_output	2client	WT	unknown	AASRLRGGTSSRRLSS	rank_004	0.8	C-D	0.995385	C	B,5-12	LRGGTSSR	53.926	7.029	9.881		postGMF-runs\1client\WT_analysis\more_scans\OFD1\OFD1_721-736_output	1client	WT	unknown	AASRLRGGTSSRRLSS	rank_010	0.82	B-C	1.00417	C	A,5-12	LRGGTSSR	35.883	10.868	12.918
postGMF-runs\2client\WT_analysis\more_scans\OFD1\OFD1_721-736_output	2client	WT	unknown	AASRLRGGTSSRRLSS	rank_002	0.8	C-D	0.98625	C	A,7-14	GGTSSRRL	53.96	5.485	9.486		postGMF-runs\1client\WT_analysis\more_scans\OFD1\OFD1_721-736_output	1client	WT	unknown	AASRLRGGTSSRRLSS	rank_001	0.83	B-C	1.00818	C	A,6-13	RGGTSSRR	35.792	7.877	11.593
postGMF-runs\2client\WT_analysis\more_scans\OFD1\OFD1_721-736_output	2client	WT	unknown	AASRLRGGTSSRRLSS	rank_002	0.8	C-D	0.98625	D	B,6-13	RGGTSSRR	41.481	7.614	11.512		postGMF-runs\1client\WT_analysis\more_scans\OFD1\OFD1_721-736_output	1client	WT	unknown	AASRLRGGTSSRRLSS	rank_001	0.83	B-C	1.00818	C	A,6-13	RGGTSSRR	35.792	7.877	11.593
postGMF-runs\2client\WT_analysis\more_scans\OFD1\OFD1_721-736_output	2client	WT	unknown	AASRLRGGTSSRRLSS	rank_003	0.8	C-D	0.947727	D	A,4-11	RLRGGTSS	53.74	6.437	10.154		postGMF-runs\1client\WT_analysis\more_scans\OFD1\OFD1_721-736_output	1client	WT	unknown	AASRLRGGTSSRRLSS	rank_019	0.81	B-C	1.05955	C	A,5-12	LRGGTSSR	34.334	9.262	12.094
postGMF-runs\2client\WT_analysis\more_scans\OFD1\OFD1_721-736_output	2client	WT	unknown	AASRLRGGTSSRRLSS	rank_003	0.8	C-D	0.947727	C	B,4-11	RLRGGTSS	53.488	6.464	10.196		postGMF-runs\1client\WT_analysis\more_scans\OFD1\OFD1_721-736_output	1client	WT	unknown	AASRLRGGTSSRRLSS	rank_019	0.81	B-C	1.05955	C	A,5-12	LRGGTSSR	34.334	9.262	12.094
postGMF-runs\2client\WT_analysis\more_scans\OFD1\OFD1_721-736_output	2client	WT	unknown	AASRLRGGTSSRRLSS	rank_010	0.79	C-D	0.99	D	A,4-11	RLRGGTSS	52.985	6.517	10.226		postGMF-runs\1client\WT_analysis\more_scans\OFD1\OFD1_721-736_output	1client	WT	unknown	AASRLRGGTSSRRLSS	rank_018	0.81	B-C	1.03455	C	A,5-12	LRGGTSSR	33.904	9.303	11.916
postGMF-runs\2client\WT_analysis\more_scans\OFD1\OFD1_721-736_output	2client	WT	unknown	AASRLRGGTSSRRLSS	rank_010	0.79	C-D	0.99	C	B,4-11	RLRGGTSS	52.914	6.473	10.183		postGMF-runs\1client\WT_analysis\more_scans\OFD1\OFD1_721-736_output	1client	WT	unknown	AASRLRGGTSSRRLSS	rank_018	0.81	B-C	1.03455	C	A,5-12	LRGGTSSR	33.904	9.303	11.916
postGMF-runs\2client\WT_analysis\more_scans\OFD1\OFD1_721-736_output	2client	WT	unknown	AASRLRGGTSSRRLSS	rank_001	0.8	C-D	1.01	D	A,6-13	RGGTSSRR	52.925	6.157	10.127		postGMF-runs\1client\WT_analysis\more_scans\OFD1\OFD1_721-736_output	1client	WT	unknown	AASRLRGGTSSRRLSS	rank_023	0.81	B-C	1.012	B	A,5-12	LRGGTSSR	33.75	11.168	13.108
postGMF-runs\2client\WT_analysis\more_scans\OFD1\OFD1_721-736_output	2client	WT	unknown	AASRLRGGTSSRRLSS	rank_001	0.8	C-D	1.01	C	B,6-13	RGGTSSRR	52.524	6.232	10.151		postGMF-runs\1client\WT_analysis\more_scans\OFD1\OFD1_721-736_output	1client	WT	unknown	AASRLRGGTSSRRLSS	rank_023	0.81	B-C	1.012	B	A,5-12	LRGGTSSR	33.75	11.168	13.108
postGMF-runs\2client\WT_analysis\more_scans\OFD1\OFD1_721-736_output	2client	WT	unknown	AASRLRGGTSSRRLSS	rank_006	0.8	C-D	1.0365	C	A,6-13	RGGTSSRR	50.913	5.95	10.105		postGMF-runs\1client\WT_analysis\more_scans\OFD1\OFD1_721-736_output	1client	WT	unknown	AASRLRGGTSSRRLSS	rank_007	0.82	B-C	1.02636	B	A,5-12	LRGGTSSR	33.607	8.77	11.979
postGMF-runs\2client\WT_analysis\more_scans\OFD1\OFD1_721-736_output	2client	WT	unknown	AASRLRGGTSSRRLSS	rank_006	0.8	C-D	1.0365	D	B,6-13	RGGTSSRR	49.68	6.138	10.273		postGMF-runs\1client\WT_analysis\more_scans\OFD1\OFD1_721-736_output	1client	WT	unknown	AASRLRGGTSSRRLSS	rank_007	0.82	B-C	1.02636	B	A,5-12	LRGGTSSR	33.607	8.77	11.979
postGMF-runs\2client\WT_analysis\more_scans\OFD1\OFD1_721-736_output	2client	WT	unknown	AASRLRGGTSSRRLSS	rank_007	0.79	C-D	1.00136	C	B,4-11	RLRGGTSS	49.476	5.513	9.87		postGMF-runs\1client\WT_analysis\more_scans\OFD1\OFD1_721-736_output	1client	WT	unknown	AASRLRGGTSSRRLSS	rank_017	0.81	B-C	1.02727	C	A,5-12	LRGGTSSR	33.47	9.042	12.283
postGMF-runs\2client\WT_analysis\more_scans\OFD1\OFD1_721-736_output	2client	WT	unknown	AASRLRGGTSSRRLSS	rank_007	0.79	C-D	1.00136	D	A,4-11	RLRGGTSS	48.789	5.581	10.028		postGMF-runs\1client\WT_analysis\more_scans\OFD1\OFD1_721-736_output	1client	WT	unknown	AASRLRGGTSSRRLSS	rank_017	0.81	B-C	1.02727	C	A,5-12	LRGGTSSR	33.47	9.042	12.283
postGMF-runs\2client\WT_analysis\more_scans\OFD1\OFD1_721-736_output	2client	WT	unknown	AASRLRGGTSSRRLSS	rank_013	0.78	C-D	0.986923	C	A,5-12	LRGGTSSR	48.454	7.695	10.572		postGMF-runs\1client\WT_analysis\more_scans\OFD1\OFD1_721-736_output	1client	WT	unknown	AASRLRGGTSSRRLSS	rank_002	0.82	B-C	1.005	C	A,4-11	RLRGGTSS	31.851	7.864	12.211
postGMF-runs\2client\WT_analysis\more_scans\OFD1\OFD1_721-736_output	2client	WT	unknown	AASRLRGGTSSRRLSS	rank_013	0.78	C-D	0.986923	D	B,5-12	LRGGTSSR	47.086	7.857	10.948		postGMF-runs\1client\WT_analysis\more_scans\OFD1\OFD1_721-736_output	1client	WT	unknown	AASRLRGGTSSRRLSS	rank_002	0.82	B-C	1.005	C	A,4-11	RLRGGTSS	31.851	7.864	12.211
postGMF-runs\2client\WT_analysis\more_scans\OFD1\OFD1_721-736_output	2client	WT	unknown	AASRLRGGTSSRRLSS	rank_014	0.78	C-D	1.00136	C	A,4-11	RLRGGTSS	45.785	6.686	10.937		postGMF-runs\1client\WT_analysis\more_scans\OFD1\OFD1_721-736_output	1client	WT	unknown	AASRLRGGTSSRRLSS	rank_020	0.81	B-C	1.0435	B	A,5-12	LRGGTSSR	30.737	9.637	13.326
postGMF-runs\2client\WT_analysis\more_scans\OFD1\OFD1_721-736_output	2client	WT	unknown	AASRLRGGTSSRRLSS	rank_014	0.78	C-D	1.00136	D	B,4-11	RLRGGTSS	45.293	6.747	10.977		postGMF-runs\1client\WT_analysis\more_scans\OFD1\OFD1_721-736_output	1client	WT	unknown	AASRLRGGTSSRRLSS	rank_020	0.81	B-C	1.0435	B	A,5-12	LRGGTSSR	30.737	9.637	13.326
postGMF-runs\2client\WT_analysis\more_scans\OFD1\OFD1_721-736_output	2client	WT	unknown	AASRLRGGTSSRRLSS	rank_011	0.78	C-D	1.00227	C	B,4-11	RLRGGTSS	43.384	6.48	10.529		postGMF-runs\1client\WT_analysis\more_scans\OFD1\OFD1_721-736_output	1client	WT	unknown	AASRLRGGTSSRRLSS	rank_008	0.82	B-C	0.995	C	A,5-12	LRGGTSSR	29.969	10.546	12.989
postGMF-runs\2client\WT_analysis\more_scans\OFD1\OFD1_721-736_output	2client	WT	unknown	AASRLRGGTSSRRLSS	rank_011	0.78	C-D	1.00227	D	A,4-11	RLRGGTSS	40.595	6.365	10.73		postGMF-runs\1client\WT_analysis\more_scans\OFD1\OFD1_721-736_output	1client	WT	unknown	AASRLRGGTSSRRLSS	rank_008	0.82	B-C	0.995	C	A,5-12	LRGGTSSR	29.969	10.546	12.989
postGMF-runs\2client\WT_analysis\more_scans\OFD1\OFD1_721-736_output	2client	WT	unknown	AASRLRGGTSSRRLSS	rank_008	0.79	C-D	0.978636	D	A,6-13	RGGTSSRR	41.149	6.3	10.632		postGMF-runs\1client\WT_analysis\more_scans\OFD1\OFD1_721-736_output	1client	WT	unknown	AASRLRGGTSSRRLSS	rank_006	0.82	B-C	0.967083	C	A,5-12	LRGGTSSR	28.687	10.884	14.241
postGMF-runs\2client\WT_analysis\more_scans\OFD1\OFD1_721-736_output	2client	WT	unknown	AASRLRGGTSSRRLSS	rank_008	0.79	C-D	0.978636	C	B,6-13	RGGTSSRR	37.615	6.976	11.109		postGMF-runs\1client\WT_analysis\more_scans\OFD1\OFD1_721-736_output	1client	WT	unknown	AASRLRGGTSSRRLSS	rank_006	0.82	B-C	0.967083	C	A,5-12	LRGGTSSR	28.687	10.884	14.241
postGMF-runs\2client\WT_analysis\more_scans\OFD1\OFD1_721-736_output	2client	WT	unknown	AASRLRGGTSSRRLSS	rank_009	0.79	C-D	1.00182	D	B,6-13	RGGTSSRR	41.118	6.118	10.841		postGMF-runs\1client\WT_analysis\more_scans\OFD1\OFD1_721-736_output	1client	WT	unknown	AASRLRGGTSSRRLSS	rank_025	0.81	B-C	1.006	B	A,6-13	RGGTSSRR	28.509	11.716	14.362
postGMF-runs\2client\WT_analysis\more_scans\OFD1\OFD1_721-736_output	2client	WT	unknown	AASRLRGGTSSRRLSS	rank_009	0.79	C-D	1.00182	C	A,6-13	RGGTSSRR	40.68	6.226	10.928		postGMF-runs\1client\WT_analysis\more_scans\OFD1\OFD1_721-736_output	1client	WT	unknown	AASRLRGGTSSRRLSS	rank_025	0.81	B-C	1.006	B	A,6-13	RGGTSSRR	28.509	11.716	14.362
postGMF-runs\2client\WT_analysis\more_scans\OFD1\OFD1_721-736_output	2client	WT	unknown	AASRLRGGTSSRRLSS	rank_020	0.78	C-D	0.973462	C	B,6-13	RGGTSSRR	40.366	8.343	12.007		postGMF-runs\1client\WT_analysis\more_scans\OFD1\OFD1_721-736_output	1client	WT	unknown	AASRLRGGTSSRRLSS	rank_015	0.81	B-C	0.967273	B	A,4-11	RLRGGTSS	27.97	10.884	13.873
postGMF-runs\2client\WT_analysis\more_scans\OFD1\OFD1_721-736_output	2client	WT	unknown	AASRLRGGTSSRRLSS	rank_020	0.78	C-D	0.973462	D	A,6-13	RGGTSSRR	33.741	8.63	12.559		postGMF-runs\1client\WT_analysis\more_scans\OFD1\OFD1_721-736_output	1client	WT	unknown	AASRLRGGTSSRRLSS	rank_015	0.81	B-C	0.967273	B	A,4-11	RLRGGTSS	27.97	10.884	13.873
postGMF-runs\2client\WT_analysis\more_scans\OFD1\OFD1_721-736_output	2client	WT	unknown	AASRLRGGTSSRRLSS	rank_012	0.79	C-D	0.945	D	B,4-11	RLRGGTSS	38.845	6.878	11.435		postGMF-runs\1client\WT_analysis\more_scans\OFD1\OFD1_721-736_output	1client	WT	unknown	AASRLRGGTSSRRLSS	rank_011	0.81	B-C	0.980417	B	A,5-12	LRGGTSSR	27.239	11.574	15.21
postGMF-runs\2client\WT_analysis\more_scans\OFD1\OFD1_721-736_output	2client	WT	unknown	AASRLRGGTSSRRLSS	rank_012	0.79	C-D	0.945	C	A,4-11	RLRGGTSS	37.979	6.873	11.475		postGMF-runs\1client\WT_analysis\more_scans\OFD1\OFD1_721-736_output	1client	WT	unknown	AASRLRGGTSSRRLSS	rank_011	0.81	B-C	0.980417	B	A,5-12	LRGGTSSR	27.239	11.574	15.21
postGMF-runs\2client\WT_analysis\more_scans\OFD1\OFD1_721-736_output	2client	WT	unknown	AASRLRGGTSSRRLSS	rank_021	0.78	C-D	1.00727	C	B,6-13	RGGTSSRR	37.402	7.533	11.803		postGMF-runs\1client\WT_analysis\more_scans\OFD1\OFD1_721-736_output	1client	WT	unknown	AASRLRGGTSSRRLSS	rank_012	0.81	B-C	0.976818	B	A,5-12	LRGGTSSR	26.491	11.653	14.871
postGMF-runs\2client\WT_analysis\more_scans\OFD1\OFD1_721-736_output	2client	WT	unknown	AASRLRGGTSSRRLSS	rank_016	0.78	C-D	1.00318	C	A,6-13	RGGTSSRR	36.088	7.24	11.781		postGMF-runs\1client\WT_analysis\more_scans\OFD1\OFD1_721-736_output	1client	WT	unknown	AASRLRGGTSSRRLSS	rank_013	0.82	B-C	0.968182	B	A,4-11	RLRGGTSS	26.321	11.471	14.605
postGMF-runs\2client\WT_analysis\more_scans\OFD1\OFD1_721-736_output	2client	WT	unknown	AASRLRGGTSSRRLSS	rank_015	0.78	C-D	0.992273	C	B,4-11	RLRGGTSS	35.771	7.219	11.627		postGMF-runs\1client\WT_analysis\more_scans\OFD1\OFD1_721-736_output	1client	WT	unknown	AASRLRGGTSSRRLSS	rank_004	0.82	B-C	0.97	B	A,3-10	SRLRGGTS	25.79	11.059	13.819
postGMF-runs\2client\WT_analysis\more_scans\OFD1\OFD1_721-736_output	2client	WT	unknown	AASRLRGGTSSRRLSS	rank_018	0.78	C-D	0.968636	C	A,4-11	RLRGGTSS	35.444	7.224	12.189		postGMF-runs\1client\WT_analysis\more_scans\OFD1\OFD1_721-736_output	1client	WT	unknown	AASRLRGGTSSRRLSS	rank_009	0.82	B-C	0.9735	C	A,3-10	SRLRGGTS	24.845	11.692	14.026
postGMF-runs\2client\WT_analysis\more_scans\OFD1\OFD1_721-736_output	2client	WT	unknown	AASRLRGGTSSRRLSS	rank_025	0.78	C-D	0.974615	D	A,6-13	RGGTSSRR	34.733	8.435	12.469
postGMF-runs\2client\WT_analysis\more_scans\OFD1\OFD1_721-736_output	2client	WT	unknown	AASRLRGGTSSRRLSS	rank_025	0.78	C-D	0.974615	C	B,6-13	RGGTSSRR	34.461	8.461	12.48
postGMF-runs\2client\WT_analysis\more_scans\OFD1\OFD1_721-736_output	2client	WT	unknown	AASRLRGGTSSRRLSS	rank_019	0.78	C-D	0.979545	C	B,4-11	RLRGGTSS	33.991	7.241	12.168
postGMF-runs\2client\WT_analysis\more_scans\OFD1\OFD1_721-736_output	2client	WT	unknown	AASRLRGGTSSRRLSS	rank_019	0.78	C-D	0.979545	D	A,4-11	RLRGGTSS	33.686	7.211	12.305
postGMF-runs\2client\WT_analysis\more_scans\PAC11\PAC11_137-152_output	2client	WT	unknown	AATLSNASFARLETEV	rank_001	0.89	C-D	0.978846	C	B,3-10	TLSNASFA	90.226	2.211	3.662		postGMF-runs\1client\WT_analysis\more_scans\PAC11\PAC11_137-152_output	1client	WT	unknown	AATLSNASFARLETEV	rank_001	0.84	B-C	1.01458	C	A,3-10	TLSNASFA	51.798	8.611	10.917
postGMF-runs\2client\WT_analysis\more_scans\PAC11\PAC11_137-152_output	2client	WT	unknown	AATLSNASFARLETEV	rank_001	0.89	C-D	0.978846	D	A,3-10	TLSNASFA	90.101	2.188	3.64		postGMF-runs\1client\WT_analysis\more_scans\PAC11\PAC11_137-152_output	1client	WT	unknown	AATLSNASFARLETEV	rank_001	0.84	B-C	1.01458	C	A,3-10	TLSNASFA	51.798	8.611	10.917
postGMF-runs\2client\WT_analysis\more_scans\PAC11\PAC11_137-152_output	2client	WT	unknown	AATLSNASFARLETEV	rank_002	0.87	C-D	1.00364	C	B,2-9	ATLSNASF	86.679	3.179	4.897		postGMF-runs\1client\WT_analysis\more_scans\PAC11\PAC11_137-152_output	1client	WT	unknown	AATLSNASFARLETEV	rank_002	0.83	B-C	1.025	B	A,5-12	SNASFARL	43.432	9.82	12.179
postGMF-runs\2client\WT_analysis\more_scans\PAC11\PAC11_137-152_output	2client	WT	unknown	AATLSNASFARLETEV	rank_002	0.87	C-D	1.00364	D	A,2-9	ATLSNASF	86.57	3.197	4.894		postGMF-runs\1client\WT_analysis\more_scans\PAC11\PAC11_137-152_output	1client	WT	unknown	AATLSNASFARLETEV	rank_002	0.83	B-C	1.025	B	A,5-12	SNASFARL	43.432	9.82	12.179
postGMF-runs\2client\WT_analysis\more_scans\PAC11\PAC11_137-152_output	2client	WT	unknown	AATLSNASFARLETEV	rank_006	0.84	C-D	1.00538	D	A,9-16	FARLETEV	84.253	2.185	5.074		postGMF-runs\1client\WT_analysis\more_scans\PAC11\PAC11_137-152_output	1client	WT	unknown	AATLSNASFARLETEV	rank_004	0.82	B-C	1.00538	C	A,2-9	ATLSNASF	37.264	9.402	12.607
postGMF-runs\2client\WT_analysis\more_scans\PAC11\PAC11_137-152_output	2client	WT	unknown	AATLSNASFARLETEV	rank_006	0.84	C-D	1.00538	C	B,9-16	FARLETEV	84.126	2.219	5.12		postGMF-runs\1client\WT_analysis\more_scans\PAC11\PAC11_137-152_output	1client	WT	unknown	AATLSNASFARLETEV	rank_004	0.82	B-C	1.00538	C	A,2-9	ATLSNASF	37.264	9.402	12.607
postGMF-runs\2client\WT_analysis\more_scans\PAC11\PAC11_137-152_output	2client	WT	unknown	AATLSNASFARLETEV	rank_003	0.86	C-D	1.00962	D	B,5-12	SNASFARL	81.625	3.995	7.063		postGMF-runs\1client\WT_analysis\more_scans\PAC11\PAC11_137-152_output	1client	WT	unknown	AATLSNASFARLETEV	rank_007	0.82	B-C	0.986364	C	A,4-11	LSNASFAR	36.46	11.213	14.207
postGMF-runs\2client\WT_analysis\more_scans\PAC11\PAC11_137-152_output	2client	WT	unknown	AATLSNASFARLETEV	rank_003	0.86	C-D	1.00962	C	A,5-12	SNASFARL	80.265	4.264	7.4		postGMF-runs\1client\WT_analysis\more_scans\PAC11\PAC11_137-152_output	1client	WT	unknown	AATLSNASFARLETEV	rank_007	0.82	B-C	0.986364	C	A,4-11	LSNASFAR	36.46	11.213	14.207
postGMF-runs\2client\WT_analysis\more_scans\PAC11\PAC11_137-152_output	2client	WT	unknown	AATLSNASFARLETEV	rank_004	0.86	C-D	1.02308	C	A,4-11	LSNASFAR	81.164	4.219	6.91		postGMF-runs\1client\WT_analysis\more_scans\PAC11\PAC11_137-152_output	1client	WT	unknown	AATLSNASFARLETEV	rank_006	0.82	B-C	0.9975	B	A,3-10	TLSNASFA	35.009	9.914	13.574
postGMF-runs\2client\WT_analysis\more_scans\PAC11\PAC11_137-152_output	2client	WT	unknown	AATLSNASFARLETEV	rank_004	0.86	C-D	1.02308	D	B,5-12	SNASFARL	78.843	4.359	7.706		postGMF-runs\1client\WT_analysis\more_scans\PAC11\PAC11_137-152_output	1client	WT	unknown	AATLSNASFARLETEV	rank_006	0.82	B-C	0.9975	B	A,3-10	TLSNASFA	35.009	9.914	13.574
postGMF-runs\2client\WT_analysis\more_scans\PAC11\PAC11_137-152_output	2client	WT	unknown	AATLSNASFARLETEV	rank_005	0.85	C-D	1.015	C	A,3-10	TLSNASFA	80.836	4.488	6.719		postGMF-runs\1client\WT_analysis\more_scans\PAC11\PAC11_137-152_output	1client	WT	unknown	AATLSNASFARLETEV	rank_003	0.82	B-C	1.03333	B	A,4-11	LSNASFAR	33.504	9.86	14.04
postGMF-runs\2client\WT_analysis\more_scans\PAC11\PAC11_137-152_output	2client	WT	unknown	AATLSNASFARLETEV	rank_005	0.85	C-D	1.015	D	B,3-10	TLSNASFA	80.679	4.541	6.779		postGMF-runs\1client\WT_analysis\more_scans\PAC11\PAC11_137-152_output	1client	WT	unknown	AATLSNASFARLETEV	rank_003	0.82	B-C	1.03333	B	A,4-11	LSNASFAR	33.504	9.86	14.04
postGMF-runs\2client\WT_analysis\more_scans\PAC11\PAC11_137-152_output	2client	WT	unknown	AATLSNASFARLETEV	rank_007	0.83	C-D	1.04346	D	A,9-16	FARLETEV	77.965	2.912	6.116		postGMF-runs\1client\WT_analysis\more_scans\PAC11\PAC11_137-152_output	1client	WT	unknown	AATLSNASFARLETEV	rank_010	0.82	B-C	1.00769	C	A,3-10	TLSNASFA	33.106	10.556	14.406
postGMF-runs\2client\WT_analysis\more_scans\PAC11\PAC11_137-152_output	2client	WT	unknown	AATLSNASFARLETEV	rank_007	0.83	C-D	1.04346	C	B,9-16	FARLETEV	77.833	2.943	6.155		postGMF-runs\1client\WT_analysis\more_scans\PAC11\PAC11_137-152_output	1client	WT	unknown	AATLSNASFARLETEV	rank_010	0.82	B-C	1.00769	C	A,3-10	TLSNASFA	33.106	10.556	14.406
postGMF-runs\2client\WT_analysis\more_scans\PAC11\PAC11_137-152_output	2client	WT	unknown	AATLSNASFARLETEV	rank_012	0.8	C-D	1.03409	C	A,3-10	TLSNASFA	65.809	6.4	9.658		postGMF-runs\1client\WT_analysis\more_scans\PAC11\PAC11_137-152_output	1client	WT	unknown	AATLSNASFARLETEV	rank_005	0.82	B-C	1.02375	B	A,3-10	TLSNASFA	32.61	9.413	12.916
postGMF-runs\2client\WT_analysis\more_scans\PAC11\PAC11_137-152_output	2client	WT	unknown	AATLSNASFARLETEV	rank_012	0.8	C-D	1.03409	D	B,3-10	TLSNASFA	61.81	6.823	10.165		postGMF-runs\1client\WT_analysis\more_scans\PAC11\PAC11_137-152_output	1client	WT	unknown	AATLSNASFARLETEV	rank_005	0.82	B-C	1.02375	B	A,3-10	TLSNASFA	32.61	9.413	12.916
postGMF-runs\2client\WT_analysis\more_scans\PAC11\PAC11_137-152_output	2client	WT	unknown	AATLSNASFARLETEV	rank_015	0.8	C-D	1.03091	D	B,7-14	ASFARLET	65.169	6.51	9.297		postGMF-runs\1client\WT_analysis\more_scans\PAC11\PAC11_137-152_output	1client	WT	unknown	AATLSNASFARLETEV	rank_011	0.82	B-C	1.0275	C	A,7-14	ASFARLET	32.069	12.007	15.106
postGMF-runs\2client\WT_analysis\more_scans\PAC11\PAC11_137-152_output	2client	WT	unknown	AATLSNASFARLETEV	rank_015	0.8	C-D	1.03091	C	A,7-14	ASFARLET	65.05	6.601	9.373		postGMF-runs\1client\WT_analysis\more_scans\PAC11\PAC11_137-152_output	1client	WT	unknown	AATLSNASFARLETEV	rank_011	0.82	B-C	1.0275	C	A,7-14	ASFARLET	32.069	12.007	15.106
postGMF-runs\2client\WT_analysis\more_scans\PAC11\PAC11_137-152_output	2client	WT	unknown	AATLSNASFARLETEV	rank_008	0.82	C-D	1.03538	D	B,5-12	SNASFARL	63.735	5.618	9.697		postGMF-runs\1client\WT_analysis\more_scans\PAC11\PAC11_137-152_output	1client	WT	unknown	AATLSNASFARLETEV	rank_018	0.81	B-C	1.03182	B	A,7-14	ASFARLET	30.946	10.359	13.506
postGMF-runs\2client\WT_analysis\more_scans\PAC11\PAC11_137-152_output	2client	WT	unknown	AATLSNASFARLETEV	rank_008	0.82	C-D	1.03538	C	A,5-12	SNASFARL	61.523	6.052	10.283		postGMF-runs\1client\WT_analysis\more_scans\PAC11\PAC11_137-152_output	1client	WT	unknown	AATLSNASFARLETEV	rank_018	0.81	B-C	1.03182	B	A,7-14	ASFARLET	30.946	10.359	13.506
postGMF-runs\2client\WT_analysis\more_scans\PAC11\PAC11_137-152_output	2client	WT	unknown	AATLSNASFARLETEV	rank_011	0.8	C-D	1.05038	C	A,4-11	LSNASFAR	59.862	6.715	9.905		postGMF-runs\1client\WT_analysis\more_scans\PAC11\PAC11_137-152_output	1client	WT	unknown	AATLSNASFARLETEV	rank_020	0.81	B-C	1.015	C	A,7-14	ASFARLET	30.195	12.201	15.65
postGMF-runs\2client\WT_analysis\more_scans\PAC11\PAC11_137-152_output	2client	WT	unknown	AATLSNASFARLETEV	rank_011	0.8	C-D	1.05038	D	B,4-11	LSNASFAR	58.996	6.69	9.91		postGMF-runs\1client\WT_analysis\more_scans\PAC11\PAC11_137-152_output	1client	WT	unknown	AATLSNASFARLETEV	rank_020	0.81	B-C	1.015	C	A,7-14	ASFARLET	30.195	12.201	15.65
postGMF-runs\2client\WT_analysis\more_scans\PAC11\PAC11_137-152_output	2client	WT	unknown	AATLSNASFARLETEV	rank_009	0.81	C-D	1.02192	D	A,5-12	SNASFARL	58.9	6.174	10.617		postGMF-runs\1client\WT_analysis\more_scans\PAC11\PAC11_137-152_output	1client	WT	unknown	AATLSNASFARLETEV	rank_015	0.81	B-C	1.00636	B	A,3-10	TLSNASFA	29.851	10.338	14.16
postGMF-runs\2client\WT_analysis\more_scans\PAC11\PAC11_137-152_output	2client	WT	unknown	AATLSNASFARLETEV	rank_009	0.81	C-D	1.02192	C	B,5-12	SNASFARL	54.552	6.9	11.518		postGMF-runs\1client\WT_analysis\more_scans\PAC11\PAC11_137-152_output	1client	WT	unknown	AATLSNASFARLETEV	rank_015	0.81	B-C	1.00636	B	A,3-10	TLSNASFA	29.851	10.338	14.16
postGMF-runs\2client\WT_analysis\more_scans\PAC11\PAC11_137-152_output	2client	WT	unknown	AATLSNASFARLETEV	rank_010	0.8	C-D	1.03154	D	A,4-11	LSNASFAR	56	6.282	10.071		postGMF-runs\1client\WT_analysis\more_scans\PAC11\PAC11_137-152_output	1client	WT	unknown	AATLSNASFARLETEV	rank_025	0.8	B-C	1.08364	B	A,5-12	SNASFARL	29.469	12.066	14.457
postGMF-runs\2client\WT_analysis\more_scans\PAC11\PAC11_137-152_output	2client	WT	unknown	AATLSNASFARLETEV	rank_010	0.8	C-D	1.03154	C	B,4-11	LSNASFAR	55.632	6.363	10.169		postGMF-runs\1client\WT_analysis\more_scans\PAC11\PAC11_137-152_output	1client	WT	unknown	AATLSNASFARLETEV	rank_025	0.8	B-C	1.08364	B	A,5-12	SNASFARL	29.469	12.066	14.457
postGMF-runs\2client\WT_analysis\more_scans\PAC11\PAC11_137-152_output	2client	WT	unknown	AATLSNASFARLETEV	rank_014	0.8	C-D	1.04577	D	B,4-11	LSNASFAR	53.812	6.358	10.494		postGMF-runs\1client\WT_analysis\more_scans\PAC11\PAC11_137-152_output	1client	WT	unknown	AATLSNASFARLETEV	rank_017	0.81	B-C	0.980455	C	A,7-14	ASFARLET	28.96	11.767	14.857
postGMF-runs\2client\WT_analysis\more_scans\PAC11\PAC11_137-152_output	2client	WT	unknown	AATLSNASFARLETEV	rank_014	0.8	C-D	1.04577	C	A,4-11	LSNASFAR	53.63	6.309	10.515		postGMF-runs\1client\WT_analysis\more_scans\PAC11\PAC11_137-152_output	1client	WT	unknown	AATLSNASFARLETEV	rank_017	0.81	B-C	0.980455	C	A,7-14	ASFARLET	28.96	11.767	14.857
postGMF-runs\2client\WT_analysis\more_scans\PAC11\PAC11_137-152_output	2client	WT	unknown	AATLSNASFARLETEV	rank_013	0.8	C-D	1.07136	D	A,5-12	SNASFARL	53.358	6.518	10.618		postGMF-runs\1client\WT_analysis\more_scans\PAC11\PAC11_137-152_output	1client	WT	unknown	AATLSNASFARLETEV	rank_022	0.81	B-C	1.01136	C	A,4-11	LSNASFAR	28.383	11.452	15.997
postGMF-runs\2client\WT_analysis\more_scans\PAC11\PAC11_137-152_output	2client	WT	unknown	AATLSNASFARLETEV	rank_013	0.8	C-D	1.07136	C	B,6-13	NASFARLE	52.016	6.453	11.342		postGMF-runs\1client\WT_analysis\more_scans\PAC11\PAC11_137-152_output	1client	WT	unknown	AATLSNASFARLETEV	rank_022	0.81	B-C	1.01136	C	A,4-11	LSNASFAR	28.383	11.452	15.997
postGMF-runs\2client\WT_analysis\more_scans\PAC11\PAC11_137-152_output	2client	WT	unknown	AATLSNASFARLETEV	rank_016	0.79	C-D	1.02	C	B,9-16	FARLETEV	44.094	5.687	11.139		postGMF-runs\1client\WT_analysis\more_scans\PAC11\PAC11_137-152_output	1client	WT	unknown	AATLSNASFARLETEV	rank_013	0.82	B-C	0.97875	C	A,3-10	TLSNASFA	28.302	11.315	14.678
postGMF-runs\2client\WT_analysis\more_scans\PAC11\PAC11_137-152_output	2client	WT	unknown	AATLSNASFARLETEV	rank_016	0.79	C-D	1.02	D	A,9-16	FARLETEV	42.463	6.082	11.317		postGMF-runs\1client\WT_analysis\more_scans\PAC11\PAC11_137-152_output	1client	WT	unknown	AATLSNASFARLETEV	rank_013	0.82	B-C	0.97875	C	A,3-10	TLSNASFA	28.302	11.315	14.678
postGMF-runs\2client\WT_analysis\more_scans\PAC11\PAC11_137-152_output	2client	WT	unknown	AATLSNASFARLETEV	rank_022	0.78	C-D	1.01125	D	B,4-11	LSNASFAR	41.671	8.354	12.681		postGMF-runs\1client\WT_analysis\more_scans\PAC11\PAC11_137-152_output	1client	WT	unknown	AATLSNASFARLETEV	rank_014	0.81	B-C	0.986818	B	A,7-14	ASFARLET	27.918	11.781	15.196
postGMF-runs\2client\WT_analysis\more_scans\PAC11\PAC11_137-152_output	2client	WT	unknown	AATLSNASFARLETEV	rank_022	0.78	C-D	1.01125	C	A,4-11	LSNASFAR	41.326	8.422	12.773		postGMF-runs\1client\WT_analysis\more_scans\PAC11\PAC11_137-152_output	1client	WT	unknown	AATLSNASFARLETEV	rank_014	0.81	B-C	0.986818	B	A,7-14	ASFARLET	27.918	11.781	15.196
postGMF-runs\2client\WT_analysis\more_scans\PAC11\PAC11_137-152_output	2client	WT	unknown	AATLSNASFARLETEV	rank_019	0.78	C-D	0.979545	D	B,8-15	SFARLETE	41.629	7.466	12.027		postGMF-runs\1client\WT_analysis\more_scans\PAC11\PAC11_137-152_output	1client	WT	unknown	AATLSNASFARLETEV	rank_021	0.81	B-C	1.03182	C	A,3-10	TLSNASFA	27.796	10.562	13.676
postGMF-runs\2client\WT_analysis\more_scans\PAC11\PAC11_137-152_output	2client	WT	unknown	AATLSNASFARLETEV	rank_019	0.78	C-D	0.979545	C	A,8-15	SFARLETE	40.009	7.766	12.342		postGMF-runs\1client\WT_analysis\more_scans\PAC11\PAC11_137-152_output	1client	WT	unknown	AATLSNASFARLETEV	rank_021	0.81	B-C	1.03182	C	A,3-10	TLSNASFA	27.796	10.562	13.676
postGMF-runs\2client\WT_analysis\more_scans\PAC11\PAC11_137-152_output	2client	WT	unknown	AATLSNASFARLETEV	rank_024	0.78	C-D	1.01115	C	A,4-11	LSNASFAR	39.534	8.992	12.226		postGMF-runs\1client\WT_analysis\more_scans\PAC11\PAC11_137-152_output	1client	WT	unknown	AATLSNASFARLETEV	rank_016	0.81	B-C	1.01227	B	A,4-11	LSNASFAR	27.156	11.171	15.698
postGMF-runs\2client\WT_analysis\more_scans\PAC11\PAC11_137-152_output	2client	WT	unknown	AATLSNASFARLETEV	rank_024	0.78	C-D	1.01115	D	B,4-11	LSNASFAR	39.344	8.942	12.184		postGMF-runs\1client\WT_analysis\more_scans\PAC11\PAC11_137-152_output	1client	WT	unknown	AATLSNASFARLETEV	rank_016	0.81	B-C	1.01227	B	A,4-11	LSNASFAR	27.156	11.171	15.698
postGMF-runs\2client\WT_analysis\more_scans\PAC11\PAC11_137-152_output	2client	WT	unknown	AATLSNASFARLETEV	rank_025	0.77	C-D	1.06636	D	B,5-12	SNASFARL	39.261	8.213	12.968		postGMF-runs\1client\WT_analysis\more_scans\PAC11\PAC11_137-152_output	1client	WT	unknown	AATLSNASFARLETEV	rank_024	0.81	B-C	1.01773	B	A,5-12	SNASFARL	26.787	12.082	16.336
postGMF-runs\2client\WT_analysis\more_scans\PAC11\PAC11_137-152_output	2client	WT	unknown	AATLSNASFARLETEV	rank_025	0.77	C-D	1.06636	C	A,5-12	SNASFARL	38.438	8.176	12.994		postGMF-runs\1client\WT_analysis\more_scans\PAC11\PAC11_137-152_output	1client	WT	unknown	AATLSNASFARLETEV	rank_024	0.81	B-C	1.01773	B	A,5-12	SNASFARL	26.787	12.082	16.336
postGMF-runs\2client\WT_analysis\more_scans\PAC11\PAC11_137-152_output	2client	WT	unknown	AATLSNASFARLETEV	rank_023	0.78	C-D	0.981818	D	A,3-10	TLSNASFA	34.693	8.384	13.248		postGMF-runs\1client\WT_analysis\more_scans\PAC11\PAC11_137-152_output	1client	WT	unknown	AATLSNASFARLETEV	rank_009	0.82	B-C	0.977083	B	A,3-10	TLSNASFA	26.666	11.289	14.925
postGMF-runs\2client\WT_analysis\more_scans\PAC11\PAC11_137-152_output	2client	WT	unknown	AATLSNASFARLETEV	rank_023	0.78	C-D	0.981818	C	B,4-11	LSNASFAR	32.297	8.543	13.935		postGMF-runs\1client\WT_analysis\more_scans\PAC11\PAC11_137-152_output	1client	WT	unknown	AATLSNASFARLETEV	rank_009	0.82	B-C	0.977083	B	A,3-10	TLSNASFA	26.666	11.289	14.925
postGMF-runs\2client\WT_analysis\more_scans\PAC11\PAC11_137-152_output	2client	WT	unknown	AATLSNASFARLETEV	rank_020	0.78	C-D	0.97	D	B,3-10	TLSNASFA	33.781	7.546	13.562		postGMF-runs\1client\WT_analysis\more_scans\PAC11\PAC11_137-152_output	1client	WT	unknown	AATLSNASFARLETEV	rank_012	0.82	B-C	0.98125	C	A,4-11	LSNASFAR	25.885	11.949	15.96
postGMF-runs\2client\WT_analysis\more_scans\PAC11\PAC11_137-152_output	2client	WT	unknown	AATLSNASFARLETEV	rank_020	0.78	C-D	0.97	C	A,3-10	TLSNASFA	33.606	7.497	13.72		postGMF-runs\1client\WT_analysis\more_scans\PAC11\PAC11_137-152_output	1client	WT	unknown	AATLSNASFARLETEV	rank_012	0.82	B-C	0.98125	C	A,4-11	LSNASFAR	25.885	11.949	15.96
postGMF-runs\2client\WT_analysis\more_scans\PAC11\PAC11_137-152_output	2client	WT	unknown	AATLSNASFARLETEV	rank_018	0.78	C-D	0.961818	C	A,3-10	TLSNASFA	33.365	7.79	13.725		postGMF-runs\1client\WT_analysis\more_scans\PAC11\PAC11_137-152_output	1client	WT	unknown	AATLSNASFARLETEV	rank_008	0.82	B-C	0.989167	B	A,4-11	LSNASFAR	25.863	11.593	15.879
postGMF-runs\2client\WT_analysis\more_scans\PAC11\PAC11_137-152_output	2client	WT	unknown	AATLSNASFARLETEV	rank_018	0.78	C-D	0.961818	D	B,3-10	TLSNASFA	33.316	7.734	13.63		postGMF-runs\1client\WT_analysis\more_scans\PAC11\PAC11_137-152_output	1client	WT	unknown	AATLSNASFARLETEV	rank_008	0.82	B-C	0.989167	B	A,4-11	LSNASFAR	25.863	11.593	15.879
postGMF-runs\2client\WT_analysis\more_scans\PAC11\PAC11_137-152_output	2client	WT	unknown	AATLSNASFARLETEV	rank_021	0.78	C-D	0.977273	D	A,7-14	ASFARLET	32.988	8.175	13.687		postGMF-runs\1client\WT_analysis\more_scans\PAC11\PAC11_137-152_output	1client	WT	unknown	AATLSNASFARLETEV	rank_019	0.81	B-C	0.999167	C	A,7-14	ASFARLET	25.472	12.586	16.398
postGMF-runs\2client\WT_analysis\more_scans\PAC11\PAC11_137-152_output	2client	WT	unknown	AATLSNASFARLETEV	rank_021	0.78	C-D	0.977273	C	B,7-14	ASFARLET	32.412	8.168	13.658		postGMF-runs\1client\WT_analysis\more_scans\PAC11\PAC11_137-152_output	1client	WT	unknown	AATLSNASFARLETEV	rank_019	0.81	B-C	0.999167	C	A,7-14	ASFARLET	25.472	12.586	16.398
postGMF-runs\2client\WT_analysis\more_scans\PAC11\PAC11_137-152_output	2client	WT	unknown	AATLSNASFARLETEV	rank_017	0.78	C-D	0.970833	D	B,2-9	ATLSNASF	31.839	7.741	13.329		postGMF-runs\1client\WT_analysis\more_scans\PAC11\PAC11_137-152_output	1client	WT	unknown	AATLSNASFARLETEV	rank_023	0.81	B-C	1.02409	B	A,3-10	TLSNASFA	25.221	12.034	16.11
postGMF-runs\2client\WT_analysis\more_scans\PAC11\PAC11_137-152_output	2client	WT	unknown	AATLSNASFARLETEV	rank_017	0.78	C-D	0.970833	C	A,2-9	ATLSNASF	31.239	8.005	13.459		postGMF-runs\1client\WT_analysis\more_scans\PAC11\PAC11_137-152_output	1client	WT	unknown	AATLSNASFARLETEV	rank_023	0.81	B-C	1.02409	B	A,3-10	TLSNASFA	25.221	12.034	16.11
postGMF-runs\2client\WT_analysis\more_scans\OFD1\OFD1_857-872_output	2client	WT	unknown	AAVPLSYQHPSVDQKQ	rank_003	0.78	C-D	1.15318	D	A,1-8	AAVPLSYQ	50.742	6.431	9.587		postGMF-runs\1client\WT_analysis\more_scans\OFD1\OFD1_857-872_output	1client	WT	unknown	AAVPLSYQHPSVDQKQ	rank_003	0.82	B-C	1.04	B	A,3-10	VPLSYQHP	40.27	9.421	12.635
postGMF-runs\2client\WT_analysis\more_scans\OFD1\OFD1_857-872_output	2client	WT	unknown	AAVPLSYQHPSVDQKQ	rank_003	0.78	C-D	1.15318	C	B,1-8	AAVPLSYQ	50.723	6.531	9.571		postGMF-runs\1client\WT_analysis\more_scans\OFD1\OFD1_857-872_output	1client	WT	unknown	AAVPLSYQHPSVDQKQ	rank_003	0.82	B-C	1.04	B	A,3-10	VPLSYQHP	40.27	9.421	12.635
postGMF-runs\2client\WT_analysis\more_scans\OFD1\OFD1_857-872_output	2client	WT	unknown	AAVPLSYQHPSVDQKQ	rank_008	0.78	C-D	0.986818	C	B,2-9	AVPLSYQH	48.305	7.524	11.452		postGMF-runs\1client\WT_analysis\more_scans\OFD1\OFD1_857-872_output	1client	WT	unknown	AAVPLSYQHPSVDQKQ	rank_004	0.82	B-C	1.01615	C	A,2-9	AVPLSYQH	36.644	9.024	13.024
postGMF-runs\2client\WT_analysis\more_scans\OFD1\OFD1_857-872_output	2client	WT	unknown	AAVPLSYQHPSVDQKQ	rank_008	0.78	C-D	0.986818	D	A,2-9	AVPLSYQH	38.895	7.693	12.364		postGMF-runs\1client\WT_analysis\more_scans\OFD1\OFD1_857-872_output	1client	WT	unknown	AAVPLSYQHPSVDQKQ	rank_004	0.82	B-C	1.01615	C	A,2-9	AVPLSYQH	36.644	9.024	13.024
postGMF-runs\2client\WT_analysis\more_scans\OFD1\OFD1_857-872_output	2client	WT	unknown	AAVPLSYQHPSVDQKQ	rank_002	0.78	C-D	1.11545	D	B,2-9	AVPLSYQH	47.251	6.023	10.098		postGMF-runs\1client\WT_analysis\more_scans\OFD1\OFD1_857-872_output	1client	WT	unknown	AAVPLSYQHPSVDQKQ	rank_001	0.82	B-C	1.00731	B	A,5-12	LSYQHPSV	32.597	9.442	13.943
postGMF-runs\2client\WT_analysis\more_scans\OFD1\OFD1_857-872_output	2client	WT	unknown	AAVPLSYQHPSVDQKQ	rank_002	0.78	C-D	1.11545	C	A,2-9	AVPLSYQH	44.501	6.786	10.985		postGMF-runs\1client\WT_analysis\more_scans\OFD1\OFD1_857-872_output	1client	WT	unknown	AAVPLSYQHPSVDQKQ	rank_001	0.82	B-C	1.00731	B	A,5-12	LSYQHPSV	32.597	9.442	13.943
postGMF-runs\2client\WT_analysis\more_scans\OFD1\OFD1_857-872_output	2client	WT	unknown	AAVPLSYQHPSVDQKQ	rank_014	0.77	C-D	1.10364	D	B,2-9	AVPLSYQH	46.569	7.622	10.989		postGMF-runs\1client\WT_analysis\more_scans\OFD1\OFD1_857-872_output	1client	WT	unknown	AAVPLSYQHPSVDQKQ	rank_002	0.82	B-C	0.985	C	A,3-10	VPLSYQHP	30.97	9.905	13.264
postGMF-runs\2client\WT_analysis\more_scans\OFD1\OFD1_857-872_output	2client	WT	unknown	AAVPLSYQHPSVDQKQ	rank_014	0.77	C-D	1.10364	C	A,2-9	AVPLSYQH	44.321	7.861	11.412		postGMF-runs\1client\WT_analysis\more_scans\OFD1\OFD1_857-872_output	1client	WT	unknown	AAVPLSYQHPSVDQKQ	rank_002	0.82	B-C	0.985	C	A,3-10	VPLSYQHP	30.97	9.905	13.264
postGMF-runs\2client\WT_analysis\more_scans\OFD1\OFD1_857-872_output	2client	WT	unknown	AAVPLSYQHPSVDQKQ	rank_004	0.78	C-D	0.990769	D	A,2-9	AVPLSYQH	45.084	7.715	12.174		postGMF-runs\1client\WT_analysis\more_scans\OFD1\OFD1_857-872_output	1client	WT	unknown	AAVPLSYQHPSVDQKQ	rank_016	0.81	B-C	1.02423	C	A,2-9	AVPLSYQH	29.97	11.232	14.463
postGMF-runs\2client\WT_analysis\more_scans\OFD1\OFD1_857-872_output	2client	WT	unknown	AAVPLSYQHPSVDQKQ	rank_004	0.78	C-D	0.990769	C	B,2-9	AVPLSYQH	45.068	7.609	12.138		postGMF-runs\1client\WT_analysis\more_scans\OFD1\OFD1_857-872_output	1client	WT	unknown	AAVPLSYQHPSVDQKQ	rank_016	0.81	B-C	1.02423	C	A,2-9	AVPLSYQH	29.97	11.232	14.463
postGMF-runs\2client\WT_analysis\more_scans\OFD1\OFD1_857-872_output	2client	WT	unknown	AAVPLSYQHPSVDQKQ	rank_007	0.78	C-D	0.961154	D	A,2-9	AVPLSYQH	44.199	7.79	11.857		postGMF-runs\1client\WT_analysis\more_scans\OFD1\OFD1_857-872_output	1client	WT	unknown	AAVPLSYQHPSVDQKQ	rank_024	0.8	B-C	1.065	B	A,2-9	AVPLSYQH	28.199	11.1	14.281
postGMF-runs\2client\WT_analysis\more_scans\OFD1\OFD1_857-872_output	2client	WT	unknown	AAVPLSYQHPSVDQKQ	rank_007	0.78	C-D	0.961154	C	B,2-9	AVPLSYQH	35.89	8.206	12.723		postGMF-runs\1client\WT_analysis\more_scans\OFD1\OFD1_857-872_output	1client	WT	unknown	AAVPLSYQHPSVDQKQ	rank_024	0.8	B-C	1.065	B	A,2-9	AVPLSYQH	28.199	11.1	14.281
postGMF-runs\2client\WT_analysis\more_scans\OFD1\OFD1_857-872_output	2client	WT	unknown	AAVPLSYQHPSVDQKQ	rank_006	0.78	C-D	0.981364	D	A,2-9	AVPLSYQH	42.652	7.271	11.999		postGMF-runs\1client\WT_analysis\more_scans\OFD1\OFD1_857-872_output	1client	WT	unknown	AAVPLSYQHPSVDQKQ	rank_014	0.81	B-C	1.01038	B	A,4-11	PLSYQHPS	27.814	11.636	15.09
postGMF-runs\2client\WT_analysis\more_scans\OFD1\OFD1_857-872_output	2client	WT	unknown	AAVPLSYQHPSVDQKQ	rank_006	0.78	C-D	0.981364	C	B,2-9	AVPLSYQH	42.391	7.207	11.965		postGMF-runs\1client\WT_analysis\more_scans\OFD1\OFD1_857-872_output	1client	WT	unknown	AAVPLSYQHPSVDQKQ	rank_014	0.81	B-C	1.01038	B	A,4-11	PLSYQHPS	27.814	11.636	15.09
postGMF-runs\2client\WT_analysis\more_scans\OFD1\OFD1_857-872_output	2client	WT	unknown	AAVPLSYQHPSVDQKQ	rank_021	0.77	C-D	1.00885	C	B,1-8	AAVPLSYQ	42.315	8.251	12.66		postGMF-runs\1client\WT_analysis\more_scans\OFD1\OFD1_857-872_output	1client	WT	unknown	AAVPLSYQHPSVDQKQ	rank_006	0.82	B-C	0.976667	B	A,2-9	AVPLSYQH	27.498	10.474	14.315
postGMF-runs\2client\WT_analysis\more_scans\OFD1\OFD1_857-872_output	2client	WT	unknown	AAVPLSYQHPSVDQKQ	rank_021	0.77	C-D	1.00885	D	A,1-8	AAVPLSYQ	40.809	8.258	12.754		postGMF-runs\1client\WT_analysis\more_scans\OFD1\OFD1_857-872_output	1client	WT	unknown	AAVPLSYQHPSVDQKQ	rank_006	0.82	B-C	0.976667	B	A,2-9	AVPLSYQH	27.498	10.474	14.315
postGMF-runs\2client\WT_analysis\more_scans\OFD1\OFD1_857-872_output	2client	WT	unknown	AAVPLSYQHPSVDQKQ	rank_012	0.78	C-D	0.981364	D	B,2-9	AVPLSYQH	42.055	7.392	12.055		postGMF-runs\1client\WT_analysis\more_scans\OFD1\OFD1_857-872_output	1client	WT	unknown	AAVPLSYQHPSVDQKQ	rank_017	0.81	B-C	1.01708	C	A,2-9	AVPLSYQH	27.171	13.862	16.989
postGMF-runs\2client\WT_analysis\more_scans\OFD1\OFD1_857-872_output	2client	WT	unknown	AAVPLSYQHPSVDQKQ	rank_012	0.78	C-D	0.981364	C	A,2-9	AVPLSYQH	41.263	7.431	12.148		postGMF-runs\1client\WT_analysis\more_scans\OFD1\OFD1_857-872_output	1client	WT	unknown	AAVPLSYQHPSVDQKQ	rank_017	0.81	B-C	1.01708	C	A,2-9	AVPLSYQH	27.171	13.862	16.989
postGMF-runs\2client\WT_analysis\more_scans\OFD1\OFD1_857-872_output	2client	WT	unknown	AAVPLSYQHPSVDQKQ	rank_024	0.76	C-D	1.19409	D	A,2-9	AVPLSYQH	41.101	7.832	11.932		postGMF-runs\1client\WT_analysis\more_scans\OFD1\OFD1_857-872_output	1client	WT	unknown	AAVPLSYQHPSVDQKQ	rank_005	0.82	B-C	0.990909	C	A,3-10	VPLSYQHP	27.025	11.334	14.023
postGMF-runs\2client\WT_analysis\more_scans\OFD1\OFD1_857-872_output	2client	WT	unknown	AAVPLSYQHPSVDQKQ	rank_024	0.76	C-D	1.19409	C	B,1-8	AAVPLSYQ	41.1	7.777	11.393		postGMF-runs\1client\WT_analysis\more_scans\OFD1\OFD1_857-872_output	1client	WT	unknown	AAVPLSYQHPSVDQKQ	rank_005	0.82	B-C	0.990909	C	A,3-10	VPLSYQHP	27.025	11.334	14.023
postGMF-runs\2client\WT_analysis\more_scans\OFD1\OFD1_857-872_output	2client	WT	unknown	AAVPLSYQHPSVDQKQ	rank_005	0.78	C-D	0.991154	C	A,2-9	AVPLSYQH	40.312	7.623	12.033		postGMF-runs\1client\WT_analysis\more_scans\OFD1\OFD1_857-872_output	1client	WT	unknown	AAVPLSYQHPSVDQKQ	rank_012	0.81	B-C	1.01091	C	A,3-10	VPLSYQHP	26.454	12.101	15.186
postGMF-runs\2client\WT_analysis\more_scans\OFD1\OFD1_857-872_output	2client	WT	unknown	AAVPLSYQHPSVDQKQ	rank_005	0.78	C-D	0.991154	D	B,2-9	AVPLSYQH	37.383	8.057	12.577		postGMF-runs\1client\WT_analysis\more_scans\OFD1\OFD1_857-872_output	1client	WT	unknown	AAVPLSYQHPSVDQKQ	rank_012	0.81	B-C	1.01091	C	A,3-10	VPLSYQHP	26.454	12.101	15.186
postGMF-runs\2client\WT_analysis\more_scans\OFD1\OFD1_857-872_output	2client	WT	unknown	AAVPLSYQHPSVDQKQ	rank_017	0.77	C-D	0.983182	D	A,2-9	AVPLSYQH	39.626	7.759	12.359		postGMF-runs\1client\WT_analysis\more_scans\OFD1\OFD1_857-872_output	1client	WT	unknown	AAVPLSYQHPSVDQKQ	rank_010	0.81	B-C	0.98125	B	A,2-9	AVPLSYQH	26.368	10.887	14.491
postGMF-runs\2client\WT_analysis\more_scans\OFD1\OFD1_857-872_output	2client	WT	unknown	AAVPLSYQHPSVDQKQ	rank_017	0.77	C-D	0.983182	C	B,2-9	AVPLSYQH	39.311	7.701	12.47		postGMF-runs\1client\WT_analysis\more_scans\OFD1\OFD1_857-872_output	1client	WT	unknown	AAVPLSYQHPSVDQKQ	rank_010	0.81	B-C	0.98125	B	A,2-9	AVPLSYQH	26.368	10.887	14.491
postGMF-runs\2client\WT_analysis\more_scans\OFD1\OFD1_857-872_output	2client	WT	unknown	AAVPLSYQHPSVDQKQ	rank_001	0.79	C-D	0.990455	D	B,3-10	VPLSYQHP	37.055	7.036	11.938		postGMF-runs\1client\WT_analysis\more_scans\OFD1\OFD1_857-872_output	1client	WT	unknown	AAVPLSYQHPSVDQKQ	rank_015	0.81	B-C	1.00909	C	A,3-10	VPLSYQHP	26.316	11.696	15.329
postGMF-runs\2client\WT_analysis\more_scans\OFD1\OFD1_857-872_output	2client	WT	unknown	AAVPLSYQHPSVDQKQ	rank_001	0.79	C-D	0.990455	C	A,4-11	PLSYQHPS	36.89	7.018	11.963		postGMF-runs\1client\WT_analysis\more_scans\OFD1\OFD1_857-872_output	1client	WT	unknown	AAVPLSYQHPSVDQKQ	rank_015	0.81	B-C	1.00909	C	A,3-10	VPLSYQHP	26.316	11.696	15.329
postGMF-runs\2client\WT_analysis\more_scans\OFD1\OFD1_857-872_output	2client	WT	unknown	AAVPLSYQHPSVDQKQ	rank_010	0.78	C-D	0.98	D	B,2-9	AVPLSYQH	36.458	8.003	12.596		postGMF-runs\1client\WT_analysis\more_scans\OFD1\OFD1_857-872_output	1client	WT	unknown	AAVPLSYQHPSVDQKQ	rank_009	0.81	B-C	0.998077	C	A,3-10	VPLSYQHP	26.23	12.343	15.514
postGMF-runs\2client\WT_analysis\more_scans\OFD1\OFD1_857-872_output	2client	WT	unknown	AAVPLSYQHPSVDQKQ	rank_010	0.78	C-D	0.98	C	A,2-9	AVPLSYQH	36.4	8.102	12.624		postGMF-runs\1client\WT_analysis\more_scans\OFD1\OFD1_857-872_output	1client	WT	unknown	AAVPLSYQHPSVDQKQ	rank_009	0.81	B-C	0.998077	C	A,3-10	VPLSYQHP	26.23	12.343	15.514
postGMF-runs\2client\WT_analysis\more_scans\OFD1\OFD1_857-872_output	2client	WT	unknown	AAVPLSYQHPSVDQKQ	rank_019	0.77	C-D	0.984231	D	B,2-9	AVPLSYQH	36.179	8.286	13.061		postGMF-runs\1client\WT_analysis\more_scans\OFD1\OFD1_857-872_output	1client	WT	unknown	AAVPLSYQHPSVDQKQ	rank_011	0.81	B-C	0.980909	B	A,3-10	VPLSYQHP	26.036	11.464	14.386
postGMF-runs\2client\WT_analysis\more_scans\OFD1\OFD1_857-872_output	2client	WT	unknown	AAVPLSYQHPSVDQKQ	rank_019	0.77	C-D	0.984231	C	A,2-9	AVPLSYQH	32.936	8.179	13.113		postGMF-runs\1client\WT_analysis\more_scans\OFD1\OFD1_857-872_output	1client	WT	unknown	AAVPLSYQHPSVDQKQ	rank_011	0.81	B-C	0.980909	B	A,3-10	VPLSYQHP	26.036	11.464	14.386
postGMF-runs\2client\WT_analysis\more_scans\OFD1\OFD1_857-872_output	2client	WT	unknown	AAVPLSYQHPSVDQKQ	rank_011	0.78	C-D	0.971364	D	B,2-9	AVPLSYQH	35.089	7.741	12.593		postGMF-runs\1client\WT_analysis\more_scans\OFD1\OFD1_857-872_output	1client	WT	unknown	AAVPLSYQHPSVDQKQ	rank_020	0.8	B-C	1.06136	B	A,2-9	AVPLSYQH	25.752	11.192	14.239
postGMF-runs\2client\WT_analysis\more_scans\OFD1\OFD1_857-872_output	2client	WT	unknown	AAVPLSYQHPSVDQKQ	rank_011	0.78	C-D	0.971364	C	A,2-9	AVPLSYQH	33.895	7.878	12.81		postGMF-runs\1client\WT_analysis\more_scans\OFD1\OFD1_857-872_output	1client	WT	unknown	AAVPLSYQHPSVDQKQ	rank_020	0.8	B-C	1.06136	B	A,2-9	AVPLSYQH	25.752	11.192	14.239
postGMF-runs\2client\WT_analysis\more_scans\OFD1\OFD1_857-872_output	2client	WT	unknown	AAVPLSYQHPSVDQKQ	rank_018	0.77	C-D	0.990455	C	A,1-8	AAVPLSYQ	35.009	7.955	12.735		postGMF-runs\1client\WT_analysis\more_scans\OFD1\OFD1_857-872_output	1client	WT	unknown	AAVPLSYQHPSVDQKQ	rank_021	0.8	B-C	1.06773	C	A,4-11	PLSYQHPS	25.711	10.845	13.99
postGMF-runs\2client\WT_analysis\more_scans\OFD1\OFD1_857-872_output	2client	WT	unknown	AAVPLSYQHPSVDQKQ	rank_018	0.77	C-D	0.990455	D	B,1-8	AAVPLSYQ	33.046	8.29	12.925		postGMF-runs\1client\WT_analysis\more_scans\OFD1\OFD1_857-872_output	1client	WT	unknown	AAVPLSYQHPSVDQKQ	rank_021	0.8	B-C	1.06773	C	A,4-11	PLSYQHPS	25.711	10.845	13.99
postGMF-runs\2client\WT_analysis\more_scans\OFD1\OFD1_857-872_output	2client	WT	unknown	AAVPLSYQHPSVDQKQ	rank_020	0.77	C-D	0.971923	D	B,2-9	AVPLSYQH	34.744	8.445	13.045		postGMF-runs\1client\WT_analysis\more_scans\OFD1\OFD1_857-872_output	1client	WT	unknown	AAVPLSYQHPSVDQKQ	rank_022	0.8	B-C	1.03273	C	A,5-12	LSYQHPSV	25.614	12.607	17.048
postGMF-runs\2client\WT_analysis\more_scans\OFD1\OFD1_857-872_output	2client	WT	unknown	AAVPLSYQHPSVDQKQ	rank_020	0.77	C-D	0.971923	C	A,2-9	AVPLSYQH	34.626	8.432	13.077		postGMF-runs\1client\WT_analysis\more_scans\OFD1\OFD1_857-872_output	1client	WT	unknown	AAVPLSYQHPSVDQKQ	rank_022	0.8	B-C	1.03273	C	A,5-12	LSYQHPSV	25.614	12.607	17.048
postGMF-runs\2client\WT_analysis\more_scans\OFD1\OFD1_857-872_output	2client	WT	unknown	AAVPLSYQHPSVDQKQ	rank_009	0.78	C-D	0.975	C	A,2-9	AVPLSYQH	34.094	8.027	13.044		postGMF-runs\1client\WT_analysis\more_scans\OFD1\OFD1_857-872_output	1client	WT	unknown	AAVPLSYQHPSVDQKQ	rank_018	0.81	B-C	1.01727	C	A,6-13	SYQHPSVD	24.965	13.312	17.17
postGMF-runs\2client\WT_analysis\more_scans\OFD1\OFD1_857-872_output	2client	WT	unknown	AAVPLSYQHPSVDQKQ	rank_009	0.78	C-D	0.975	D	B,2-9	AVPLSYQH	34.004	8.016	13.091		postGMF-runs\1client\WT_analysis\more_scans\OFD1\OFD1_857-872_output	1client	WT	unknown	AAVPLSYQHPSVDQKQ	rank_018	0.81	B-C	1.01727	C	A,6-13	SYQHPSVD	24.965	13.312	17.17
postGMF-runs\2client\WT_analysis\more_scans\OFD1\OFD1_857-872_output	2client	WT	unknown	AAVPLSYQHPSVDQKQ	rank_015	0.78	C-D	0.961364	D	A,2-9	AVPLSYQH	33.739	7.821	12.871		postGMF-runs\1client\WT_analysis\more_scans\OFD1\OFD1_857-872_output	1client	WT	unknown	AAVPLSYQHPSVDQKQ	rank_018	0.81	B-C	1.01727	B	A,1-8	AAVPLSYQ	22.771	13.834	17.068
postGMF-runs\2client\WT_analysis\more_scans\OFD1\OFD1_857-872_output	2client	WT	unknown	AAVPLSYQHPSVDQKQ	rank_015	0.78	C-D	0.961364	C	B,2-9	AVPLSYQH	33.371	7.903	12.897		postGMF-runs\1client\WT_analysis\more_scans\OFD1\OFD1_857-872_output	1client	WT	unknown	AAVPLSYQHPSVDQKQ	rank_018	0.81	B-C	1.01727	B	A,1-8	AAVPLSYQ	22.771	13.834	17.068
postGMF-runs\2client\WT_analysis\more_scans\OFD1\OFD1_857-872_output	2client	WT	unknown	AAVPLSYQHPSVDQKQ	rank_022	0.77	C-D	0.988462	C	A,2-9	AVPLSYQH	33.27	8.646	13.266		postGMF-runs\1client\WT_analysis\more_scans\OFD1\OFD1_857-872_output	1client	WT	unknown	AAVPLSYQHPSVDQKQ	rank_023	0.8	B-C	1.02955	C	A,4-11	PLSYQHPS	24.677	13.002	17.237
postGMF-runs\2client\WT_analysis\more_scans\OFD1\OFD1_857-872_output	2client	WT	unknown	AAVPLSYQHPSVDQKQ	rank_022	0.77	C-D	0.988462	D	B,2-9	AVPLSYQH	32.172	8.585	13.282		postGMF-runs\1client\WT_analysis\more_scans\OFD1\OFD1_857-872_output	1client	WT	unknown	AAVPLSYQHPSVDQKQ	rank_023	0.8	B-C	1.02955	C	A,4-11	PLSYQHPS	24.677	13.002	17.237
postGMF-runs\2client\WT_analysis\more_scans\OFD1\OFD1_857-872_output	2client	WT	unknown	AAVPLSYQHPSVDQKQ	rank_023	0.77	C-D	0.990385	C	B,2-9	AVPLSYQH	31.941	8.934	13.286		postGMF-runs\1client\WT_analysis\more_scans\OFD1\OFD1_857-872_output	1client	WT	unknown	AAVPLSYQHPSVDQKQ	rank_025	0.8	B-C	1.10727	B	A,3-10	VPLSYQHP	23.981	11.724	14.945
postGMF-runs\2client\WT_analysis\more_scans\OFD1\OFD1_857-872_output	2client	WT	unknown	AAVPLSYQHPSVDQKQ	rank_023	0.77	C-D	0.990385	D	A,2-9	AVPLSYQH	31.844	9.132	13.457		postGMF-runs\1client\WT_analysis\more_scans\OFD1\OFD1_857-872_output	1client	WT	unknown	AAVPLSYQHPSVDQKQ	rank_025	0.8	B-C	1.10727	B	A,3-10	VPLSYQHP	23.981	11.724	14.945
postGMF-runs\2client\WT_analysis\more_scans\OFD1\OFD1_857-872_output	2client	WT	unknown	AAVPLSYQHPSVDQKQ	rank_013	0.78	C-D	0.968636	C	A,4-11	PLSYQHPS	31.47	8.767	13.48		postGMF-runs\1client\WT_analysis\more_scans\OFD1\OFD1_857-872_output	1client	WT	unknown	AAVPLSYQHPSVDQKQ	rank_019	0.8	B-C	1.06955	B	A,4-11	PLSYQHPS	23.766	12.042	16.514
postGMF-runs\2client\WT_analysis\more_scans\OFD1\OFD1_857-872_output	2client	WT	unknown	AAVPLSYQHPSVDQKQ	rank_013	0.78	C-D	0.968636	D	B,2-9	AVPLSYQH	29.028	8.843	13.638		postGMF-runs\1client\WT_analysis\more_scans\OFD1\OFD1_857-872_output	1client	WT	unknown	AAVPLSYQHPSVDQKQ	rank_019	0.8	B-C	1.06955	B	A,4-11	PLSYQHPS	23.766	12.042	16.514
postGMF-runs\2client\WT_analysis\more_scans\OFD1\OFD1_857-872_output	2client	WT	unknown	AAVPLSYQHPSVDQKQ	rank_016	0.78	C-D	0.966364	C	B,2-9	AVPLSYQH	29.62	8.571	13.566		postGMF-runs\1client\WT_analysis\more_scans\OFD1\OFD1_857-872_output	1client	WT	unknown	AAVPLSYQHPSVDQKQ	rank_007	0.82	B-C	0.976364	B	A,2-9	AVPLSYQH	23.047	12.142	15.329
postGMF-runs\2client\WT_analysis\more_scans\OFD1\OFD1_857-872_output	2client	WT	unknown	AAVPLSYQHPSVDQKQ	rank_016	0.78	C-D	0.966364	D	A,2-9	AVPLSYQH	28.432	8.658	13.759		postGMF-runs\1client\WT_analysis\more_scans\OFD1\OFD1_857-872_output	1client	WT	unknown	AAVPLSYQHPSVDQKQ	rank_007	0.82	B-C	0.976364	B	A,2-9	AVPLSYQH	23.047	12.142	15.329
postGMF-runs\2client\WT_analysis\more_scans\OFD1\OFD1_857-872_output	2client	WT	unknown	AAVPLSYQHPSVDQKQ	rank_025	0.75	C-D	1.15955	C	B,1-8	AAVPLSYQ	28.586	8.938	13.036		postGMF-runs\1client\WT_analysis\more_scans\OFD1\OFD1_857-872_output	1client	WT	unknown	AAVPLSYQHPSVDQKQ	rank_013	0.81	B-C	0.996667	B	A,3-10	VPLSYQHP	22.88	12.378	15.644
postGMF-runs\2client\WT_analysis\more_scans\OFD1\OFD1_857-872_output	2client	WT	unknown	AAVPLSYQHPSVDQKQ	rank_025	0.75	C-D	1.15955	D	A,1-8	AAVPLSYQ	28.24	8.872	12.877		postGMF-runs\1client\WT_analysis\more_scans\OFD1\OFD1_857-872_output	1client	WT	unknown	AAVPLSYQHPSVDQKQ	rank_013	0.81	B-C	0.996667	B	A,3-10	VPLSYQHP	22.88	12.378	15.644
postGMF-runs\2client\WT_analysis\more_scans\RavL\RavL_1489-1504_output	2client	WT	unknown	AAYPTTMKEGNRSILC	rank_001	0.81	C-D	1.025	D	B,3-10	YPTTMKEG	47.368	4.456	9.878		postGMF-runs\1client\WT_analysis\more_scans\RavL\RavL_1489-1504_output	1client	WT	unknown	AAYPTTMKEGNRSILC	rank_002	0.82	B-C	1.00115	C	A,3-10	YPTTMKEG	33.055	9.931	13.101
postGMF-runs\2client\WT_analysis\more_scans\RavL\RavL_1489-1504_output	2client	WT	unknown	AAYPTTMKEGNRSILC	rank_001	0.81	C-D	1.025	C	A,2-9	AYPTTMKE	44.109	5.391	10.555		postGMF-runs\1client\WT_analysis\more_scans\RavL\RavL_1489-1504_output	1client	WT	unknown	AAYPTTMKEGNRSILC	rank_002	0.82	B-C	1.00115	C	A,3-10	YPTTMKEG	33.055	9.931	13.101
postGMF-runs\2client\WT_analysis\more_scans\RavL\RavL_1489-1504_output	2client	WT	unknown	AAYPTTMKEGNRSILC	rank_012	0.79	C-D	0.9925	D	A,2-9	AYPTTMKE	42.86	6.419	11.133		postGMF-runs\1client\WT_analysis\more_scans\RavL\RavL_1489-1504_output	1client	WT	unknown	AAYPTTMKEGNRSILC	rank_004	0.82	B-C	0.992692	B	A,3-10	YPTTMKEG	32.475	10.205	13.514
postGMF-runs\2client\WT_analysis\more_scans\RavL\RavL_1489-1504_output	2client	WT	unknown	AAYPTTMKEGNRSILC	rank_012	0.79	C-D	0.9925	C	B,2-9	AYPTTMKE	37.653	7.333	11.962		postGMF-runs\1client\WT_analysis\more_scans\RavL\RavL_1489-1504_output	1client	WT	unknown	AAYPTTMKEGNRSILC	rank_004	0.82	B-C	0.992692	B	A,3-10	YPTTMKEG	32.475	10.205	13.514
postGMF-runs\2client\WT_analysis\more_scans\RavL\RavL_1489-1504_output	2client	WT	unknown	AAYPTTMKEGNRSILC	rank_008	0.79	C-D	0.969545	C	A,2-9	AYPTTMKE	42.358	6.38	11.474		postGMF-runs\1client\WT_analysis\more_scans\RavL\RavL_1489-1504_output	1client	WT	unknown	AAYPTTMKEGNRSILC	rank_013	0.82	B-C	0.989231	C	A,4-11	PTTMKEGN	28.974	11.082	13.946
postGMF-runs\2client\WT_analysis\more_scans\RavL\RavL_1489-1504_output	2client	WT	unknown	AAYPTTMKEGNRSILC	rank_008	0.79	C-D	0.969545	D	B,2-9	AYPTTMKE	41.249	6.464	11.52		postGMF-runs\1client\WT_analysis\more_scans\RavL\RavL_1489-1504_output	1client	WT	unknown	AAYPTTMKEGNRSILC	rank_013	0.82	B-C	0.989231	C	A,4-11	PTTMKEGN	28.974	11.082	13.946
postGMF-runs\2client\WT_analysis\more_scans\RavL\RavL_1489-1504_output	2client	WT	unknown	AAYPTTMKEGNRSILC	rank_002	0.8	C-D	1.02136	D	B,2-9	AYPTTMKE	41.168	5.659	10.706		postGMF-runs\1client\WT_analysis\more_scans\RavL\RavL_1489-1504_output	1client	WT	unknown	AAYPTTMKEGNRSILC	rank_017	0.81	B-C	0.988462	C	A,2-9	AYPTTMKE	28.378	11.589	14.261
postGMF-runs\2client\WT_analysis\more_scans\RavL\RavL_1489-1504_output	2client	WT	unknown	AAYPTTMKEGNRSILC	rank_002	0.8	C-D	1.02136	C	A,2-9	AYPTTMKE	41.016	5.583	10.699		postGMF-runs\1client\WT_analysis\more_scans\RavL\RavL_1489-1504_output	1client	WT	unknown	AAYPTTMKEGNRSILC	rank_017	0.81	B-C	0.988462	C	A,2-9	AYPTTMKE	28.378	11.589	14.261
postGMF-runs\2client\WT_analysis\more_scans\RavL\RavL_1489-1504_output	2client	WT	unknown	AAYPTTMKEGNRSILC	rank_010	0.79	C-D	0.971818	D	A,2-9	AYPTTMKE	40.955	6.579	11.539		postGMF-runs\1client\WT_analysis\more_scans\RavL\RavL_1489-1504_output	1client	WT	unknown	AAYPTTMKEGNRSILC	rank_014	0.82	B-C	1.0465	B	A,1-8	AAYPTTMK	26.748	12.059	13.778
postGMF-runs\2client\WT_analysis\more_scans\RavL\RavL_1489-1504_output	2client	WT	unknown	AAYPTTMKEGNRSILC	rank_010	0.79	C-D	0.971818	C	B,2-9	AYPTTMKE	40.949	6.522	11.592		postGMF-runs\1client\WT_analysis\more_scans\RavL\RavL_1489-1504_output	1client	WT	unknown	AAYPTTMKEGNRSILC	rank_014	0.82	B-C	1.0465	B	A,1-8	AAYPTTMK	26.748	12.059	13.778
postGMF-runs\2client\WT_analysis\more_scans\RavL\RavL_1489-1504_output	2client	WT	unknown	AAYPTTMKEGNRSILC	rank_011	0.79	C-D	0.957727	C	A,2-9	AYPTTMKE	40.446	6.543	11.085		postGMF-runs\1client\WT_analysis\more_scans\RavL\RavL_1489-1504_output	1client	WT	unknown	AAYPTTMKEGNRSILC	rank_006	0.82	B-C	1.02682	B	A,1-8	AAYPTTMK	26.721	11.345	13.723
postGMF-runs\2client\WT_analysis\more_scans\RavL\RavL_1489-1504_output	2client	WT	unknown	AAYPTTMKEGNRSILC	rank_011	0.79	C-D	0.957727	D	B,2-9	AYPTTMKE	39.225	6.761	11.322		postGMF-runs\1client\WT_analysis\more_scans\RavL\RavL_1489-1504_output	1client	WT	unknown	AAYPTTMKEGNRSILC	rank_006	0.82	B-C	1.02682	B	A,1-8	AAYPTTMK	26.721	11.345	13.723
postGMF-runs\2client\WT_analysis\more_scans\RavL\RavL_1489-1504_output	2client	WT	unknown	AAYPTTMKEGNRSILC	rank_013	0.79	C-D	1.03318	C	A,3-10	YPTTMKEG	40.445	6.75	11.617		postGMF-runs\1client\WT_analysis\more_scans\RavL\RavL_1489-1504_output	1client	WT	unknown	AAYPTTMKEGNRSILC	rank_010	0.82	B-C	1.00773	B	A,2-9	AYPTTMKE	26.659	11.513	14.293
postGMF-runs\2client\WT_analysis\more_scans\RavL\RavL_1489-1504_output	2client	WT	unknown	AAYPTTMKEGNRSILC	rank_013	0.79	C-D	1.03318	D	B,3-10	YPTTMKEG	38.793	7.067	11.848		postGMF-runs\1client\WT_analysis\more_scans\RavL\RavL_1489-1504_output	1client	WT	unknown	AAYPTTMKEGNRSILC	rank_010	0.82	B-C	1.00773	B	A,2-9	AYPTTMKE	26.659	11.513	14.293
postGMF-runs\2client\WT_analysis\more_scans\RavL\RavL_1489-1504_output	2client	WT	unknown	AAYPTTMKEGNRSILC	rank_020	0.78	C-D	1.06091	D	A,2-9	AYPTTMKE	40.402	6.976	11.817		postGMF-runs\1client\WT_analysis\more_scans\RavL\RavL_1489-1504_output	1client	WT	unknown	AAYPTTMKEGNRSILC	rank_024	0.81	B-C	1.03308	C	A,2-9	AYPTTMKE	26.309	13.329	15.889
postGMF-runs\2client\WT_analysis\more_scans\RavL\RavL_1489-1504_output	2client	WT	unknown	AAYPTTMKEGNRSILC	rank_007	0.79	C-D	1.04455	C	A,3-10	YPTTMKEG	40.325	6.856	11.749		postGMF-runs\1client\WT_analysis\more_scans\RavL\RavL_1489-1504_output	1client	WT	unknown	AAYPTTMKEGNRSILC	rank_003	0.82	B-C	0.98625	B	A,4-11	PTTMKEGN	26.251	11.645	15.292
postGMF-runs\2client\WT_analysis\more_scans\RavL\RavL_1489-1504_output	2client	WT	unknown	AAYPTTMKEGNRSILC	rank_007	0.79	C-D	1.04455	D	B,3-10	YPTTMKEG	40.31	6.869	11.72		postGMF-runs\1client\WT_analysis\more_scans\RavL\RavL_1489-1504_output	1client	WT	unknown	AAYPTTMKEGNRSILC	rank_003	0.82	B-C	0.98625	B	A,4-11	PTTMKEGN	26.251	11.645	15.292
postGMF-runs\2client\WT_analysis\more_scans\RavL\RavL_1489-1504_output	2client	WT	unknown	AAYPTTMKEGNRSILC	rank_009	0.79	C-D	1.00615	C	B,2-9	AYPTTMKE	40.294	6.547	11.079		postGMF-runs\1client\WT_analysis\more_scans\RavL\RavL_1489-1504_output	1client	WT	unknown	AAYPTTMKEGNRSILC	rank_019	0.81	B-C	1.00333	B	A,3-10	YPTTMKEG	24.719	12.435	15.68
postGMF-runs\2client\WT_analysis\more_scans\RavL\RavL_1489-1504_output	2client	WT	unknown	AAYPTTMKEGNRSILC	rank_009	0.79	C-D	1.00615	D	A,2-9	AYPTTMKE	39.726	6.687	11.316		postGMF-runs\1client\WT_analysis\more_scans\RavL\RavL_1489-1504_output	1client	WT	unknown	AAYPTTMKEGNRSILC	rank_019	0.81	B-C	1.00333	B	A,3-10	YPTTMKEG	24.719	12.435	15.68
postGMF-runs\2client\WT_analysis\more_scans\RavL\RavL_1489-1504_output	2client	WT	unknown	AAYPTTMKEGNRSILC	rank_018	0.78	C-D	0.979091	D	B,1-8	AAYPTTMK	39.42	7.05	11.784		postGMF-runs\1client\WT_analysis\more_scans\RavL\RavL_1489-1504_output	1client	WT	unknown	AAYPTTMKEGNRSILC	rank_016	0.81	B-C	0.985833	C	A,2-9	AYPTTMKE	24.142	12.552	15.397
postGMF-runs\2client\WT_analysis\more_scans\RavL\RavL_1489-1504_output	2client	WT	unknown	AAYPTTMKEGNRSILC	rank_022	0.78	C-D	0.982692	C	B,2-9	AYPTTMKE	36.339	7.103	12.425		postGMF-runs\1client\WT_analysis\more_scans\RavL\RavL_1489-1504_output	1client	WT	unknown	AAYPTTMKEGNRSILC	rank_015	0.82	B-C	0.99625	B	A,2-9	AYPTTMKE	23.768	12.226	14.999
postGMF-runs\2client\WT_analysis\more_scans\ZMYM3\ZMYM3_1105-1120_output	2client	WT	unknown	ACSAAELNYGLAQFVR	rank_017	0.78	C-D	1.10455	D	A,8-15	NYGLAQFV	52.469	7.64	11.54		postGMF-runs\1client\WT_analysis\more_scans\ZMYM3\ZMYM3_1105-1120_output	1client	WT	unknown	ACSAAELNYGLAQFVR	rank_001	0.83	B-C	1.04808	B	A,3-10	SAAELNYG	42.769	9.402	13.193
postGMF-runs\2client\WT_analysis\more_scans\ZMYM3\ZMYM3_1105-1120_output	2client	WT	unknown	ACSAAELNYGLAQFVR	rank_017	0.78	C-D	1.10455	C	B,8-15	NYGLAQFV	50.625	7.898	11.773		postGMF-runs\1client\WT_analysis\more_scans\ZMYM3\ZMYM3_1105-1120_output	1client	WT	unknown	ACSAAELNYGLAQFVR	rank_001	0.83	B-C	1.04808	B	A,3-10	SAAELNYG	42.769	9.402	13.193
postGMF-runs\2client\WT_analysis\more_scans\ZMYM3\ZMYM3_1105-1120_output	2client	WT	unknown	ACSAAELNYGLAQFVR	rank_003	0.79	C-D	1.0235	C	A,5-12	AELNYGLA	46.196	6.346	11.872		postGMF-runs\1client\WT_analysis\more_scans\ZMYM3\ZMYM3_1105-1120_output	1client	WT	unknown	ACSAAELNYGLAQFVR	rank_010	0.81	B-C	1.03846	B	A,3-10	SAAELNYG	36.854	10.709	14.979
postGMF-runs\2client\WT_analysis\more_scans\ZMYM3\ZMYM3_1105-1120_output	2client	WT	unknown	ACSAAELNYGLAQFVR	rank_003	0.79	C-D	1.0235	D	B,4-11	AAELNYGL	42.148	7.387	12.012		postGMF-runs\1client\WT_analysis\more_scans\ZMYM3\ZMYM3_1105-1120_output	1client	WT	unknown	ACSAAELNYGLAQFVR	rank_010	0.81	B-C	1.03846	B	A,3-10	SAAELNYG	36.854	10.709	14.979
postGMF-runs\2client\WT_analysis\more_scans\ZMYM3\ZMYM3_1105-1120_output	2client	WT	unknown	ACSAAELNYGLAQFVR	rank_001	0.81	C-D	1.00227	D	A,7-14	LNYGLAQF	43.335	5.311	10.434		postGMF-runs\1client\WT_analysis\more_scans\ZMYM3\ZMYM3_1105-1120_output	1client	WT	unknown	ACSAAELNYGLAQFVR	rank_006	0.82	B-C	1.03077	B	A,3-10	SAAELNYG	36.715	10.662	15.333
postGMF-runs\2client\WT_analysis\more_scans\ZMYM3\ZMYM3_1105-1120_output	2client	WT	unknown	ACSAAELNYGLAQFVR	rank_001	0.81	C-D	1.00227	C	B,6-13	ELNYGLAQ	41.84	5.481	10.596		postGMF-runs\1client\WT_analysis\more_scans\ZMYM3\ZMYM3_1105-1120_output	1client	WT	unknown	ACSAAELNYGLAQFVR	rank_006	0.82	B-C	1.03077	B	A,3-10	SAAELNYG	36.715	10.662	15.333
postGMF-runs\2client\WT_analysis\more_scans\ZMYM3\ZMYM3_1105-1120_output	2client	WT	unknown	ACSAAELNYGLAQFVR	rank_008	0.78	C-D	1.18909	C	B,2-9	CSAAELNY	41.888	6.459	12.029		postGMF-runs\1client\WT_analysis\more_scans\ZMYM3\ZMYM3_1105-1120_output	1client	WT	unknown	ACSAAELNYGLAQFVR	rank_011	0.81	B-C	1.10182	B	A,7-14	LNYGLAQF	34.265	8.496	13.664
postGMF-runs\2client\WT_analysis\more_scans\ZMYM3\ZMYM3_1105-1120_output	2client	WT	unknown	ACSAAELNYGLAQFVR	rank_008	0.78	C-D	1.18909	D	A,2-9	CSAAELNY	41.429	6.517	12.023		postGMF-runs\1client\WT_analysis\more_scans\ZMYM3\ZMYM3_1105-1120_output	1client	WT	unknown	ACSAAELNYGLAQFVR	rank_011	0.81	B-C	1.10182	B	A,7-14	LNYGLAQF	34.265	8.496	13.664
postGMF-runs\2client\WT_analysis\more_scans\ZMYM3\ZMYM3_1105-1120_output	2client	WT	unknown	ACSAAELNYGLAQFVR	rank_021	0.76	C-D	1.30955	D	A,4-11	AAELNYGL	39.485	7.35	12.588		postGMF-runs\1client\WT_analysis\more_scans\ZMYM3\ZMYM3_1105-1120_output	1client	WT	unknown	ACSAAELNYGLAQFVR	rank_007	0.82	B-C	1.06792	B	A,7-14	LNYGLAQF	33.4	9.682	13.808
postGMF-runs\2client\WT_analysis\more_scans\ZMYM3\ZMYM3_1105-1120_output	2client	WT	unknown	ACSAAELNYGLAQFVR	rank_021	0.76	C-D	1.30955	C	B,4-11	AAELNYGL	39.461	7.425	12.599		postGMF-runs\1client\WT_analysis\more_scans\ZMYM3\ZMYM3_1105-1120_output	1client	WT	unknown	ACSAAELNYGLAQFVR	rank_007	0.82	B-C	1.06792	B	A,7-14	LNYGLAQF	33.4	9.682	13.808
postGMF-runs\2client\WT_analysis\more_scans\ZMYM3\ZMYM3_1105-1120_output	2client	WT	unknown	ACSAAELNYGLAQFVR	rank_010	0.78	C-D	1.04682	D	B,2-9	CSAAELNY	39.069	7.019	12.477		postGMF-runs\1client\WT_analysis\more_scans\ZMYM3\ZMYM3_1105-1120_output	1client	WT	unknown	ACSAAELNYGLAQFVR	rank_004	0.82	B-C	1.04409	B	A,5-12	AELNYGLA	33.267	9.331	13.852
postGMF-runs\2client\WT_analysis\more_scans\ZMYM3\ZMYM3_1105-1120_output	2client	WT	unknown	ACSAAELNYGLAQFVR	rank_010	0.78	C-D	1.04682	C	A,2-9	CSAAELNY	37.135	7.213	12.72		postGMF-runs\1client\WT_analysis\more_scans\ZMYM3\ZMYM3_1105-1120_output	1client	WT	unknown	ACSAAELNYGLAQFVR	rank_004	0.82	B-C	1.04409	B	A,5-12	AELNYGLA	33.267	9.331	13.852
postGMF-runs\2client\WT_analysis\more_scans\ZMYM3\ZMYM3_1105-1120_output	2client	WT	unknown	ACSAAELNYGLAQFVR	rank_016	0.78	C-D	1.06682	C	A,2-9	CSAAELNY	38.316	7.166	12.593		postGMF-runs\1client\WT_analysis\more_scans\ZMYM3\ZMYM3_1105-1120_output	1client	WT	unknown	ACSAAELNYGLAQFVR	rank_020	0.8	B-C	1.16318	C	A,7-14	LNYGLAQF	31.331	9.415	14.24
postGMF-runs\2client\WT_analysis\more_scans\ZMYM3\ZMYM3_1105-1120_output	2client	WT	unknown	ACSAAELNYGLAQFVR	rank_016	0.78	C-D	1.06682	D	B,2-9	CSAAELNY	38.226	7.189	12.629		postGMF-runs\1client\WT_analysis\more_scans\ZMYM3\ZMYM3_1105-1120_output	1client	WT	unknown	ACSAAELNYGLAQFVR	rank_020	0.8	B-C	1.16318	C	A,7-14	LNYGLAQF	31.331	9.415	14.24
postGMF-runs\2client\WT_analysis\more_scans\ZMYM3\ZMYM3_1105-1120_output	2client	WT	unknown	ACSAAELNYGLAQFVR	rank_002	0.79	C-D	1.00682	C	A,4-11	AAELNYGL	38.182	6.44	12.222		postGMF-runs\1client\WT_analysis\more_scans\ZMYM3\ZMYM3_1105-1120_output	1client	WT	unknown	ACSAAELNYGLAQFVR	rank_021	0.8	B-C	1.20091	B	A,6-13	ELNYGLAQ	30.886	10.005	14.539
postGMF-runs\2client\WT_analysis\more_scans\ZMYM3\ZMYM3_1105-1120_output	2client	WT	unknown	ACSAAELNYGLAQFVR	rank_002	0.79	C-D	1.00682	D	B,4-11	AAELNYGL	37.834	6.467	12.191		postGMF-runs\1client\WT_analysis\more_scans\ZMYM3\ZMYM3_1105-1120_output	1client	WT	unknown	ACSAAELNYGLAQFVR	rank_021	0.8	B-C	1.20091	B	A,6-13	ELNYGLAQ	30.886	10.005	14.539
postGMF-runs\2client\WT_analysis\more_scans\ZMYM3\ZMYM3_1105-1120_output	2client	WT	unknown	ACSAAELNYGLAQFVR	rank_007	0.78	C-D	1.01909	C	A,7-14	LNYGLAQF	38.011	6.816	12.775		postGMF-runs\1client\WT_analysis\more_scans\ZMYM3\ZMYM3_1105-1120_output	1client	WT	unknown	ACSAAELNYGLAQFVR	rank_013	0.81	B-C	1.07625	C	A,6-13	ELNYGLAQ	30.879	9.901	14.209
postGMF-runs\2client\WT_analysis\more_scans\ZMYM3\ZMYM3_1105-1120_output	2client	WT	unknown	ACSAAELNYGLAQFVR	rank_007	0.78	C-D	1.01909	D	B,7-14	LNYGLAQF	37.894	6.803	12.853		postGMF-runs\1client\WT_analysis\more_scans\ZMYM3\ZMYM3_1105-1120_output	1client	WT	unknown	ACSAAELNYGLAQFVR	rank_013	0.81	B-C	1.07625	C	A,6-13	ELNYGLAQ	30.879	9.901	14.209
postGMF-runs\2client\WT_analysis\more_scans\ZMYM3\ZMYM3_1105-1120_output	2client	WT	unknown	ACSAAELNYGLAQFVR	rank_020	0.76	C-D	1.24045	C	A,6-13	ELNYGLAQ	37.891	7.421	12.917		postGMF-runs\1client\WT_analysis\more_scans\ZMYM3\ZMYM3_1105-1120_output	1client	WT	unknown	ACSAAELNYGLAQFVR	rank_015	0.81	B-C	1.10136	B	A,6-13	ELNYGLAQ	30.425	9.628	14.447
postGMF-runs\2client\WT_analysis\more_scans\ZMYM3\ZMYM3_1105-1120_output	2client	WT	unknown	ACSAAELNYGLAQFVR	rank_020	0.76	C-D	1.24045	D	B,6-13	ELNYGLAQ	37.464	7.538	12.917		postGMF-runs\1client\WT_analysis\more_scans\ZMYM3\ZMYM3_1105-1120_output	1client	WT	unknown	ACSAAELNYGLAQFVR	rank_015	0.81	B-C	1.10136	B	A,6-13	ELNYGLAQ	30.425	9.628	14.447
postGMF-runs\2client\WT_analysis\more_scans\ZMYM3\ZMYM3_1105-1120_output	2client	WT	unknown	ACSAAELNYGLAQFVR	rank_013	0.77	C-D	1.17727	D	A,5-12	AELNYGLA	37.799	7.093	12.65		postGMF-runs\1client\WT_analysis\more_scans\ZMYM3\ZMYM3_1105-1120_output	1client	WT	unknown	ACSAAELNYGLAQFVR	rank_005	0.82	B-C	1.02231	C	A,5-12	AELNYGLA	30.42	10.79	15.327
postGMF-runs\2client\WT_analysis\more_scans\ZMYM3\ZMYM3_1105-1120_output	2client	WT	unknown	ACSAAELNYGLAQFVR	rank_013	0.77	C-D	1.17727	C	B,5-12	AELNYGLA	37.183	7.124	12.772		postGMF-runs\1client\WT_analysis\more_scans\ZMYM3\ZMYM3_1105-1120_output	1client	WT	unknown	ACSAAELNYGLAQFVR	rank_005	0.82	B-C	1.02231	C	A,5-12	AELNYGLA	30.42	10.79	15.327
postGMF-runs\2client\WT_analysis\more_scans\ZMYM3\ZMYM3_1105-1120_output	2client	WT	unknown	ACSAAELNYGLAQFVR	rank_022	0.76	C-D	1.22458	D	A,4-11	AAELNYGL	37.291	7.657	12.791		postGMF-runs\1client\WT_analysis\more_scans\ZMYM3\ZMYM3_1105-1120_output	1client	WT	unknown	ACSAAELNYGLAQFVR	rank_009	0.82	B-C	1.03045	C	A,5-12	AELNYGLA	29.284	10.607	14.88
postGMF-runs\2client\WT_analysis\more_scans\ZMYM3\ZMYM3_1105-1120_output	2client	WT	unknown	ACSAAELNYGLAQFVR	rank_022	0.76	C-D	1.22458	C	B,4-11	AAELNYGL	37.026	7.676	12.785		postGMF-runs\1client\WT_analysis\more_scans\ZMYM3\ZMYM3_1105-1120_output	1client	WT	unknown	ACSAAELNYGLAQFVR	rank_009	0.82	B-C	1.03045	C	A,5-12	AELNYGLA	29.284	10.607	14.88
postGMF-runs\2client\WT_analysis\more_scans\ZMYM3\ZMYM3_1105-1120_output	2client	WT	unknown	ACSAAELNYGLAQFVR	rank_005	0.78	C-D	1.05955	C	B,2-9	CSAAELNY	36.481	7.374	12.649		postGMF-runs\1client\WT_analysis\more_scans\ZMYM3\ZMYM3_1105-1120_output	1client	WT	unknown	ACSAAELNYGLAQFVR	rank_019	0.8	B-C	1.1	C	A,4-11	AAELNYGL	28.971	10.851	15.691
postGMF-runs\2client\WT_analysis\more_scans\ZMYM3\ZMYM3_1105-1120_output	2client	WT	unknown	ACSAAELNYGLAQFVR	rank_005	0.78	C-D	1.05955	D	A,2-9	CSAAELNY	35.855	7.474	12.829		postGMF-runs\1client\WT_analysis\more_scans\ZMYM3\ZMYM3_1105-1120_output	1client	WT	unknown	ACSAAELNYGLAQFVR	rank_019	0.8	B-C	1.1	C	A,4-11	AAELNYGL	28.971	10.851	15.691
postGMF-runs\2client\WT_analysis\more_scans\ZMYM3\ZMYM3_1105-1120_output	2client	WT	unknown	ACSAAELNYGLAQFVR	rank_018	0.77	C-D	1.10591	C	B,3-10	SAAELNYG	36.48	7.445	13.472		postGMF-runs\1client\WT_analysis\more_scans\ZMYM3\ZMYM3_1105-1120_output	1client	WT	unknown	ACSAAELNYGLAQFVR	rank_002	0.82	B-C	0.9975	B	A,7-14	LNYGLAQF	28.635	10.523	14.427
postGMF-runs\2client\WT_analysis\more_scans\ZMYM3\ZMYM3_1105-1120_output	2client	WT	unknown	ACSAAELNYGLAQFVR	rank_018	0.77	C-D	1.10591	D	A,3-10	SAAELNYG	36.329	7.479	13.547		postGMF-runs\1client\WT_analysis\more_scans\ZMYM3\ZMYM3_1105-1120_output	1client	WT	unknown	ACSAAELNYGLAQFVR	rank_002	0.82	B-C	0.9975	B	A,7-14	LNYGLAQF	28.635	10.523	14.427
postGMF-runs\2client\WT_analysis\more_scans\ZMYM3\ZMYM3_1105-1120_output	2client	WT	unknown	ACSAAELNYGLAQFVR	rank_023	0.76	C-D	1.28682	D	A,5-12	AELNYGLA	36.309	7.906	13.433		postGMF-runs\1client\WT_analysis\more_scans\ZMYM3\ZMYM3_1105-1120_output	1client	WT	unknown	ACSAAELNYGLAQFVR	rank_014	0.81	B-C	0.98625	C	A,3-10	SAAELNYG	28.581	11.655	16.925
postGMF-runs\2client\WT_analysis\more_scans\ZMYM3\ZMYM3_1105-1120_output	2client	WT	unknown	ACSAAELNYGLAQFVR	rank_023	0.76	C-D	1.28682	C	B,5-12	AELNYGLA	35.65	8.185	13.717		postGMF-runs\1client\WT_analysis\more_scans\ZMYM3\ZMYM3_1105-1120_output	1client	WT	unknown	ACSAAELNYGLAQFVR	rank_014	0.81	B-C	0.98625	C	A,3-10	SAAELNYG	28.581	11.655	16.925
postGMF-runs\2client\WT_analysis\more_scans\ZMYM3\ZMYM3_1105-1120_output	2client	WT	unknown	ACSAAELNYGLAQFVR	rank_009	0.78	C-D	0.973182	C	B,5-12	AELNYGLA	34.874	7.283	13.206		postGMF-runs\1client\WT_analysis\more_scans\ZMYM3\ZMYM3_1105-1120_output	1client	WT	unknown	ACSAAELNYGLAQFVR	rank_017	0.8	B-C	1.10773	C	A,4-11	AAELNYGL	28.544	10.807	15.808
postGMF-runs\2client\WT_analysis\more_scans\ZMYM3\ZMYM3_1105-1120_output	2client	WT	unknown	ACSAAELNYGLAQFVR	rank_009	0.78	C-D	0.973182	D	A,5-12	AELNYGLA	33.385	7.502	13.602		postGMF-runs\1client\WT_analysis\more_scans\ZMYM3\ZMYM3_1105-1120_output	1client	WT	unknown	ACSAAELNYGLAQFVR	rank_017	0.8	B-C	1.10773	C	A,4-11	AAELNYGL	28.544	10.807	15.808
postGMF-runs\2client\WT_analysis\more_scans\ZMYM3\ZMYM3_1105-1120_output	2client	WT	unknown	ACSAAELNYGLAQFVR	rank_006	0.78	C-D	1.06091	D	A,7-14	LNYGLAQF	34.835	7.192	12.927		postGMF-runs\1client\WT_analysis\more_scans\ZMYM3\ZMYM3_1105-1120_output	1client	WT	unknown	ACSAAELNYGLAQFVR	rank_003	0.82	B-C	0.99	C	A,2-9	CSAAELNY	27.739	12.115	16.532
postGMF-runs\2client\WT_analysis\more_scans\ZMYM3\ZMYM3_1105-1120_output	2client	WT	unknown	ACSAAELNYGLAQFVR	rank_006	0.78	C-D	1.06091	C	B,7-14	LNYGLAQF	34.156	7.349	13.192		postGMF-runs\1client\WT_analysis\more_scans\ZMYM3\ZMYM3_1105-1120_output	1client	WT	unknown	ACSAAELNYGLAQFVR	rank_003	0.82	B-C	0.99	C	A,2-9	CSAAELNY	27.739	12.115	16.532
postGMF-runs\2client\WT_analysis\more_scans\ZMYM3\ZMYM3_1105-1120_output	2client	WT	unknown	ACSAAELNYGLAQFVR	rank_015	0.78	C-D	1.09318	D	A,3-10	SAAELNYG	34.491	7.571	13.072		postGMF-runs\1client\WT_analysis\more_scans\ZMYM3\ZMYM3_1105-1120_output	1client	WT	unknown	ACSAAELNYGLAQFVR	rank_025	0.79	B-C	1.1955	C	A,4-11	AAELNYGL	27.447	11.661	17.009
postGMF-runs\2client\WT_analysis\more_scans\ZMYM3\ZMYM3_1105-1120_output	2client	WT	unknown	ACSAAELNYGLAQFVR	rank_015	0.78	C-D	1.09318	C	B,3-10	SAAELNYG	34.451	7.586	13.099		postGMF-runs\1client\WT_analysis\more_scans\ZMYM3\ZMYM3_1105-1120_output	1client	WT	unknown	ACSAAELNYGLAQFVR	rank_025	0.79	B-C	1.1955	C	A,4-11	AAELNYGL	27.447	11.661	17.009
postGMF-runs\2client\WT_analysis\more_scans\ZMYM3\ZMYM3_1105-1120_output	2client	WT	unknown	ACSAAELNYGLAQFVR	rank_004	0.78	C-D	0.993182	D	A,5-12	AELNYGLA	34.316	7.488	14.1		postGMF-runs\1client\WT_analysis\more_scans\ZMYM3\ZMYM3_1105-1120_output	1client	WT	unknown	ACSAAELNYGLAQFVR	rank_018	0.8	B-C	1.135	B	A,4-11	AAELNYGL	27.253	11.079	16.1
postGMF-runs\2client\WT_analysis\more_scans\ZMYM3\ZMYM3_1105-1120_output	2client	WT	unknown	ACSAAELNYGLAQFVR	rank_004	0.78	C-D	0.993182	C	B,5-12	AELNYGLA	33.907	7.682	14.415		postGMF-runs\1client\WT_analysis\more_scans\ZMYM3\ZMYM3_1105-1120_output	1client	WT	unknown	ACSAAELNYGLAQFVR	rank_018	0.8	B-C	1.135	B	A,4-11	AAELNYGL	27.253	11.079	16.1
postGMF-runs\2client\WT_analysis\more_scans\ZMYM3\ZMYM3_1105-1120_output	2client	WT	unknown	ACSAAELNYGLAQFVR	rank_012	0.78	C-D	0.993636	C	A,5-12	AELNYGLA	33.799	7.502	13.593		postGMF-runs\1client\WT_analysis\more_scans\ZMYM3\ZMYM3_1105-1120_output	1client	WT	unknown	ACSAAELNYGLAQFVR	rank_016	0.81	B-C	1.04318	C	A,5-12	AELNYGLA	27.066	11.302	15.462
postGMF-runs\2client\WT_analysis\more_scans\ZMYM3\ZMYM3_1105-1120_output	2client	WT	unknown	ACSAAELNYGLAQFVR	rank_012	0.78	C-D	0.993636	D	B,5-12	AELNYGLA	32.875	7.681	13.83		postGMF-runs\1client\WT_analysis\more_scans\ZMYM3\ZMYM3_1105-1120_output	1client	WT	unknown	ACSAAELNYGLAQFVR	rank_016	0.81	B-C	1.04318	C	A,5-12	AELNYGLA	27.066	11.302	15.462
postGMF-runs\2client\WT_analysis\more_scans\ZMYM3\ZMYM3_1105-1120_output	2client	WT	unknown	ACSAAELNYGLAQFVR	rank_024	0.76	C-D	1.205	C	A,6-13	ELNYGLAQ	33.729	8.003	13.301		postGMF-runs\1client\WT_analysis\more_scans\ZMYM3\ZMYM3_1105-1120_output	1client	WT	unknown	ACSAAELNYGLAQFVR	rank_012	0.81	B-C	0.995417	C	A,1-8	ACSAAELN	25.302	12.473	16.002
postGMF-runs\2client\WT_analysis\more_scans\ZMYM3\ZMYM3_1105-1120_output	2client	WT	unknown	ACSAAELNYGLAQFVR	rank_024	0.76	C-D	1.205	D	B,6-13	ELNYGLAQ	33.429	8.098	13.309		postGMF-runs\1client\WT_analysis\more_scans\ZMYM3\ZMYM3_1105-1120_output	1client	WT	unknown	ACSAAELNYGLAQFVR	rank_012	0.81	B-C	0.995417	C	A,1-8	ACSAAELN	25.302	12.473	16.002
postGMF-runs\2client\WT_analysis\more_scans\ZMYM3\ZMYM3_1105-1120_output	2client	WT	unknown	ACSAAELNYGLAQFVR	rank_019	0.77	C-D	1.09409	C	A,7-14	LNYGLAQF	33.36	7.159	12.644		postGMF-runs\1client\WT_analysis\more_scans\ZMYM3\ZMYM3_1105-1120_output	1client	WT	unknown	ACSAAELNYGLAQFVR	rank_024	0.8	B-C	1.178	C	A,5-12	AELNYGLA	25.29	12.362	17.187
postGMF-runs\2client\WT_analysis\more_scans\ZMYM3\ZMYM3_1105-1120_output	2client	WT	unknown	ACSAAELNYGLAQFVR	rank_019	0.77	C-D	1.09409	D	B,7-14	LNYGLAQF	32.66	7.141	12.698		postGMF-runs\1client\WT_analysis\more_scans\ZMYM3\ZMYM3_1105-1120_output	1client	WT	unknown	ACSAAELNYGLAQFVR	rank_024	0.8	B-C	1.178	C	A,5-12	AELNYGLA	25.29	12.362	17.187
postGMF-runs\2client\WT_analysis\more_scans\ZMYM3\ZMYM3_1105-1120_output	2client	WT	unknown	ACSAAELNYGLAQFVR	rank_014	0.78	C-D	0.984091	C	B,6-13	ELNYGLAQ	33.14	7.767	13.482		postGMF-runs\1client\WT_analysis\more_scans\ZMYM3\ZMYM3_1105-1120_output	1client	WT	unknown	ACSAAELNYGLAQFVR	rank_008	0.82	B-C	0.990417	B	A,1-8	ACSAAELN	25.118	12.75	16.246
postGMF-runs\2client\WT_analysis\more_scans\ZMYM3\ZMYM3_1105-1120_output	2client	WT	unknown	ACSAAELNYGLAQFVR	rank_014	0.78	C-D	0.984091	D	A,6-13	ELNYGLAQ	33.08	7.777	13.616		postGMF-runs\1client\WT_analysis\more_scans\ZMYM3\ZMYM3_1105-1120_output	1client	WT	unknown	ACSAAELNYGLAQFVR	rank_008	0.82	B-C	0.990417	B	A,1-8	ACSAAELN	25.118	12.75	16.246
postGMF-runs\2client\WT_analysis\more_scans\ZMYM3\ZMYM3_1105-1120_output	2client	WT	unknown	ACSAAELNYGLAQFVR	rank_011	0.78	C-D	0.984545	D	A,5-12	AELNYGLA	32.926	7.817	13.629		postGMF-runs\1client\WT_analysis\more_scans\ZMYM3\ZMYM3_1105-1120_output	1client	WT	unknown	ACSAAELNYGLAQFVR	rank_022	0.8	B-C	1.15182	C	A,3-10	SAAELNYG	22.266	13.354	17.105
postGMF-runs\2client\WT_analysis\more_scans\ZMYM3\ZMYM3_1105-1120_output	2client	WT	unknown	ACSAAELNYGLAQFVR	rank_011	0.78	C-D	0.984545	C	B,5-12	AELNYGLA	32.631	7.914	13.64		postGMF-runs\1client\WT_analysis\more_scans\ZMYM3\ZMYM3_1105-1120_output	1client	WT	unknown	ACSAAELNYGLAQFVR	rank_022	0.8	B-C	1.15182	C	A,3-10	SAAELNYG	22.266	13.354	17.105
postGMF-runs\2client\WT_analysis\more_scans\MARK3\MARK3_481-496_output	2client	WT	unknown	ADIPERKKSSTVPSSN	rank_003	0.85	C-D	0.995	D	B,6-13	RKKSSTVP	78.407	3.395	6.323		postGMF-runs\1client\WT_analysis\more_scans\MARK3\MARK3_481-496_output	1client	WT	unknown	ADIPERKKSSTVPSSN	rank_002	0.86	B-C	0.964545	B	A,6-13	RKKSSTVP	68.544	5.818	8.493
postGMF-runs\2client\WT_analysis\more_scans\MARK3\MARK3_481-496_output	2client	WT	unknown	ADIPERKKSSTVPSSN	rank_003	0.85	C-D	0.995	C	A,6-13	RKKSSTVP	77.335	3.571	6.62		postGMF-runs\1client\WT_analysis\more_scans\MARK3\MARK3_481-496_output	1client	WT	unknown	ADIPERKKSSTVPSSN	rank_002	0.86	B-C	0.964545	B	A,6-13	RKKSSTVP	68.544	5.818	8.493
postGMF-runs\2client\WT_analysis\more_scans\MARK3\MARK3_481-496_output	2client	WT	unknown	ADIPERKKSSTVPSSN	rank_001	0.85	C-D	0.952273	D	B,5-12	ERKKSSTV	76.924	3.416	7.616		postGMF-runs\1client\WT_analysis\more_scans\MARK3\MARK3_481-496_output	1client	WT	unknown	ADIPERKKSSTVPSSN	rank_001	0.86	B-C	0.970833	C	A,6-13	RKKSSTVP	67.474	6.044	8.642
postGMF-runs\2client\WT_analysis\more_scans\MARK3\MARK3_481-496_output	2client	WT	unknown	ADIPERKKSSTVPSSN	rank_001	0.85	C-D	0.952273	C	A,5-12	ERKKSSTV	75.091	3.674	8.027		postGMF-runs\1client\WT_analysis\more_scans\MARK3\MARK3_481-496_output	1client	WT	unknown	ADIPERKKSSTVPSSN	rank_001	0.86	B-C	0.970833	C	A,6-13	RKKSSTVP	67.474	6.044	8.642
postGMF-runs\2client\WT_analysis\more_scans\MARK3\MARK3_481-496_output	2client	WT	unknown	ADIPERKKSSTVPSSN	rank_004	0.85	C-D	0.97875	D	B,6-13	RKKSSTVP	76.869	3.552	6.773		postGMF-runs\1client\WT_analysis\more_scans\MARK3\MARK3_481-496_output	1client	WT	unknown	ADIPERKKSSTVPSSN	rank_003	0.86	B-C	0.969583	B	A,6-13	RKKSSTVP	61.634	6.876	9.395
postGMF-runs\2client\WT_analysis\more_scans\MARK3\MARK3_481-496_output	2client	WT	unknown	ADIPERKKSSTVPSSN	rank_004	0.85	C-D	0.97875	C	A,6-13	RKKSSTVP	75.844	3.72	6.985		postGMF-runs\1client\WT_analysis\more_scans\MARK3\MARK3_481-496_output	1client	WT	unknown	ADIPERKKSSTVPSSN	rank_003	0.86	B-C	0.969583	B	A,6-13	RKKSSTVP	61.634	6.876	9.395
postGMF-runs\2client\WT_analysis\more_scans\MARK3\MARK3_481-496_output	2client	WT	unknown	ADIPERKKSSTVPSSN	rank_005	0.84	C-D	0.970417	D	A,6-13	RKKSSTVP	76.408	3.798	7.03		postGMF-runs\1client\WT_analysis\more_scans\MARK3\MARK3_481-496_output	1client	WT	unknown	ADIPERKKSSTVPSSN	rank_004	0.85	B-C	0.969167	B	A,5-12	ERKKSSTV	57.796	7.614	10.564
postGMF-runs\2client\WT_analysis\more_scans\MARK3\MARK3_481-496_output	2client	WT	unknown	ADIPERKKSSTVPSSN	rank_005	0.84	C-D	0.970417	C	B,6-13	RKKSSTVP	75.461	3.939	7.192		postGMF-runs\1client\WT_analysis\more_scans\MARK3\MARK3_481-496_output	1client	WT	unknown	ADIPERKKSSTVPSSN	rank_004	0.85	B-C	0.969167	B	A,5-12	ERKKSSTV	57.796	7.614	10.564
postGMF-runs\2client\WT_analysis\more_scans\MARK3\MARK3_481-496_output	2client	WT	unknown	ADIPERKKSSTVPSSN	rank_002	0.85	C-D	0.996818	C	B,5-12	ERKKSSTV	76.305	3.515	7.064		postGMF-runs\1client\WT_analysis\more_scans\MARK3\MARK3_481-496_output	1client	WT	unknown	ADIPERKKSSTVPSSN	rank_005	0.84	B-C	0.997692	C	A,5-12	ERKKSSTV	50.062	9.222	11.04
postGMF-runs\2client\WT_analysis\more_scans\MARK3\MARK3_481-496_output	2client	WT	unknown	ADIPERKKSSTVPSSN	rank_002	0.85	C-D	0.996818	D	A,5-12	ERKKSSTV	76.255	3.506	7.033		postGMF-runs\1client\WT_analysis\more_scans\MARK3\MARK3_481-496_output	1client	WT	unknown	ADIPERKKSSTVPSSN	rank_005	0.84	B-C	0.997692	C	A,5-12	ERKKSSTV	50.062	9.222	11.04
postGMF-runs\2client\WT_analysis\more_scans\MARK3\MARK3_481-496_output	2client	WT	unknown	ADIPERKKSSTVPSSN	rank_007	0.84	C-D	0.984167	C	A,6-13	RKKSSTVP	74.93	4.057	7.265		postGMF-runs\1client\WT_analysis\more_scans\MARK3\MARK3_481-496_output	1client	WT	unknown	ADIPERKKSSTVPSSN	rank_006	0.83	B-C	0.958636	C	A,6-13	RKKSSTVP	40.978	10.338	12.564
postGMF-runs\2client\WT_analysis\more_scans\MARK3\MARK3_481-496_output	2client	WT	unknown	ADIPERKKSSTVPSSN	rank_007	0.84	C-D	0.984167	D	B,6-13	RKKSSTVP	74.344	4.201	7.354		postGMF-runs\1client\WT_analysis\more_scans\MARK3\MARK3_481-496_output	1client	WT	unknown	ADIPERKKSSTVPSSN	rank_006	0.83	B-C	0.958636	C	A,6-13	RKKSSTVP	40.978	10.338	12.564
postGMF-runs\2client\WT_analysis\more_scans\MARK3\MARK3_481-496_output	2client	WT	unknown	ADIPERKKSSTVPSSN	rank_008	0.84	C-D	1.00958	C	A,6-13	RKKSSTVP	74.749	4.019	7.139		postGMF-runs\1client\WT_analysis\more_scans\MARK3\MARK3_481-496_output	1client	WT	unknown	ADIPERKKSSTVPSSN	rank_019	0.82	B-C	0.981667	C	A,5-12	ERKKSSTV	40.113	10.841	13.562
postGMF-runs\2client\WT_analysis\more_scans\MARK3\MARK3_481-496_output	2client	WT	unknown	ADIPERKKSSTVPSSN	rank_008	0.84	C-D	1.00958	D	B,6-13	RKKSSTVP	74.116	4.099	7.212		postGMF-runs\1client\WT_analysis\more_scans\MARK3\MARK3_481-496_output	1client	WT	unknown	ADIPERKKSSTVPSSN	rank_019	0.82	B-C	0.981667	C	A,5-12	ERKKSSTV	40.113	10.841	13.562
postGMF-runs\2client\WT_analysis\more_scans\MARK3\MARK3_481-496_output	2client	WT	unknown	ADIPERKKSSTVPSSN	rank_006	0.84	C-D	0.960909	C	A,5-12	ERKKSSTV	73.994	3.8	8.193		postGMF-runs\1client\WT_analysis\more_scans\MARK3\MARK3_481-496_output	1client	WT	unknown	ADIPERKKSSTVPSSN	rank_009	0.82	B-C	0.989583	C	A,5-12	ERKKSSTV	38.079	10.756	13.211
postGMF-runs\2client\WT_analysis\more_scans\MARK3\MARK3_481-496_output	2client	WT	unknown	ADIPERKKSSTVPSSN	rank_006	0.84	C-D	0.960909	D	B,5-12	ERKKSSTV	71.471	4.157	8.731		postGMF-runs\1client\WT_analysis\more_scans\MARK3\MARK3_481-496_output	1client	WT	unknown	ADIPERKKSSTVPSSN	rank_009	0.82	B-C	0.989583	C	A,5-12	ERKKSSTV	38.079	10.756	13.211
postGMF-runs\2client\WT_analysis\more_scans\MARK3\MARK3_481-496_output	2client	WT	unknown	ADIPERKKSSTVPSSN	rank_009	0.83	C-D	0.9955	D	A,6-13	RKKSSTVP	73.024	4.37	7.732		postGMF-runs\1client\WT_analysis\more_scans\MARK3\MARK3_481-496_output	1client	WT	unknown	ADIPERKKSSTVPSSN	rank_021	0.82	B-C	0.976154	C	A,5-12	ERKKSSTV	37.37	11.307	13.836
postGMF-runs\2client\WT_analysis\more_scans\MARK3\MARK3_481-496_output	2client	WT	unknown	ADIPERKKSSTVPSSN	rank_009	0.83	C-D	0.9955	C	B,6-13	RKKSSTVP	71.93	4.53	7.873		postGMF-runs\1client\WT_analysis\more_scans\MARK3\MARK3_481-496_output	1client	WT	unknown	ADIPERKKSSTVPSSN	rank_021	0.82	B-C	0.976154	C	A,5-12	ERKKSSTV	37.37	11.307	13.836
postGMF-runs\2client\WT_analysis\more_scans\MARK3\MARK3_481-496_output	2client	WT	unknown	ADIPERKKSSTVPSSN	rank_012	0.82	C-D	0.987	C	A,6-13	RKKSSTVP	69.551	5.158	8.477		postGMF-runs\1client\WT_analysis\more_scans\MARK3\MARK3_481-496_output	1client	WT	unknown	ADIPERKKSSTVPSSN	rank_011	0.82	B-C	0.998182	B	A,5-12	ERKKSSTV	36.958	10.286	12.103
postGMF-runs\2client\WT_analysis\more_scans\MARK3\MARK3_481-496_output	2client	WT	unknown	ADIPERKKSSTVPSSN	rank_012	0.82	C-D	0.987	D	B,6-13	RKKSSTVP	68.86	5.317	8.605		postGMF-runs\1client\WT_analysis\more_scans\MARK3\MARK3_481-496_output	1client	WT	unknown	ADIPERKKSSTVPSSN	rank_011	0.82	B-C	0.998182	B	A,5-12	ERKKSSTV	36.958	10.286	12.103
postGMF-runs\2client\WT_analysis\more_scans\MARK3\MARK3_481-496_output	2client	WT	unknown	ADIPERKKSSTVPSSN	rank_011	0.82	C-D	1.12364	C	B,6-13	RKKSSTVP	69.154	4.09	7.829		postGMF-runs\1client\WT_analysis\more_scans\MARK3\MARK3_481-496_output	1client	WT	unknown	ADIPERKKSSTVPSSN	rank_014	0.82	B-C	0.974583	B	A,5-12	ERKKSSTV	36.56	10.362	13.567
postGMF-runs\2client\WT_analysis\more_scans\MARK3\MARK3_481-496_output	2client	WT	unknown	ADIPERKKSSTVPSSN	rank_011	0.82	C-D	1.12364	D	A,6-13	RKKSSTVP	68.812	4.183	7.92		postGMF-runs\1client\WT_analysis\more_scans\MARK3\MARK3_481-496_output	1client	WT	unknown	ADIPERKKSSTVPSSN	rank_014	0.82	B-C	0.974583	B	A,5-12	ERKKSSTV	36.56	10.362	13.567
postGMF-runs\2client\WT_analysis\more_scans\MARK3\MARK3_481-496_output	2client	WT	unknown	ADIPERKKSSTVPSSN	rank_013	0.82	C-D	0.9835	C	A,6-13	RKKSSTVP	68.016	5.015	8.452		postGMF-runs\1client\WT_analysis\more_scans\MARK3\MARK3_481-496_output	1client	WT	unknown	ADIPERKKSSTVPSSN	rank_007	0.83	B-C	0.970909	B	A,5-12	ERKKSSTV	35.783	9.322	13.427
postGMF-runs\2client\WT_analysis\more_scans\MARK3\MARK3_481-496_output	2client	WT	unknown	ADIPERKKSSTVPSSN	rank_013	0.82	C-D	0.9835	D	B,7-14	KKSSTVPS	62.984	5.348	8.687		postGMF-runs\1client\WT_analysis\more_scans\MARK3\MARK3_481-496_output	1client	WT	unknown	ADIPERKKSSTVPSSN	rank_007	0.83	B-C	0.970909	B	A,5-12	ERKKSSTV	35.783	9.322	13.427
postGMF-runs\2client\WT_analysis\more_scans\MARK3\MARK3_481-496_output	2client	WT	unknown	ADIPERKKSSTVPSSN	rank_010	0.82	C-D	0.995	C	A,6-13	RKKSSTVP	67.984	5.302	8.765		postGMF-runs\1client\WT_analysis\more_scans\MARK3\MARK3_481-496_output	1client	WT	unknown	ADIPERKKSSTVPSSN	rank_010	0.82	B-C	0.985909	C	A,5-12	ERKKSSTV	35.529	10.311	12.569
postGMF-runs\2client\WT_analysis\more_scans\MARK3\MARK3_481-496_output	2client	WT	unknown	ADIPERKKSSTVPSSN	rank_010	0.82	C-D	0.995	D	B,6-13	RKKSSTVP	67.582	5.351	8.818		postGMF-runs\1client\WT_analysis\more_scans\MARK3\MARK3_481-496_output	1client	WT	unknown	ADIPERKKSSTVPSSN	rank_010	0.82	B-C	0.985909	C	A,5-12	ERKKSSTV	35.529	10.311	12.569
postGMF-runs\2client\WT_analysis\more_scans\MARK3\MARK3_481-496_output	2client	WT	unknown	ADIPERKKSSTVPSSN	rank_015	0.81	C-D	0.979	D	A,6-13	RKKSSTVP	66.992	5.602	8.999		postGMF-runs\1client\WT_analysis\more_scans\MARK3\MARK3_481-496_output	1client	WT	unknown	ADIPERKKSSTVPSSN	rank_012	0.82	B-C	0.976364	B	A,5-12	ERKKSSTV	33.88	9.782	13.723
postGMF-runs\2client\WT_analysis\more_scans\MARK3\MARK3_481-496_output	2client	WT	unknown	ADIPERKKSSTVPSSN	rank_015	0.81	C-D	0.979	C	B,6-13	RKKSSTVP	65.559	5.705	9.139		postGMF-runs\1client\WT_analysis\more_scans\MARK3\MARK3_481-496_output	1client	WT	unknown	ADIPERKKSSTVPSSN	rank_012	0.82	B-C	0.976364	B	A,5-12	ERKKSSTV	33.88	9.782	13.723
postGMF-runs\2client\WT_analysis\more_scans\MARK3\MARK3_481-496_output	2client	WT	unknown	ADIPERKKSSTVPSSN	rank_017	0.81	C-D	0.963077	D	B,5-12	ERKKSSTV	66.223	5.965	10.347		postGMF-runs\1client\WT_analysis\more_scans\MARK3\MARK3_481-496_output	1client	WT	unknown	ADIPERKKSSTVPSSN	rank_025	0.81	B-C	1.00625	C	A,5-12	ERKKSSTV	33.732	11.28	12.994
postGMF-runs\2client\WT_analysis\more_scans\MARK3\MARK3_481-496_output	2client	WT	unknown	ADIPERKKSSTVPSSN	rank_017	0.81	C-D	0.963077	C	A,5-12	ERKKSSTV	65.976	5.95	10.271		postGMF-runs\1client\WT_analysis\more_scans\MARK3\MARK3_481-496_output	1client	WT	unknown	ADIPERKKSSTVPSSN	rank_025	0.81	B-C	1.00625	C	A,5-12	ERKKSSTV	33.732	11.28	12.994
postGMF-runs\2client\WT_analysis\more_scans\MARK3\MARK3_481-496_output	2client	WT	unknown	ADIPERKKSSTVPSSN	rank_016	0.81	C-D	1.12864	D	B,6-13	RKKSSTVP	62.316	4.585	8.809		postGMF-runs\1client\WT_analysis\more_scans\MARK3\MARK3_481-496_output	1client	WT	unknown	ADIPERKKSSTVPSSN	rank_008	0.82	B-C	0.947273	C	A,5-12	ERKKSSTV	33.381	9.505	13.697
postGMF-runs\2client\WT_analysis\more_scans\MARK3\MARK3_481-496_output	2client	WT	unknown	ADIPERKKSSTVPSSN	rank_016	0.81	C-D	1.12864	C	A,6-13	RKKSSTVP	62.15	4.622	8.793		postGMF-runs\1client\WT_analysis\more_scans\MARK3\MARK3_481-496_output	1client	WT	unknown	ADIPERKKSSTVPSSN	rank_008	0.82	B-C	0.947273	C	A,5-12	ERKKSSTV	33.381	9.505	13.697
postGMF-runs\2client\WT_analysis\more_scans\MARK3\MARK3_481-496_output	2client	WT	unknown	ADIPERKKSSTVPSSN	rank_014	0.82	C-D	0.972273	C	A,6-13	RKKSSTVP	61.769	5.128	10.006		postGMF-runs\1client\WT_analysis\more_scans\MARK3\MARK3_481-496_output	1client	WT	unknown	ADIPERKKSSTVPSSN	rank_023	0.82	B-C	1.04045	B	A,5-12	ERKKSSTV	33.321	10.219	12.635
postGMF-runs\2client\WT_analysis\more_scans\MARK3\MARK3_481-496_output	2client	WT	unknown	ADIPERKKSSTVPSSN	rank_014	0.82	C-D	0.972273	D	B,6-13	RKKSSTVP	61.425	5.148	10.085		postGMF-runs\1client\WT_analysis\more_scans\MARK3\MARK3_481-496_output	1client	WT	unknown	ADIPERKKSSTVPSSN	rank_023	0.82	B-C	1.04045	B	A,5-12	ERKKSSTV	33.321	10.219	12.635
postGMF-runs\2client\WT_analysis\more_scans\MARK3\MARK3_481-496_output	2client	WT	unknown	ADIPERKKSSTVPSSN	rank_019	0.79	C-D	0.955769	C	A,5-12	ERKKSSTV	59.775	6.484	10.981		postGMF-runs\1client\WT_analysis\more_scans\MARK3\MARK3_481-496_output	1client	WT	unknown	ADIPERKKSSTVPSSN	rank_022	0.82	B-C	1.01364	B	A,5-12	ERKKSSTV	31.996	10.799	13.1
postGMF-runs\2client\WT_analysis\more_scans\MARK3\MARK3_481-496_output	2client	WT	unknown	ADIPERKKSSTVPSSN	rank_019	0.79	C-D	0.955769	D	B,5-12	ERKKSSTV	57.981	6.58	11.098		postGMF-runs\1client\WT_analysis\more_scans\MARK3\MARK3_481-496_output	1client	WT	unknown	ADIPERKKSSTVPSSN	rank_022	0.82	B-C	1.01364	B	A,5-12	ERKKSSTV	31.996	10.799	13.1
postGMF-runs\2client\WT_analysis\more_scans\MARK3\MARK3_481-496_output	2client	WT	unknown	ADIPERKKSSTVPSSN	rank_021	0.79	C-D	0.98	C	B,6-13	RKKSSTVP	49.764	7.31	11.253		postGMF-runs\1client\WT_analysis\more_scans\MARK3\MARK3_481-496_output	1client	WT	unknown	ADIPERKKSSTVPSSN	rank_015	0.82	B-C	0.981364	C	A,5-12	ERKKSSTV	31.594	9.96	13.964
postGMF-runs\2client\WT_analysis\more_scans\MARK3\MARK3_481-496_output	2client	WT	unknown	ADIPERKKSSTVPSSN	rank_021	0.79	C-D	0.98	D	A,6-13	RKKSSTVP	48.555	7.517	11.47		postGMF-runs\1client\WT_analysis\more_scans\MARK3\MARK3_481-496_output	1client	WT	unknown	ADIPERKKSSTVPSSN	rank_015	0.82	B-C	0.981364	C	A,5-12	ERKKSSTV	31.594	9.96	13.964
postGMF-runs\2client\WT_analysis\more_scans\MARK3\MARK3_481-496_output	2client	WT	unknown	ADIPERKKSSTVPSSN	rank_018	0.8	C-D	0.98	C	B,5-12	ERKKSSTV	48.649	5.842	11.269		postGMF-runs\1client\WT_analysis\more_scans\MARK3\MARK3_481-496_output	1client	WT	unknown	ADIPERKKSSTVPSSN	rank_016	0.82	B-C	1.03136	B	A,5-12	ERKKSSTV	31.37	10.849	14.3
postGMF-runs\2client\WT_analysis\more_scans\MARK3\MARK3_481-496_output	2client	WT	unknown	ADIPERKKSSTVPSSN	rank_018	0.8	C-D	0.98	D	A,6-13	RKKSSTVP	47.716	6.018	11.265		postGMF-runs\1client\WT_analysis\more_scans\MARK3\MARK3_481-496_output	1client	WT	unknown	ADIPERKKSSTVPSSN	rank_016	0.82	B-C	1.03136	B	A,5-12	ERKKSSTV	31.37	10.849	14.3
postGMF-runs\2client\WT_analysis\more_scans\MARK3\MARK3_481-496_output	2client	WT	unknown	ADIPERKKSSTVPSSN	rank_022	0.78	C-D	0.965833	D	A,6-13	RKKSSTVP	46.926	7.78	12.004		postGMF-runs\1client\WT_analysis\more_scans\MARK3\MARK3_481-496_output	1client	WT	unknown	ADIPERKKSSTVPSSN	rank_013	0.82	B-C	0.9825	C	A,5-12	ERKKSSTV	30.514	10.848	13.318
postGMF-runs\2client\WT_analysis\more_scans\MARK3\MARK3_481-496_output	2client	WT	unknown	ADIPERKKSSTVPSSN	rank_022	0.78	C-D	0.965833	C	B,6-13	RKKSSTVP	45.83	7.73	12.025		postGMF-runs\1client\WT_analysis\more_scans\MARK3\MARK3_481-496_output	1client	WT	unknown	ADIPERKKSSTVPSSN	rank_013	0.82	B-C	0.9825	C	A,5-12	ERKKSSTV	30.514	10.848	13.318
postGMF-runs\2client\WT_analysis\more_scans\MARK3\MARK3_481-496_output	2client	WT	unknown	ADIPERKKSSTVPSSN	rank_023	0.78	C-D	1.05818	D	A,6-13	RKKSSTVP	44.999	6.288	10.54		postGMF-runs\1client\WT_analysis\more_scans\MARK3\MARK3_481-496_output	1client	WT	unknown	ADIPERKKSSTVPSSN	rank_018	0.82	B-C	0.976364	C	A,5-12	ERKKSSTV	30.356	11.146	13.421
postGMF-runs\2client\WT_analysis\more_scans\MARK3\MARK3_481-496_output	2client	WT	unknown	ADIPERKKSSTVPSSN	rank_023	0.78	C-D	1.05818	C	B,6-13	RKKSSTVP	41.305	6.527	11.232		postGMF-runs\1client\WT_analysis\more_scans\MARK3\MARK3_481-496_output	1client	WT	unknown	ADIPERKKSSTVPSSN	rank_018	0.82	B-C	0.976364	C	A,5-12	ERKKSSTV	30.356	11.146	13.421
postGMF-runs\2client\WT_analysis\more_scans\MARK3\MARK3_481-496_output	2client	WT	unknown	ADIPERKKSSTVPSSN	rank_025	0.78	C-D	0.97125	D	A,6-13	RKKSSTVP	43.078	7.955	12.077		postGMF-runs\1client\WT_analysis\more_scans\MARK3\MARK3_481-496_output	1client	WT	unknown	ADIPERKKSSTVPSSN	rank_020	0.82	B-C	0.988182	C	A,5-12	ERKKSSTV	29.274	11.218	13.676
postGMF-runs\2client\WT_analysis\more_scans\MARK3\MARK3_481-496_output	2client	WT	unknown	ADIPERKKSSTVPSSN	rank_025	0.78	C-D	0.97125	C	B,6-13	RKKSSTVP	41.804	8.378	12.376		postGMF-runs\1client\WT_analysis\more_scans\MARK3\MARK3_481-496_output	1client	WT	unknown	ADIPERKKSSTVPSSN	rank_020	0.82	B-C	0.988182	C	A,5-12	ERKKSSTV	29.274	11.218	13.676
postGMF-runs\2client\WT_analysis\more_scans\MARK3\MARK3_481-496_output	2client	WT	unknown	ADIPERKKSSTVPSSN	rank_020	0.79	C-D	0.956364	C	A,6-13	RKKSSTVP	41.579	6.691	11.926		postGMF-runs\1client\WT_analysis\more_scans\MARK3\MARK3_481-496_output	1client	WT	unknown	ADIPERKKSSTVPSSN	rank_017	0.82	B-C	0.974091	C	A,5-12	ERKKSSTV	28.428	11.068	13.796
postGMF-runs\2client\WT_analysis\more_scans\MARK3\MARK3_481-496_output	2client	WT	unknown	ADIPERKKSSTVPSSN	rank_020	0.79	C-D	0.956364	D	B,7-14	KKSSTVPS	41.524	6.768	11.817		postGMF-runs\1client\WT_analysis\more_scans\MARK3\MARK3_481-496_output	1client	WT	unknown	ADIPERKKSSTVPSSN	rank_017	0.82	B-C	0.974091	C	A,5-12	ERKKSSTV	28.428	11.068	13.796
postGMF-runs\2client\WT_analysis\more_scans\MARK3\MARK3_481-496_output	2client	WT	unknown	ADIPERKKSSTVPSSN	rank_024	0.78	C-D	1.06	C	B,7-14	KKSSTVPS	41.171	6.552	11.21		postGMF-runs\1client\WT_analysis\more_scans\MARK3\MARK3_481-496_output	1client	WT	unknown	ADIPERKKSSTVPSSN	rank_024	0.81	B-C	0.987727	C	A,5-12	ERKKSSTV	28.425	11.42	13.821
postGMF-runs\2client\WT_analysis\more_scans\MARK3\MARK3_481-496_output	2client	WT	unknown	ADIPERKKSSTVPSSN	rank_024	0.78	C-D	1.06	D	A,7-14	KKSSTVPS	40.128	6.592	11.395		postGMF-runs\1client\WT_analysis\more_scans\MARK3\MARK3_481-496_output	1client	WT	unknown	ADIPERKKSSTVPSSN	rank_024	0.81	B-C	0.987727	C	A,5-12	ERKKSSTV	28.425	11.42	13.821
postGMF-runs\2client\WT_analysis\more_scans\WWC3\WWC3_609-624_output	2client	WT	unknown	ADSCEGPGLGALDRLR	rank_011	0.75	C-D	1.42321	C	A,1-8	ADSCEGPG	46.906	5.682	10.881		postGMF-runs\1client\WT_analysis\more_scans\WWC3\WWC3_609-624_output	1client	WT	unknown	ADSCEGPGLGALDRLR	rank_020	0.76	B-C	1.455	B	A,3-10	SCEGPGLG	36.134	8.899	14.19
postGMF-runs\2client\WT_analysis\more_scans\WWC3\WWC3_609-624_output	2client	WT	unknown	ADSCEGPGLGALDRLR	rank_011	0.75	C-D	1.42321	D	B,1-8	ADSCEGPG	45.984	5.757	10.986		postGMF-runs\1client\WT_analysis\more_scans\WWC3\WWC3_609-624_output	1client	WT	unknown	ADSCEGPGLGALDRLR	rank_020	0.76	B-C	1.455	B	A,3-10	SCEGPGLG	36.134	8.899	14.19
postGMF-runs\2client\WT_analysis\more_scans\WWC3\WWC3_609-624_output	2client	WT	unknown	ADSCEGPGLGALDRLR	rank_014	0.75	C-D	1.46333	C	B,2-9	DSCEGPGL	44.124	5.855	11.822		postGMF-runs\1client\WT_analysis\more_scans\WWC3\WWC3_609-624_output	1client	WT	unknown	ADSCEGPGLGALDRLR	rank_021	0.75	B-C	1.46429	B	A,5-12	EGPGLGAL	33.476	9.869	14.446
postGMF-runs\2client\WT_analysis\more_scans\WWC3\WWC3_609-624_output	2client	WT	unknown	ADSCEGPGLGALDRLR	rank_014	0.75	C-D	1.46333	D	A,1-8	ADSCEGPG	43.424	5.845	11.431		postGMF-runs\1client\WT_analysis\more_scans\WWC3\WWC3_609-624_output	1client	WT	unknown	ADSCEGPGLGALDRLR	rank_021	0.75	B-C	1.46429	B	A,5-12	EGPGLGAL	33.476	9.869	14.446
postGMF-runs\2client\WT_analysis\more_scans\WWC3\WWC3_609-624_output	2client	WT	unknown	ADSCEGPGLGALDRLR	rank_006	0.76	C-D	1.32455	D	B,3-10	SCEGPGLG	43.499	6.614	12.192		postGMF-runs\1client\WT_analysis\more_scans\WWC3\WWC3_609-624_output	1client	WT	unknown	ADSCEGPGLGALDRLR	rank_018	0.76	B-C	1.43	B	A,6-13	GPGLGALD	33.369	10.115	14.778
postGMF-runs\2client\WT_analysis\more_scans\WWC3\WWC3_609-624_output	2client	WT	unknown	ADSCEGPGLGALDRLR	rank_006	0.76	C-D	1.32455	C	A,3-10	SCEGPGLG	42.875	6.687	12.28		postGMF-runs\1client\WT_analysis\more_scans\WWC3\WWC3_609-624_output	1client	WT	unknown	ADSCEGPGLGALDRLR	rank_018	0.76	B-C	1.43	B	A,6-13	GPGLGALD	33.369	10.115	14.778
postGMF-runs\2client\WT_analysis\more_scans\WWC3\WWC3_609-624_output	2client	WT	unknown	ADSCEGPGLGALDRLR	rank_012	0.75	C-D	1.36208	C	A,4-11	CEGPGLGA	41.675	6.785	12.516		postGMF-runs\1client\WT_analysis\more_scans\WWC3\WWC3_609-624_output	1client	WT	unknown	ADSCEGPGLGALDRLR	rank_011	0.78	B-C	1.295	B	A,2-9	DSCEGPGL	33.12	9.469	14.074
postGMF-runs\2client\WT_analysis\more_scans\WWC3\WWC3_609-624_output	2client	WT	unknown	ADSCEGPGLGALDRLR	rank_012	0.75	C-D	1.36208	D	B,4-11	CEGPGLGA	41.235	6.817	12.617		postGMF-runs\1client\WT_analysis\more_scans\WWC3\WWC3_609-624_output	1client	WT	unknown	ADSCEGPGLGALDRLR	rank_011	0.78	B-C	1.295	B	A,2-9	DSCEGPGL	33.12	9.469	14.074
postGMF-runs\2client\WT_analysis\more_scans\WWC3\WWC3_609-624_output	2client	WT	unknown	ADSCEGPGLGALDRLR	rank_009	0.75	C-D	1.28292	C	A,4-11	CEGPGLGA	41.437	6.888	12.792		postGMF-runs\1client\WT_analysis\more_scans\WWC3\WWC3_609-624_output	1client	WT	unknown	ADSCEGPGLGALDRLR	rank_013	0.78	B-C	1.32577	C	A,6-13	GPGLGALD	32.659	9.943	15.02
postGMF-runs\2client\WT_analysis\more_scans\WWC3\WWC3_609-624_output	2client	WT	unknown	ADSCEGPGLGALDRLR	rank_009	0.75	C-D	1.28292	D	B,4-11	CEGPGLGA	40.854	6.944	12.856		postGMF-runs\1client\WT_analysis\more_scans\WWC3\WWC3_609-624_output	1client	WT	unknown	ADSCEGPGLGALDRLR	rank_013	0.78	B-C	1.32577	C	A,6-13	GPGLGALD	32.659	9.943	15.02
postGMF-runs\2client\WT_analysis\more_scans\WWC3\WWC3_609-624_output	2client	WT	unknown	ADSCEGPGLGALDRLR	rank_017	0.74	C-D	1.44321	C	A,5-12	EGPGLGAL	41.272	6.67	12.767		postGMF-runs\1client\WT_analysis\more_scans\WWC3\WWC3_609-624_output	1client	WT	unknown	ADSCEGPGLGALDRLR	rank_017	0.77	B-C	1.35286	C	A,5-12	EGPGLGAL	32.201	9.814	14.935
postGMF-runs\2client\WT_analysis\more_scans\WWC3\WWC3_609-624_output	2client	WT	unknown	ADSCEGPGLGALDRLR	rank_017	0.74	C-D	1.44321	D	B,5-12	EGPGLGAL	41.141	6.655	12.749		postGMF-runs\1client\WT_analysis\more_scans\WWC3\WWC3_609-624_output	1client	WT	unknown	ADSCEGPGLGALDRLR	rank_017	0.77	B-C	1.35286	C	A,5-12	EGPGLGAL	32.201	9.814	14.935
postGMF-runs\2client\WT_analysis\more_scans\WWC3\WWC3_609-624_output	2client	WT	unknown	ADSCEGPGLGALDRLR	rank_010	0.75	C-D	1.28393	D	B,4-11	CEGPGLGA	40.044	7.035	12.732		postGMF-runs\1client\WT_analysis\more_scans\WWC3\WWC3_609-624_output	1client	WT	unknown	ADSCEGPGLGALDRLR	rank_023	0.75	B-C	1.48607	B	A,4-11	CEGPGLGA	32.04	10.253	15.517
postGMF-runs\2client\WT_analysis\more_scans\WWC3\WWC3_609-624_output	2client	WT	unknown	ADSCEGPGLGALDRLR	rank_010	0.75	C-D	1.28393	C	A,4-11	CEGPGLGA	39.676	7.132	12.768		postGMF-runs\1client\WT_analysis\more_scans\WWC3\WWC3_609-624_output	1client	WT	unknown	ADSCEGPGLGALDRLR	rank_023	0.75	B-C	1.48607	B	A,4-11	CEGPGLGA	32.04	10.253	15.517
postGMF-runs\2client\WT_analysis\more_scans\WWC3\WWC3_609-624_output	2client	WT	unknown	ADSCEGPGLGALDRLR	rank_002	0.78	C-D	1.03308	D	A,4-11	CEGPGLGA	39.857	7.036	12.688		postGMF-runs\1client\WT_analysis\more_scans\WWC3\WWC3_609-624_output	1client	WT	unknown	ADSCEGPGLGALDRLR	rank_024	0.75	B-C	1.49429	B	A,5-12	EGPGLGAL	31.806	10.237	15.412
postGMF-runs\2client\WT_analysis\more_scans\WWC3\WWC3_609-624_output	2client	WT	unknown	ADSCEGPGLGALDRLR	rank_002	0.78	C-D	1.03308	C	B,4-11	CEGPGLGA	39.335	7.122	12.75		postGMF-runs\1client\WT_analysis\more_scans\WWC3\WWC3_609-624_output	1client	WT	unknown	ADSCEGPGLGALDRLR	rank_024	0.75	B-C	1.49429	B	A,5-12	EGPGLGAL	31.806	10.237	15.412
postGMF-runs\2client\WT_analysis\more_scans\WWC3\WWC3_609-624_output	2client	WT	unknown	ADSCEGPGLGALDRLR	rank_007	0.75	C-D	1.30292	D	B,3-10	SCEGPGLG	39.6	6.607	11.908		postGMF-runs\1client\WT_analysis\more_scans\WWC3\WWC3_609-624_output	1client	WT	unknown	ADSCEGPGLGALDRLR	rank_016	0.77	B-C	1.34375	B	A,5-12	EGPGLGAL	31.759	10.648	16.3
postGMF-runs\2client\WT_analysis\more_scans\WWC3\WWC3_609-624_output	2client	WT	unknown	ADSCEGPGLGALDRLR	rank_007	0.75	C-D	1.30292	C	A,3-10	SCEGPGLG	39.134	6.605	12.074		postGMF-runs\1client\WT_analysis\more_scans\WWC3\WWC3_609-624_output	1client	WT	unknown	ADSCEGPGLGALDRLR	rank_016	0.77	B-C	1.34375	B	A,5-12	EGPGLGAL	31.759	10.648	16.3
postGMF-runs\2client\WT_analysis\more_scans\WWC3\WWC3_609-624_output	2client	WT	unknown	ADSCEGPGLGALDRLR	rank_021	0.73	C-D	1.45286	C	B,5-12	EGPGLGAL	38.809	6.831	13.039		postGMF-runs\1client\WT_analysis\more_scans\WWC3\WWC3_609-624_output	1client	WT	unknown	ADSCEGPGLGALDRLR	rank_008	0.79	B-C	1.1635	B	A,5-12	EGPGLGAL	31.632	11.563	15.36
postGMF-runs\2client\WT_analysis\more_scans\WWC3\WWC3_609-624_output	2client	WT	unknown	ADSCEGPGLGALDRLR	rank_021	0.73	C-D	1.45286	D	A,5-12	EGPGLGAL	38.789	6.786	13.008		postGMF-runs\1client\WT_analysis\more_scans\WWC3\WWC3_609-624_output	1client	WT	unknown	ADSCEGPGLGALDRLR	rank_008	0.79	B-C	1.1635	B	A,5-12	EGPGLGAL	31.632	11.563	15.36
postGMF-runs\2client\WT_analysis\more_scans\WWC3\WWC3_609-624_output	2client	WT	unknown	ADSCEGPGLGALDRLR	rank_019	0.74	C-D	1.34167	C	A,4-11	CEGPGLGA	38.301	7.579	13.166		postGMF-runs\1client\WT_analysis\more_scans\WWC3\WWC3_609-624_output	1client	WT	unknown	ADSCEGPGLGALDRLR	rank_025	0.74	B-C	1.49929	B	A,5-12	EGPGLGAL	31.493	10.432	15.612
postGMF-runs\2client\WT_analysis\more_scans\WWC3\WWC3_609-624_output	2client	WT	unknown	ADSCEGPGLGALDRLR	rank_019	0.74	C-D	1.34167	D	B,4-11	CEGPGLGA	37.981	7.61	13.248		postGMF-runs\1client\WT_analysis\more_scans\WWC3\WWC3_609-624_output	1client	WT	unknown	ADSCEGPGLGALDRLR	rank_025	0.74	B-C	1.49929	B	A,5-12	EGPGLGAL	31.493	10.432	15.612
postGMF-runs\2client\WT_analysis\more_scans\WWC3\WWC3_609-624_output	2client	WT	unknown	ADSCEGPGLGALDRLR	rank_013	0.75	C-D	1.342	C	A,6-13	GPGLGALD	38.211	6.928	13.095		postGMF-runs\1client\WT_analysis\more_scans\WWC3\WWC3_609-624_output	1client	WT	unknown	ADSCEGPGLGALDRLR	rank_019	0.76	B-C	1.39885	C	A,6-13	GPGLGALD	30.973	10.926	15.536
postGMF-runs\2client\WT_analysis\more_scans\WWC3\WWC3_609-624_output	2client	WT	unknown	ADSCEGPGLGALDRLR	rank_013	0.75	C-D	1.342	D	B,6-13	GPGLGALD	38.087	6.979	13.12		postGMF-runs\1client\WT_analysis\more_scans\WWC3\WWC3_609-624_output	1client	WT	unknown	ADSCEGPGLGALDRLR	rank_019	0.76	B-C	1.39885	C	A,6-13	GPGLGALD	30.973	10.926	15.536
postGMF-runs\2client\WT_analysis\more_scans\WWC3\WWC3_609-624_output	2client	WT	unknown	ADSCEGPGLGALDRLR	rank_023	0.73	C-D	1.45179	C	B,5-12	EGPGLGAL	37.587	7.024	13.529		postGMF-runs\1client\WT_analysis\more_scans\WWC3\WWC3_609-624_output	1client	WT	unknown	ADSCEGPGLGALDRLR	rank_015	0.77	B-C	1.31818	C	A,4-11	CEGPGLGA	30.571	10.77	15.803
postGMF-runs\2client\WT_analysis\more_scans\WWC3\WWC3_609-624_output	2client	WT	unknown	ADSCEGPGLGALDRLR	rank_023	0.73	C-D	1.45179	D	A,5-12	EGPGLGAL	37.221	7.109	13.563		postGMF-runs\1client\WT_analysis\more_scans\WWC3\WWC3_609-624_output	1client	WT	unknown	ADSCEGPGLGALDRLR	rank_015	0.77	B-C	1.31818	C	A,4-11	CEGPGLGA	30.571	10.77	15.803
postGMF-runs\2client\WT_analysis\more_scans\WWC3\WWC3_609-624_output	2client	WT	unknown	ADSCEGPGLGALDRLR	rank_015	0.74	C-D	1.35083	D	A,3-10	SCEGPGLG	37.561	6.949	12.233		postGMF-runs\1client\WT_analysis\more_scans\WWC3\WWC3_609-624_output	1client	WT	unknown	ADSCEGPGLGALDRLR	rank_014	0.78	B-C	1.264	C	A,5-12	EGPGLGAL	30.451	12.327	16.505
postGMF-runs\2client\WT_analysis\more_scans\WWC3\WWC3_609-624_output	2client	WT	unknown	ADSCEGPGLGALDRLR	rank_015	0.74	C-D	1.35083	C	B,4-11	CEGPGLGA	37.184	7.062	12.594		postGMF-runs\1client\WT_analysis\more_scans\WWC3\WWC3_609-624_output	1client	WT	unknown	ADSCEGPGLGALDRLR	rank_014	0.78	B-C	1.264	C	A,5-12	EGPGLGAL	30.451	12.327	16.505
postGMF-runs\2client\WT_analysis\more_scans\WWC3\WWC3_609-624_output	2client	WT	unknown	ADSCEGPGLGALDRLR	rank_008	0.76	C-D	1.28033	C	B,6-13	GPGLGALD	37.384	6.438	12.454		postGMF-runs\1client\WT_analysis\more_scans\WWC3\WWC3_609-624_output	1client	WT	unknown	ADSCEGPGLGALDRLR	rank_010	0.78	B-C	1.3495	B	A,5-12	EGPGLGAL	29.73	11.349	15.092
postGMF-runs\2client\WT_analysis\more_scans\WWC3\WWC3_609-624_output	2client	WT	unknown	ADSCEGPGLGALDRLR	rank_008	0.76	C-D	1.28033	D	A,6-13	GPGLGALD	36.787	6.506	12.416		postGMF-runs\1client\WT_analysis\more_scans\WWC3\WWC3_609-624_output	1client	WT	unknown	ADSCEGPGLGALDRLR	rank_010	0.78	B-C	1.3495	B	A,5-12	EGPGLGAL	29.73	11.349	15.092
postGMF-runs\2client\WT_analysis\more_scans\WWC3\WWC3_609-624_output	2client	WT	unknown	ADSCEGPGLGALDRLR	rank_024	0.73	C-D	1.42833	C	B,6-13	GPGLGALD	36.574	7.405	12.687		postGMF-runs\1client\WT_analysis\more_scans\WWC3\WWC3_609-624_output	1client	WT	unknown	ADSCEGPGLGALDRLR	rank_009	0.79	B-C	1.261	C	A,5-12	EGPGLGAL	29.299	11.428	14.845
postGMF-runs\2client\WT_analysis\more_scans\WWC3\WWC3_609-624_output	2client	WT	unknown	ADSCEGPGLGALDRLR	rank_024	0.73	C-D	1.42833	D	A,6-13	GPGLGALD	36.074	7.455	12.754		postGMF-runs\1client\WT_analysis\more_scans\WWC3\WWC3_609-624_output	1client	WT	unknown	ADSCEGPGLGALDRLR	rank_009	0.79	B-C	1.261	C	A,5-12	EGPGLGAL	29.299	11.428	14.845
postGMF-runs\2client\WT_analysis\more_scans\WWC3\WWC3_609-624_output	2client	WT	unknown	ADSCEGPGLGALDRLR	rank_001	0.78	C-D	0.9895	C	A,6-13	GPGLGALD	36.533	7.095	13.13		postGMF-runs\1client\WT_analysis\more_scans\WWC3\WWC3_609-624_output	1client	WT	unknown	ADSCEGPGLGALDRLR	rank_001	0.81	B-C	0.999091	C	A,5-12	EGPGLGAL	29.242	11.017	15.479
postGMF-runs\2client\WT_analysis\more_scans\WWC3\WWC3_609-624_output	2client	WT	unknown	ADSCEGPGLGALDRLR	rank_001	0.78	C-D	0.9895	D	B,6-13	GPGLGALD	35.964	6.944	13.193		postGMF-runs\1client\WT_analysis\more_scans\WWC3\WWC3_609-624_output	1client	WT	unknown	ADSCEGPGLGALDRLR	rank_001	0.81	B-C	0.999091	C	A,5-12	EGPGLGAL	29.242	11.017	15.479
postGMF-runs\2client\WT_analysis\more_scans\WWC3\WWC3_609-624_output	2client	WT	unknown	ADSCEGPGLGALDRLR	rank_018	0.74	C-D	1.38179	C	B,6-13	GPGLGALD	36.529	7.077	13.601		postGMF-runs\1client\WT_analysis\more_scans\WWC3\WWC3_609-624_output	1client	WT	unknown	ADSCEGPGLGALDRLR	rank_022	0.75	B-C	1.42708	B	A,4-11	CEGPGLGA	28.379	12.137	17.463
postGMF-runs\2client\WT_analysis\more_scans\WWC3\WWC3_609-624_output	2client	WT	unknown	ADSCEGPGLGALDRLR	rank_018	0.74	C-D	1.38179	D	A,6-13	GPGLGALD	36.259	7.119	13.607		postGMF-runs\1client\WT_analysis\more_scans\WWC3\WWC3_609-624_output	1client	WT	unknown	ADSCEGPGLGALDRLR	rank_022	0.75	B-C	1.42708	B	A,4-11	CEGPGLGA	28.379	12.137	17.463
postGMF-runs\2client\WT_analysis\more_scans\WWC3\WWC3_609-624_output	2client	WT	unknown	ADSCEGPGLGALDRLR	rank_016	0.74	C-D	1.35393	C	A,5-12	EGPGLGAL	36.059	7.335	13.46		postGMF-runs\1client\WT_analysis\more_scans\WWC3\WWC3_609-624_output	1client	WT	unknown	ADSCEGPGLGALDRLR	rank_002	0.81	B-C	1.00636	C	A,6-13	GPGLGALD	28.351	11.473	15.967
postGMF-runs\2client\WT_analysis\more_scans\WWC3\WWC3_609-624_output	2client	WT	unknown	ADSCEGPGLGALDRLR	rank_016	0.74	C-D	1.35393	D	B,5-12	EGPGLGAL	35.755	7.421	13.519		postGMF-runs\1client\WT_analysis\more_scans\WWC3\WWC3_609-624_output	1client	WT	unknown	ADSCEGPGLGALDRLR	rank_002	0.81	B-C	1.00636	C	A,6-13	GPGLGALD	28.351	11.473	15.967
postGMF-runs\2client\WT_analysis\more_scans\WWC3\WWC3_609-624_output	2client	WT	unknown	ADSCEGPGLGALDRLR	rank_003	0.78	C-D	1.03045	D	B,4-11	CEGPGLGA	35.258	7.55	13.227		postGMF-runs\1client\WT_analysis\more_scans\WWC3\WWC3_609-624_output	1client	WT	unknown	ADSCEGPGLGALDRLR	rank_007	0.79	B-C	1.193	C	A,6-13	GPGLGALD	28.055	10.803	14.867
postGMF-runs\2client\WT_analysis\more_scans\WWC3\WWC3_609-624_output	2client	WT	unknown	ADSCEGPGLGALDRLR	rank_003	0.78	C-D	1.03045	C	A,4-11	CEGPGLGA	35.219	7.553	13.272		postGMF-runs\1client\WT_analysis\more_scans\WWC3\WWC3_609-624_output	1client	WT	unknown	ADSCEGPGLGALDRLR	rank_007	0.79	B-C	1.193	C	A,6-13	GPGLGALD	28.055	10.803	14.867
postGMF-runs\2client\WT_analysis\more_scans\WWC3\WWC3_609-624_output	2client	WT	unknown	ADSCEGPGLGALDRLR	rank_004	0.77	C-D	1.06125	D	A,4-11	CEGPGLGA	35.224	7.473	13.375		postGMF-runs\1client\WT_analysis\more_scans\WWC3\WWC3_609-624_output	1client	WT	unknown	ADSCEGPGLGALDRLR	rank_006	0.8	B-C	1.112	B	A,6-13	GPGLGALD	27.993	11.206	15.625
postGMF-runs\2client\WT_analysis\more_scans\WWC3\WWC3_609-624_output	2client	WT	unknown	ADSCEGPGLGALDRLR	rank_004	0.77	C-D	1.06125	C	B,4-11	CEGPGLGA	34.919	7.557	13.399		postGMF-runs\1client\WT_analysis\more_scans\WWC3\WWC3_609-624_output	1client	WT	unknown	ADSCEGPGLGALDRLR	rank_006	0.8	B-C	1.112	B	A,6-13	GPGLGALD	27.993	11.206	15.625
postGMF-runs\2client\WT_analysis\more_scans\WWC3\WWC3_609-624_output	2client	WT	unknown	ADSCEGPGLGALDRLR	rank_020	0.74	C-D	1.35667	D	A,4-11	CEGPGLGA	35.144	7.426	13.275		postGMF-runs\1client\WT_analysis\more_scans\WWC3\WWC3_609-624_output	1client	WT	unknown	ADSCEGPGLGALDRLR	rank_004	0.81	B-C	0.996818	C	A,5-12	EGPGLGAL	27.743	11.512	16.073
postGMF-runs\2client\WT_analysis\more_scans\WWC3\WWC3_609-624_output	2client	WT	unknown	ADSCEGPGLGALDRLR	rank_020	0.74	C-D	1.35667	C	B,4-11	CEGPGLGA	35.004	7.388	13.248		postGMF-runs\1client\WT_analysis\more_scans\WWC3\WWC3_609-624_output	1client	WT	unknown	ADSCEGPGLGALDRLR	rank_004	0.81	B-C	0.996818	C	A,5-12	EGPGLGAL	27.743	11.512	16.073
postGMF-runs\2client\WT_analysis\more_scans\WWC3\WWC3_609-624_output	2client	WT	unknown	ADSCEGPGLGALDRLR	rank_025	0.73	C-D	1.38375	D	B,6-13	GPGLGALD	35.011	8.118	13.772		postGMF-runs\1client\WT_analysis\more_scans\WWC3\WWC3_609-624_output	1client	WT	unknown	ADSCEGPGLGALDRLR	rank_003	0.81	B-C	1.00318	C	A,5-12	EGPGLGAL	27.598	11.704	15.998
postGMF-runs\2client\WT_analysis\more_scans\WWC3\WWC3_609-624_output	2client	WT	unknown	ADSCEGPGLGALDRLR	rank_025	0.73	C-D	1.38375	C	A,6-13	GPGLGALD	35.009	8.12	13.72		postGMF-runs\1client\WT_analysis\more_scans\WWC3\WWC3_609-624_output	1client	WT	unknown	ADSCEGPGLGALDRLR	rank_003	0.81	B-C	1.00318	C	A,5-12	EGPGLGAL	27.598	11.704	15.998
postGMF-runs\2client\WT_analysis\more_scans\WWC3\WWC3_609-624_output	2client	WT	unknown	ADSCEGPGLGALDRLR	rank_022	0.73	C-D	1.39042	C	B,6-13	GPGLGALD	34.549	7.443	12.547		postGMF-runs\1client\WT_analysis\more_scans\WWC3\WWC3_609-624_output	1client	WT	unknown	ADSCEGPGLGALDRLR	rank_005	0.81	B-C	1.00773	C	A,5-12	EGPGLGAL	27.436	11.755	16.241
postGMF-runs\2client\WT_analysis\more_scans\WWC3\WWC3_609-624_output	2client	WT	unknown	ADSCEGPGLGALDRLR	rank_022	0.73	C-D	1.39042	D	A,6-13	GPGLGALD	34.324	7.699	12.996		postGMF-runs\1client\WT_analysis\more_scans\WWC3\WWC3_609-624_output	1client	WT	unknown	ADSCEGPGLGALDRLR	rank_005	0.81	B-C	1.00773	C	A,5-12	EGPGLGAL	27.436	11.755	16.241
postGMF-runs\2client\WT_analysis\more_scans\WWC3\WWC3_609-624_output	2client	WT	unknown	ADSCEGPGLGALDRLR	rank_005	0.77	C-D	1.05455	C	B,3-10	SCEGPGLG	33.174	7.896	13.835
postGMF-runs\2client\WT_analysis\more_scans\WWC3\WWC3_609-624_output	2client	WT	unknown	ADSCEGPGLGALDRLR	rank_005	0.77	C-D	1.05455	D	A,3-10	SCEGPGLG	33.094	7.985	13.952
postGMF-runs\2client\WT_analysis\more_scans\MARK3\MARK3_441-456_output	2client	WT	unknown	ADSDLKEDGISSRKSS	rank_001	0.88	C-D	0.967273	C	B,4-11	DLKEDGIS	88.101	1.871	4.04		postGMF-runs\1client\WT_analysis\more_scans\MARK3\MARK3_441-456_output	1client	WT	unknown	ADSDLKEDGISSRKSS	rank_001	0.89	B-C	0.950455	C	A,4-11	DLKEDGIS	85.117	2.597	4.815
postGMF-runs\2client\WT_analysis\more_scans\MARK3\MARK3_441-456_output	2client	WT	unknown	ADSDLKEDGISSRKSS	rank_001	0.88	C-D	0.967273	D	A,4-11	DLKEDGIS	87.71	1.936	4.139		postGMF-runs\1client\WT_analysis\more_scans\MARK3\MARK3_441-456_output	1client	WT	unknown	ADSDLKEDGISSRKSS	rank_001	0.89	B-C	0.950455	C	A,4-11	DLKEDGIS	85.117	2.597	4.815
postGMF-runs\2client\WT_analysis\more_scans\MARK3\MARK3_441-456_output	2client	WT	unknown	ADSDLKEDGISSRKSS	rank_002	0.87	C-D	0.985909	D	B,4-11	DLKEDGIS	86.475	2.139	4.455		postGMF-runs\1client\WT_analysis\more_scans\MARK3\MARK3_441-456_output	1client	WT	unknown	ADSDLKEDGISSRKSS	rank_002	0.89	B-C	0.96	B	A,4-11	DLKEDGIS	82.281	3.192	5.573
postGMF-runs\2client\WT_analysis\more_scans\MARK3\MARK3_441-456_output	2client	WT	unknown	ADSDLKEDGISSRKSS	rank_002	0.87	C-D	0.985909	C	A,4-11	DLKEDGIS	85.853	2.2	4.549		postGMF-runs\1client\WT_analysis\more_scans\MARK3\MARK3_441-456_output	1client	WT	unknown	ADSDLKEDGISSRKSS	rank_002	0.89	B-C	0.96	B	A,4-11	DLKEDGIS	82.281	3.192	5.573
postGMF-runs\2client\WT_analysis\more_scans\MARK3\MARK3_441-456_output	2client	WT	unknown	ADSDLKEDGISSRKSS	rank_005	0.87	C-D	0.966	C	A,4-11	DLKEDGIS	86.195	2.286	4.419		postGMF-runs\1client\WT_analysis\more_scans\MARK3\MARK3_441-456_output	1client	WT	unknown	ADSDLKEDGISSRKSS	rank_004	0.88	B-C	1.012	C	A,4-11	DLKEDGIS	82.204	2.761	5.32
postGMF-runs\2client\WT_analysis\more_scans\MARK3\MARK3_441-456_output	2client	WT	unknown	ADSDLKEDGISSRKSS	rank_005	0.87	C-D	0.966	D	B,4-11	DLKEDGIS	84.874	2.505	4.676		postGMF-runs\1client\WT_analysis\more_scans\MARK3\MARK3_441-456_output	1client	WT	unknown	ADSDLKEDGISSRKSS	rank_004	0.88	B-C	1.012	C	A,4-11	DLKEDGIS	82.204	2.761	5.32
postGMF-runs\2client\WT_analysis\more_scans\MARK3\MARK3_441-456_output	2client	WT	unknown	ADSDLKEDGISSRKSS	rank_004	0.87	C-D	0.96	D	A,4-11	DLKEDGIS	86.031	2.269	4.499		postGMF-runs\1client\WT_analysis\more_scans\MARK3\MARK3_441-456_output	1client	WT	unknown	ADSDLKEDGISSRKSS	rank_006	0.88	B-C	0.963182	C	A,4-11	DLKEDGIS	80.908	3.716	5.874
postGMF-runs\2client\WT_analysis\more_scans\MARK3\MARK3_441-456_output	2client	WT	unknown	ADSDLKEDGISSRKSS	rank_004	0.87	C-D	0.96	C	B,4-11	DLKEDGIS	85.439	2.341	4.599		postGMF-runs\1client\WT_analysis\more_scans\MARK3\MARK3_441-456_output	1client	WT	unknown	ADSDLKEDGISSRKSS	rank_006	0.88	B-C	0.963182	C	A,4-11	DLKEDGIS	80.908	3.716	5.874
postGMF-runs\2client\WT_analysis\more_scans\MARK3\MARK3_441-456_output	2client	WT	unknown	ADSDLKEDGISSRKSS	rank_003	0.87	C-D	0.984545	D	B,4-11	DLKEDGIS	85.912	2.263	4.37		postGMF-runs\1client\WT_analysis\more_scans\MARK3\MARK3_441-456_output	1client	WT	unknown	ADSDLKEDGISSRKSS	rank_003	0.88	B-C	0.970455	B	A,4-11	DLKEDGIS	80.782	3.371	5.645
postGMF-runs\2client\WT_analysis\more_scans\MARK3\MARK3_441-456_output	2client	WT	unknown	ADSDLKEDGISSRKSS	rank_003	0.87	C-D	0.984545	C	A,4-11	DLKEDGIS	85.881	2.279	4.391		postGMF-runs\1client\WT_analysis\more_scans\MARK3\MARK3_441-456_output	1client	WT	unknown	ADSDLKEDGISSRKSS	rank_003	0.88	B-C	0.970455	B	A,4-11	DLKEDGIS	80.782	3.371	5.645
postGMF-runs\2client\WT_analysis\more_scans\MARK3\MARK3_441-456_output	2client	WT	unknown	ADSDLKEDGISSRKSS	rank_009	0.87	C-D	0.965455	C	B,4-11	DLKEDGIS	85.398	2.237	4.65		postGMF-runs\1client\WT_analysis\more_scans\MARK3\MARK3_441-456_output	1client	WT	unknown	ADSDLKEDGISSRKSS	rank_005	0.88	B-C	0.956364	B	A,4-11	DLKEDGIS	80.539	3.842	6.135
postGMF-runs\2client\WT_analysis\more_scans\MARK3\MARK3_441-456_output	2client	WT	unknown	ADSDLKEDGISSRKSS	rank_009	0.87	C-D	0.965455	D	A,4-11	DLKEDGIS	84.914	2.267	4.748		postGMF-runs\1client\WT_analysis\more_scans\MARK3\MARK3_441-456_output	1client	WT	unknown	ADSDLKEDGISSRKSS	rank_005	0.88	B-C	0.956364	B	A,4-11	DLKEDGIS	80.539	3.842	6.135
postGMF-runs\2client\WT_analysis\more_scans\MARK3\MARK3_441-456_output	2client	WT	unknown	ADSDLKEDGISSRKSS	rank_006	0.87	C-D	0.979545	C	B,4-11	DLKEDGIS	85.062	2.375	4.608		postGMF-runs\1client\WT_analysis\more_scans\MARK3\MARK3_441-456_output	1client	WT	unknown	ADSDLKEDGISSRKSS	rank_009	0.88	B-C	0.966364	B	A,4-11	DLKEDGIS	80.141	4.075	5.937
postGMF-runs\2client\WT_analysis\more_scans\MARK3\MARK3_441-456_output	2client	WT	unknown	ADSDLKEDGISSRKSS	rank_006	0.87	C-D	0.979545	D	A,4-11	DLKEDGIS	84.97	2.385	4.645		postGMF-runs\1client\WT_analysis\more_scans\MARK3\MARK3_441-456_output	1client	WT	unknown	ADSDLKEDGISSRKSS	rank_009	0.88	B-C	0.966364	B	A,4-11	DLKEDGIS	80.141	4.075	5.937
postGMF-runs\2client\WT_analysis\more_scans\MARK3\MARK3_441-456_output	2client	WT	unknown	ADSDLKEDGISSRKSS	rank_008	0.87	C-D	0.970455	D	B,4-11	DLKEDGIS	84.562	2.305	4.766		postGMF-runs\1client\WT_analysis\more_scans\MARK3\MARK3_441-456_output	1client	WT	unknown	ADSDLKEDGISSRKSS	rank_008	0.88	B-C	0.956364	B	A,4-11	DLKEDGIS	79.616	4.076	6.075
postGMF-runs\2client\WT_analysis\more_scans\MARK3\MARK3_441-456_output	2client	WT	unknown	ADSDLKEDGISSRKSS	rank_008	0.87	C-D	0.970455	C	A,4-11	DLKEDGIS	83.374	2.487	4.962		postGMF-runs\1client\WT_analysis\more_scans\MARK3\MARK3_441-456_output	1client	WT	unknown	ADSDLKEDGISSRKSS	rank_008	0.88	B-C	0.956364	B	A,4-11	DLKEDGIS	79.616	4.076	6.075
postGMF-runs\2client\WT_analysis\more_scans\MARK3\MARK3_441-456_output	2client	WT	unknown	ADSDLKEDGISSRKSS	rank_010	0.87	C-D	1.03591	C	A,4-11	DLKEDGIS	84.352	1.995	4.775		postGMF-runs\1client\WT_analysis\more_scans\MARK3\MARK3_441-456_output	1client	WT	unknown	ADSDLKEDGISSRKSS	rank_007	0.88	B-C	1.01318	B	A,4-11	DLKEDGIS	78.835	3.419	6.306
postGMF-runs\2client\WT_analysis\more_scans\MARK3\MARK3_441-456_output	2client	WT	unknown	ADSDLKEDGISSRKSS	rank_010	0.87	C-D	1.03591	D	B,4-11	DLKEDGIS	84.33	1.998	4.778		postGMF-runs\1client\WT_analysis\more_scans\MARK3\MARK3_441-456_output	1client	WT	unknown	ADSDLKEDGISSRKSS	rank_007	0.88	B-C	1.01318	B	A,4-11	DLKEDGIS	78.835	3.419	6.306
postGMF-runs\2client\WT_analysis\more_scans\MARK3\MARK3_441-456_output	2client	WT	unknown	ADSDLKEDGISSRKSS	rank_014	0.86	C-D	1.05682	D	B,4-11	DLKEDGIS	83.735	2.041	4.79		postGMF-runs\1client\WT_analysis\more_scans\MARK3\MARK3_441-456_output	1client	WT	unknown	ADSDLKEDGISSRKSS	rank_010	0.88	B-C	1.03318	C	A,4-11	DLKEDGIS	78.673	3.316	6.213
postGMF-runs\2client\WT_analysis\more_scans\MARK3\MARK3_441-456_output	2client	WT	unknown	ADSDLKEDGISSRKSS	rank_014	0.86	C-D	1.05682	C	A,4-11	DLKEDGIS	83.524	2.064	4.839		postGMF-runs\1client\WT_analysis\more_scans\MARK3\MARK3_441-456_output	1client	WT	unknown	ADSDLKEDGISSRKSS	rank_010	0.88	B-C	1.03318	C	A,4-11	DLKEDGIS	78.673	3.316	6.213
postGMF-runs\2client\WT_analysis\more_scans\MARK3\MARK3_441-456_output	2client	WT	unknown	ADSDLKEDGISSRKSS	rank_007	0.87	C-D	0.998846	D	A,4-11	DLKEDGIS	83.498	2.522	5.109		postGMF-runs\1client\WT_analysis\more_scans\MARK3\MARK3_441-456_output	1client	WT	unknown	ADSDLKEDGISSRKSS	rank_011	0.88	B-C	0.969091	C	A,4-11	DLKEDGIS	77.734	4.099	6.45
postGMF-runs\2client\WT_analysis\more_scans\MARK3\MARK3_441-456_output	2client	WT	unknown	ADSDLKEDGISSRKSS	rank_007	0.87	C-D	0.998846	C	B,4-11	DLKEDGIS	83.054	2.563	5.157		postGMF-runs\1client\WT_analysis\more_scans\MARK3\MARK3_441-456_output	1client	WT	unknown	ADSDLKEDGISSRKSS	rank_011	0.88	B-C	0.969091	C	A,4-11	DLKEDGIS	77.734	4.099	6.45
postGMF-runs\2client\WT_analysis\more_scans\MARK3\MARK3_441-456_output	2client	WT	unknown	ADSDLKEDGISSRKSS	rank_012	0.87	C-D	0.965455	C	A,4-11	DLKEDGIS	83.398	2.729	5.096		postGMF-runs\1client\WT_analysis\more_scans\MARK3\MARK3_441-456_output	1client	WT	unknown	ADSDLKEDGISSRKSS	rank_015	0.86	B-C	1.06227	C	A,5-12	LKEDGISS	75.461	4.049	6.028
postGMF-runs\2client\WT_analysis\more_scans\MARK3\MARK3_441-456_output	2client	WT	unknown	ADSDLKEDGISSRKSS	rank_012	0.87	C-D	0.965455	D	B,4-11	DLKEDGIS	83.256	2.779	5.181		postGMF-runs\1client\WT_analysis\more_scans\MARK3\MARK3_441-456_output	1client	WT	unknown	ADSDLKEDGISSRKSS	rank_015	0.86	B-C	1.06227	C	A,5-12	LKEDGISS	75.461	4.049	6.028
postGMF-runs\2client\WT_analysis\more_scans\MARK3\MARK3_441-456_output	2client	WT	unknown	ADSDLKEDGISSRKSS	rank_013	0.86	C-D	1.00545	C	A,4-11	DLKEDGIS	83.233	2.506	5.198		postGMF-runs\1client\WT_analysis\more_scans\MARK3\MARK3_441-456_output	1client	WT	unknown	ADSDLKEDGISSRKSS	rank_012	0.87	B-C	0.965909	B	A,4-11	DLKEDGIS	75.382	4.868	6.788
postGMF-runs\2client\WT_analysis\more_scans\MARK3\MARK3_441-456_output	2client	WT	unknown	ADSDLKEDGISSRKSS	rank_013	0.86	C-D	1.00545	D	B,4-11	DLKEDGIS	82.819	2.605	5.29		postGMF-runs\1client\WT_analysis\more_scans\MARK3\MARK3_441-456_output	1client	WT	unknown	ADSDLKEDGISSRKSS	rank_012	0.87	B-C	0.965909	B	A,4-11	DLKEDGIS	75.382	4.868	6.788
postGMF-runs\2client\WT_analysis\more_scans\MARK3\MARK3_441-456_output	2client	WT	unknown	ADSDLKEDGISSRKSS	rank_011	0.87	C-D	0.988182	C	A,4-11	DLKEDGIS	83.151	2.55	5.155		postGMF-runs\1client\WT_analysis\more_scans\MARK3\MARK3_441-456_output	1client	WT	unknown	ADSDLKEDGISSRKSS	rank_013	0.87	B-C	1.03409	C	A,4-11	DLKEDGIS	75.019	4.445	7.201
postGMF-runs\2client\WT_analysis\more_scans\MARK3\MARK3_441-456_output	2client	WT	unknown	ADSDLKEDGISSRKSS	rank_011	0.87	C-D	0.988182	D	B,4-11	DLKEDGIS	82.943	2.572	5.213		postGMF-runs\1client\WT_analysis\more_scans\MARK3\MARK3_441-456_output	1client	WT	unknown	ADSDLKEDGISSRKSS	rank_013	0.87	B-C	1.03409	C	A,4-11	DLKEDGIS	75.019	4.445	7.201
postGMF-runs\2client\WT_analysis\more_scans\MARK3\MARK3_441-456_output	2client	WT	unknown	ADSDLKEDGISSRKSS	rank_017	0.86	C-D	1.12682	C	B,4-11	DLKEDGIS	83.07	2.004	4.747		postGMF-runs\1client\WT_analysis\more_scans\MARK3\MARK3_441-456_output	1client	WT	unknown	ADSDLKEDGISSRKSS	rank_014	0.87	B-C	1.03909	B	A,4-11	DLKEDGIS	73.464	4.732	7.421
postGMF-runs\2client\WT_analysis\more_scans\MARK3\MARK3_441-456_output	2client	WT	unknown	ADSDLKEDGISSRKSS	rank_017	0.86	C-D	1.12682	D	A,4-11	DLKEDGIS	82.844	2.035	4.816		postGMF-runs\1client\WT_analysis\more_scans\MARK3\MARK3_441-456_output	1client	WT	unknown	ADSDLKEDGISSRKSS	rank_014	0.87	B-C	1.03909	B	A,4-11	DLKEDGIS	73.464	4.732	7.421
postGMF-runs\2client\WT_analysis\more_scans\MARK3\MARK3_441-456_output	2client	WT	unknown	ADSDLKEDGISSRKSS	rank_016	0.86	C-D	1.08818	D	A,4-11	DLKEDGIS	82.056	2.085	5.018		postGMF-runs\1client\WT_analysis\more_scans\MARK3\MARK3_441-456_output	1client	WT	unknown	ADSDLKEDGISSRKSS	rank_016	0.85	B-C	0.977273	C	A,4-11	DLKEDGIS	61.742	6.741	8.57
postGMF-runs\2client\WT_analysis\more_scans\MARK3\MARK3_441-456_output	2client	WT	unknown	ADSDLKEDGISSRKSS	rank_016	0.86	C-D	1.08818	C	B,4-11	DLKEDGIS	81.531	2.126	5.103		postGMF-runs\1client\WT_analysis\more_scans\MARK3\MARK3_441-456_output	1client	WT	unknown	ADSDLKEDGISSRKSS	rank_016	0.85	B-C	0.977273	C	A,4-11	DLKEDGIS	61.742	6.741	8.57
postGMF-runs\2client\WT_analysis\more_scans\MARK3\MARK3_441-456_output	2client	WT	unknown	ADSDLKEDGISSRKSS	rank_015	0.86	C-D	0.9635	C	A,4-11	DLKEDGIS	81.976	2.888	5.433		postGMF-runs\1client\WT_analysis\more_scans\MARK3\MARK3_441-456_output	1client	WT	unknown	ADSDLKEDGISSRKSS	rank_017	0.85	B-C	0.98375	B	A,4-11	DLKEDGIS	60.991	6.648	8.726
postGMF-runs\2client\WT_analysis\more_scans\MARK3\MARK3_441-456_output	2client	WT	unknown	ADSDLKEDGISSRKSS	rank_015	0.86	C-D	0.9635	D	B,4-11	DLKEDGIS	81.775	2.911	5.474		postGMF-runs\1client\WT_analysis\more_scans\MARK3\MARK3_441-456_output	1client	WT	unknown	ADSDLKEDGISSRKSS	rank_017	0.85	B-C	0.98375	B	A,4-11	DLKEDGIS	60.991	6.648	8.726
postGMF-runs\2client\WT_analysis\more_scans\MARK3\MARK3_441-456_output	2client	WT	unknown	ADSDLKEDGISSRKSS	rank_019	0.85	C-D	1.12909	C	A,4-11	DLKEDGIS	80.649	2.178	5.166		postGMF-runs\1client\WT_analysis\more_scans\MARK3\MARK3_441-456_output	1client	WT	unknown	ADSDLKEDGISSRKSS	rank_018	0.83	B-C	1.07136	C	A,5-12	LKEDGISS	38.761	7.297	11.639
postGMF-runs\2client\WT_analysis\more_scans\MARK3\MARK3_441-456_output	2client	WT	unknown	ADSDLKEDGISSRKSS	rank_019	0.85	C-D	1.12909	D	B,4-11	DLKEDGIS	79.914	2.239	5.24		postGMF-runs\1client\WT_analysis\more_scans\MARK3\MARK3_441-456_output	1client	WT	unknown	ADSDLKEDGISSRKSS	rank_018	0.83	B-C	1.07136	C	A,5-12	LKEDGISS	38.761	7.297	11.639
postGMF-runs\2client\WT_analysis\more_scans\MARK3\MARK3_441-456_output	2client	WT	unknown	ADSDLKEDGISSRKSS	rank_018	0.86	C-D	0.981818	C	B,4-11	DLKEDGIS	79.695	3.326	6.014		postGMF-runs\1client\WT_analysis\more_scans\MARK3\MARK3_441-456_output	1client	WT	unknown	ADSDLKEDGISSRKSS	rank_019	0.82	B-C	1.00083	C	A,5-12	LKEDGISS	35.846	11.064	13.945
postGMF-runs\2client\WT_analysis\more_scans\MARK3\MARK3_441-456_output	2client	WT	unknown	ADSDLKEDGISSRKSS	rank_018	0.86	C-D	0.981818	D	A,4-11	DLKEDGIS	78.866	3.339	6.11		postGMF-runs\1client\WT_analysis\more_scans\MARK3\MARK3_441-456_output	1client	WT	unknown	ADSDLKEDGISSRKSS	rank_019	0.82	B-C	1.00083	C	A,5-12	LKEDGISS	35.846	11.064	13.945
postGMF-runs\2client\WT_analysis\more_scans\MARK3\MARK3_441-456_output	2client	WT	unknown	ADSDLKEDGISSRKSS	rank_020	0.84	C-D	1.00591	C	B,4-11	DLKEDGIS	75.246	3.9	6.798		postGMF-runs\1client\WT_analysis\more_scans\MARK3\MARK3_441-456_output	1client	WT	unknown	ADSDLKEDGISSRKSS	rank_021	0.82	B-C	0.989231	B	A,7-14	EDGISSRK	34.429	10.509	13.231
postGMF-runs\2client\WT_analysis\more_scans\MARK3\MARK3_441-456_output	2client	WT	unknown	ADSDLKEDGISSRKSS	rank_020	0.84	C-D	1.00591	D	A,4-11	DLKEDGIS	74.73	3.962	6.895		postGMF-runs\1client\WT_analysis\more_scans\MARK3\MARK3_441-456_output	1client	WT	unknown	ADSDLKEDGISSRKSS	rank_021	0.82	B-C	0.989231	B	A,7-14	EDGISSRK	34.429	10.509	13.231
postGMF-runs\2client\WT_analysis\more_scans\MARK3\MARK3_441-456_output	2client	WT	unknown	ADSDLKEDGISSRKSS	rank_022	0.8	C-D	1.27308	D	B,6-13	KEDGISSR	64.383	3.885	7.463		postGMF-runs\1client\WT_analysis\more_scans\MARK3\MARK3_441-456_output	1client	WT	unknown	ADSDLKEDGISSRKSS	rank_020	0.82	B-C	1.01727	C	A,5-12	LKEDGISS	32.93	8.828	12.207
postGMF-runs\2client\WT_analysis\more_scans\MARK3\MARK3_441-456_output	2client	WT	unknown	ADSDLKEDGISSRKSS	rank_022	0.8	C-D	1.27308	C	A,6-13	KEDGISSR	63.231	4.015	7.728		postGMF-runs\1client\WT_analysis\more_scans\MARK3\MARK3_441-456_output	1client	WT	unknown	ADSDLKEDGISSRKSS	rank_020	0.82	B-C	1.01727	C	A,5-12	LKEDGISS	32.93	8.828	12.207
postGMF-runs\2client\WT_analysis\more_scans\MARK3\MARK3_441-456_output	2client	WT	unknown	ADSDLKEDGISSRKSS	rank_023	0.79	C-D	1.19846	D	A,6-13	KEDGISSR	49.444	4.712	10.327		postGMF-runs\1client\WT_analysis\more_scans\MARK3\MARK3_441-456_output	1client	WT	unknown	ADSDLKEDGISSRKSS	rank_024	0.81	B-C	1.10955	C	A,5-12	LKEDGISS	32.23	9.048	12.302
postGMF-runs\2client\WT_analysis\more_scans\MARK3\MARK3_441-456_output	2client	WT	unknown	ADSDLKEDGISSRKSS	rank_023	0.79	C-D	1.19846	C	B,6-13	KEDGISSR	49.075	4.764	10.311		postGMF-runs\1client\WT_analysis\more_scans\MARK3\MARK3_441-456_output	1client	WT	unknown	ADSDLKEDGISSRKSS	rank_024	0.81	B-C	1.10955	C	A,5-12	LKEDGISS	32.23	9.048	12.302
postGMF-runs\2client\WT_analysis\more_scans\MARK3\MARK3_441-456_output	2client	WT	unknown	ADSDLKEDGISSRKSS	rank_025	0.78	C-D	1.19577	D	B,6-13	KEDGISSR	47.391	4.945	10.39		postGMF-runs\1client\WT_analysis\more_scans\MARK3\MARK3_441-456_output	1client	WT	unknown	ADSDLKEDGISSRKSS	rank_023	0.81	B-C	1.00455	C	A,5-12	LKEDGISS	31.363	12.186	15.492
postGMF-runs\2client\WT_analysis\more_scans\MARK3\MARK3_441-456_output	2client	WT	unknown	ADSDLKEDGISSRKSS	rank_025	0.78	C-D	1.19577	C	A,6-13	KEDGISSR	47.14	4.979	10.337		postGMF-runs\1client\WT_analysis\more_scans\MARK3\MARK3_441-456_output	1client	WT	unknown	ADSDLKEDGISSRKSS	rank_023	0.81	B-C	1.00455	C	A,5-12	LKEDGISS	31.363	12.186	15.492
postGMF-runs\2client\WT_analysis\more_scans\MARK3\MARK3_441-456_output	2client	WT	unknown	ADSDLKEDGISSRKSS	rank_024	0.79	C-D	1.18769	C	B,6-13	KEDGISSR	46.847	4.903	10.521		postGMF-runs\1client\WT_analysis\more_scans\MARK3\MARK3_441-456_output	1client	WT	unknown	ADSDLKEDGISSRKSS	rank_022	0.82	B-C	0.977692	B	A,8-15	DGISSRKS	30.428	12.489	14.44
postGMF-runs\2client\WT_analysis\more_scans\MARK3\MARK3_441-456_output	2client	WT	unknown	ADSDLKEDGISSRKSS	rank_024	0.79	C-D	1.18769	D	A,6-13	KEDGISSR	46.499	4.911	10.58		postGMF-runs\1client\WT_analysis\more_scans\MARK3\MARK3_441-456_output	1client	WT	unknown	ADSDLKEDGISSRKSS	rank_022	0.82	B-C	0.977692	B	A,8-15	DGISSRKS	30.428	12.489	14.44
postGMF-runs\2client\WT_analysis\more_scans\MARK3\MARK3_441-456_output	2client	WT	unknown	ADSDLKEDGISSRKSS	rank_021	0.8	C-D	1.11455	C	B,6-13	KEDGISSR	46.513	5.092	10.649		postGMF-runs\1client\WT_analysis\more_scans\MARK3\MARK3_441-456_output	1client	WT	unknown	ADSDLKEDGISSRKSS	rank_025	0.81	B-C	1.07409	C	A,5-12	LKEDGISS	29.919	9.758	12.976
postGMF-runs\2client\WT_analysis\more_scans\MARK3\MARK3_441-456_output	2client	WT	unknown	ADSDLKEDGISSRKSS	rank_021	0.8	C-D	1.11455	D	A,6-13	KEDGISSR	46.457	5.059	10.638		postGMF-runs\1client\WT_analysis\more_scans\MARK3\MARK3_441-456_output	1client	WT	unknown	ADSDLKEDGISSRKSS	rank_025	0.81	B-C	1.07409	C	A,5-12	LKEDGISS	29.919	9.758	12.976
2client\hASCIZ-parsed\hASCIZ_321-336_output	2client	WT	unknown	ADSSAQPVVLGVDQGS	rank_001	0.84	C-D	1.00455	C	A,6-13	QPVVLGVD	74.18	4.211	7.044		1client\hASCIZ-parsed\hASCIZ_321-336_output	1client	WT	unknown	ADSSAQPVVLGVDQGS	rank_018	0.81	B-C	1.14727	C	A,4-11	SAQPVVLG	36.501	8.345	12.384
2client\hASCIZ-parsed\hASCIZ_321-336_output	2client	WT	unknown	ADSSAQPVVLGVDQGS	rank_001	0.84	C-D	1.00455	D	B,6-13	QPVVLGVD	72.91	4.534	7.385		1client\hASCIZ-parsed\hASCIZ_321-336_output	1client	WT	unknown	ADSSAQPVVLGVDQGS	rank_018	0.81	B-C	1.14727	C	A,4-11	SAQPVVLG	36.501	8.345	12.384
2client\hASCIZ-parsed\hASCIZ_321-336_output	2client	WT	unknown	ADSSAQPVVLGVDQGS	rank_002	0.8	C-D	1.352	D	B,5-12	AQPVVLGV	71.671	2.956	5.38		1client\hASCIZ-parsed\hASCIZ_321-336_output	1client	WT	unknown	ADSSAQPVVLGVDQGS	rank_003	0.82	B-C	1.0225	B	A,6-13	QPVVLGVD	35.974	10.162	12.411
2client\hASCIZ-parsed\hASCIZ_321-336_output	2client	WT	unknown	ADSSAQPVVLGVDQGS	rank_002	0.8	C-D	1.352	C	A,5-12	AQPVVLGV	71.055	3.077	5.574		1client\hASCIZ-parsed\hASCIZ_321-336_output	1client	WT	unknown	ADSSAQPVVLGVDQGS	rank_003	0.82	B-C	1.0225	B	A,6-13	QPVVLGVD	35.974	10.162	12.411
2client\hASCIZ-parsed\hASCIZ_321-336_output	2client	WT	unknown	ADSSAQPVVLGVDQGS	rank_015	0.78	C-D	1.35467	D	A,6-13	QPVVLGVD	55.804	4.664	8.74		1client\hASCIZ-parsed\hASCIZ_321-336_output	1client	WT	unknown	ADSSAQPVVLGVDQGS	rank_022	0.8	B-C	1.20318	B	A,5-12	AQPVVLGV	34.714	8.709	12.344
2client\hASCIZ-parsed\hASCIZ_321-336_output	2client	WT	unknown	ADSSAQPVVLGVDQGS	rank_015	0.78	C-D	1.35467	C	B,6-13	QPVVLGVD	55.625	4.666	8.801		1client\hASCIZ-parsed\hASCIZ_321-336_output	1client	WT	unknown	ADSSAQPVVLGVDQGS	rank_022	0.8	B-C	1.20318	B	A,5-12	AQPVVLGV	34.714	8.709	12.344
2client\hASCIZ-parsed\hASCIZ_321-336_output	2client	WT	unknown	ADSSAQPVVLGVDQGS	rank_008	0.79	C-D	1.19208	C	A,5-12	AQPVVLGV	45.803	5.227	10.658		1client\hASCIZ-parsed\hASCIZ_321-336_output	1client	WT	unknown	ADSSAQPVVLGVDQGS	rank_006	0.82	B-C	1.06864	C	A,5-12	AQPVVLGV	34.436	8.826	12.512
2client\hASCIZ-parsed\hASCIZ_321-336_output	2client	WT	unknown	ADSSAQPVVLGVDQGS	rank_008	0.79	C-D	1.19208	D	B,5-12	AQPVVLGV	43.298	5.657	11.157		1client\hASCIZ-parsed\hASCIZ_321-336_output	1client	WT	unknown	ADSSAQPVVLGVDQGS	rank_006	0.82	B-C	1.06864	C	A,5-12	AQPVVLGV	34.436	8.826	12.512
2client\hASCIZ-parsed\hASCIZ_321-336_output	2client	WT	unknown	ADSSAQPVVLGVDQGS	rank_003	0.8	C-D	1.125	D	B,5-12	AQPVVLGV	44.996	5.508	10.446		1client\hASCIZ-parsed\hASCIZ_321-336_output	1client	WT	unknown	ADSSAQPVVLGVDQGS	rank_008	0.82	B-C	1.02375	C	A,5-12	AQPVVLGV	33.961	10.153	13.517
2client\hASCIZ-parsed\hASCIZ_321-336_output	2client	WT	unknown	ADSSAQPVVLGVDQGS	rank_003	0.8	C-D	1.125	C	A,5-12	AQPVVLGV	44.763	5.52	10.332		1client\hASCIZ-parsed\hASCIZ_321-336_output	1client	WT	unknown	ADSSAQPVVLGVDQGS	rank_008	0.82	B-C	1.02375	C	A,5-12	AQPVVLGV	33.961	10.153	13.517
2client\hASCIZ-parsed\hASCIZ_321-336_output	2client	WT	unknown	ADSSAQPVVLGVDQGS	rank_004	0.79	C-D	1.03409	D	A,5-12	AQPVVLGV	44.298	6.265	12.066		1client\hASCIZ-parsed\hASCIZ_321-336_output	1client	WT	unknown	ADSSAQPVVLGVDQGS	rank_001	0.83	B-C	0.979091	C	A,5-12	AQPVVLGV	33.923	9.425	13.37
2client\hASCIZ-parsed\hASCIZ_321-336_output	2client	WT	unknown	ADSSAQPVVLGVDQGS	rank_004	0.79	C-D	1.03409	C	B,5-12	AQPVVLGV	44.196	6.24	11.982		1client\hASCIZ-parsed\hASCIZ_321-336_output	1client	WT	unknown	ADSSAQPVVLGVDQGS	rank_001	0.83	B-C	0.979091	C	A,5-12	AQPVVLGV	33.923	9.425	13.37
2client\hASCIZ-parsed\hASCIZ_321-336_output	2client	WT	unknown	ADSSAQPVVLGVDQGS	rank_007	0.79	C-D	0.996364	D	A,5-12	AQPVVLGV	43.548	6.635	11.86		1client\hASCIZ-parsed\hASCIZ_321-336_output	1client	WT	unknown	ADSSAQPVVLGVDQGS	rank_023	0.79	B-C	1.19727	B	A,5-12	AQPVVLGV	33.54	9.088	12.64
2client\hASCIZ-parsed\hASCIZ_321-336_output	2client	WT	unknown	ADSSAQPVVLGVDQGS	rank_007	0.79	C-D	0.996364	C	B,5-12	AQPVVLGV	43.526	6.609	11.689		1client\hASCIZ-parsed\hASCIZ_321-336_output	1client	WT	unknown	ADSSAQPVVLGVDQGS	rank_023	0.79	B-C	1.19727	B	A,5-12	AQPVVLGV	33.54	9.088	12.64
2client\hASCIZ-parsed\hASCIZ_321-336_output	2client	WT	unknown	ADSSAQPVVLGVDQGS	rank_005	0.79	C-D	1.05955	C	A,3-10	SSAQPVVL	43.076	6.133	12.262		1client\hASCIZ-parsed\hASCIZ_321-336_output	1client	WT	unknown	ADSSAQPVVLGVDQGS	rank_007	0.82	B-C	1.03682	C	A,4-11	SAQPVVLG	32.544	9.503	13.185
2client\hASCIZ-parsed\hASCIZ_321-336_output	2client	WT	unknown	ADSSAQPVVLGVDQGS	rank_005	0.79	C-D	1.05955	D	B,3-10	SSAQPVVL	42.946	6.128	12.413		1client\hASCIZ-parsed\hASCIZ_321-336_output	1client	WT	unknown	ADSSAQPVVLGVDQGS	rank_007	0.82	B-C	1.03682	C	A,4-11	SAQPVVLG	32.544	9.503	13.185
2client\hASCIZ-parsed\hASCIZ_321-336_output	2client	WT	unknown	ADSSAQPVVLGVDQGS	rank_018	0.78	C-D	1.19267	D	B,5-12	AQPVVLGV	43.018	5.857	11.742		1client\hASCIZ-parsed\hASCIZ_321-336_output	1client	WT	unknown	ADSSAQPVVLGVDQGS	rank_013	0.81	B-C	1.1445	B	A,5-12	AQPVVLGV	32.124	9.662	13.084
2client\hASCIZ-parsed\hASCIZ_321-336_output	2client	WT	unknown	ADSSAQPVVLGVDQGS	rank_018	0.78	C-D	1.19267	C	A,5-12	AQPVVLGV	41.649	6.127	12.293		1client\hASCIZ-parsed\hASCIZ_321-336_output	1client	WT	unknown	ADSSAQPVVLGVDQGS	rank_013	0.81	B-C	1.1445	B	A,5-12	AQPVVLGV	32.124	9.662	13.084
2client\hASCIZ-parsed\hASCIZ_321-336_output	2client	WT	unknown	ADSSAQPVVLGVDQGS	rank_014	0.78	C-D	1.17682	D	B,5-12	AQPVVLGV	42.34	6.281	11.864		1client\hASCIZ-parsed\hASCIZ_321-336_output	1client	WT	unknown	ADSSAQPVVLGVDQGS	rank_009	0.82	B-C	1.04727	C	A,4-11	SAQPVVLG	32.005	9.997	13.443
2client\hASCIZ-parsed\hASCIZ_321-336_output	2client	WT	unknown	ADSSAQPVVLGVDQGS	rank_014	0.78	C-D	1.17682	C	A,5-12	AQPVVLGV	40.977	6.572	12.155		1client\hASCIZ-parsed\hASCIZ_321-336_output	1client	WT	unknown	ADSSAQPVVLGVDQGS	rank_009	0.82	B-C	1.04727	C	A,4-11	SAQPVVLG	32.005	9.997	13.443
2client\hASCIZ-parsed\hASCIZ_321-336_output	2client	WT	unknown	ADSSAQPVVLGVDQGS	rank_006	0.79	C-D	1.082	D	B,5-12	AQPVVLGV	41.818	5.935	10.37		1client\hASCIZ-parsed\hASCIZ_321-336_output	1client	WT	unknown	ADSSAQPVVLGVDQGS	rank_002	0.83	B-C	0.993333	B	A,5-12	AQPVVLGV	31.72	9.904	13.291
2client\hASCIZ-parsed\hASCIZ_321-336_output	2client	WT	unknown	ADSSAQPVVLGVDQGS	rank_006	0.79	C-D	1.082	C	A,6-13	QPVVLGVD	41.775	5.811	10.312		1client\hASCIZ-parsed\hASCIZ_321-336_output	1client	WT	unknown	ADSSAQPVVLGVDQGS	rank_002	0.83	B-C	0.993333	B	A,5-12	AQPVVLGV	31.72	9.904	13.291
2client\hASCIZ-parsed\hASCIZ_321-336_output	2client	WT	unknown	ADSSAQPVVLGVDQGS	rank_025	0.76	C-D	1.21867	D	B,4-11	SAQPVVLG	41.031	6.307	11.709		1client\hASCIZ-parsed\hASCIZ_321-336_output	1client	WT	unknown	ADSSAQPVVLGVDQGS	rank_010	0.81	B-C	1.01292	B	A,5-12	AQPVVLGV	31.166	11.173	13.94
2client\hASCIZ-parsed\hASCIZ_321-336_output	2client	WT	unknown	ADSSAQPVVLGVDQGS	rank_025	0.76	C-D	1.21867	C	A,4-11	SAQPVVLG	40.906	6.359	11.769		1client\hASCIZ-parsed\hASCIZ_321-336_output	1client	WT	unknown	ADSSAQPVVLGVDQGS	rank_010	0.81	B-C	1.01292	B	A,5-12	AQPVVLGV	31.166	11.173	13.94
2client\hASCIZ-parsed\hASCIZ_321-336_output	2client	WT	unknown	ADSSAQPVVLGVDQGS	rank_024	0.76	C-D	1.235	D	A,5-12	AQPVVLGV	40.703	6.678	12.501		1client\hASCIZ-parsed\hASCIZ_321-336_output	1client	WT	unknown	ADSSAQPVVLGVDQGS	rank_019	0.81	B-C	1.1615	B	A,4-11	SAQPVVLG	30.994	10.382	13.127
2client\hASCIZ-parsed\hASCIZ_321-336_output	2client	WT	unknown	ADSSAQPVVLGVDQGS	rank_024	0.76	C-D	1.235	C	B,5-12	AQPVVLGV	40.561	6.703	12.641		1client\hASCIZ-parsed\hASCIZ_321-336_output	1client	WT	unknown	ADSSAQPVVLGVDQGS	rank_019	0.81	B-C	1.1615	B	A,4-11	SAQPVVLG	30.994	10.382	13.127
2client\hASCIZ-parsed\hASCIZ_321-336_output	2client	WT	unknown	ADSSAQPVVLGVDQGS	rank_020	0.77	C-D	1.28321	C	A,6-13	QPVVLGVD	39.914	5.812	11.473		1client\hASCIZ-parsed\hASCIZ_321-336_output	1client	WT	unknown	ADSSAQPVVLGVDQGS	rank_025	0.79	B-C	1.23318	C	A,5-12	AQPVVLGV	30.965	10.072	13.158
2client\hASCIZ-parsed\hASCIZ_321-336_output	2client	WT	unknown	ADSSAQPVVLGVDQGS	rank_020	0.77	C-D	1.28321	D	B,6-13	QPVVLGVD	39.431	5.945	11.689		1client\hASCIZ-parsed\hASCIZ_321-336_output	1client	WT	unknown	ADSSAQPVVLGVDQGS	rank_025	0.79	B-C	1.23318	C	A,5-12	AQPVVLGV	30.965	10.072	13.158
2client\hASCIZ-parsed\hASCIZ_321-336_output	2client	WT	unknown	ADSSAQPVVLGVDQGS	rank_010	0.79	C-D	1.03	D	B,6-13	QPVVLGVD	39.569	6.371	11.224		1client\hASCIZ-parsed\hASCIZ_321-336_output	1client	WT	unknown	ADSSAQPVVLGVDQGS	rank_015	0.81	B-C	1.08318	B	A,4-11	SAQPVVLG	29.916	9.784	13.777
2client\hASCIZ-parsed\hASCIZ_321-336_output	2client	WT	unknown	ADSSAQPVVLGVDQGS	rank_010	0.79	C-D	1.03	C	A,5-12	AQPVVLGV	39.074	6.527	11.215		1client\hASCIZ-parsed\hASCIZ_321-336_output	1client	WT	unknown	ADSSAQPVVLGVDQGS	rank_015	0.81	B-C	1.08318	B	A,4-11	SAQPVVLG	29.916	9.784	13.777
2client\hASCIZ-parsed\hASCIZ_321-336_output	2client	WT	unknown	ADSSAQPVVLGVDQGS	rank_013	0.78	C-D	1.06591	C	B,3-10	SSAQPVVL	39.139	6.773	12.467		1client\hASCIZ-parsed\hASCIZ_321-336_output	1client	WT	unknown	ADSSAQPVVLGVDQGS	rank_004	0.82	B-C	1.00917	B	A,4-11	SAQPVVLG	29.893	10.034	13.468
2client\hASCIZ-parsed\hASCIZ_321-336_output	2client	WT	unknown	ADSSAQPVVLGVDQGS	rank_013	0.78	C-D	1.06591	D	A,3-10	SSAQPVVL	39.004	6.884	12.617		1client\hASCIZ-parsed\hASCIZ_321-336_output	1client	WT	unknown	ADSSAQPVVLGVDQGS	rank_004	0.82	B-C	1.00917	B	A,4-11	SAQPVVLG	29.893	10.034	13.468
2client\hASCIZ-parsed\hASCIZ_321-336_output	2client	WT	unknown	ADSSAQPVVLGVDQGS	rank_012	0.78	C-D	1.09273	C	A,5-12	AQPVVLGV	39.109	6.908	12.309		1client\hASCIZ-parsed\hASCIZ_321-336_output	1client	WT	unknown	ADSSAQPVVLGVDQGS	rank_017	0.81	B-C	1.07545	C	A,4-11	SAQPVVLG	29.776	10.6	13.654
2client\hASCIZ-parsed\hASCIZ_321-336_output	2client	WT	unknown	ADSSAQPVVLGVDQGS	rank_012	0.78	C-D	1.09273	D	B,5-12	AQPVVLGV	38.961	6.922	12.145		1client\hASCIZ-parsed\hASCIZ_321-336_output	1client	WT	unknown	ADSSAQPVVLGVDQGS	rank_017	0.81	B-C	1.07545	C	A,4-11	SAQPVVLG	29.776	10.6	13.654
2client\hASCIZ-parsed\hASCIZ_321-336_output	2client	WT	unknown	ADSSAQPVVLGVDQGS	rank_016	0.78	C-D	1.03955	C	B,5-12	AQPVVLGV	39.039	7.595	12.644		1client\hASCIZ-parsed\hASCIZ_321-336_output	1client	WT	unknown	ADSSAQPVVLGVDQGS	rank_016	0.81	B-C	1.04077	C	A,5-12	AQPVVLGV	29.702	11.639	14.293
2client\hASCIZ-parsed\hASCIZ_321-336_output	2client	WT	unknown	ADSSAQPVVLGVDQGS	rank_016	0.78	C-D	1.03955	D	A,5-12	AQPVVLGV	38.399	7.669	12.905		1client\hASCIZ-parsed\hASCIZ_321-336_output	1client	WT	unknown	ADSSAQPVVLGVDQGS	rank_016	0.81	B-C	1.04077	C	A,5-12	AQPVVLGV	29.702	11.639	14.293
2client\hASCIZ-parsed\hASCIZ_321-336_output	2client	WT	unknown	ADSSAQPVVLGVDQGS	rank_011	0.79	C-D	1.00091	C	A,5-12	AQPVVLGV	38.91	6.897	11.971		1client\hASCIZ-parsed\hASCIZ_321-336_output	1client	WT	unknown	ADSSAQPVVLGVDQGS	rank_005	0.82	B-C	1.02125	C	A,4-11	SAQPVVLG	29.678	9.966	13.524
2client\hASCIZ-parsed\hASCIZ_321-336_output	2client	WT	unknown	ADSSAQPVVLGVDQGS	rank_011	0.79	C-D	1.00091	D	B,5-12	AQPVVLGV	36.061	7.611	12.703		1client\hASCIZ-parsed\hASCIZ_321-336_output	1client	WT	unknown	ADSSAQPVVLGVDQGS	rank_005	0.82	B-C	1.02125	C	A,4-11	SAQPVVLG	29.678	9.966	13.524
2client\hASCIZ-parsed\hASCIZ_321-336_output	2client	WT	unknown	ADSSAQPVVLGVDQGS	rank_009	0.79	C-D	0.994091	C	B,5-12	AQPVVLGV	38.344	6.978	12.491		1client\hASCIZ-parsed\hASCIZ_321-336_output	1client	WT	unknown	ADSSAQPVVLGVDQGS	rank_014	0.81	B-C	1.04231	B	A,5-12	AQPVVLGV	29.51	10.922	13.992
2client\hASCIZ-parsed\hASCIZ_321-336_output	2client	WT	unknown	ADSSAQPVVLGVDQGS	rank_009	0.79	C-D	0.994091	D	A,5-12	AQPVVLGV	36.784	7.418	12.705		1client\hASCIZ-parsed\hASCIZ_321-336_output	1client	WT	unknown	ADSSAQPVVLGVDQGS	rank_014	0.81	B-C	1.04231	B	A,5-12	AQPVVLGV	29.51	10.922	13.992
2client\hASCIZ-parsed\hASCIZ_321-336_output	2client	WT	unknown	ADSSAQPVVLGVDQGS	rank_017	0.78	C-D	1.00591	D	A,4-11	SAQPVVLG	38.075	7.551	12.686		1client\hASCIZ-parsed\hASCIZ_321-336_output	1client	WT	unknown	ADSSAQPVVLGVDQGS	rank_024	0.79	B-C	1.21591	C	A,5-12	AQPVVLGV	28.97	10.865	13.444
2client\hASCIZ-parsed\hASCIZ_321-336_output	2client	WT	unknown	ADSSAQPVVLGVDQGS	rank_017	0.78	C-D	1.00591	C	B,4-11	SAQPVVLG	35.775	7.855	13.051		1client\hASCIZ-parsed\hASCIZ_321-336_output	1client	WT	unknown	ADSSAQPVVLGVDQGS	rank_024	0.79	B-C	1.21591	C	A,5-12	AQPVVLGV	28.97	10.865	13.444
2client\hASCIZ-parsed\hASCIZ_321-336_output	2client	WT	unknown	ADSSAQPVVLGVDQGS	rank_019	0.77	C-D	1.23607	D	A,6-13	QPVVLGVD	37.977	6.248	11.914		1client\hASCIZ-parsed\hASCIZ_321-336_output	1client	WT	unknown	ADSSAQPVVLGVDQGS	rank_011	0.81	B-C	1.02864	B	A,4-11	SAQPVVLG	28.738	10.551	14.265
2client\hASCIZ-parsed\hASCIZ_321-336_output	2client	WT	unknown	ADSSAQPVVLGVDQGS	rank_019	0.77	C-D	1.23607	C	B,5-12	AQPVVLGV	36.979	6.44	11.987		1client\hASCIZ-parsed\hASCIZ_321-336_output	1client	WT	unknown	ADSSAQPVVLGVDQGS	rank_011	0.81	B-C	1.02864	B	A,4-11	SAQPVVLG	28.738	10.551	14.265
2client\hASCIZ-parsed\hASCIZ_321-336_output	2client	WT	unknown	ADSSAQPVVLGVDQGS	rank_023	0.77	C-D	1.07182	C	A,6-13	QPVVLGVD	37.75	7.601	12.572		1client\hASCIZ-parsed\hASCIZ_321-336_output	1client	WT	unknown	ADSSAQPVVLGVDQGS	rank_012	0.81	B-C	0.983182	C	A,5-12	AQPVVLGV	28.324	10.967	14.708
2client\hASCIZ-parsed\hASCIZ_321-336_output	2client	WT	unknown	ADSSAQPVVLGVDQGS	rank_023	0.77	C-D	1.07182	D	B,6-13	QPVVLGVD	37.658	7.686	12.585		1client\hASCIZ-parsed\hASCIZ_321-336_output	1client	WT	unknown	ADSSAQPVVLGVDQGS	rank_012	0.81	B-C	0.983182	C	A,5-12	AQPVVLGV	28.324	10.967	14.708
2client\hASCIZ-parsed\hASCIZ_321-336_output	2client	WT	unknown	ADSSAQPVVLGVDQGS	rank_021	0.77	C-D	1.24133	C	A,6-13	QPVVLGVD	37.014	6.445	11.857		1client\hASCIZ-parsed\hASCIZ_321-336_output	1client	WT	unknown	ADSSAQPVVLGVDQGS	rank_020	0.8	B-C	1.11636	B	A,4-11	SAQPVVLG	28.155	10.595	13.836
2client\hASCIZ-parsed\hASCIZ_321-336_output	2client	WT	unknown	ADSSAQPVVLGVDQGS	rank_021	0.77	C-D	1.24133	D	B,5-12	AQPVVLGV	35.887	6.474	11.962		1client\hASCIZ-parsed\hASCIZ_321-336_output	1client	WT	unknown	ADSSAQPVVLGVDQGS	rank_020	0.8	B-C	1.11636	B	A,4-11	SAQPVVLG	28.155	10.595	13.836
2client\hASCIZ-parsed\hASCIZ_321-336_output	2client	WT	unknown	ADSSAQPVVLGVDQGS	rank_022	0.77	C-D	1.00923	C	A,5-12	AQPVVLGV	35.51	8.206	12.989		1client\hASCIZ-parsed\hASCIZ_321-336_output	1client	WT	unknown	ADSSAQPVVLGVDQGS	rank_021	0.8	B-C	1.13727	B	A,5-12	AQPVVLGV	24.734	11.612	15.306
2client\hASCIZ-parsed\hASCIZ_321-336_output	2client	WT	unknown	ADSSAQPVVLGVDQGS	rank_022	0.77	C-D	1.00923	D	B,6-13	QPVVLGVD	34.9	8.258	13.298		1client\hASCIZ-parsed\hASCIZ_321-336_output	1client	WT	unknown	ADSSAQPVVLGVDQGS	rank_021	0.8	B-C	1.13727	B	A,5-12	AQPVVLGV	24.734	11.612	15.306
2client\hASCIZ-parsed\hASCIZ_433-448_output	2client	WT	unknown	ADSSVSSCSQTDLSFD	rank_002	0.88	C-D	0.975	C	B,4-11	SVSSCSQT	88.759	1.947	3.863		1client\hASCIZ-parsed\hASCIZ_433-448_output	1client	WT	unknown	ADSSVSSCSQTDLSFD	rank_002	0.86	B-C	1.08909	C	A,5-12	VSSCSQTD	76.783	3.825	6.199
2client\hASCIZ-parsed\hASCIZ_433-448_output	2client	WT	unknown	ADSSVSSCSQTDLSFD	rank_002	0.88	C-D	0.975	D	A,4-11	SVSSCSQT	88.666	1.967	3.899		1client\hASCIZ-parsed\hASCIZ_433-448_output	1client	WT	unknown	ADSSVSSCSQTDLSFD	rank_002	0.86	B-C	1.08909	C	A,5-12	VSSCSQTD	76.783	3.825	6.199
2client\hASCIZ-parsed\hASCIZ_433-448_output	2client	WT	unknown	ADSSVSSCSQTDLSFD	rank_001	0.89	C-D	0.930769	C	B,4-11	SVSSCSQT	88.297	2.198	4.148		1client\hASCIZ-parsed\hASCIZ_433-448_output	1client	WT	unknown	ADSSVSSCSQTDLSFD	rank_001	0.87	B-C	0.975417	C	A,4-11	SVSSCSQT	75.476	4.531	6.95
2client\hASCIZ-parsed\hASCIZ_433-448_output	2client	WT	unknown	ADSSVSSCSQTDLSFD	rank_001	0.89	C-D	0.930769	D	A,4-11	SVSSCSQT	88.117	2.251	4.21		1client\hASCIZ-parsed\hASCIZ_433-448_output	1client	WT	unknown	ADSSVSSCSQTDLSFD	rank_001	0.87	B-C	0.975417	C	A,4-11	SVSSCSQT	75.476	4.531	6.95
2client\hASCIZ-parsed\hASCIZ_433-448_output	2client	WT	unknown	ADSSVSSCSQTDLSFD	rank_003	0.88	C-D	1.02773	C	A,4-11	SVSSCSQT	87.499	1.885	3.76		1client\hASCIZ-parsed\hASCIZ_433-448_output	1client	WT	unknown	ADSSVSSCSQTDLSFD	rank_003	0.86	B-C	1.10318	C	A,5-12	VSSCSQTD	75.321	4.168	6.491
2client\hASCIZ-parsed\hASCIZ_433-448_output	2client	WT	unknown	ADSSVSSCSQTDLSFD	rank_003	0.88	C-D	1.02773	D	B,4-11	SVSSCSQT	87.32	1.902	3.803		1client\hASCIZ-parsed\hASCIZ_433-448_output	1client	WT	unknown	ADSSVSSCSQTDLSFD	rank_003	0.86	B-C	1.10318	C	A,5-12	VSSCSQTD	75.321	4.168	6.491
2client\hASCIZ-parsed\hASCIZ_433-448_output	2client	WT	unknown	ADSSVSSCSQTDLSFD	rank_004	0.87	C-D	1.07227	D	B,4-11	SVSSCSQT	85.811	1.964	4.035		1client\hASCIZ-parsed\hASCIZ_433-448_output	1client	WT	unknown	ADSSVSSCSQTDLSFD	rank_015	0.81	B-C	1.09042	B	A,2-9	DSSVSSCS	44.796	9.893	12.187
2client\hASCIZ-parsed\hASCIZ_433-448_output	2client	WT	unknown	ADSSVSSCSQTDLSFD	rank_004	0.87	C-D	1.07227	C	A,4-11	SVSSCSQT	85.735	1.964	4.07		1client\hASCIZ-parsed\hASCIZ_433-448_output	1client	WT	unknown	ADSSVSSCSQTDLSFD	rank_015	0.81	B-C	1.09042	B	A,2-9	DSSVSSCS	44.796	9.893	12.187
2client\hASCIZ-parsed\hASCIZ_433-448_output	2client	WT	unknown	ADSSVSSCSQTDLSFD	rank_006	0.86	C-D	1.12909	C	A,4-11	SVSSCSQT	85.195	1.931	3.973		1client\hASCIZ-parsed\hASCIZ_433-448_output	1client	WT	unknown	ADSSVSSCSQTDLSFD	rank_004	0.82	B-C	1.00636	C	A,5-12	VSSCSQTD	39.033	8.784	12.84
2client\hASCIZ-parsed\hASCIZ_433-448_output	2client	WT	unknown	ADSSVSSCSQTDLSFD	rank_006	0.86	C-D	1.12909	D	B,4-11	SVSSCSQT	85.125	1.934	4.022		1client\hASCIZ-parsed\hASCIZ_433-448_output	1client	WT	unknown	ADSSVSSCSQTDLSFD	rank_004	0.82	B-C	1.00636	C	A,5-12	VSSCSQTD	39.033	8.784	12.84
2client\hASCIZ-parsed\hASCIZ_433-448_output	2client	WT	unknown	ADSSVSSCSQTDLSFD	rank_005	0.87	C-D	0.965	C	B,4-11	SVSSCSQT	83.321	2.912	5.611		1client\hASCIZ-parsed\hASCIZ_433-448_output	1client	WT	unknown	ADSSVSSCSQTDLSFD	rank_008	0.81	B-C	1.017	C	A,5-12	VSSCSQTD	35.901	10.094	12.811
2client\hASCIZ-parsed\hASCIZ_433-448_output	2client	WT	unknown	ADSSVSSCSQTDLSFD	rank_005	0.87	C-D	0.965	D	A,4-11	SVSSCSQT	82.697	2.967	5.761		1client\hASCIZ-parsed\hASCIZ_433-448_output	1client	WT	unknown	ADSSVSSCSQTDLSFD	rank_008	0.81	B-C	1.017	C	A,5-12	VSSCSQTD	35.901	10.094	12.811
2client\hASCIZ-parsed\hASCIZ_433-448_output	2client	WT	unknown	ADSSVSSCSQTDLSFD	rank_007	0.86	C-D	0.953077	D	B,4-11	SVSSCSQT	80.562	3.806	6.36		1client\hASCIZ-parsed\hASCIZ_433-448_output	1client	WT	unknown	ADSSVSSCSQTDLSFD	rank_016	0.81	B-C	1.05038	C	A,3-10	SSVSSCSQ	35.501	11.086	14.526
2client\hASCIZ-parsed\hASCIZ_433-448_output	2client	WT	unknown	ADSSVSSCSQTDLSFD	rank_007	0.86	C-D	0.953077	C	A,4-11	SVSSCSQT	79.494	3.994	6.603		1client\hASCIZ-parsed\hASCIZ_433-448_output	1client	WT	unknown	ADSSVSSCSQTDLSFD	rank_016	0.81	B-C	1.05038	C	A,3-10	SSVSSCSQ	35.501	11.086	14.526
2client\hASCIZ-parsed\hASCIZ_433-448_output	2client	WT	unknown	ADSSVSSCSQTDLSFD	rank_010	0.85	C-D	1.10409	C	B,5-12	VSSCSQTD	79.11	2.854	5.601		1client\hASCIZ-parsed\hASCIZ_433-448_output	1client	WT	unknown	ADSSVSSCSQTDLSFD	rank_017	0.81	B-C	1.10955	B	A,4-11	SVSSCSQT	34.34	8.491	13.364
2client\hASCIZ-parsed\hASCIZ_433-448_output	2client	WT	unknown	ADSSVSSCSQTDLSFD	rank_010	0.85	C-D	1.10409	D	A,5-12	VSSCSQTD	79.086	2.839	5.583		1client\hASCIZ-parsed\hASCIZ_433-448_output	1client	WT	unknown	ADSSVSSCSQTDLSFD	rank_017	0.81	B-C	1.10955	B	A,4-11	SVSSCSQT	34.34	8.491	13.364
2client\hASCIZ-parsed\hASCIZ_433-448_output	2client	WT	unknown	ADSSVSSCSQTDLSFD	rank_009	0.85	C-D	0.950769	C	A,4-11	SVSSCSQT	78.588	4.275	6.851		1client\hASCIZ-parsed\hASCIZ_433-448_output	1client	WT	unknown	ADSSVSSCSQTDLSFD	rank_006	0.82	B-C	1.0205	B	A,5-12	VSSCSQTD	33.726	9.326	13.102
2client\hASCIZ-parsed\hASCIZ_433-448_output	2client	WT	unknown	ADSSVSSCSQTDLSFD	rank_009	0.85	C-D	0.950769	D	B,4-11	SVSSCSQT	78.586	4.212	6.872		1client\hASCIZ-parsed\hASCIZ_433-448_output	1client	WT	unknown	ADSSVSSCSQTDLSFD	rank_006	0.82	B-C	1.0205	B	A,5-12	VSSCSQTD	33.726	9.326	13.102
2client\hASCIZ-parsed\hASCIZ_433-448_output	2client	WT	unknown	ADSSVSSCSQTDLSFD	rank_008	0.86	C-D	0.973182	C	B,5-12	VSSCSQTD	78.555	3.768	6.831		1client\hASCIZ-parsed\hASCIZ_433-448_output	1client	WT	unknown	ADSSVSSCSQTDLSFD	rank_020	0.81	B-C	1.17182	C	A,4-11	SVSSCSQT	32.709	8.698	12.651
2client\hASCIZ-parsed\hASCIZ_433-448_output	2client	WT	unknown	ADSSVSSCSQTDLSFD	rank_008	0.86	C-D	0.973182	D	A,5-12	VSSCSQTD	78.507	3.805	6.857		1client\hASCIZ-parsed\hASCIZ_433-448_output	1client	WT	unknown	ADSSVSSCSQTDLSFD	rank_020	0.81	B-C	1.17182	C	A,4-11	SVSSCSQT	32.709	8.698	12.651
2client\hASCIZ-parsed\hASCIZ_433-448_output	2client	WT	unknown	ADSSVSSCSQTDLSFD	rank_012	0.83	C-D	1.16923	D	B,5-12	VSSCSQTD	75.312	3.125	6.274		1client\hASCIZ-parsed\hASCIZ_433-448_output	1client	WT	unknown	ADSSVSSCSQTDLSFD	rank_005	0.82	B-C	0.993182	C	A,3-10	SSVSSCSQ	31.62	9.418	13.774
2client\hASCIZ-parsed\hASCIZ_433-448_output	2client	WT	unknown	ADSSVSSCSQTDLSFD	rank_012	0.83	C-D	1.16923	C	A,5-12	VSSCSQTD	75.05	3.159	6.339		1client\hASCIZ-parsed\hASCIZ_433-448_output	1client	WT	unknown	ADSSVSSCSQTDLSFD	rank_005	0.82	B-C	0.993182	C	A,3-10	SSVSSCSQ	31.62	9.418	13.774
2client\hASCIZ-parsed\hASCIZ_433-448_output	2client	WT	unknown	ADSSVSSCSQTDLSFD	rank_011	0.85	C-D	0.993077	C	A,5-12	VSSCSQTD	75.29	4.113	7.705		1client\hASCIZ-parsed\hASCIZ_433-448_output	1client	WT	unknown	ADSSVSSCSQTDLSFD	rank_012	0.81	B-C	1.0165	B	A,5-12	VSSCSQTD	31.481	10.055	13.431
2client\hASCIZ-parsed\hASCIZ_433-448_output	2client	WT	unknown	ADSSVSSCSQTDLSFD	rank_011	0.85	C-D	0.993077	D	B,5-12	VSSCSQTD	75.257	3.822	7.337		1client\hASCIZ-parsed\hASCIZ_433-448_output	1client	WT	unknown	ADSSVSSCSQTDLSFD	rank_012	0.81	B-C	1.0165	B	A,5-12	VSSCSQTD	31.481	10.055	13.431
2client\hASCIZ-parsed\hASCIZ_433-448_output	2client	WT	unknown	ADSSVSSCSQTDLSFD	rank_013	0.83	C-D	1.02885	C	A,4-11	SVSSCSQT	73.551	4.755	8.185		1client\hASCIZ-parsed\hASCIZ_433-448_output	1client	WT	unknown	ADSSVSSCSQTDLSFD	rank_022	0.8	B-C	1.074	C	A,3-10	SSVSSCSQ	30.242	11.297	14.841
2client\hASCIZ-parsed\hASCIZ_433-448_output	2client	WT	unknown	ADSSVSSCSQTDLSFD	rank_013	0.83	C-D	1.02885	D	B,4-11	SVSSCSQT	73.354	4.719	8.195		1client\hASCIZ-parsed\hASCIZ_433-448_output	1client	WT	unknown	ADSSVSSCSQTDLSFD	rank_022	0.8	B-C	1.074	C	A,3-10	SSVSSCSQ	30.242	11.297	14.841
2client\hASCIZ-parsed\hASCIZ_433-448_output	2client	WT	unknown	ADSSVSSCSQTDLSFD	rank_016	0.82	C-D	1.21	D	A,5-12	VSSCSQTD	73.307	3.201	6.585		1client\hASCIZ-parsed\hASCIZ_433-448_output	1client	WT	unknown	ADSSVSSCSQTDLSFD	rank_018	0.81	B-C	1.04864	C	A,3-10	SSVSSCSQ	29.83	10.232	14.18
2client\hASCIZ-parsed\hASCIZ_433-448_output	2client	WT	unknown	ADSSVSSCSQTDLSFD	rank_016	0.82	C-D	1.21	C	B,5-12	VSSCSQTD	72.059	3.332	6.766		1client\hASCIZ-parsed\hASCIZ_433-448_output	1client	WT	unknown	ADSSVSSCSQTDLSFD	rank_018	0.81	B-C	1.04864	C	A,3-10	SSVSSCSQ	29.83	10.232	14.18
2client\hASCIZ-parsed\hASCIZ_433-448_output	2client	WT	unknown	ADSSVSSCSQTDLSFD	rank_015	0.82	C-D	1.0675	D	B,4-11	SVSSCSQT	72.168	4.641	8.303		1client\hASCIZ-parsed\hASCIZ_433-448_output	1client	WT	unknown	ADSSVSSCSQTDLSFD	rank_010	0.81	B-C	0.990769	C	A,3-10	SSVSSCSQ	29.13	11.566	15.601
2client\hASCIZ-parsed\hASCIZ_433-448_output	2client	WT	unknown	ADSSVSSCSQTDLSFD	rank_015	0.82	C-D	1.0675	C	A,4-11	SVSSCSQT	69.918	4.817	8.621		1client\hASCIZ-parsed\hASCIZ_433-448_output	1client	WT	unknown	ADSSVSSCSQTDLSFD	rank_010	0.81	B-C	0.990769	C	A,3-10	SSVSSCSQ	29.13	11.566	15.601
2client\hASCIZ-parsed\hASCIZ_433-448_output	2client	WT	unknown	ADSSVSSCSQTDLSFD	rank_017	0.81	C-D	1.20654	C	B,5-12	VSSCSQTD	70.27	4.113	7.485		1client\hASCIZ-parsed\hASCIZ_433-448_output	1client	WT	unknown	ADSSVSSCSQTDLSFD	rank_019	0.81	B-C	1.0145	C	A,2-9	DSSVSSCS	29.101	11.133	14.818
2client\hASCIZ-parsed\hASCIZ_433-448_output	2client	WT	unknown	ADSSVSSCSQTDLSFD	rank_017	0.81	C-D	1.20654	D	A,5-12	VSSCSQTD	70.025	4.092	7.605		1client\hASCIZ-parsed\hASCIZ_433-448_output	1client	WT	unknown	ADSSVSSCSQTDLSFD	rank_019	0.81	B-C	1.0145	C	A,2-9	DSSVSSCS	29.101	11.133	14.818
2client\hASCIZ-parsed\hASCIZ_433-448_output	2client	WT	unknown	ADSSVSSCSQTDLSFD	rank_014	0.83	C-D	1.085	D	B,4-11	SVSSCSQT	59.089	4.063	8.998		1client\hASCIZ-parsed\hASCIZ_433-448_output	1client	WT	unknown	ADSSVSSCSQTDLSFD	rank_021	0.81	B-C	1.05045	B	A,3-10	SSVSSCSQ	28.834	10.718	14.044
2client\hASCIZ-parsed\hASCIZ_433-448_output	2client	WT	unknown	ADSSVSSCSQTDLSFD	rank_014	0.83	C-D	1.085	C	A,4-11	SVSSCSQT	55.619	4.535	9.857		1client\hASCIZ-parsed\hASCIZ_433-448_output	1client	WT	unknown	ADSSVSSCSQTDLSFD	rank_021	0.81	B-C	1.05045	B	A,3-10	SSVSSCSQ	28.834	10.718	14.044
2client\hASCIZ-parsed\hASCIZ_433-448_output	2client	WT	unknown	ADSSVSSCSQTDLSFD	rank_019	0.8	C-D	0.981154	D	B,4-11	SVSSCSQT	57.863	6.99	10.47		1client\hASCIZ-parsed\hASCIZ_433-448_output	1client	WT	unknown	ADSSVSSCSQTDLSFD	rank_007	0.81	B-C	0.993077	C	A,3-10	SSVSSCSQ	28.458	11.734	15.805
2client\hASCIZ-parsed\hASCIZ_433-448_output	2client	WT	unknown	ADSSVSSCSQTDLSFD	rank_019	0.8	C-D	0.981154	C	A,4-11	SVSSCSQT	55.711	7.131	10.69		1client\hASCIZ-parsed\hASCIZ_433-448_output	1client	WT	unknown	ADSSVSSCSQTDLSFD	rank_007	0.81	B-C	0.993077	C	A,3-10	SSVSSCSQ	28.458	11.734	15.805
2client\hASCIZ-parsed\hASCIZ_433-448_output	2client	WT	unknown	ADSSVSSCSQTDLSFD	rank_021	0.79	C-D	1.0245	C	A,5-12	VSSCSQTD	57.461	6.072	10.398		1client\hASCIZ-parsed\hASCIZ_433-448_output	1client	WT	unknown	ADSSVSSCSQTDLSFD	rank_013	0.81	B-C	0.984545	C	A,2-9	DSSVSSCS	27.835	10.832	14.673
2client\hASCIZ-parsed\hASCIZ_433-448_output	2client	WT	unknown	ADSSVSSCSQTDLSFD	rank_021	0.79	C-D	1.0245	D	B,4-11	SVSSCSQT	55.695	6.561	10.501		1client\hASCIZ-parsed\hASCIZ_433-448_output	1client	WT	unknown	ADSSVSSCSQTDLSFD	rank_013	0.81	B-C	0.984545	C	A,2-9	DSSVSSCS	27.835	10.832	14.673
2client\hASCIZ-parsed\hASCIZ_433-448_output	2client	WT	unknown	ADSSVSSCSQTDLSFD	rank_018	0.81	C-D	1.12227	D	A,5-12	VSSCSQTD	48.773	5.264	11.186		1client\hASCIZ-parsed\hASCIZ_433-448_output	1client	WT	unknown	ADSSVSSCSQTDLSFD	rank_025	0.8	B-C	1.12318	C	A,4-11	SVSSCSQT	27.491	11.445	15.129
2client\hASCIZ-parsed\hASCIZ_433-448_output	2client	WT	unknown	ADSSVSSCSQTDLSFD	rank_018	0.81	C-D	1.12227	C	B,5-12	VSSCSQTD	48.564	5.266	11.193		1client\hASCIZ-parsed\hASCIZ_433-448_output	1client	WT	unknown	ADSSVSSCSQTDLSFD	rank_025	0.8	B-C	1.12318	C	A,4-11	SVSSCSQT	27.491	11.445	15.129
2client\hASCIZ-parsed\hASCIZ_433-448_output	2client	WT	unknown	ADSSVSSCSQTDLSFD	rank_020	0.8	C-D	0.982083	D	A,5-12	VSSCSQTD	46.589	6.367	11.008		1client\hASCIZ-parsed\hASCIZ_433-448_output	1client	WT	unknown	ADSSVSSCSQTDLSFD	rank_024	0.8	B-C	1.06	B	A,3-10	SSVSSCSQ	26.662	11.966	15.526
2client\hASCIZ-parsed\hASCIZ_433-448_output	2client	WT	unknown	ADSSVSSCSQTDLSFD	rank_020	0.8	C-D	0.982083	C	B,4-11	SVSSCSQT	44.874	8.066	11.885		1client\hASCIZ-parsed\hASCIZ_433-448_output	1client	WT	unknown	ADSSVSSCSQTDLSFD	rank_024	0.8	B-C	1.06	B	A,3-10	SSVSSCSQ	26.662	11.966	15.526
2client\hASCIZ-parsed\hASCIZ_433-448_output	2client	WT	unknown	ADSSVSSCSQTDLSFD	rank_023	0.78	C-D	1.01227	C	A,6-13	SSCSQTDL	41.948	7.28	12.232		1client\hASCIZ-parsed\hASCIZ_433-448_output	1client	WT	unknown	ADSSVSSCSQTDLSFD	rank_023	0.8	B-C	1.02955	B	A,3-10	SSVSSCSQ	26.657	11.747	14.71
2client\hASCIZ-parsed\hASCIZ_433-448_output	2client	WT	unknown	ADSSVSSCSQTDLSFD	rank_023	0.78	C-D	1.01227	D	B,6-13	SSCSQTDL	40.972	7.484	12.49		1client\hASCIZ-parsed\hASCIZ_433-448_output	1client	WT	unknown	ADSSVSSCSQTDLSFD	rank_023	0.8	B-C	1.02955	B	A,3-10	SSVSSCSQ	26.657	11.747	14.71
2client\hASCIZ-parsed\hASCIZ_433-448_output	2client	WT	unknown	ADSSVSSCSQTDLSFD	rank_024	0.78	C-D	1.0275	C	B,4-11	SVSSCSQT	40.801	7.017	11.97		1client\hASCIZ-parsed\hASCIZ_433-448_output	1client	WT	unknown	ADSSVSSCSQTDLSFD	rank_011	0.81	B-C	0.985769	B	A,4-11	SVSSCSQT	26.258	11.491	15.887
2client\hASCIZ-parsed\hASCIZ_433-448_output	2client	WT	unknown	ADSSVSSCSQTDLSFD	rank_024	0.78	C-D	1.0275	D	A,4-11	SVSSCSQT	39.199	7.105	12.382		1client\hASCIZ-parsed\hASCIZ_433-448_output	1client	WT	unknown	ADSSVSSCSQTDLSFD	rank_011	0.81	B-C	0.985769	B	A,4-11	SVSSCSQT	26.258	11.491	15.887
2client\hASCIZ-parsed\hASCIZ_433-448_output	2client	WT	unknown	ADSSVSSCSQTDLSFD	rank_022	0.78	C-D	1.025	C	B,4-11	SVSSCSQT	37.585	7.147	12.225		1client\hASCIZ-parsed\hASCIZ_433-448_output	1client	WT	unknown	ADSSVSSCSQTDLSFD	rank_014	0.81	B-C	1.00077	C	A,4-11	SVSSCSQT	26.009	11.686	16.344
2client\hASCIZ-parsed\hASCIZ_433-448_output	2client	WT	unknown	ADSSVSSCSQTDLSFD	rank_022	0.78	C-D	1.025	D	A,4-11	SVSSCSQT	36.553	7.219	12.496		1client\hASCIZ-parsed\hASCIZ_433-448_output	1client	WT	unknown	ADSSVSSCSQTDLSFD	rank_014	0.81	B-C	1.00077	C	A,4-11	SVSSCSQT	26.009	11.686	16.344
2client\hASCIZ-parsed\hASCIZ_433-448_output	2client	WT	unknown	ADSSVSSCSQTDLSFD	rank_025	0.78	C-D	0.976364	C	B,4-11	SVSSCSQT	36.574	7.815	12.546		1client\hASCIZ-parsed\hASCIZ_433-448_output	1client	WT	unknown	ADSSVSSCSQTDLSFD	rank_009	0.81	B-C	0.964545	C	A,4-11	SVSSCSQT	24.727	12.068	15.708
2client\hASCIZ-parsed\hASCIZ_433-448_output	2client	WT	unknown	ADSSVSSCSQTDLSFD	rank_025	0.78	C-D	0.976364	D	A,4-11	SVSSCSQT	33.987	8.645	12.914		1client\hASCIZ-parsed\hASCIZ_433-448_output	1client	WT	unknown	ADSSVSSCSQTDLSFD	rank_009	0.81	B-C	0.964545	C	A,4-11	SVSSCSQT	24.727	12.068	15.708
postGMF-runs\2client\WT_analysis\more_scans\WWC3\WWC3_929-944_output	2client	WT	unknown	AEAISERSWQADSVDS	rank_001	0.83	C-D	1.05667	D	A,5-12	SERSWQAD	69.829	5.51	8.203		postGMF-runs\1client\WT_analysis\more_scans\WWC3\WWC3_929-944_output	1client	WT	unknown	AEAISERSWQADSVDS	rank_002	0.84	B-C	1.02885	C	A,5-12	SERSWQAD	56.658	8.099	10.44
postGMF-runs\2client\WT_analysis\more_scans\WWC3\WWC3_929-944_output	2client	WT	unknown	AEAISERSWQADSVDS	rank_001	0.83	C-D	1.05667	C	B,5-12	SERSWQAD	69.647	5.578	8.24		postGMF-runs\1client\WT_analysis\more_scans\WWC3\WWC3_929-944_output	1client	WT	unknown	AEAISERSWQADSVDS	rank_002	0.84	B-C	1.02885	C	A,5-12	SERSWQAD	56.658	8.099	10.44
postGMF-runs\2client\WT_analysis\more_scans\WWC3\WWC3_929-944_output	2client	WT	unknown	AEAISERSWQADSVDS	rank_002	0.82	C-D	1.00808	D	B,4-11	ISERSWQA	69.796	6.003	8.225		postGMF-runs\1client\WT_analysis\more_scans\WWC3\WWC3_929-944_output	1client	WT	unknown	AEAISERSWQADSVDS	rank_005	0.82	B-C	1.03667	B	A,4-11	ISERSWQA	50.785	9.352	11.731
postGMF-runs\2client\WT_analysis\more_scans\WWC3\WWC3_929-944_output	2client	WT	unknown	AEAISERSWQADSVDS	rank_002	0.82	C-D	1.00808	C	A,5-12	SERSWQAD	65.722	6.321	8.832		postGMF-runs\1client\WT_analysis\more_scans\WWC3\WWC3_929-944_output	1client	WT	unknown	AEAISERSWQADSVDS	rank_005	0.82	B-C	1.03667	B	A,4-11	ISERSWQA	50.785	9.352	11.731
postGMF-runs\2client\WT_analysis\more_scans\WWC3\WWC3_929-944_output	2client	WT	unknown	AEAISERSWQADSVDS	rank_003	0.82	C-D	1.1275	D	B,5-12	SERSWQAD	63.855	5.862	8.998		postGMF-runs\1client\WT_analysis\more_scans\WWC3\WWC3_929-944_output	1client	WT	unknown	AEAISERSWQADSVDS	rank_004	0.83	B-C	1.03167	C	A,4-11	ISERSWQA	49.938	9.782	11.823
postGMF-runs\2client\WT_analysis\more_scans\WWC3\WWC3_929-944_output	2client	WT	unknown	AEAISERSWQADSVDS	rank_003	0.82	C-D	1.1275	C	A,5-12	SERSWQAD	62.731	5.923	9.082		postGMF-runs\1client\WT_analysis\more_scans\WWC3\WWC3_929-944_output	1client	WT	unknown	AEAISERSWQADSVDS	rank_004	0.83	B-C	1.03167	C	A,4-11	ISERSWQA	49.938	9.782	11.823
postGMF-runs\2client\WT_analysis\more_scans\WWC3\WWC3_929-944_output	2client	WT	unknown	AEAISERSWQADSVDS	rank_010	0.79	C-D	1.11	C	B,5-12	SERSWQAD	62.689	6.685	9.826		postGMF-runs\1client\WT_analysis\more_scans\WWC3\WWC3_929-944_output	1client	WT	unknown	AEAISERSWQADSVDS	rank_001	0.84	B-C	1.04409	B	A,5-12	SERSWQAD	49.043	9.445	11.007
postGMF-runs\2client\WT_analysis\more_scans\WWC3\WWC3_929-944_output	2client	WT	unknown	AEAISERSWQADSVDS	rank_010	0.79	C-D	1.11	D	A,5-12	SERSWQAD	56.781	7.655	10.777		postGMF-runs\1client\WT_analysis\more_scans\WWC3\WWC3_929-944_output	1client	WT	unknown	AEAISERSWQADSVDS	rank_001	0.84	B-C	1.04409	B	A,5-12	SERSWQAD	49.043	9.445	11.007
postGMF-runs\2client\WT_analysis\more_scans\WWC3\WWC3_929-944_output	2client	WT	unknown	AEAISERSWQADSVDS	rank_004	0.82	C-D	1.2	C	A,6-13	ERSWQADS	62.454	5.654	9.722		postGMF-runs\1client\WT_analysis\more_scans\WWC3\WWC3_929-944_output	1client	WT	unknown	AEAISERSWQADSVDS	rank_008	0.82	B-C	1.065	B	A,4-11	ISERSWQA	48.754	9.372	11.701
postGMF-runs\2client\WT_analysis\more_scans\WWC3\WWC3_929-944_output	2client	WT	unknown	AEAISERSWQADSVDS	rank_004	0.82	C-D	1.2	D	B,6-13	ERSWQADS	61.454	5.719	9.865		postGMF-runs\1client\WT_analysis\more_scans\WWC3\WWC3_929-944_output	1client	WT	unknown	AEAISERSWQADSVDS	rank_008	0.82	B-C	1.065	B	A,4-11	ISERSWQA	48.754	9.372	11.701
postGMF-runs\2client\WT_analysis\more_scans\WWC3\WWC3_929-944_output	2client	WT	unknown	AEAISERSWQADSVDS	rank_008	0.79	C-D	1.0725	C	A,5-12	SERSWQAD	61.246	7.06	10.383		postGMF-runs\1client\WT_analysis\more_scans\WWC3\WWC3_929-944_output	1client	WT	unknown	AEAISERSWQADSVDS	rank_006	0.82	B-C	1.091	B	A,5-12	SERSWQAD	45.449	9.34	11.374
postGMF-runs\2client\WT_analysis\more_scans\WWC3\WWC3_929-944_output	2client	WT	unknown	AEAISERSWQADSVDS	rank_008	0.79	C-D	1.0725	D	B,5-12	SERSWQAD	58.458	7.464	10.79		postGMF-runs\1client\WT_analysis\more_scans\WWC3\WWC3_929-944_output	1client	WT	unknown	AEAISERSWQADSVDS	rank_006	0.82	B-C	1.091	B	A,5-12	SERSWQAD	45.449	9.34	11.374
postGMF-runs\2client\WT_analysis\more_scans\WWC3\WWC3_929-944_output	2client	WT	unknown	AEAISERSWQADSVDS	rank_011	0.79	C-D	1.28227	D	B,5-12	SERSWQAD	59.106	5.86	9.475		postGMF-runs\1client\WT_analysis\more_scans\WWC3\WWC3_929-944_output	1client	WT	unknown	AEAISERSWQADSVDS	rank_010	0.82	B-C	1.10909	B	A,5-12	SERSWQAD	42.683	9.594	11.894
postGMF-runs\2client\WT_analysis\more_scans\WWC3\WWC3_929-944_output	2client	WT	unknown	AEAISERSWQADSVDS	rank_011	0.79	C-D	1.28227	C	A,5-12	SERSWQAD	56.063	6.12	9.871		postGMF-runs\1client\WT_analysis\more_scans\WWC3\WWC3_929-944_output	1client	WT	unknown	AEAISERSWQADSVDS	rank_010	0.82	B-C	1.10909	B	A,5-12	SERSWQAD	42.683	9.594	11.894
postGMF-runs\2client\WT_analysis\more_scans\WWC3\WWC3_929-944_output	2client	WT	unknown	AEAISERSWQADSVDS	rank_009	0.8	C-D	1.265	C	A,6-13	ERSWQADS	58.379	6.005	10.283		postGMF-runs\1client\WT_analysis\more_scans\WWC3\WWC3_929-944_output	1client	WT	unknown	AEAISERSWQADSVDS	rank_017	0.81	B-C	1.03462	C	A,4-11	ISERSWQA	41.719	10.331	12.672
postGMF-runs\2client\WT_analysis\more_scans\WWC3\WWC3_929-944_output	2client	WT	unknown	AEAISERSWQADSVDS	rank_009	0.8	C-D	1.265	D	B,6-13	ERSWQADS	57.864	6.058	10.313		postGMF-runs\1client\WT_analysis\more_scans\WWC3\WWC3_929-944_output	1client	WT	unknown	AEAISERSWQADSVDS	rank_017	0.81	B-C	1.03462	C	A,4-11	ISERSWQA	41.719	10.331	12.672
postGMF-runs\2client\WT_analysis\more_scans\WWC3\WWC3_929-944_output	2client	WT	unknown	AEAISERSWQADSVDS	rank_005	0.81	C-D	1.07077	D	B,5-12	SERSWQAD	57.613	6.748	10.266		postGMF-runs\1client\WT_analysis\more_scans\WWC3\WWC3_929-944_output	1client	WT	unknown	AEAISERSWQADSVDS	rank_018	0.81	B-C	1.09958	B	A,6-13	ERSWQADS	38.771	10.346	13.092
postGMF-runs\2client\WT_analysis\more_scans\WWC3\WWC3_929-944_output	2client	WT	unknown	AEAISERSWQADSVDS	rank_005	0.81	C-D	1.07077	C	A,5-12	SERSWQAD	56.454	6.833	10.428		postGMF-runs\1client\WT_analysis\more_scans\WWC3\WWC3_929-944_output	1client	WT	unknown	AEAISERSWQADSVDS	rank_018	0.81	B-C	1.09958	B	A,6-13	ERSWQADS	38.771	10.346	13.092
postGMF-runs\2client\WT_analysis\more_scans\WWC3\WWC3_929-944_output	2client	WT	unknown	AEAISERSWQADSVDS	rank_006	0.81	C-D	1.08654	D	B,6-13	ERSWQADS	56.259	6.917	11.049		postGMF-runs\1client\WT_analysis\more_scans\WWC3\WWC3_929-944_output	1client	WT	unknown	AEAISERSWQADSVDS	rank_013	0.82	B-C	1.02667	C	A,5-12	SERSWQAD	37.078	10.436	13.078
postGMF-runs\2client\WT_analysis\more_scans\WWC3\WWC3_929-944_output	2client	WT	unknown	AEAISERSWQADSVDS	rank_006	0.81	C-D	1.08654	C	A,6-13	ERSWQADS	53.329	7.303	11.529		postGMF-runs\1client\WT_analysis\more_scans\WWC3\WWC3_929-944_output	1client	WT	unknown	AEAISERSWQADSVDS	rank_013	0.82	B-C	1.02667	C	A,5-12	SERSWQAD	37.078	10.436	13.078
postGMF-runs\2client\WT_analysis\more_scans\WWC3\WWC3_929-944_output	2client	WT	unknown	AEAISERSWQADSVDS	rank_016	0.78	C-D	1.09792	C	A,5-12	SERSWQAD	53.609	8.274	11.523		postGMF-runs\1client\WT_analysis\more_scans\WWC3\WWC3_929-944_output	1client	WT	unknown	AEAISERSWQADSVDS	rank_016	0.82	B-C	1.01731	C	A,4-11	ISERSWQA	35.53	10.364	13.305
postGMF-runs\2client\WT_analysis\more_scans\WWC3\WWC3_929-944_output	2client	WT	unknown	AEAISERSWQADSVDS	rank_016	0.78	C-D	1.09792	D	B,5-12	SERSWQAD	53.113	8.49	11.65		postGMF-runs\1client\WT_analysis\more_scans\WWC3\WWC3_929-944_output	1client	WT	unknown	AEAISERSWQADSVDS	rank_016	0.82	B-C	1.01731	C	A,4-11	ISERSWQA	35.53	10.364	13.305
postGMF-runs\2client\WT_analysis\more_scans\WWC3\WWC3_929-944_output	2client	WT	unknown	AEAISERSWQADSVDS	rank_018	0.77	C-D	1.28545	D	A,5-12	SERSWQAD	52.532	7.824	11.065		postGMF-runs\1client\WT_analysis\more_scans\WWC3\WWC3_929-944_output	1client	WT	unknown	AEAISERSWQADSVDS	rank_011	0.82	B-C	0.993182	B	A,4-11	ISERSWQA	35.005	10.772	13.586
postGMF-runs\2client\WT_analysis\more_scans\WWC3\WWC3_929-944_output	2client	WT	unknown	AEAISERSWQADSVDS	rank_018	0.77	C-D	1.28545	C	B,5-12	SERSWQAD	51.301	8.117	11.328		postGMF-runs\1client\WT_analysis\more_scans\WWC3\WWC3_929-944_output	1client	WT	unknown	AEAISERSWQADSVDS	rank_011	0.82	B-C	0.993182	B	A,4-11	ISERSWQA	35.005	10.772	13.586
postGMF-runs\2client\WT_analysis\more_scans\WWC3\WWC3_929-944_output	2client	WT	unknown	AEAISERSWQADSVDS	rank_015	0.78	C-D	1.03773	D	B,5-12	SERSWQAD	52.151	9.185	12.402		postGMF-runs\1client\WT_analysis\more_scans\WWC3\WWC3_929-944_output	1client	WT	unknown	AEAISERSWQADSVDS	rank_020	0.81	B-C	1.04273	B	A,5-12	SERSWQAD	33.5	10.977	13.855
postGMF-runs\2client\WT_analysis\more_scans\WWC3\WWC3_929-944_output	2client	WT	unknown	AEAISERSWQADSVDS	rank_015	0.78	C-D	1.03773	C	A,5-12	SERSWQAD	48.924	9.696	12.964		postGMF-runs\1client\WT_analysis\more_scans\WWC3\WWC3_929-944_output	1client	WT	unknown	AEAISERSWQADSVDS	rank_020	0.81	B-C	1.04273	B	A,5-12	SERSWQAD	33.5	10.977	13.855
postGMF-runs\2client\WT_analysis\more_scans\WWC3\WWC3_929-944_output	2client	WT	unknown	AEAISERSWQADSVDS	rank_007	0.8	C-D	0.993846	D	B,5-12	SERSWQAD	51.411	5.833	9.578		postGMF-runs\1client\WT_analysis\more_scans\WWC3\WWC3_929-944_output	1client	WT	unknown	AEAISERSWQADSVDS	rank_003	0.83	B-C	0.98375	C	A,5-12	SERSWQAD	31.69	10.485	13.973
postGMF-runs\2client\WT_analysis\more_scans\WWC3\WWC3_929-944_output	2client	WT	unknown	AEAISERSWQADSVDS	rank_007	0.8	C-D	0.993846	C	A,5-12	SERSWQAD	45.551	6.575	10.786		postGMF-runs\1client\WT_analysis\more_scans\WWC3\WWC3_929-944_output	1client	WT	unknown	AEAISERSWQADSVDS	rank_003	0.83	B-C	0.98375	C	A,5-12	SERSWQAD	31.69	10.485	13.973
postGMF-runs\2client\WT_analysis\more_scans\WWC3\WWC3_929-944_output	2client	WT	unknown	AEAISERSWQADSVDS	rank_013	0.78	C-D	1.21792	C	A,5-12	SERSWQAD	49.921	6.948	11.112		postGMF-runs\1client\WT_analysis\more_scans\WWC3\WWC3_929-944_output	1client	WT	unknown	AEAISERSWQADSVDS	rank_009	0.82	B-C	0.985417	C	A,5-12	SERSWQAD	31.551	9.638	13.598
postGMF-runs\2client\WT_analysis\more_scans\WWC3\WWC3_929-944_output	2client	WT	unknown	AEAISERSWQADSVDS	rank_013	0.78	C-D	1.21792	D	B,5-12	SERSWQAD	49.499	7.016	11.236		postGMF-runs\1client\WT_analysis\more_scans\WWC3\WWC3_929-944_output	1client	WT	unknown	AEAISERSWQADSVDS	rank_009	0.82	B-C	0.985417	C	A,5-12	SERSWQAD	31.551	9.638	13.598
postGMF-runs\2client\WT_analysis\more_scans\WWC3\WWC3_929-944_output	2client	WT	unknown	AEAISERSWQADSVDS	rank_012	0.78	C-D	1.18136	C	A,6-13	ERSWQADS	48.895	7.701	12.182		postGMF-runs\1client\WT_analysis\more_scans\WWC3\WWC3_929-944_output	1client	WT	unknown	AEAISERSWQADSVDS	rank_019	0.81	B-C	0.969	B	A,5-12	SERSWQAD	31.309	11.894	14.953
postGMF-runs\2client\WT_analysis\more_scans\WWC3\WWC3_929-944_output	2client	WT	unknown	AEAISERSWQADSVDS	rank_012	0.78	C-D	1.18136	D	B,6-13	ERSWQADS	47.471	7.862	12.388		postGMF-runs\1client\WT_analysis\more_scans\WWC3\WWC3_929-944_output	1client	WT	unknown	AEAISERSWQADSVDS	rank_019	0.81	B-C	0.969	B	A,5-12	SERSWQAD	31.309	11.894	14.953
postGMF-runs\2client\WT_analysis\more_scans\WWC3\WWC3_929-944_output	2client	WT	unknown	AEAISERSWQADSVDS	rank_017	0.77	C-D	1.2	D	B,5-12	SERSWQAD	48.338	8.336	11.907		postGMF-runs\1client\WT_analysis\more_scans\WWC3\WWC3_929-944_output	1client	WT	unknown	AEAISERSWQADSVDS	rank_012	0.82	B-C	1.00409	B	A,5-12	SERSWQAD	31.111	9.764	13.693
postGMF-runs\2client\WT_analysis\more_scans\WWC3\WWC3_929-944_output	2client	WT	unknown	AEAISERSWQADSVDS	rank_017	0.77	C-D	1.2	C	A,5-12	SERSWQAD	47.195	8.378	11.961		postGMF-runs\1client\WT_analysis\more_scans\WWC3\WWC3_929-944_output	1client	WT	unknown	AEAISERSWQADSVDS	rank_012	0.82	B-C	1.00409	B	A,5-12	SERSWQAD	31.111	9.764	13.693
postGMF-runs\2client\WT_analysis\more_scans\WWC3\WWC3_929-944_output	2client	WT	unknown	AEAISERSWQADSVDS	rank_020	0.77	C-D	1.1575	D	B,5-12	SERSWQAD	44.425	8.805	12.351		postGMF-runs\1client\WT_analysis\more_scans\WWC3\WWC3_929-944_output	1client	WT	unknown	AEAISERSWQADSVDS	rank_015	0.82	B-C	0.979167	C	A,5-12	SERSWQAD	30.925	11.044	14.522
postGMF-runs\2client\WT_analysis\more_scans\WWC3\WWC3_929-944_output	2client	WT	unknown	AEAISERSWQADSVDS	rank_020	0.77	C-D	1.1575	C	A,5-12	SERSWQAD	44.304	8.724	12.344		postGMF-runs\1client\WT_analysis\more_scans\WWC3\WWC3_929-944_output	1client	WT	unknown	AEAISERSWQADSVDS	rank_015	0.82	B-C	0.979167	C	A,5-12	SERSWQAD	30.925	11.044	14.522
postGMF-runs\2client\WT_analysis\more_scans\WWC3\WWC3_929-944_output	2client	WT	unknown	AEAISERSWQADSVDS	rank_021	0.76	C-D	1.192	C	B,5-12	SERSWQAD	44.199	8.995	12.615		postGMF-runs\1client\WT_analysis\more_scans\WWC3\WWC3_929-944_output	1client	WT	unknown	AEAISERSWQADSVDS	rank_007	0.82	B-C	0.979545	B	A,5-12	SERSWQAD	30.026	10.658	14.546
postGMF-runs\2client\WT_analysis\more_scans\WWC3\WWC3_929-944_output	2client	WT	unknown	AEAISERSWQADSVDS	rank_021	0.76	C-D	1.192	D	A,5-12	SERSWQAD	43.555	9.016	12.68		postGMF-runs\1client\WT_analysis\more_scans\WWC3\WWC3_929-944_output	1client	WT	unknown	AEAISERSWQADSVDS	rank_007	0.82	B-C	0.979545	B	A,5-12	SERSWQAD	30.026	10.658	14.546
postGMF-runs\2client\WT_analysis\more_scans\WWC3\WWC3_929-944_output	2client	WT	unknown	AEAISERSWQADSVDS	rank_023	0.77	C-D	1.1295	D	B,5-12	SERSWQAD	43.273	8.731	12.473		postGMF-runs\1client\WT_analysis\more_scans\WWC3\WWC3_929-944_output	1client	WT	unknown	AEAISERSWQADSVDS	rank_022	0.81	B-C	1.05364	C	A,4-11	ISERSWQA	28.988	11.324	15.267
postGMF-runs\2client\WT_analysis\more_scans\WWC3\WWC3_929-944_output	2client	WT	unknown	AEAISERSWQADSVDS	rank_023	0.77	C-D	1.1295	C	A,5-12	SERSWQAD	42.681	8.892	12.595		postGMF-runs\1client\WT_analysis\more_scans\WWC3\WWC3_929-944_output	1client	WT	unknown	AEAISERSWQADSVDS	rank_022	0.81	B-C	1.05364	C	A,4-11	ISERSWQA	28.988	11.324	15.267
postGMF-runs\2client\WT_analysis\more_scans\WWC3\WWC3_929-944_output	2client	WT	unknown	AEAISERSWQADSVDS	rank_019	0.77	C-D	1.01292	D	B,5-12	SERSWQAD	41.494	9.995	13.136		postGMF-runs\1client\WT_analysis\more_scans\WWC3\WWC3_929-944_output	1client	WT	unknown	AEAISERSWQADSVDS	rank_021	0.81	B-C	1.09909	C	A,3-10	AISERSWQ	28.816	11.165	14.611
postGMF-runs\2client\WT_analysis\more_scans\WWC3\WWC3_929-944_output	2client	WT	unknown	AEAISERSWQADSVDS	rank_019	0.77	C-D	1.01292	C	A,5-12	SERSWQAD	39.913	10.149	13.419		postGMF-runs\1client\WT_analysis\more_scans\WWC3\WWC3_929-944_output	1client	WT	unknown	AEAISERSWQADSVDS	rank_021	0.81	B-C	1.09909	C	A,3-10	AISERSWQ	28.816	11.165	14.611
postGMF-runs\2client\WT_analysis\more_scans\WWC3\WWC3_929-944_output	2client	WT	unknown	AEAISERSWQADSVDS	rank_014	0.78	C-D	1.01308	D	A,4-11	ISERSWQA	39.714	7.874	12		postGMF-runs\1client\WT_analysis\more_scans\WWC3\WWC3_929-944_output	1client	WT	unknown	AEAISERSWQADSVDS	rank_014	0.82	B-C	0.982083	C	A,4-11	ISERSWQA	28.535	11.799	14.63
postGMF-runs\2client\WT_analysis\more_scans\WWC3\WWC3_929-944_output	2client	WT	unknown	AEAISERSWQADSVDS	rank_014	0.78	C-D	1.01308	C	B,4-11	ISERSWQA	38.051	7.969	12.374		postGMF-runs\1client\WT_analysis\more_scans\WWC3\WWC3_929-944_output	1client	WT	unknown	AEAISERSWQADSVDS	rank_014	0.82	B-C	0.982083	C	A,4-11	ISERSWQA	28.535	11.799	14.63
postGMF-runs\2client\WT_analysis\more_scans\WWC3\WWC3_929-944_output	2client	WT	unknown	AEAISERSWQADSVDS	rank_024	0.76	C-D	1.02385	C	A,5-12	SERSWQAD	38.292	10.263	13.475		postGMF-runs\1client\WT_analysis\more_scans\WWC3\WWC3_929-944_output	1client	WT	unknown	AEAISERSWQADSVDS	rank_024	0.81	B-C	1.04136	C	A,2-9	EAISERSW	28.045	11.436	14.55
postGMF-runs\2client\WT_analysis\more_scans\WWC3\WWC3_929-944_output	2client	WT	unknown	AEAISERSWQADSVDS	rank_024	0.76	C-D	1.02385	D	B,4-11	ISERSWQA	36.742	10.677	13.771		postGMF-runs\1client\WT_analysis\more_scans\WWC3\WWC3_929-944_output	1client	WT	unknown	AEAISERSWQADSVDS	rank_024	0.81	B-C	1.04136	C	A,2-9	EAISERSW	28.045	11.436	14.55
postGMF-runs\2client\WT_analysis\more_scans\WWC3\WWC3_929-944_output	2client	WT	unknown	AEAISERSWQADSVDS	rank_025	0.76	C-D	1.00708	C	B,4-11	ISERSWQA	37.151	10.587	13.511		postGMF-runs\1client\WT_analysis\more_scans\WWC3\WWC3_929-944_output	1client	WT	unknown	AEAISERSWQADSVDS	rank_023	0.81	B-C	1.03591	C	A,3-10	AISERSWQ	27.133	11.737	15.635
postGMF-runs\2client\WT_analysis\more_scans\WWC3\WWC3_929-944_output	2client	WT	unknown	AEAISERSWQADSVDS	rank_025	0.76	C-D	1.00708	D	A,4-11	ISERSWQA	36.579	10.542	13.679		postGMF-runs\1client\WT_analysis\more_scans\WWC3\WWC3_929-944_output	1client	WT	unknown	AEAISERSWQADSVDS	rank_023	0.81	B-C	1.03591	C	A,3-10	AISERSWQ	27.133	11.737	15.635
postGMF-runs\2client\WT_analysis\more_scans\WWC3\WWC3_929-944_output	2client	WT	unknown	AEAISERSWQADSVDS	rank_022	0.77	C-D	0.996538	D	A,7-14	RSWQADSV	34.439	9.387	12.89		postGMF-runs\1client\WT_analysis\more_scans\WWC3\WWC3_929-944_output	1client	WT	unknown	AEAISERSWQADSVDS	rank_025	0.8	B-C	1.09455	C	A,3-10	AISERSWQ	26.499	12.705	16.587
[truncated: 165,772 more rows]
