# Supplementary material for: Successful prediction of LC8 binding to intrinsically disordered proteins sheds light on AlphaFold’s black box
Source: Front Mol Biosci. 2025 Apr 23;12:1531793. doi: 10.3389/fmolb.2025.1531793 (PMC12057147; doi:10.3389/fmolb.2025.1531793)
Supplement: Supplementary file 15 [file Table4.xlsx]

## Sheet: MI(4.5OMvgeo)
	Affinity bins: [0, 0.316, 3.16, 31.6, 100]
	Scores bins: geomtric based on full dataset
			Dataset	Full	TQT	!TQT	<18 AA	=16	=14	=12	TQT=16	TQT=14	TQT=12	!TQT=16	TQT!=12	TQT!=14	TQT!=12||14
	2client		count	108	77	31	98	54	21	13	30	18	12	24	65	59	47	all	>0.2	>0.3	>0.4	>0.5	>0.6	>0.7	>0.2	>0.3	>0.4	>0.5	>0.6	>0.7
		Bests	Conf. Score	0.028	0.026	0.035	0.023	0.095	-0.076	0	0.156	-0.089	0	-0.003	0.038	0.047	0.072	0	0	0	0	0	0	0	0	0	0	0	0	0
			Avg pLDDT	0.045	0.043	0.03	0.055	0.074	-0.0003	-0.077	0.124	-0.001	-0.039	0.035	0.04	0.03	0.021	0	0	0	0	0	0	0	0	0	0	0	0	0
			L->P PAE	0.042	0.039	0.034	0.053	0.115	-0.026	-0.135	0.108	0.051	-0.064	0.161	0.017	0.016	0.002	0	0	0	0	0	0	0	0	0	0	0	0	0
			P->L PAE	0.036	0.001	0.07	0.047	0.053	-0.066	-0.022	0.065	-0.074	-0.064	0.023	-0.017	0.006	-0.019	0	0	0	0	0	0	0	0	0	0	0	0	0
			Dimer PAE	0.045	0.029	0.066	0.052	0.078	0.068	0.153	0.081	0.103	0.188	0.058	0.028	0.023	0.003	0	0	0	0	0	0	0	0	0	0	0	0	0
																		0	0	0	0	0	0	0	0	0	0	0	0	0
		Averages	Conf. Score	0.052	0.035	0.091	0.06	0.061	0.042	-0.077	0.066	-0.001	-0.039	0.036	0.038	0.019	0.023	0	0	0	0	0	0	0	0	0	0	0	0	0
			Avg pLDDT	0.034	0.017	0.052	0.026	0.057	0.137	-0.146	0.155	0.124	-0.113	0.055	0.022	0.013	0.016	0	0	0	0	0	0	0	0	0	0	0	0	0
			L->P PAE	0.005	0.001	-0.028	-0.008	0.004	0.047	-0.135	0.035	0.134	-0.064	-0.029	-0.005	-0.014	-0.026	0	0	0	0	0	0	0	0	0	0	0	0	0
			P->L PAE	0.047	0.02	0.053	0.039	0.053	0.195	-0.141	0.103	0.18	-0.111	0.07	0.022	0.015	0.019	0	0	0	0	0	0	0	0	0	0	0	0	0
			Dimer PAE	0.006	0.032	0.051	-0.006	-0.007	0.164	0.025	0.073	0.376	0.038	0.033	0.108	-0.003	0.071	0	0	0	0	0	0	0	1	1	0	0	0	0
																		0	0	0	0	0	0	0	0	0	0	0	0	0
	1client		count	109	76	33	104	63	21	10	36	18	9	27	67	58	49	0	0	0	0	0	0	0
																		1	0	0	0	0	0	0	0	0	0	0	0	0
		Bests	Conf. Score	0.093	0.097	0.148	0.081	0.075	0.089	-0.125	0.072	0.06	-0.098	0.15	0.113	0.062	0.076	0	0	0	0	0	0	0	0	0	0	0	0	0
			Avg pLDDT	0.015	0.021	0.025	0.015	0.012	-0.0003	0	0.005	-0.001	0	0.032	0.026	0.001	0.004	2	2	2	1	0	0	0	0	0	0	0	0	0
			L->P PAE	0.014	0.014	-0.015	0.015	0.032	0.036	0.328	0.046	0.002	0.473	0.001	0.056	0.001	0.028	1	1	0	0	0	0	0	2	2	1	0	0	0
			P->L PAE	0.087	0.058	0.113	0.095	0.102	0.027	-0.125	0.043	-0.003	-0.098	0.212	0.058	0.027	0.024	2	0	0	0	0	0	0	1	0	0	0	0	0
			Dimer PAE	0.061	0.046	0.095	0.07	0.142	0.197	0.177	0.171	0.144	0.29	0.107	0.095	0.04	0.083	0	0	0	0	0	0	0	1	0	0	0	0	0
																		0	0	0	0	0	0	0	0	0	0	0	0	0
		Averages	Conf. Score	0.05	0.052	0.058	0.049	0.058	0.326	0.112	0.058	0.357	0.014	0.081	0.084	0.021	0.048	0	0	0	0	0	0	0	2	2	0	0	0	0
			Avg pLDDT	0.043	0.038	0.057	0.043	0.025	0.219	-0.058	0.002	0.477	0.014	0.111	0.049	0.007	0.007	0	0	0	0	0	0	0	2	1	1	0	0	0
			L->P PAE	0.059	0.061	0.066	0.064	0.109	0.418	-0.058	0.138	0.521	0.014	0.106	0.053	0.106	0.096	2	2	2	2	1	0	0	2	2	2	1	0	0
			P->L PAE	0.04	0.029	0.082	0.042	0.044	0.423	-0.184	0.015	0.525	-0.089	0.122	0.035	0.011	0.001	0	0	0	0	0	0	0	2	2	2	1	0	0
			Dimer PAE	0.052	0.071	0.146	0.057	0.032	0.235	0.064	0.062	0.306	-0.069	0.079	0.075	0.023	0.017	0	0	0	0	0	0	0	2	1	0	0	0	0
																		0	0	0	0	0	0	0	0	0	0	0	0	0
	Success Rate		count	89	60	29	81	40	21	12	18	18	11	22	49	42	31	6	0	0	0	0	0	0
			correlation	0.113	0.169	0.094	0.102	0.046	0.307	-0.039	-0.006	0.502	0.019	0.206	0.196	0.123	0.13	0	0	0	0	0	0	0	3	2	1	1	0	0
				0.113	0.169	0.148	0.102	0.142	0.423	0.328	0.171	0.525	0.473	0.212	0.196	0.123	0.13	-0.184							18	13	7	3	0	0
			all	32	32	19	32	23	28	21	23	28	21	22	32	32	32
			>0.2	0	0	0	0	0	28	21	0	28	21	22	0	0	0
			>0.3	0	0	0	0	0	28	21	0	28	21	0	0	0	0
			>0.4	0	0	0	0	0	28	0	0	28	21	0	0	0	0
			>0.5	0	0	0	0	0	0	0	0	28	0	0	0	0	0
			>0.6	0	0	0	0	0	0	0	0	0	0	0	0	0	0
			>0.7	0	0	0	0	0	0	0	0	0	0	0	0	0	0
