# Supplementary material for: Successful prediction of LC8 binding to intrinsically disordered proteins sheds light on AlphaFold’s black box
Source: Front Mol Biosci. 2025 Apr 23;12:1531793. doi: 10.3389/fmolb.2025.1531793 (PMC12057147; doi:10.3389/fmolb.2025.1531793)
Supplement: Supplementary file 21 [file Table10.xlsx]

## Sheet: binding_status
File Path	WTorAAA	ClientType	Full Sequence	BindingStatus
1client\AAA_analysis\CF_hASCIZ_scans\scan10_output	AAA	1client	ASNIQAAAEESE	nonbinder
1client\AAA_analysis\CF_hASCIZ_scans\scan11_output	AAA	1client	ESELSAAATEPV	nonbinder
1client\AAA_analysis\CF_hASCIZ_scans\scan12_output	AAA	1client	SLDIEAAADFLL	nonbinder
1client\AAA_analysis\CF_hASCIZ_scans\scan13_output	AAA	1client	MFDTQAAADLNF	nonbinder
1client\AAA_analysis\CF_hASCIZ_scans\scan14_output	AAA	1client	SSDTEAAAEGVS	nonbinder
1client\AAA_analysis\CF_hASCIZ_scans\scan15_output	AAA	1client	LNSTEAAAMSSG	nonbinder
1client\AAA_analysis\CF_hASCIZ_scans\scan16_output	AAA	1client	FTSNEAAAAMDD	nonbinder
1client\AAA_analysis\CF_hASCIZ_scans\scan17_output	AAA	1client	FSSVEAAASAEP	nonbinder
1client\AAA_analysis\CF_hASCIZ_scans\scan1_output	AAA	1client	PISTGAAANFGK	nonbinder
1client\AAA_analysis\CF_hASCIZ_scans\scan2_output	AAA	1client	ISSINAAADLSY	nonbinder
1client\AAA_analysis\CF_hASCIZ_scans\scan3_output	AAA	1client	SVSSCAAADLSF	nonbinder
1client\AAA_analysis\CF_hASCIZ_scans\scan4_output	AAA	1client	DLSFDAAASLPI	nonbinder
1client\AAA_analysis\CF_hASCIZ_scans\scan5_output	AAA	1client	PISVHAAAFLPS	nonbinder
1client\AAA_analysis\CF_hASCIZ_scans\scan6_output	AAA	1client	TSSIAAAADAFM	nonbinder
1client\AAA_analysis\CF_hASCIZ_scans\scan7_output	AAA	1client	GVSREAAASGIE	nonbinder
1client\AAA_analysis\CF_hASCIZ_scans\scan8_output	AAA	1client	MTDNQAAAIDLL	nonbinder
1client\AAA_analysis\CF_hASCIZ_scans\scan9_output	AAA	1client	SSNLPAAALDHR	nonbinder
1client\AAA_analysis\CF_moretrunQTs\hQT1_output	AAA	1client	YMSSQKLDMEAAAEE	nonbinder
1client\AAA_analysis\CF_moretrunQTs\hQT5_output	AAA	1client	EELGLSHIQAAAHW	nonbinder
1client\AAA_analysis\CF_moretrunQTs\hQT6_output	AAA	1client	WPDGLYNTQHAAACD	nonbinder
1client\AAA_analysis\CF_moretrunQTs\hQT7_output	AAA	1client	EPDNFQSTCAAARW	nonbinder
1client\AAA_analysis\CF_QTMruns\QT2Mtrun+1LC8_output	AAA	1client	LRDIEAAAPDTR	nonbinder
1client\AAA_analysis\CF_QTMruns\QT3Mtrun+1LC8_output	AAA	1client	RGDIGAAADDFP	nonbinder
1client\AAA_analysis\CF_QTMruns\QT4Mtrun+1LC8_output	AAA	1client	SAHMYAAACDDL	nonbinder
1client\AAA_analysis\Colabfold_QT2truncated+1LC8\QT2truncated+1LC8_output	AAA	1client	LRDIEAAAPD	nonbinder
1client\AAA_analysis\newQT2trun\QT2Mtrun+1LC8_output	AAA	1client	LAPLLRDIEAAAPDTRGDIG	nonbinder
1client\AAA_analysis\newthreshold\CF_hASCIZ_scans\scan10_output	AAA	1client	ASNIQAAAEESE	nonbinder
1client\AAA_analysis\newthreshold\CF_hASCIZ_scans\scan11_output	AAA	1client	ESELSAAATEPV	nonbinder
1client\AAA_analysis\newthreshold\CF_hASCIZ_scans\scan12_output	AAA	1client	SLDIEAAADFLL	nonbinder
1client\AAA_analysis\newthreshold\CF_hASCIZ_scans\scan13_output	AAA	1client	MFDTQAAADLNF	nonbinder
1client\AAA_analysis\newthreshold\CF_hASCIZ_scans\scan14_output	AAA	1client	SSDTEAAAEGVS	nonbinder
1client\AAA_analysis\newthreshold\CF_hASCIZ_scans\scan15_output	AAA	1client	LNSTEAAAMSSG	nonbinder
1client\AAA_analysis\newthreshold\CF_hASCIZ_scans\scan16_output	AAA	1client	FTSNEAAAAMDD	nonbinder
1client\AAA_analysis\newthreshold\CF_hASCIZ_scans\scan17_output	AAA	1client	FSSVEAAASAEP	nonbinder
1client\AAA_analysis\newthreshold\CF_hASCIZ_scans\scan1_output	AAA	1client	PISTGAAANFGK	nonbinder
1client\AAA_analysis\newthreshold\CF_hASCIZ_scans\scan4_output	AAA	1client	DLSFDAAASLPI	nonbinder
1client\AAA_analysis\newthreshold\CF_hASCIZ_scans\scan5_output	AAA	1client	PISVHAAAFLPS	nonbinder
1client\AAA_analysis\newthreshold\CF_hASCIZ_scans\scan6_output	AAA	1client	TSSIAAAADAFM	nonbinder
1client\AAA_analysis\newthreshold\CF_hASCIZ_scans\scan7_output	AAA	1client	GVSREAAASGIE	nonbinder
1client\AAA_analysis\newthreshold\CF_hASCIZ_scans\scan9_output	AAA	1client	SSNLPAAALDHR	nonbinder
1client\AAA_analysis\newthreshold\dASCIZ\QT1_output	AAA	1client	KLDMEAAAEEDD	nonbinder
1client\AAA_analysis\newthreshold\dASCIZ\QT5_output	AAA	1client	LSHIQAAAHWPD	nonbinder
1client\AAA_analysis\newthreshold\dASCIZ\QT6_output	AAA	1client	YNTQHAAACDEI	nonbinder
1client\AAA_analysis\newthreshold\dASCIZ\QT7_output	AAA	1client	FQSTCAAARWLD	nonbinder
1client\AAA_analysis\newthreshold\Nathanpaperpeptides\BCL2L11_output	AAA	1client	APMSCDKSAAAPSP	nonbinder
1client\AAA_analysis\newthreshold\Nathanpaperpeptides\BSN_output	AAA	1client	PRATAEFSAAAPSP	nonbinder
1client\AAA_analysis\newthreshold\Nathanpaperpeptides\CAPRIN2_output	AAA	1client	NQSFTTASAAAPPQ	nonbinder
1client\AAA_analysis\newthreshold\Nathanpaperpeptides\CCL2_output	AAA	1client	YDSMDHLDKQAAAPKT	nonbinder
1client\AAA_analysis\newthreshold\Nathanpaperpeptides\CCL7_output	AAA	1client	QDFMKHLDKKAAAPKL	nonbinder
1client\AAA_analysis\newthreshold\Nathanpaperpeptides\CIZ1_output	AAA	1client	ARAGRSVSAAAGSM	nonbinder
1client\AAA_analysis\newthreshold\Nathanpaperpeptides\E4_output	AAA	1client	YLQGRQEDKQAAAPPP	nonbinder
1client\AAA_analysis\newthreshold\Nathanpaperpeptides\GLCCI1_output	AAA	1client	SSSTRSIDAAAPSV	nonbinder
1client\AAA_analysis\newthreshold\Nathanpaperpeptides\ICE1_output	AAA	1client	EKELRHIGAAASSD	nonbinder
1client\AAA_analysis\newthreshold\Nathanpaperpeptides\MAST1_output	AAA	1client	YGCTRHQSAAAEDG	nonbinder
1client\AAA_analysis\newthreshold\Nathanpaperpeptides\MUC3A_output	AAA	1client	PVLTSATGAAASPA	nonbinder
1client\AAA_analysis\newthreshold\Nathanpaperpeptides\MUC4_output	AAA	1client	DDNHWTRSAAATRE	nonbinder
1client\AAA_analysis\newthreshold\Nathanpaperpeptides\SLC9A2_output	AAA	1client	DDHSREKGAAASGD	nonbinder
1client\AAA_analysis\newthreshold\Nathanpaperpeptides\SON_output	AAA	1client	YSRKSRCVSAAADPT	nonbinder
1client\AAA_analysis\newthreshold\Nathanpaperpeptides\SPAG5_output	AAA	1client	HPETQDSSAAADTS	nonbinder
1client\AAA_analysis\newthreshold\Nathanpaperpeptides\VP4_output	AAA	1client	YVTNSLNDISAAASTI	nonbinder
1client\AAA_analysis\newthreshold\Nathanpaperpeptides\ZFPM1_output	AAA	1client	PAPPSYSDKGAAAPSK	nonbinder
1client\AAA_analysis\newthreshold\Nathpaperpeptidesnonbinders\ANKIB1_output	AAA	1client	RGDGSDVSAAAPQT	nonbinder
1client\AAA_analysis\newthreshold\Nathpaperpeptidesnonbinders\BSN-shift_output	AAA	1client	SAAAPSPAPASDMP	nonbinder
1client\AAA_analysis\newthreshold\Nathpaperpeptidesnonbinders\CRYBG1_output	AAA	1client	RSFVLPVESAAAVSSQ	nonbinder
1client\AAA_analysis\newthreshold\Nathpaperpeptidesnonbinders\CUL3_output	AAA	1client	KHSGRQLTAAAHMG	nonbinder
1client\AAA_analysis\newthreshold\Nathpaperpeptidesnonbinders\DAZL_output	AAA	1client	TQDDYFKDKRAAAFRRS	nonbinder
1client\AAA_analysis\newthreshold\Nathpaperpeptidesnonbinders\DDX1_output	AAA	1client	DDHSGNAQVAAAKFD	nonbinder
1client\AAA_analysis\newthreshold\Nathpaperpeptidesnonbinders\DMRTA2_output	AAA	1client	SSRSAFSPAAANAS	nonbinder
1client\AAA_analysis\newthreshold\Nathpaperpeptidesnonbinders\EFL1_output	AAA	1client	DERLMCTGAAAFDD	nonbinder
1client\AAA_analysis\newthreshold\Nathpaperpeptidesnonbinders\EMSY_output	AAA	1client	KITFTKPSAAATNT	nonbinder
1client\AAA_analysis\newthreshold\Nathpaperpeptidesnonbinders\EPAS1_output	AAA	1client	TEAKDQCSAAADFN	nonbinder
1client\AAA_analysis\newthreshold\Nathpaperpeptidesnonbinders\IRS1_output	AAA	1client	LPRKVDTAAAANSR	nonbinder
1client\AAA_analysis\newthreshold\Nathpaperpeptidesnonbinders\KCNQ2_output	AAA	1client	DDPMYSSQAAAYGD	nonbinder
1client\AAA_analysis\newthreshold\Nathpaperpeptidesnonbinders\KLK7_output	AAA	1client	SFRHPGYSAAAHVN	nonbinder
1client\AAA_analysis\newthreshold\Nathpaperpeptidesnonbinders\KMT2C_output	AAA	1client	IVSCVSVSAAAASD	nonbinder
1client\AAA_analysis\newthreshold\Nathpaperpeptidesnonbinders\KY_output	AAA	1client	ITSYNSQGAAATVE	nonbinder
1client\AAA_analysis\newthreshold\Nathpaperpeptidesnonbinders\MSTL1_output	AAA	1client	EGYRGTANAAAAAYLA	nonbinder
1client\AAA_analysis\newthreshold\Nathpaperpeptidesnonbinders\MUC2_output	AAA	1client	TPTPTPTGAAAPTT	nonbinder
1client\AAA_analysis\newthreshold\Nathpaperpeptidesnonbinders\MUC5B-1_output	AAA	1client	TTLPVLTSAAAKST	nonbinder
1client\AAA_analysis\newthreshold\Nathpaperpeptidesnonbinders\MUC5B-3_output	AAA	1client	SMATPSSSAAASGT	nonbinder
1client\AAA_analysis\newthreshold\Nathpaperpeptidesnonbinders\NFYC_output	AAA	1client	CLKETLQAAAEVQ	nonbinder
1client\AAA_analysis\newthreshold\Nathpaperpeptidesnonbinders\OTOG_output	AAA	1client	TLQQPLELTAAAAPAG	nonbinder
1client\AAA_analysis\newthreshold\Nathpaperpeptidesnonbinders\PLK1_output	AAA	1client	AASLIQKMAAADPTAR	nonbinder
1client\AAA_analysis\newthreshold\Nathpaperpeptidesnonbinders\POU2F1_output	AAA	1client	ESGDGNTGAAANGL	nonbinder
1client\AAA_analysis\newthreshold\Nathpaperpeptidesnonbinders\PPP2R3A_output	AAA	1client	LQETLTTSAAANLS	nonbinder
1client\AAA_analysis\newthreshold\Nathpaperpeptidesnonbinders\QSER1_output	AAA	1client	KTLTFSGSAAAVTP	nonbinder
1client\AAA_analysis\newthreshold\Nathpaperpeptidesnonbinders\SAV1_output	AAA	1client	NQSFLRTPAAATPH	nonbinder
1client\AAA_analysis\newthreshold\Nathpaperpeptidesnonbinders\SCRN2_output	AAA	1client	VRTLPRFQAAADRR	nonbinder
1client\AAA_analysis\newthreshold\Nathpaperpeptidesnonbinders\SH3RF2_output	AAA	1client	TLVSTASGAAAVFP	nonbinder
1client\AAA_analysis\newthreshold\Nathpaperpeptidesnonbinders\UBN2_output	AAA	1client	PLQATISKAAANPV	nonbinder
1client\AAA_analysis\newthreshold\Nathpaperpeptidesnonbinders\ZNF469_output	AAA	1client	RAAALPEEAAASRR	nonbinder
1client\AAA_analysis\newthreshold\SarahpaperdASCIZpeptides\QT1p_output	AAA	1client	YMSSQKLDMEAAAEE	nonbinder
1client\AAA_analysis\newthreshold\SarahpaperdASCIZpeptides\QT2p_output	AAA	1client	YLAPLLRDIEAAAPD	nonbinder
1client\AAA_analysis\newthreshold\SarahpaperdASCIZpeptides\QT4p_output	AAA	1client	DLQTSAHMYAAACD	nonbinder
1client\AAA_analysis\newthreshold\SarahpaperdASCIZpeptides\QT5p_output	AAA	1client	EELGLSHIQAAAHW	nonbinder
1client\AAA_analysis\newthreshold\SarahpaperdASCIZpeptides\QT6p_output	AAA	1client	WPDGLYNTQHAAACD	nonbinder
1client\AAA_analysis\newthreshold\SarahpaperdASCIZpeptides\QT7p_output	AAA	1client	EPDNFQSTCAAARW	nonbinder
1client\fromGMF\CF_hASCIZ_scans\scan10_output	WT	1client	ASNIQTQTEESE	binder
1client\fromGMF\CF_hASCIZ_scans\scan10_output	WT	1client	ASNIQTQTEESE	Off-target
1client\fromGMF\CF_hASCIZ_scans\scan11_output	WT	1client	ESELSTMTTEPV	nonbinder
1client\fromGMF\CF_hASCIZ_scans\scan12_output	WT	1client	SLDIETQTDFLL	binder
1client\fromGMF\CF_hASCIZ_scans\scan13_output	WT	1client	MFDTQTQTDLNF	binder
1client\fromGMF\CF_hASCIZ_scans\scan14_output	WT	1client	SSDTETQTEGVS	binder
1client\fromGMF\CF_hASCIZ_scans\scan14_output	WT	1client	SSDTETQTEGVS	Off-target
1client\fromGMF\CF_hASCIZ_scans\scan15_output	WT	1client	LNSTETQTMSSG	binder
1client\fromGMF\CF_hASCIZ_scans\scan16_output	WT	1client	FTSNETQTAMDD	binder
1client\fromGMF\CF_hASCIZ_scans\scan17_output	WT	1client	FSSVETQTSAEP	binder
1client\fromGMF\CF_hASCIZ_scans\scan17_output	WT	1client	FSSVETQTSAEP	Off-target
1client\fromGMF\CF_hASCIZ_scans\scan1_output	WT	1client	PISTGVQVNFGK	binder
1client\fromGMF\CF_hASCIZ_scans\scan2_output	WT	1client	ISSINVQTDLSY	unknown
1client\fromGMF\CF_hASCIZ_scans\scan3_output	WT	1client	SVSSCSQTDLSF	unknown
1client\fromGMF\CF_hASCIZ_scans\scan4_output	WT	1client	DLSFDSQVSLPI	nonbinder
1client\fromGMF\CF_hASCIZ_scans\scan5_output	WT	1client	PISVHTQTFLPS	binder
1client\fromGMF\CF_hASCIZ_scans\scan6_output	WT	1client	TSSIAAQTDAFM	binder
1client\fromGMF\CF_hASCIZ_scans\scan7_output	WT	1client	GVSRETQTSGIE	Off-target
1client\fromGMF\CF_hASCIZ_scans\scan7_output	WT	1client	GVSRETQTSGIE	binder
1client\fromGMF\CF_hASCIZ_scans\scan8_output	WT	1client	MTDNQTQTIDLL	unknown
1client\fromGMF\CF_hASCIZ_scans\scan9_output	WT	1client	SSNLPAQTLDHR	nonbinder
1client\fromGMF\CF_moretrunQTs\hQT1_output	WT	1client	YMSSQKLDMETQTEE	binder
1client\fromGMF\CF_moretrunQTs\hQT5_output	WT	1client	EELGLSHIQTQTHW	binder
1client\fromGMF\CF_moretrunQTs\hQT5_output	WT	1client	EELGLSHIQTQTHW	Off-target
1client\fromGMF\CF_moretrunQTs\hQT6_output	WT	1client	WPDGLYNTQHTQTCD	binder
1client\fromGMF\CF_moretrunQTs\hQT7_output	WT	1client	EPDNFQSTCTQTRW	binder
1client\fromGMF\CF_QT2-4AAA+1LC8\QT2-4AAA+1LC8_output	AAA	1client	MLAPLLRDIEAAAPDTRGDIGAAADDFPEEQEPVAVGSHFHAYSETEPMFDLQTSAHMYAAACDDLFEEL	nonbinder
1client\fromGMF\CF_QT2-4scans\12AAQTscans\scan10_output	WT	1client	MFDLQTSAHMYT	nonbinder
1client\fromGMF\CF_QT2-4scans\12AAQTscans\scan11_output	WT	1client	QTCDDLFEEL	nonbinder
1client\fromGMF\CF_QT2-4scans\12AAQTscans\scan1_output	WT	1client	MLAPLLRDIETQ	binder
1client\fromGMF\CF_QT2-4scans\12AAQTscans\scan1_output	WT	1client	MLAPLLRDIETQ	Off-target
1client\fromGMF\CF_QT2-4scans\12AAQTscans\scan2_output	WT	1client	RDIETQTPDTRG	binder
1client\fromGMF\CF_QT2-4scans\12AAQTscans\scan2_output	WT	1client	RDIETQTPDTRG	Off-target
1client\fromGMF\CF_QT2-4scans\12AAQTscans\scan3_output	WT	1client	TPDTRGDIGTMT	binder
1client\fromGMF\CF_QT2-4scans\12AAQTscans\scan4_output	WT	1client	DIGTMTDDFPEE	nonbinder
1client\fromGMF\CF_QT2-4scans\12AAQTscans\scan5_output	WT	1client	DDFPEEQEPVAV	nonbinder
1client\fromGMF\CF_QT2-4scans\12AAQTscans\scan6_output	WT	1client	QEPVAVGSHFHA	nonbinder
1client\fromGMF\CF_QT2-4scans\12AAQTscans\scan7_output	WT	1client	GSHFHAYSETEP	nonbinder
1client\fromGMF\CF_QT2-4scans\12AAQTscans\scan8_output	WT	1client	YSETEPMFDLQT	nonbinder
1client\fromGMF\CF_QT2-4scans\12AAQTscans\scan9_output	WT	1client	MFDLQTSAHMYT	nonbinder
1client\fromGMF\CF_QT2-4scans\16AAQTscans\badscan8_output	WT	1client	CDHMYTQTCDDLFEEL	unknown
1client\fromGMF\CF_QT2-4scans\16AAQTscans\scan1_output	WT	1client	MLAPLLRDIETQTPDT	binder
1client\fromGMF\CF_QT2-4scans\16AAQTscans\scan2_output	WT	1client	IETQTPDTRGDIGTMT	binder
1client\fromGMF\CF_QT2-4scans\16AAQTscans\scan2_output	WT	1client	IETQTPDTRGDIGTMT	Off-target
1client\fromGMF\CF_QT2-4scans\16AAQTscans\scan3_output	WT	1client	RGDIGTMTDDFPEEQE	binder
1client\fromGMF\CF_QT2-4scans\16AAQTscans\scan4_output	WT	1client	DDFPEEQEPVAV	nonbinder
1client\fromGMF\CF_QT2-4scans\16AAQTscans\scan5_output	WT	1client	PVAVGSHFHAYSETEP	nonbinder
1client\fromGMF\CF_QT2-4scans\16AAQTscans\scan6_output	WT	1client	HAYSETEPMFDLQTSA	nonbinder
1client\fromGMF\CF_QT2-4scans\16AAQTscans\scan7_output	WT	1client	MFDLQTSAHMYTQTCD	binder
1client\fromGMF\CF_QT2-4scans\16AAQTscans\scan7_output	WT	1client	MFDLQTSAHMYTQTCD	Off-target
1client\fromGMF\CF_QT2-4scans\16AAQTscans\scan8_output	WT	1client	SAHMYTQTCDDLFEEL	binder
1client\fromGMF\CF_QT2-4scans\16AAQTscans\scan8_output	WT	1client	SAHMYTQTCDDLFEEL	Off-target
1client\fromGMF\CF_QT23a4titrations\QT23a4+1LC8_output	WT	1client	MLAPLLRDIETQTPDTRGDIGTMTDDFPQARREELLAKKARLAEIKRQRELRAQQAGQTSAHMYTQTCDDLFEEL	1equ
1client\fromGMF\CF_QT23a4titrations\QT23a4+2LC8_output	WT	1client	MLAPLLRDIETQTPDTRGDIGTMTDDFPQARREELLAKKARLAEIKRQRELRAQQAGQTSAHMYTQTCDDLFEEL	2equ
1client\fromGMF\CF_QT23a4titrations\QT23a4+3LC8_output	WT	1client	MLAPLLRDIETQTPDTRGDIGTMTDDFPQARREELLAKKARLAEIKRQRELRAQQAGQTSAHMYTQTCDDLFEEL	3equ
1client\fromGMF\CF_QT4-6titrations\QT4-6+1LC8_output	WT	1client	GAMDMFDLQTSAHMYTQTCDDLFEELGLSHIQTQTHWPDGLYNTQHTQTCDEIMDELFPD	1equ
1client\fromGMF\CF_QT4-6titrations\QT4-6+2LC8_output	WT	1client	GAMDMFDLQTSAHMYTQTCDDLFEELGLSHIQTQTHWPDGLYNTQHTQTCDEIMDELFPD	2equ
1client\fromGMF\CF_QT4-6titrations\QT4-6+3LC8_output	WT	1client	GAMDMFDLQTSAHMYTQTCDDLFEELGLSHIQTQTHWPDGLYNTQHTQTCDEIMDELFPD	3equ
1client\fromGMF\CF_QTMruns\QT2Mtrun+1LC8_output	WT	1client	LRDIETQTPDTR	binder
1client\fromGMF\CF_QTMruns\QT3Mtrun+1LC8_output	WT	1client	RGDIGTMTDDFP	binder
1client\fromGMF\CF_QTMruns\QT4Mtrun+1LC8_output	WT	1client	SAHMYTQTCDDL	Off-target
1client\fromGMF\CF_QTMruns\QT4Mtrun+1LC8_output	WT	1client	SAHMYTQTCDDL	binder
1client\fromGMF\CF_sens2+1LC8\sens2+1LC8_output	WT	1client	SEKLRRQSRSRSRSRSRSPCSSQIDMEDADSNHSHRSLHSRSRSRSRSRSHSRSRSHSSSSSVELEVDSPP	nonbinder
1client\fromGMF\CF_sens2+1LC8\sens2_1-16_output	WT	1client	SEKLRRQSRSRSRSRS	nonbinder
1client\fromGMF\CF_sens2+1LC8\sens2_17-32_output	WT	1client	RSPCSSQIDMEDADSN	nonbinder
1client\fromGMF\CF_sens2+1LC8\sens2_25-40_output	WT	1client	DMEDADSNHSHRSLHS	nonbinder
1client\fromGMF\CF_sens2+1LC8\sens2_33-48_output	WT	1client	HSHRSLHSRSRSRSRS	nonbinder
1client\fromGMF\CF_sens2+1LC8\sens2_41-56_output	WT	1client	RSRSRSRSRSHSRSRS	nonbinder
1client\fromGMF\CF_sens2+1LC8\sens2_49-64_output	WT	1client	RSHSRSRSHSSSSSVE	nonbinder
1client\fromGMF\CF_sens2+1LC8\sens2_56-71_output	WT	1client	SHSSSSSVELEVDSPP	nonbinder
1client\fromGMF\CF_sens2+1LC8\sens2_9-24_output	WT	1client	RSRSRSRSRSPCSSQI	nonbinder
1client\fromGMF\CF_zfh2+1LC8\zfh2+1LC8_output	WT	1client	SMDIHHVGICPPGSAVVSQTLSTPGSAAPLSGQYTQHSFGALPSPQHLFAKSSSLTDFSPSTTPTP	nonbinder
1client\fromGMF\CF_zfh2+1LC8\zfh2_1-16_output	WT	1client	SMDIHHVGICPPGSAV	nonbinder
1client\fromGMF\CF_zfh2+1LC8\zfh2_17-32_output	WT	1client	VSQTLSTPGSAAPLSG	nonbinder
1client\fromGMF\CF_zfh2+1LC8\zfh2_25-40_output	WT	1client	GSAAPLSGQYTQHSFG	nonbinder
1client\fromGMF\CF_zfh2+1LC8\zfh2_33-48_output	WT	1client	QYTQHSFGALPSPQHL	nonbinder
1client\fromGMF\CF_zfh2+1LC8\zfh2_41-56_output	WT	1client	ALPSPQHLFAKSSSLT	nonbinder
1client\fromGMF\CF_zfh2+1LC8\zfh2_49-64_output	WT	1client	FAKSSSLTDFSPSTTP	nonbinder
1client\fromGMF\CF_zfh2+1LC8\zfh2_51-66_output	WT	1client	KSSSLTDFSPSTTPTP	nonbinder
1client\fromGMF\CF_zfh2+1LC8\zfh2_9-24_output	WT	1client	ICPPGSAVVSQTLSTP	nonbinder
1client\fromGMF\Colabfold_QT2-4ss_fl-muts\QT2+1LC8_output	WT	1client	MLAPLLRDIETQTPDTRGDIGAAADDFPEEQEPVAVGSHFHAYSETEPMFDLQTSAHMYAAACDDLFEEL	Off-target
1client\fromGMF\Colabfold_QT2-4ss_fl-muts\QT2+1LC8_output	WT	1client	MLAPLLRDIETQTPDTRGDIGAAADDFPEEQEPVAVGSHFHAYSETEPMFDLQTSAHMYAAACDDLFEEL	binder
1client\fromGMF\Colabfold_QT2-4ss_fl-muts\QT3+1LC8_output	WT	1client	MLAPLLRDIEAAAPDTRGDIGTMTDDFPEEQEPVAVGSHFHAYSETEPMFDLQTSAHMYAAACDDLFEEL	Off-target
1client\fromGMF\Colabfold_QT2-4ss_fl-muts\QT4+1LC8_output	WT	1client	MLAPLLRDIEAAAPDTRGDIGAAADDFPEEQEPVAVGSHFHAYSETEPMFDLQTSAHMYTQTCDDLFEEL	Off-target
1client\fromGMF\Colabfold_QT2-4titrations\QT2-4+1LC8_output	WT	1client	MLAPLLRDIETQTPDTRGDIGTMTDDFPEEQEPVAVGSHFHAYSETEPMFDLQTSAHMYTQTCDDLFEEL	1equ
1client\fromGMF\Colabfold_QT2-4titrations\QT2-4+2LC8_output	WT	1client	MLAPLLRDIETQTPDTRGDIGTMTDDFPEEQEPVAVGSHFHAYSETEPMFDLQTSAHMYTQTCDDLFEEL	2equ
1client\fromGMF\Colabfold_QT2-4titrations\QT2-4+3LC8_output	WT	1client	MLAPLLRDIETQTPDTRGDIGTMTDDFPEEQEPVAVGSHFHAYSETEPMFDLQTSAHMYTQTCDDLFEEL	3equ
1client\fromGMF\Colabfold_QT2truncated+1LC8\QT2truncated+1LC8_output	WT	1client	LRDIETQTPD	binder
1client\fromGMF\dASCIZ1-7scans\dASCIZ_1-16_output	WT	1client	MDVSYALEMSSQKLDM	nonbinder
1client\fromGMF\dASCIZ1-7scans\dASCIZ_105-120_output	WT	1client	HIQTQTHWPDGLYNTQ	nonbinder
1client\fromGMF\dASCIZ1-7scans\dASCIZ_113-128_output	WT	1client	PDGLYNTQHTQTCDEI	binder
1client\fromGMF\dASCIZ1-7scans\dASCIZ_121-136_output	WT	1client	HTQTCDEIMDELFPDN	nonbinder
1client\fromGMF\dASCIZ1-7scans\dASCIZ_129-144_output	WT	1client	MDELFPDNFQSTCTQT	binder
1client\fromGMF\dASCIZ1-7scans\dASCIZ_129-144_output	WT	1client	MDELFPDNFQSTCTQT	Off-target
1client\fromGMF\dASCIZ1-7scans\dASCIZ_133-148_output	WT	1client	FPDNFQSTCTQTRWLD	binder
1client\fromGMF\dASCIZ1-7scans\dASCIZ_17-32_output	WT	1client	ETQTEEDDLNEIRNEV	nonbinder
1client\fromGMF\dASCIZ1-7scans\dASCIZ_25-40_output	WT	1client	LNEIRNEVLAPLLRDI	nonbinder
1client\fromGMF\dASCIZ1-7scans\dASCIZ_33-48_output	WT	1client	LAPLLRDIETQTPDTR	binder
1client\fromGMF\dASCIZ1-7scans\dASCIZ_41-56_output	WT	1client	ETQTPDTRGDIGTMTD	binder
1client\fromGMF\dASCIZ1-7scans\dASCIZ_49-64_output	WT	1client	GDIGTMTDDFPEEQEP	binder
1client\fromGMF\dASCIZ1-7scans\dASCIZ_49-64_output	WT	1client	GDIGTMTDDFPEEQEP	Off-target
1client\fromGMF\dASCIZ1-7scans\dASCIZ_57-72_output	WT	1client	DFPEEQEPVAVGSHFH	nonbinder
1client\fromGMF\dASCIZ1-7scans\dASCIZ_65-80_output	WT	1client	VAVGSHFHAYSETEPM	nonbinder
1client\fromGMF\dASCIZ1-7scans\dASCIZ_73-88_output	WT	1client	AYSETEPMFDLQTSAH	nonbinder
1client\fromGMF\dASCIZ1-7scans\dASCIZ_81-96_output	WT	1client	FDLQTSAHMYTQTCDD	binder
1client\fromGMF\dASCIZ1-7scans\dASCIZ_81-96_output	WT	1client	FDLQTSAHMYTQTCDD	Off-target
1client\fromGMF\dASCIZ1-7scans\dASCIZ_89-104_output	WT	1client	MYTQTCDDLFEELGLS	nonbinder
1client\fromGMF\dASCIZ1-7scans\dASCIZ_9-24_output	WT	1client	MSSQKLDMETQTEEDD	binder
1client\fromGMF\dASCIZ1-7scans\dASCIZ_97-112_output	WT	1client	LFEELGLSHIQTQTHW	binder
1client\fromGMF\dASCIZ1-7scans\dASCIZ_97-112_output	WT	1client	LFEELGLSHIQTQTHW	Off-target
1client\fromGMF\newQT2trun\QT2Mtrun+1LC8_output	WT	1client	LAPLLRDIETQTPDTRGDIG	binder
1client\fromGMF\newthreshold\CF_hASCIZ_scans\scan10_output	WT	1client	ASNIQTQTEESE	binder
1client\fromGMF\newthreshold\CF_hASCIZ_scans\scan10_output	WT	1client	ASNIQTQTEESE	Off-target
1client\fromGMF\newthreshold\CF_hASCIZ_scans\scan11_output	WT	1client	ESELSTMTTEPV	nonbinder
1client\fromGMF\newthreshold\CF_hASCIZ_scans\scan12_output	WT	1client	SLDIETQTDFLL	binder
1client\fromGMF\newthreshold\CF_hASCIZ_scans\scan12_output	WT	1client	SLDIETQTDFLL	Off-target
1client\fromGMF\newthreshold\CF_hASCIZ_scans\scan13_output	WT	1client	MFDTQTQTDLNF	binder
1client\fromGMF\newthreshold\CF_hASCIZ_scans\scan14_output	WT	1client	SSDTETQTEGVS	binder
1client\fromGMF\newthreshold\CF_hASCIZ_scans\scan15_output	WT	1client	LNSTETQTMSSG	binder
1client\fromGMF\newthreshold\CF_hASCIZ_scans\scan16_output	WT	1client	FTSNETQTAMDD	binder
1client\fromGMF\newthreshold\CF_hASCIZ_scans\scan17_output	WT	1client	FSSVETQTSAEP	binder
1client\fromGMF\newthreshold\CF_hASCIZ_scans\scan1_output	WT	1client	PISTGVQVNFGK	binder
1client\fromGMF\newthreshold\CF_hASCIZ_scans\scan4_output	WT	1client	DLSFDSQVSLPI	nonbinder
1client\fromGMF\newthreshold\CF_hASCIZ_scans\scan5_output	WT	1client	PISVHTQTFLPS	binder
1client\fromGMF\newthreshold\CF_hASCIZ_scans\scan6_output	WT	1client	TSSIAAQTDAFM	binder
1client\fromGMF\newthreshold\CF_hASCIZ_scans\scan7_output	WT	1client	GVSRETQTSGIE	Off-target
1client\fromGMF\newthreshold\CF_hASCIZ_scans\scan7_output	WT	1client	GVSRETQTSGIE	binder
1client\fromGMF\newthreshold\CF_hASCIZ_scans\scan9_output	WT	1client	SSNLPAQTLDHR	nonbinder
1client\fromGMF\newthreshold\dASCIZ\QT1_output	WT	1client	KLDMETQTEEDD	binder
1client\fromGMF\newthreshold\dASCIZ\QT1_output	WT	1client	KLDMETQTEEDD	Off-target
1client\fromGMF\newthreshold\dASCIZ\QT5_output	WT	1client	LSHIQTQTHWPD	binder
1client\fromGMF\newthreshold\dASCIZ\QT6_output	WT	1client	YNTQHTQTCDEI	Off-target
1client\fromGMF\newthreshold\dASCIZ\QT6_output	WT	1client	YNTQHTQTCDEI	binder
1client\fromGMF\newthreshold\dASCIZ\QT7_output	WT	1client	FQSTCTQTRWLD	binder
1client\fromGMF\newthreshold\Nathanpaperpeptides\BCL2L11_output	WT	1client	APMSCDKSTQTPSP	binder
1client\fromGMF\newthreshold\Nathanpaperpeptides\BSN_output	WT	1client	PRATAEFSTQTPSP	binder
1client\fromGMF\newthreshold\Nathanpaperpeptides\CAPRIN2_output	WT	1client	NQSFTTASTQTPPQ	binder
1client\fromGMF\newthreshold\Nathanpaperpeptides\CCL2_output	WT	1client	YDSMDHLDKQTQTPKT	binder
1client\fromGMF\newthreshold\Nathanpaperpeptides\CCL7_output	WT	1client	QDFMKHLDKKTQTPKL	binder
1client\fromGMF\newthreshold\Nathanpaperpeptides\CCL7_output	WT	1client	QDFMKHLDKKTQTPKL	Off-target
1client\fromGMF\newthreshold\Nathanpaperpeptides\CIZ1_output	WT	1client	ARAGRSVSTQTGSM	binder
1client\fromGMF\newthreshold\Nathanpaperpeptides\E4_output	WT	1client	YLQGRQEDKQTQTPPP	binder
1client\fromGMF\newthreshold\Nathanpaperpeptides\GLCCI1_output	WT	1client	SSSTRSIDTQTPSV	binder
1client\fromGMF\newthreshold\Nathanpaperpeptides\ICE1_output	WT	1client	EKELRHIGTQISSD	binder
1client\fromGMF\newthreshold\Nathanpaperpeptides\MAST1_output	WT	1client	YGCTRHQSVQTEDG	binder
1client\fromGMF\newthreshold\Nathanpaperpeptides\MUC3A_output	WT	1client	PVLTSATGTQTSPA	binder
1client\fromGMF\newthreshold\Nathanpaperpeptides\MUC4_output	WT	1client	DDNHWTRSTQTTRE	binder
1client\fromGMF\newthreshold\Nathanpaperpeptides\SLC9A2_output	WT	1client	DDHSREKGTQTSGD	binder
1client\fromGMF\newthreshold\Nathanpaperpeptides\SON_output	WT	1client	YSRKSRCVSVQTDPT	binder
1client\fromGMF\newthreshold\Nathanpaperpeptides\SPAG5_output	WT	1client	HPETQDSSTQTDTS	binder
1client\fromGMF\newthreshold\Nathanpaperpeptides\VP4_output	WT	1client	YVTNSLNDISTQTSTI	binder
1client\fromGMF\newthreshold\Nathanpaperpeptides\ZFPM1_output	WT	1client	PAPPSYSDKGVQTPSK	binder
1client\fromGMF\newthreshold\Nathpaperpeptidesnonbinders\ANKIB1_output	WT	1client	RGDGSDVSSQTPQT	nonbinder
1client\fromGMF\newthreshold\Nathpaperpeptidesnonbinders\BSN-shift_output	WT	1client	STQTPSPAPASDMP	nonbinder
1client\fromGMF\newthreshold\Nathpaperpeptidesnonbinders\CRYBG1_output	WT	1client	RSFVLPVESTQDVSSQ	nonbinder
1client\fromGMF\newthreshold\Nathpaperpeptidesnonbinders\CUL3_output	WT	1client	KHSGRQLTLQHHMG	nonbinder
1client\fromGMF\newthreshold\Nathpaperpeptidesnonbinders\DAZL_output	WT	1client	TQDDYFKDKRVHHFRRS	nonbinder
1client\fromGMF\newthreshold\Nathpaperpeptidesnonbinders\DDX1_output	WT	1client	DDHSGNAQVTQTKFD	nonbinder
1client\fromGMF\newthreshold\Nathpaperpeptidesnonbinders\DMRTA2_output	WT	1client	SSRSAFSPLQPNAS	nonbinder
1client\fromGMF\newthreshold\Nathpaperpeptidesnonbinders\EFL1_output	WT	1client	DERLMCTGSQTFDD	nonbinder
1client\fromGMF\newthreshold\Nathpaperpeptidesnonbinders\EMSY_output	WT	1client	KITFTKPSTQTTNT	nonbinder
1client\fromGMF\newthreshold\Nathpaperpeptidesnonbinders\EPAS1_output	WT	1client	TEAKDQCSTQTDFN	nonbinder
1client\fromGMF\newthreshold\Nathpaperpeptidesnonbinders\IRS1_output	WT	1client	LPRKVDTAAQTNSR	nonbinder
1client\fromGMF\newthreshold\Nathpaperpeptidesnonbinders\KCNQ2_output	WT	1client	DDPMYSSQTQTYGD	nonbinder
1client\fromGMF\newthreshold\Nathpaperpeptidesnonbinders\KLK7_output	WT	1client	SFRHPGYSTQTHVN	nonbinder
1client\fromGMF\newthreshold\Nathpaperpeptidesnonbinders\KMT2C_output	WT	1client	IVSCVSVSTQTASD	nonbinder
1client\fromGMF\newthreshold\Nathpaperpeptidesnonbinders\KY_output	WT	1client	ITSYNSQGTQLTVE	nonbinder
1client\fromGMF\newthreshold\Nathpaperpeptidesnonbinders\MSTL1_output	WT	1client	EGYRGTANTTTAAYLA	nonbinder
1client\fromGMF\newthreshold\Nathpaperpeptidesnonbinders\MUC2_output	WT	1client	TPTPTPTGTQTPTT	nonbinder
1client\fromGMF\newthreshold\Nathpaperpeptidesnonbinders\MUC5B-1_output	WT	1client	TTLPVLTSTATKST	nonbinder
1client\fromGMF\newthreshold\Nathpaperpeptidesnonbinders\MUC5B-3_output	WT	1client	SMATPSSSTQTSGT	nonbinder
1client\fromGMF\newthreshold\Nathpaperpeptidesnonbinders\NFYC_output	WT	1client	CLKETLQITQTEVQ	nonbinder
1client\fromGMF\newthreshold\Nathpaperpeptidesnonbinders\OTOG_output	WT	1client	TLQQPLELTASQLPAG	nonbinder
1client\fromGMF\newthreshold\Nathpaperpeptidesnonbinders\PLK1_output	WT	1client	AASLIQKMLQTDPTAR	nonbinder
1client\fromGMF\newthreshold\Nathpaperpeptidesnonbinders\POU2F1_output	WT	1client	ESGDGNTGTQTNGL	nonbinder
1client\fromGMF\newthreshold\Nathpaperpeptidesnonbinders\PPP2R3A_output	WT	1client	LQETLTTSSQANLS	nonbinder
1client\fromGMF\newthreshold\Nathpaperpeptidesnonbinders\QSER1_output	WT	1client	KTLTFSGSSQTVTP	nonbinder
1client\fromGMF\newthreshold\Nathpaperpeptidesnonbinders\SAV1_output	WT	1client	NQSFLRTPIQRTPH	nonbinder
1client\fromGMF\newthreshold\Nathpaperpeptidesnonbinders\SCRN2_output	WT	1client	VRTLPRFQTQVDRR	nonbinder
1client\fromGMF\newthreshold\Nathpaperpeptidesnonbinders\SH3RF2_output	WT	1client	TLVSTASGTQTVFP	nonbinder
1client\fromGMF\newthreshold\Nathpaperpeptidesnonbinders\UBN2_output	WT	1client	PLQATISKSQTNPV	nonbinder
1client\fromGMF\newthreshold\Nathpaperpeptidesnonbinders\ZNF469_output	WT	1client	RAAALPEETRSSRR	nonbinder
1client\fromGMF\newthreshold\SarahpaperdASCIZpeptides\QT1p_output	WT	1client	YMSSQKLDMETQTEE	binder
1client\fromGMF\newthreshold\SarahpaperdASCIZpeptides\QT2p_output	WT	1client	YLAPLLRDIETQTPD	binder
1client\fromGMF\newthreshold\SarahpaperdASCIZpeptides\QT4p_output	WT	1client	DLQTSAHMYTQTCD	binder
1client\fromGMF\newthreshold\SarahpaperdASCIZpeptides\QT5p_output	WT	1client	EELGLSHIQTQTHW	binder
1client\fromGMF\newthreshold\SarahpaperdASCIZpeptides\QT6p_output	WT	1client	WPDGLYNTQHTQTCD	binder
1client\fromGMF\newthreshold\SarahpaperdASCIZpeptides\QT7p_output	WT	1client	EPDNFQSTCTQTRW	binder
1client\hASCIZ-parsed\hASCIZ_1-16_output	WT	1client	MAASEAAAAAGSAALA	unknown
1client\hASCIZ-parsed\hASCIZ_105-120_output	WT	1client	LVKSHRLQDGIVNPTI	unknown
1client\hASCIZ-parsed\hASCIZ_113-128_output	WT	1client	DGIVNPTIRKDLKTGP	unknown
1client\hASCIZ-parsed\hASCIZ_121-136_output	WT	1client	RKDLKTGPKFYCCPIE	unknown
1client\hASCIZ-parsed\hASCIZ_129-144_output	WT	1client	KFYCCPIEGCPRGPER	unknown
1client\hASCIZ-parsed\hASCIZ_137-152_output	WT	1client	GCPRGPERPFSQFSLV	unknown
1client\hASCIZ-parsed\hASCIZ_145-160_output	WT	1client	PFSQFSLVKQHFMKMH	unknown
1client\hASCIZ-parsed\hASCIZ_153-168_output	WT	1client	KQHFMKMHAEKKHKCS	unknown
1client\hASCIZ-parsed\hASCIZ_161-176_output	WT	1client	AEKKHKCSKCSNSYGT	unknown
1client\hASCIZ-parsed\hASCIZ_169-184_output	WT	1client	KCSNSYGTEWDLKRHA	unknown
1client\hASCIZ-parsed\hASCIZ_17-32_output	WT	1client	AGARAVPAATTGAAAA	unknown
1client\hASCIZ-parsed\hASCIZ_177-192_output	WT	1client	EWDLKRHAEDCGKTFR	unknown
1client\hASCIZ-parsed\hASCIZ_185-200_output	WT	1client	EDCGKTFRCTCGCPYA	unknown
1client\hASCIZ-parsed\hASCIZ_193-208_output	WT	1client	CTCGCPYASRTALQSH	unknown
1client\hASCIZ-parsed\hASCIZ_201-216_output	WT	1client	SRTALQSHIYRTGHEI	unknown
1client\hASCIZ-parsed\hASCIZ_209-224_output	WT	1client	IYRTGHEIPAEHRDPP	unknown
1client\hASCIZ-parsed\hASCIZ_217-232_output	WT	1client	PAEHRDPPSKKRKMEN	unknown
1client\hASCIZ-parsed\hASCIZ_225-240_output	WT	1client	SKKRKMENCAQNQKLS	unknown
1client\hASCIZ-parsed\hASCIZ_233-248_output	WT	1client	CAQNQKLSNKTIESLN	unknown
1client\hASCIZ-parsed\hASCIZ_241-256_output	WT	1client	NKTIESLNNQPIPRPD	unknown
1client\hASCIZ-parsed\hASCIZ_249-264_output	WT	1client	NQPIPRPDTQELEASE	unknown
1client\hASCIZ-parsed\hASCIZ_25-40_output	WT	1client	ATTGAAAAASGPWVPP	unknown
1client\hASCIZ-parsed\hASCIZ_257-272_output	WT	1client	TQELEASEIKLEPSFE	unknown
1client\hASCIZ-parsed\hASCIZ_265-280_output	WT	1client	IKLEPSFEDSCGSNTD	unknown
1client\hASCIZ-parsed\hASCIZ_273-288_output	WT	1client	DSCGSNTDKQTLTTPP	unknown
1client\hASCIZ-parsed\hASCIZ_281-296_output	WT	1client	KQTLTTPPRYPQKLLL	unknown
1client\hASCIZ-parsed\hASCIZ_289-304_output	WT	1client	RYPQKLLLPKPKVALV	unknown
1client\hASCIZ-parsed\hASCIZ_297-312_output	WT	1client	PKPKVALVKLPVMQFS	unknown
1client\hASCIZ-parsed\hASCIZ_305-320_output	WT	1client	KLPVMQFSVMPVFVPT	unknown
1client\hASCIZ-parsed\hASCIZ_313-328_output	WT	1client	VMPVFVPTADSSAQPV	unknown
1client\hASCIZ-parsed\hASCIZ_321-336_output	WT	1client	ADSSAQPVVLGVDQGS	unknown
1client\hASCIZ-parsed\hASCIZ_329-344_output	WT	1client	VLGVDQGSATGAVHLM	unknown
1client\hASCIZ-parsed\hASCIZ_33-48_output	WT	1client	ASGPWVPPGPRLRGSR	unknown
1client\hASCIZ-parsed\hASCIZ_337-352_output	WT	1client	ATGAVHLMPLSVGTLI	unknown
1client\hASCIZ-parsed\hASCIZ_345-360_output	WT	1client	PLSVGTLILGLDSEAC	unknown
1client\hASCIZ-parsed\hASCIZ_353-368_output	WT	1client	LGLDSEACSLKESLPL	unknown
1client\hASCIZ-parsed\hASCIZ_361-376_output	WT	1client	SLKESLPLFKIANPIA	unknown
1client\hASCIZ-parsed\hASCIZ_369-384_output	WT	1client	FKIANPIAGEPISTGV	unknown
1client\hASCIZ-parsed\hASCIZ_377-392_output	WT	1client	GEPISTGVQVNFGKSP	unknown
1client\hASCIZ-parsed\hASCIZ_385-400_output	WT	1client	QVNFGKSPSNPLQELG	unknown
1client\hASCIZ-parsed\hASCIZ_393-408_output	WT	1client	SNPLQELGNTCQKNSI	unknown
1client\hASCIZ-parsed\hASCIZ_401-416_output	WT	1client	NTCQKNSISSINVQTD	unknown
1client\hASCIZ-parsed\hASCIZ_409-424_output	WT	1client	SSINVQTDLSYASQNF	unknown
1client\hASCIZ-parsed\hASCIZ_41-56_output	WT	1client	GPRLRGSRPRPAGATQ	unknown
1client\hASCIZ-parsed\hASCIZ_417-432_output	WT	1client	LSYASQNFIPSAQWAT	unknown
1client\hASCIZ-parsed\hASCIZ_425-440_output	WT	1client	IPSAQWATADSSVSSC	unknown
1client\hASCIZ-parsed\hASCIZ_433-448_output	WT	1client	ADSSVSSCSQTDLSFD	unknown
1client\hASCIZ-parsed\hASCIZ_441-456_output	WT	1client	SQTDLSFDSQVSLPIS	unknown
1client\hASCIZ-parsed\hASCIZ_449-464_output	WT	1client	SQVSLPISVHTQTFLP	unknown
1client\hASCIZ-parsed\hASCIZ_457-472_output	WT	1client	VHTQTFLPSSKVTSSI	unknown
1client\hASCIZ-parsed\hASCIZ_465-480_output	WT	1client	SSKVTSSIAAQTDAFM	unknown
1client\hASCIZ-parsed\hASCIZ_473-488_output	WT	1client	AAQTDAFMDTCFQSGG	unknown
1client\hASCIZ-parsed\hASCIZ_481-496_output	WT	1client	DTCFQSGGVSRETQTS	unknown
1client\hASCIZ-parsed\hASCIZ_489-504_output	WT	1client	VSRETQTSGIESPTDD	unknown
1client\hASCIZ-parsed\hASCIZ_49-64_output	WT	1client	PRPAGATQQPAVPAPP	unknown
1client\hASCIZ-parsed\hASCIZ_497-512_output	WT	1client	GIESPTDDHVQMDQAG	unknown
1client\hASCIZ-parsed\hASCIZ_505-520_output	WT	1client	HVQMDQAGMCGDIFES	unknown
1client\hASCIZ-parsed\hASCIZ_513-528_output	WT	1client	MCGDIFESVHSSYNVA	unknown
1client\hASCIZ-parsed\hASCIZ_521-536_output	WT	1client	VHSSYNVATGNIISNS	unknown
1client\hASCIZ-parsed\hASCIZ_529-544_output	WT	1client	TGNIISNSLVAETVTH	unknown
1client\hASCIZ-parsed\hASCIZ_537-552_output	WT	1client	LVAETVTHSLLPQNEP	unknown
1client\hASCIZ-parsed\hASCIZ_545-560_output	WT	1client	SLLPQNEPKTLNQDIE	unknown
1client\hASCIZ-parsed\hASCIZ_553-568_output	WT	1client	KTLNQDIEKSAPIINF	unknown
1client\hASCIZ-parsed\hASCIZ_561-576_output	WT	1client	KSAPIINFSAQNSMLP	unknown
1client\hASCIZ-parsed\hASCIZ_569-584_output	WT	1client	SAQNSMLPSQNMTDNQ	unknown
1client\hASCIZ-parsed\hASCIZ_57-72_output	WT	1client	QPAVPAPPAGELIQPS	unknown
1client\hASCIZ-parsed\hASCIZ_577-592_output	WT	1client	SQNMTDNQTQTIDLLS	unknown
1client\hASCIZ-parsed\hASCIZ_585-600_output	WT	1client	TQTIDLLSDLENILSS	unknown
1client\hASCIZ-parsed\hASCIZ_593-608_output	WT	1client	DLENILSSNLPAQTLD	unknown
1client\hASCIZ-parsed\hASCIZ_601-616_output	WT	1client	NLPAQTLDHRSLLSDT	unknown
1client\hASCIZ-parsed\hASCIZ_609-624_output	WT	1client	HRSLLSDTNPGPDTQL	unknown
1client\hASCIZ-parsed\hASCIZ_617-632_output	WT	1client	NPGPDTQLPSGPAQNP	unknown
1client\hASCIZ-parsed\hASCIZ_625-640_output	WT	1client	PSGPAQNPGIDFDIEE	unknown
1client\hASCIZ-parsed\hASCIZ_633-648_output	WT	1client	GIDFDIEEFFSASNIQ	unknown
1client\hASCIZ-parsed\hASCIZ_641-656_output	WT	1client	FFSASNIQTQTEESEL	unknown
1client\hASCIZ-parsed\hASCIZ_649-664_output	WT	1client	TQTEESELSTMTTEPV	unknown
1client\hASCIZ-parsed\hASCIZ_65-80_output	WT	1client	AGELIQPSVSELSRAV	unknown
1client\hASCIZ-parsed\hASCIZ_657-672_output	WT	1client	STMTTEPVLESLDIET	unknown
1client\hASCIZ-parsed\hASCIZ_665-680_output	WT	1client	LESLDIETQTDFLLAD	unknown
1client\hASCIZ-parsed\hASCIZ_673-688_output	WT	1client	QTDFLLADTSAQSYGC	unknown
1client\hASCIZ-parsed\hASCIZ_681-696_output	WT	1client	TSAQSYGCRGNSNFLG	unknown
1client\hASCIZ-parsed\hASCIZ_689-704_output	WT	1client	RGNSNFLGLEMFDTQT	unknown
1client\hASCIZ-parsed\hASCIZ_697-712_output	WT	1client	LEMFDTQTQTDLNFFL	unknown
1client\hASCIZ-parsed\hASCIZ_705-720_output	WT	1client	QTDLNFFLDSSPHLPL	unknown
1client\hASCIZ-parsed\hASCIZ_713-728_output	WT	1client	DSSPHLPLGSILKHSS	unknown
1client\hASCIZ-parsed\hASCIZ_721-736_output	WT	1client	GSILKHSSFSVSTDSS	unknown
1client\hASCIZ-parsed\hASCIZ_729-744_output	WT	1client	FSVSTDSSDTETQTEG	unknown
1client\hASCIZ-parsed\hASCIZ_73-88_output	WT	1client	VSELSRAVRTNILCTV	unknown
1client\hASCIZ-parsed\hASCIZ_737-752_output	WT	1client	DTETQTEGVSTAKNIP	unknown
1client\hASCIZ-parsed\hASCIZ_745-760_output	WT	1client	VSTAKNIPALESKVQL	unknown
1client\hASCIZ-parsed\hASCIZ_753-768_output	WT	1client	ALESKVQLNSTETQTM	unknown
1client\hASCIZ-parsed\hASCIZ_761-776_output	WT	1client	NSTETQTMSSGFETLG	unknown
1client\hASCIZ-parsed\hASCIZ_769-784_output	WT	1client	SSGFETLGSLFFTSNE	unknown
1client\hASCIZ-parsed\hASCIZ_777-792_output	WT	1client	SLFFTSNETQTAMDDF	unknown
1client\hASCIZ-parsed\hASCIZ_785-800_output	WT	1client	TQTAMDDFLLADLAWN	unknown
1client\hASCIZ-parsed\hASCIZ_793-808_output	WT	1client	LLADLAWNTMESQFSS	unknown
1client\hASCIZ-parsed\hASCIZ_801-816_output	WT	1client	TMESQFSSVETQTSAE	unknown
1client\hASCIZ-parsed\hASCIZ_808-823_output	WT	1client	SVETQTSAEPHTVSNF	unknown
1client\hASCIZ-parsed\hASCIZ_81-96_output	WT	1client	RTNILCTVRGCGKILP	unknown
1client\hASCIZ-parsed\hASCIZ_89-104_output	WT	1client	RGCGKILPNSPALNMH	unknown
1client\hASCIZ-parsed\hASCIZ_9-24_output	WT	1client	AAGSAALAAGARAVPA	unknown
1client\hASCIZ-parsed\hASCIZ_97-112_output	WT	1client	NSPALNMHLVKSHRLQ	unknown
1client\QT2-4scan\QT2-4_1-16_output	WT	1client	NEVLAPLLRDIETQTP	binder
1client\QT2-4scan\QT2-4_17-32_output	WT	1client	DTRGDIGTMTDDFPEE	binder
1client\QT2-4scan\QT2-4_25-40_output	WT	1client	MTDDFPEEQEPVAVGS	nonbinder
1client\QT2-4scan\QT2-4_33-48_output	WT	1client	QEPVAVGSHFHAYSET	nonbinder
1client\QT2-4scan\QT2-4_41-56_output	WT	1client	HFHAYSETEPMFDLQT	nonbinder
1client\QT2-4scan\QT2-4_49-64_output	WT	1client	EPMFDLQTSAHMYTQT	Off-target
1client\QT2-4scan\QT2-4_56-71_output	WT	1client	TSAHMYTQTCDDLFEE	binder
1client\QT2-4scan\QT2-4_56-71_output	WT	1client	TSAHMYTQTCDDLFEE	Off-target
1client\QT2-4scan\QT2-4_9-24_output	WT	1client	RDIETQTPDTRGDIGT	Off-target
1client\QT2-4scan\QT2-4_9-24_output	WT	1client	RDIETQTPDTRGDIGT	binder
2client\AAA_analysis\CF_hASCIZ_scans\scan10_output	AAA	2client	ASNIQAAAEESE	nonbinder
2client\AAA_analysis\CF_hASCIZ_scans\scan11_output	AAA	2client	ESELSAAATEPV	nonbinder
2client\AAA_analysis\CF_hASCIZ_scans\scan12_output	AAA	2client	SLDIEAAADFLL	nonbinder
2client\AAA_analysis\CF_hASCIZ_scans\scan13_output	AAA	2client	MFDTQAAADLNF	nonbinder
2client\AAA_analysis\CF_hASCIZ_scans\scan14_output	AAA	2client	SSDTEAAAEGVS	nonbinder
2client\AAA_analysis\CF_hASCIZ_scans\scan15_output	AAA	2client	LNSTEAAAMSSG	nonbinder
2client\AAA_analysis\CF_hASCIZ_scans\scan16_output	AAA	2client	FTSNEAAAAMDD	nonbinder
2client\AAA_analysis\CF_hASCIZ_scans\scan17_output	AAA	2client	FSSVEAAASAEP	nonbinder
2client\AAA_analysis\CF_hASCIZ_scans\scan1_output	AAA	2client	PISTGAAANFGK	nonbinder
2client\AAA_analysis\CF_hASCIZ_scans\scan2_output	AAA	2client	ISSINAAADLSY	nonbinder
2client\AAA_analysis\CF_hASCIZ_scans\scan3_output	AAA	2client	SVSSCAAADLSF	nonbinder
2client\AAA_analysis\CF_hASCIZ_scans\scan4_output	AAA	2client	DLSFDAAASLPI	nonbinder
2client\AAA_analysis\CF_hASCIZ_scans\scan5_output	AAA	2client	PISVHAAAFLPS	nonbinder
2client\AAA_analysis\CF_hASCIZ_scans\scan6_output	AAA	2client	TSSIAAAADAFM	nonbinder
2client\AAA_analysis\CF_hASCIZ_scans\scan7_output	AAA	2client	GVSREAAASGIE	nonbinder
2client\AAA_analysis\CF_hASCIZ_scans\scan8_output	AAA	2client	MTDNQAAAIDLL	nonbinder
2client\AAA_analysis\CF_hASCIZ_scans\scan9_output	AAA	2client	SSNLPAAALDHR	nonbinder
2client\AAA_analysis\CF_moretrunQTs\hQT1_output	AAA	2client	YMSSQKLDMEAAAEE	nonbinder
2client\AAA_analysis\CF_moretrunQTs\hQT5_output	AAA	2client	EELGLSHIQAAAHW	nonbinder
2client\AAA_analysis\CF_moretrunQTs\hQT6_output	AAA	2client	WPDGLYNTQHAAACD	nonbinder
2client\AAA_analysis\CF_moretrunQTs\hQT7_output	AAA	2client	EPDNFQSTCAAARW	nonbinder
2client\AAA_analysis\CF_QTMruns\QT2Mtrun+1LC8_output	AAA	2client	LRDIEAAAPDTR	nonbinder
2client\AAA_analysis\CF_QTMruns\QT3Mtrun+1LC8_output	AAA	2client	RGDIGAAADDFP	nonbinder
2client\AAA_analysis\CF_QTMruns\QT4Mtrun+1LC8_output	AAA	2client	SAHMYAAACDDL	nonbinder
2client\AAA_analysis\Colabfold_QT2truncated+1LC8\QT2truncated+1LC8_output	AAA	2client	LRDIEAAAPD	nonbinder
2client\AAA_analysis\newQT2trun\QT2Mtrun+1LC8_output	AAA	2client	LAPLLRDIEAAAPDTRGDIG	nonbinder
2client\AAA_analysis\newthreshold\CF_hASCIZ_scans\scan10_output	AAA	2client	ASNIQAAAEESE	nonbinder
2client\AAA_analysis\newthreshold\CF_hASCIZ_scans\scan11_output	AAA	2client	ESELSAAATEPV	nonbinder
2client\AAA_analysis\newthreshold\CF_hASCIZ_scans\scan12_output	AAA	2client	SLDIEAAADFLL	nonbinder
2client\AAA_analysis\newthreshold\CF_hASCIZ_scans\scan13_output	AAA	2client	MFDTQAAADLNF	nonbinder
2client\AAA_analysis\newthreshold\CF_hASCIZ_scans\scan14_output	AAA	2client	SSDTEAAAEGVS	nonbinder
2client\AAA_analysis\newthreshold\CF_hASCIZ_scans\scan15_output	AAA	2client	LNSTEAAAMSSG	nonbinder
2client\AAA_analysis\newthreshold\CF_hASCIZ_scans\scan16_output	AAA	2client	FTSNEAAAAMDD	nonbinder
2client\AAA_analysis\newthreshold\CF_hASCIZ_scans\scan17_output	AAA	2client	FSSVEAAASAEP	nonbinder
2client\AAA_analysis\newthreshold\CF_hASCIZ_scans\scan1_output	AAA	2client	PISTGAAANFGK	nonbinder
2client\AAA_analysis\newthreshold\CF_hASCIZ_scans\scan4_output	AAA	2client	DLSFDAAASLPI	nonbinder
2client\AAA_analysis\newthreshold\CF_hASCIZ_scans\scan5_output	AAA	2client	PISVHAAAFLPS	nonbinder
2client\AAA_analysis\newthreshold\CF_hASCIZ_scans\scan6_output	AAA	2client	TSSIAAAADAFM	nonbinder
2client\AAA_analysis\newthreshold\CF_hASCIZ_scans\scan7_output	AAA	2client	GVSREAAASGIE	nonbinder
2client\AAA_analysis\newthreshold\CF_hASCIZ_scans\scan9_output	AAA	2client	SSNLPAAALDHR	nonbinder
2client\AAA_analysis\newthreshold\dASCIZ\QT1_output	AAA	2client	KLDMEAAAEEDD	nonbinder
2client\AAA_analysis\newthreshold\dASCIZ\QT5_output	AAA	2client	LSHIQAAAHWPD	nonbinder
2client\AAA_analysis\newthreshold\dASCIZ\QT6_output	AAA	2client	YNTQHAAACDEI	nonbinder
2client\AAA_analysis\newthreshold\dASCIZ\QT7_output	AAA	2client	FQSTCAAARWLD	nonbinder
2client\AAA_analysis\newthreshold\Nathanpaperpeptides\BCL2L11_output	AAA	2client	APMSCDKSAAAPSP	nonbinder
2client\AAA_analysis\newthreshold\Nathanpaperpeptides\BSN_output	AAA	2client	PRATAEFSAAAPSP	nonbinder
2client\AAA_analysis\newthreshold\Nathanpaperpeptides\CAPRIN2_output	AAA	2client	NQSFTTASAAAPPQ	nonbinder
2client\AAA_analysis\newthreshold\Nathanpaperpeptides\CCL2_output	AAA	2client	YDSMDHLDKQAAAPKT	nonbinder
2client\AAA_analysis\newthreshold\Nathanpaperpeptides\CCL7_output	AAA	2client	QDFMKHLDKKAAAPKL	nonbinder
2client\AAA_analysis\newthreshold\Nathanpaperpeptides\CIZ1_output	AAA	2client	ARAGRSVSAAAGSM	nonbinder
2client\AAA_analysis\newthreshold\Nathanpaperpeptides\E4_output	AAA	2client	YLQGRQEDKQAAAPPP	nonbinder
2client\AAA_analysis\newthreshold\Nathanpaperpeptides\GLCCI1_output	AAA	2client	SSSTRSIDAAAPSV	nonbinder
2client\AAA_analysis\newthreshold\Nathanpaperpeptides\ICE1_output	AAA	2client	EKELRHIGAAASSD	nonbinder
2client\AAA_analysis\newthreshold\Nathanpaperpeptides\MAST1_output	AAA	2client	YGCTRHQSAAAEDG	nonbinder
2client\AAA_analysis\newthreshold\Nathanpaperpeptides\MUC3A_output	AAA	2client	PVLTSATGAAASPA	nonbinder
2client\AAA_analysis\newthreshold\Nathanpaperpeptides\MUC4_output	AAA	2client	DDNHWTRSAAATRE	nonbinder
2client\AAA_analysis\newthreshold\Nathanpaperpeptides\SLC9A2_output	AAA	2client	DDHSREKGAAASGD	nonbinder
2client\AAA_analysis\newthreshold\Nathanpaperpeptides\SON_output	AAA	2client	YSRKSRCVSAAADPT	nonbinder
2client\AAA_analysis\newthreshold\Nathanpaperpeptides\SPAG5_output	AAA	2client	HPETQDSSAAADTS	nonbinder
2client\AAA_analysis\newthreshold\Nathanpaperpeptides\VP4_output	AAA	2client	YVTNSLNDISAAASTI	nonbinder
2client\AAA_analysis\newthreshold\Nathanpaperpeptides\ZFPM1_output	AAA	2client	PAPPSYSDKGAAAPSK	nonbinder
2client\AAA_analysis\newthreshold\Nathpaperpeptidesnonbinders\ANKIB1_output	AAA	2client	RGDGSDVSAAAPQT	nonbinder
2client\AAA_analysis\newthreshold\Nathpaperpeptidesnonbinders\BSN-shift_output	AAA	2client	SAAAPSPAPASDMP	nonbinder
2client\AAA_analysis\newthreshold\Nathpaperpeptidesnonbinders\CRYBG1_output	AAA	2client	RSFVLPVESAAAVSSQ	nonbinder
2client\AAA_analysis\newthreshold\Nathpaperpeptidesnonbinders\CUL3_output	AAA	2client	KHSGRQLTAAAHMG	nonbinder
2client\AAA_analysis\newthreshold\Nathpaperpeptidesnonbinders\DAZL_output	AAA	2client	TQDDYFKDKRAAAFRRS	nonbinder
2client\AAA_analysis\newthreshold\Nathpaperpeptidesnonbinders\DDX1_output	AAA	2client	DDHSGNAQVAAAKFD	nonbinder
2client\AAA_analysis\newthreshold\Nathpaperpeptidesnonbinders\DMRTA2_output	AAA	2client	SSRSAFSPAAANAS	nonbinder
2client\AAA_analysis\newthreshold\Nathpaperpeptidesnonbinders\EFL1_output	AAA	2client	DERLMCTGAAAFDD	nonbinder
2client\AAA_analysis\newthreshold\Nathpaperpeptidesnonbinders\EMSY_output	AAA	2client	KITFTKPSAAATNT	nonbinder
2client\AAA_analysis\newthreshold\Nathpaperpeptidesnonbinders\EPAS1_output	AAA	2client	TEAKDQCSAAADFN	nonbinder
2client\AAA_analysis\newthreshold\Nathpaperpeptidesnonbinders\IRS1_output	AAA	2client	LPRKVDTAAAANSR	nonbinder
2client\AAA_analysis\newthreshold\Nathpaperpeptidesnonbinders\KCNQ2_output	AAA	2client	DDPMYSSQAAAYGD	nonbinder
2client\AAA_analysis\newthreshold\Nathpaperpeptidesnonbinders\KLK7_output	AAA	2client	SFRHPGYSAAAHVN	nonbinder
2client\AAA_analysis\newthreshold\Nathpaperpeptidesnonbinders\KMT2C_output	AAA	2client	IVSCVSVSAAAASD	nonbinder
2client\AAA_analysis\newthreshold\Nathpaperpeptidesnonbinders\KY_output	AAA	2client	ITSYNSQGAAATVE	nonbinder
2client\AAA_analysis\newthreshold\Nathpaperpeptidesnonbinders\MSTL1_output	AAA	2client	EGYRGTANAAAAAYLA	nonbinder
2client\AAA_analysis\newthreshold\Nathpaperpeptidesnonbinders\MUC2_output	AAA	2client	TPTPTPTGAAAPTT	nonbinder
2client\AAA_analysis\newthreshold\Nathpaperpeptidesnonbinders\MUC5B-1_output	AAA	2client	TTLPVLTSAAAKST	nonbinder
2client\AAA_analysis\newthreshold\Nathpaperpeptidesnonbinders\MUC5B-3_output	AAA	2client	SMATPSSSAAASGT	nonbinder
2client\AAA_analysis\newthreshold\Nathpaperpeptidesnonbinders\NFYC_output	AAA	2client	CLKETLQAAAEVQ	nonbinder
2client\AAA_analysis\newthreshold\Nathpaperpeptidesnonbinders\OTOG_output	AAA	2client	TLQQPLELTAAAAPAG	nonbinder
2client\AAA_analysis\newthreshold\Nathpaperpeptidesnonbinders\PLK1_output	AAA	2client	AASLIQKMAAADPTAR	nonbinder
2client\AAA_analysis\newthreshold\Nathpaperpeptidesnonbinders\POU2F1_output	AAA	2client	ESGDGNTGAAANGL	nonbinder
2client\AAA_analysis\newthreshold\Nathpaperpeptidesnonbinders\PPP2R3A_output	AAA	2client	LQETLTTSAAANLS	nonbinder
2client\AAA_analysis\newthreshold\Nathpaperpeptidesnonbinders\QSER1_output	AAA	2client	KTLTFSGSAAAVTP	nonbinder
2client\AAA_analysis\newthreshold\Nathpaperpeptidesnonbinders\SAV1_output	AAA	2client	NQSFLRTPAAATPH	nonbinder
2client\AAA_analysis\newthreshold\Nathpaperpeptidesnonbinders\SCRN2_output	AAA	2client	VRTLPRFQAAADRR	nonbinder
2client\AAA_analysis\newthreshold\Nathpaperpeptidesnonbinders\SH3RF2_output	AAA	2client	TLVSTASGAAAVFP	nonbinder
2client\AAA_analysis\newthreshold\Nathpaperpeptidesnonbinders\UBN2_output	AAA	2client	PLQATISKAAANPV	nonbinder
2client\AAA_analysis\newthreshold\Nathpaperpeptidesnonbinders\ZNF469_output	AAA	2client	RAAALPEEAAASRR	nonbinder
2client\AAA_analysis\newthreshold\SarahpaperdASCIZpeptides\QT1p_output	AAA	2client	YMSSQKLDMEAAAEE	nonbinder
2client\AAA_analysis\newthreshold\SarahpaperdASCIZpeptides\QT2p_output	AAA	2client	YLAPLLRDIEAAAPD	nonbinder
2client\AAA_analysis\newthreshold\SarahpaperdASCIZpeptides\QT4p_output	AAA	2client	DLQTSAHMYAAACD	nonbinder
2client\AAA_analysis\newthreshold\SarahpaperdASCIZpeptides\QT5p_output	AAA	2client	EELGLSHIQAAAHW	nonbinder
2client\AAA_analysis\newthreshold\SarahpaperdASCIZpeptides\QT6p_output	AAA	2client	WPDGLYNTQHAAACD	nonbinder
2client\AAA_analysis\newthreshold\SarahpaperdASCIZpeptides\QT7p_output	AAA	2client	EPDNFQSTCAAARW	nonbinder
2client\Colabfold_QT2-4\QT2-4_1-16_output	WT	2client	NEVLAPLLRDIETQTP	binder
2client\Colabfold_QT2-4\QT2-4_17-32_output	WT	2client	DTRGDIGTMTDDFPEE	binder
2client\Colabfold_QT2-4\QT2-4_25-40_output	WT	2client	MTDDFPEEQEPVAVGS	nonbinder
2client\Colabfold_QT2-4\QT2-4_33-48_output	WT	2client	QEPVAVGSHFHAYSET	nonbinder
2client\Colabfold_QT2-4\QT2-4_41-56_output	WT	2client	HFHAYSETEPMFDLQT	nonbinder
2client\Colabfold_QT2-4\QT2-4_49-64_output	WT	2client	EPMFDLQTSAHMYTQT	binder
2client\Colabfold_QT2-4\QT2-4_49-64_output	WT	2client	EPMFDLQTSAHMYTQT	Off-target
2client\Colabfold_QT2-4\QT2-4_56-71_output	WT	2client	TSAHMYTQTCDDLFEE	binder
2client\Colabfold_QT2-4\QT2-4_56-71_output	WT	2client	TSAHMYTQTCDDLFEE	Off-target
2client\Colabfold_QT2-4\QT2-4_9-24_output	WT	2client	RDIETQTPDTRGDIGT	binder
2client\Colabfold_QT2-4\QT2-4_9-24_output	WT	2client	RDIETQTPDTRGDIGT	Off-target
2client\fromGMF\CF_hASCIZ_scans\scan1\h1+1LC8_output	WT	2client	PISTGVQVNFGK	binder
2client\fromGMF\CF_hASCIZ_scans\scan10\h10+1LC8results	WT	2client	ASNIQTQTEESE	binder
2client\fromGMF\CF_hASCIZ_scans\scan10\h10+1LC8results	WT	2client	ASNIQTQTEESE	Off-target
2client\fromGMF\CF_hASCIZ_scans\scan11\h11+1LC8results	WT	2client	ESELSTMTTEPV	nonbinder
2client\fromGMF\CF_hASCIZ_scans\scan12\h12+1LC8results	WT	2client	SLDIETQTDFLL	binder
2client\fromGMF\CF_hASCIZ_scans\scan12\h12+1LC8results	WT	2client	SLDIETQTDFLL	Off-target
2client\fromGMF\CF_hASCIZ_scans\scan13\h13+1LC8results	WT	2client	MFDTQTQTDLNF	binder
2client\fromGMF\CF_hASCIZ_scans\scan13\h13+1LC8results	WT	2client	MFDTQTQTDLNF	Off-target
2client\fromGMF\CF_hASCIZ_scans\scan14\h14+1LC8results	WT	2client	SSDTETQTEGVS	binder
2client\fromGMF\CF_hASCIZ_scans\scan14\h14+1LC8results	WT	2client	SSDTETQTEGVS	Off-target
2client\fromGMF\CF_hASCIZ_scans\scan15\h15+1LC8results	WT	2client	LNSTETQTMSSG	binder
2client\fromGMF\CF_hASCIZ_scans\scan15\h15+1LC8results	WT	2client	LNSTETQTMSSG	Off-target
2client\fromGMF\CF_hASCIZ_scans\scan16\h16+1LC8results	WT	2client	FTSNETQTAMDD	binder
2client\fromGMF\CF_hASCIZ_scans\scan17\h17+1LC8results	WT	2client	FSSVETQTSAEP	binder
2client\fromGMF\CF_hASCIZ_scans\scan2\h2+1LC8_output	WT	2client	ISSINVQTDLSY	unknown
2client\fromGMF\CF_hASCIZ_scans\scan3\h3+1LC8results	WT	2client	SVSSCSQTDLSF	unknown
2client\fromGMF\CF_hASCIZ_scans\scan4\h4+1LC8results	WT	2client	DLSFDSQVSLPI	nonbinder
2client\fromGMF\CF_hASCIZ_scans\scan5\h5+1LC8results	WT	2client	PISVHTQTFLPS	binder
2client\fromGMF\CF_hASCIZ_scans\scan6\h6+1LC8results	WT	2client	TSSIAAQTDAFM	binder
2client\fromGMF\CF_hASCIZ_scans\scan7\h7+1LC8results	WT	2client	GVSRETQTSGIE	binder
2client\fromGMF\CF_hASCIZ_scans\scan7\h7+1LC8results	WT	2client	GVSRETQTSGIE	Off-target
2client\fromGMF\CF_hASCIZ_scans\scan8\h8+1LC8results	WT	2client	MTDNQTQTIDLL	unknown
2client\fromGMF\CF_hASCIZ_scans\scan9\h9+1LC8results	WT	2client	SSNLPAQTLDHR	nonbinder
2client\fromGMF\CF_moretrunQTs\Q5\QT5+1LC8results	WT	2client	EELGLSHIQTQTHW	binder
2client\fromGMF\CF_moretrunQTs\Q6\QT6+1LC8results	WT	2client	WPDGLYNTQHTQTCD	binder
2client\fromGMF\CF_moretrunQTs\Q7\QT7+1LC8results	WT	2client	EPDNFQSTCTQTRW	binder
2client\fromGMF\CF_moretrunQTs\QT1\hQT1+1LC8results	WT	2client	YMSSQKLDMETQTEE	binder
2client\fromGMF\CF_moretrunQTs\QT1\hQT1+1LC8results	WT	2client	YMSSQKLDMETQTEE	Off-target
2client\fromGMF\CF_QT2-4AAA+1LC8\QT2-4AAA+1LC8results	AAA	2client	MLAPLLRDIEAAAPDTRGDIGAAADDFPEEQEPVAVGSHFHAYSETEPMFDLQTSAHMYAAACDDLFEEL	nonbinder
2client\fromGMF\CF_QT2-4scans\CF_16AAQTscans\scan1\scanresults	WT	2client	MLAPLLRDIETQTPDT	binder
2client\fromGMF\CF_QT2-4scans\CF_16AAQTscans\scan2\scanresults	WT	2client	IETQTPDTRGDIGTMT	binder
2client\fromGMF\CF_QT2-4scans\CF_16AAQTscans\scan2\scanresults	WT	2client	IETQTPDTRGDIGTMT	Off-target
2client\fromGMF\CF_QT2-4scans\CF_16AAQTscans\scan3\scanresults	WT	2client	RGDIGTMTDDFPEEQE	binder
2client\fromGMF\CF_QT2-4scans\CF_16AAQTscans\scan4\scanresults	WT	2client	DDFPEEQEPVAV	nonbinder
2client\fromGMF\CF_QT2-4scans\CF_16AAQTscans\scan5\100scan5results	WT	2client	PVAVGSHFHAYSETEP	nonbinder
2client\fromGMF\CF_QT2-4scans\CF_16AAQTscans\scan5\scanresults	WT	2client	PVAVGSHFHAYSETEP	nonbinder
2client\fromGMF\CF_QT2-4scans\CF_16AAQTscans\scan6\scanresults	WT	2client	HAYSETEPMFDLQTSA	nonbinder
2client\fromGMF\CF_QT2-4scans\CF_16AAQTscans\scan7\scanresults	WT	2client	MFDLQTSAHMYTQTCD	binder
2client\fromGMF\CF_QT2-4scans\CF_16AAQTscans\scan8\badscanresults	WT	2client	CDHMYTQTCDDLFEEL	unknown
2client\fromGMF\CF_QT2-4scans\CF_16AAQTscans\scan8\scanresults	WT	2client	SAHMYTQTCDDLFEEL	binder
2client\fromGMF\CF_QT2-4scans\CF_16AAQTscans\scan8\scanresults	WT	2client	SAHMYTQTCDDLFEEL	Off-target
2client\fromGMF\CF_QT2-4scans\CF_scan1\scan1results	WT	2client	MLAPLLRDIETQ	unknown
2client\fromGMF\CF_QT2-4scans\CF_scan10\QT2-4scan10results	WT	2client	MFDLQTSAHMYT	nonbinder
2client\fromGMF\CF_QT2-4scans\CF_scan11\QT2-4scan11results	WT	2client	QTCDDLFEEL	nonbinder
2client\fromGMF\CF_QT2-4scans\CF_scan2\QT2-4scan2results	WT	2client	RDIETQTPDTRG	binder
2client\fromGMF\CF_QT2-4scans\CF_scan3\QT2-4scan3results	WT	2client	TPDTRGDIGTMT	binder
2client\fromGMF\CF_QT2-4scans\CF_scan4\QT2-4scan4results	WT	2client	DIGTMTDDFPEE	unknown
2client\fromGMF\CF_QT2-4scans\CF_scan5\QT2-4scan5results	WT	2client	DDFPEEQEPVAV	nonbinder
2client\fromGMF\CF_QT2-4scans\CF_scan6\QT2-4scan6results	WT	2client	QEPVAVGSHFHA	nonbinder
2client\fromGMF\CF_QT2-4scans\CF_scan7\QT2-4scan7results	WT	2client	GSHFHAYSETEP	nonbinder
2client\fromGMF\CF_QT2-4scans\CF_scan8\QT2-4scan8results	WT	2client	YSETEPMFDLQT	nonbinder
2client\fromGMF\CF_QT2-4scans\CF_scan9\QT2-4scan9results	WT	2client	MFDLQTSAHMYT	nonbinder
2client\fromGMF\CF_QT23a4titrations\1LC8\QT23a4+1LC8results	WT	2client	MLAPLLRDIETQTPDTRGDIGTMTDDFPQARREELLAKKARLAEIKRQRELRAQQAGQTSAHMYTQTCDDLFEEL	1equ
2client\fromGMF\CF_QT23a4titrations\2LC8\QT23a4+2LC8results	WT	2client	MLAPLLRDIETQTPDTRGDIGTMTDDFPQARREELLAKKARLAEIKRQRELRAQQAGQTSAHMYTQTCDDLFEEL	2equ
2client\fromGMF\CF_QT23a4titrations\3LC8\QT23a4+3LC8results	WT	2client	MLAPLLRDIETQTPDTRGDIGTMTDDFPQARREELLAKKARLAEIKRQRELRAQQAGQTSAHMYTQTCDDLFEEL	3equ
2client\fromGMF\CF_QT2Mtrun+1LC8\QT2Mtrun+1LC8_output	WT	2client	LRDIETQTPDTR	binder
2client\fromGMF\CF_QT3Mtrun+1LC8\QT3Mtrun+1LC8results	WT	2client	RGDIGTMTDDFP	binder
2client\fromGMF\CF_QT4-6+3LC8\100repsQT4-6+3LC8results	WT	2client	GAMDMFDLQTSAHMYTQTCDDLFEELGLSHIQTQTHWPDGLYNTQHTQTCDEIMDELFPD	3equ
2client\fromGMF\CF_QT4-6+3LC8\QT4-6+3LC8results	WT	2client	GAMDMFDLQTSAHMYTQTCDDLFEELGLSHIQTQTHWPDGLYNTQHTQTCDEIMDELFPD	3equ
2client\fromGMF\CF_QT4Mtrun+1LC8\QT4Mtrun+1LC8results	WT	2client	SAHMYTQTCDDL	binder
2client\fromGMF\CF_QT4Mtrun+1LC8\QT4Mtrun+1LC8results	WT	2client	SAHMYTQTCDDL	Off-target
2client\fromGMF\CF_sens2+1LC8\sens2+1LC8results	WT	2client	SEKLRRQSRSRSRSRSRSPCSSQIDMEDADSNHSHRSLHSRSRSRSRSRSHSRSRSHSSSSSVELEVDSPP	nonbinder
2client\fromGMF\CF_zfh2+1LC8\zfh2+1LC8results	WT	2client	SMDIHHVGICPPGSAVVSQTLSTPGSAAPLSGQYTQHSFGALPSPQHLFAKSSSLTDFSPSTTPTP	nonbinder
2client\fromGMF\Colabfold_QT2+1LC8\QT2+1LC8results	WT	2client	MLAPLLRDIETQTPDTRGDIGAAADDFPEEQEPVAVGSHFHAYSETEPMFDLQTSAHMYAAACDDLFEEL	binder
2client\fromGMF\Colabfold_QT2+1LC8\QT2+1LC8results	WT	2client	MLAPLLRDIETQTPDTRGDIGAAADDFPEEQEPVAVGSHFHAYSETEPMFDLQTSAHMYAAACDDLFEEL	Off-target
2client\fromGMF\Colabfold_QT2-4+1LC8\100repsQT2-4+1LC8results	WT	2client	MLAPLLRDIETQTPDTRGDIGTMTDDFPEEQEPVAVGSHFHAYSETEPMFDLQTSAHMYTQTCDDLFEEL	1equ
2client\fromGMF\Colabfold_QT2-4+1LC8\QT2-4+1LC8results	WT	2client	MLAPLLRDIETQTPDTRGDIGTMTDDFPEEQEPVAVGSHFHAYSETEPMFDLQTSAHMYTQTCDDLFEEL	1equ
2client\fromGMF\Colabfold_QT2-4+2LC8\QT2-4+2LC8results	WT	2client	MLAPLLRDIETQTPDTRGDIGTMTDDFPEEQEPVAVGSHFHAYSETEPMFDLQTSAHMYTQTCDDLFEEL	2equ
2client\fromGMF\Colabfold_QT2-4+3LC8\QT2-4+3LC8results	WT	2client	MLAPLLRDIETQTPDTRGDIGTMTDDFPEEQEPVAVGSHFHAYSETEPMFDLQTSAHMYTQTCDDLFEEL	3equ
2client\fromGMF\Colabfold_QT2-4+3LC8more\QT2-4+3LC8moreresults	WT	2client	MLAPLLRDIETQTPDTRGDIGTMTDDFPEEQEPVAVGSHFHAYSETEPMFDLQTSAHMYTQTCDDLFEEL	3equ
2client\fromGMF\Colabfold_QT2truncated+1LC8\QT2truncated+1LC8results	WT	2client	LRDIETQTPD	binder
2client\fromGMF\Colabfold_QT3+1LC8\QT3+1LC8results	WT	2client	MLAPLLRDIEAAAPDTRGDIGTMTDDFPEEQEPVAVGSHFHAYSETEPMFDLQTSAHMYAAACDDLFEEL	binder
2client\fromGMF\Colabfold_QT3+1LC8\QT3+1LC8results	WT	2client	MLAPLLRDIEAAAPDTRGDIGTMTDDFPEEQEPVAVGSHFHAYSETEPMFDLQTSAHMYAAACDDLFEEL	Off-target
2client\fromGMF\Colabfold_QT4+1LC8\QT4+1LC8results	WT	2client	MLAPLLRDIEAAAPDTRGDIGAAADDFPEEQEPVAVGSHFHAYSETEPMFDLQTSAHMYTQTCDDLFEEL	binder
2client\fromGMF\Colabfold_QT4+1LC8\QT4+1LC8results	WT	2client	MLAPLLRDIEAAAPDTRGDIGAAADDFPEEQEPVAVGSHFHAYSETEPMFDLQTSAHMYTQTCDDLFEEL	Off-target
2client\fromGMF\newQT2trun\QT2Mtrun+1LC8results	WT	2client	LAPLLRDIETQTPDTRGDIG	binder
2client\fromGMF\newthreshold\CF_hASCIZ_scans\scan1\scanresults	WT	2client	PISTGVQVNFGK	binder
2client\fromGMF\newthreshold\CF_hASCIZ_scans\scan10\h10+1LC8results	WT	2client	ASNIQTQTEESE	binder
2client\fromGMF\newthreshold\CF_hASCIZ_scans\scan10\h10+1LC8results	WT	2client	ASNIQTQTEESE	Off-target
2client\fromGMF\newthreshold\CF_hASCIZ_scans\scan11\h11+1LC8results	WT	2client	ESELSTMTTEPV	nonbinder
2client\fromGMF\newthreshold\CF_hASCIZ_scans\scan12\h12+1LC8results	WT	2client	SLDIETQTDFLL	binder
2client\fromGMF\newthreshold\CF_hASCIZ_scans\scan12\h12+1LC8results	WT	2client	SLDIETQTDFLL	Off-target
2client\fromGMF\newthreshold\CF_hASCIZ_scans\scan13\h13+1LC8results	WT	2client	MFDTQTQTDLNF	binder
2client\fromGMF\newthreshold\CF_hASCIZ_scans\scan13\h13+1LC8results	WT	2client	MFDTQTQTDLNF	Off-target
2client\fromGMF\newthreshold\CF_hASCIZ_scans\scan14\h14+1LC8results	WT	2client	SSDTETQTEGVS	binder
2client\fromGMF\newthreshold\CF_hASCIZ_scans\scan14\h14+1LC8results	WT	2client	SSDTETQTEGVS	Off-target
2client\fromGMF\newthreshold\CF_hASCIZ_scans\scan15\h15+1LC8results	WT	2client	LNSTETQTMSSG	binder
2client\fromGMF\newthreshold\CF_hASCIZ_scans\scan15\h15+1LC8results	WT	2client	LNSTETQTMSSG	Off-target
2client\fromGMF\newthreshold\CF_hASCIZ_scans\scan16\h16+1LC8results	WT	2client	FTSNETQTAMDD	binder
2client\fromGMF\newthreshold\CF_hASCIZ_scans\scan17\h17+1LC8results	WT	2client	FSSVETQTSAEP	binder
2client\fromGMF\newthreshold\CF_hASCIZ_scans\scan4\h4+1LC8results	WT	2client	DLSFDSQVSLPI	nonbinder
2client\fromGMF\newthreshold\CF_hASCIZ_scans\scan5\h5+1LC8results	WT	2client	PISVHTQTFLPS	binder
2client\fromGMF\newthreshold\CF_hASCIZ_scans\scan6\h6+1LC8results	WT	2client	TSSIAAQTDAFM	binder
2client\fromGMF\newthreshold\CF_hASCIZ_scans\scan7\h7+1LC8results	WT	2client	GVSRETQTSGIE	binder
2client\fromGMF\newthreshold\CF_hASCIZ_scans\scan7\h7+1LC8results	WT	2client	GVSRETQTSGIE	Off-target
2client\fromGMF\newthreshold\CF_hASCIZ_scans\scan9\h9+1LC8results	WT	2client	SSNLPAQTLDHR	nonbinder
2client\fromGMF\newthreshold\dASCIZ\QT1Trun\QT1+1LC8results	WT	2client	KLDMETQTEEDD	binder
2client\fromGMF\newthreshold\dASCIZ\QT1Trun\QT1+1LC8results	WT	2client	KLDMETQTEEDD	Off-target
2client\fromGMF\newthreshold\dASCIZ\QT5Trun\QT5+1LC8results	WT	2client	LSHIQTQTHWPD	binder
2client\fromGMF\newthreshold\dASCIZ\QT5Trun\QT5+1LC8results	WT	2client	LSHIQTQTHWPD	Off-target
2client\fromGMF\newthreshold\dASCIZ\QT6Trun\QT6+1LC8results	WT	2client	YNTQHTQTCDEI	binder
2client\fromGMF\newthreshold\dASCIZ\QT6Trun\QT6+1LC8results	WT	2client	YNTQHTQTCDEI	Off-target
2client\fromGMF\newthreshold\dASCIZ\QT7Trun\QT7+1LC8results	WT	2client	FQSTCTQTRWLD	binder
2client\fromGMF\newthreshold\dASCIZ\QT7Trun\QT7+1LC8results	WT	2client	FQSTCTQTRWLD	Off-target
2client\fromGMF\newthreshold\Nathanpaperpeptides\BCL2L11\1LC8results	WT	2client	APMSCDKSTQTPSP	binder
2client\fromGMF\newthreshold\Nathanpaperpeptides\BSN\1LC8results	WT	2client	PRATAEFSTQTPSP	binder
2client\fromGMF\newthreshold\Nathanpaperpeptides\CAPRIN2\1LC8results	WT	2client	NQSFTTASTQTPPQ	binder
2client\fromGMF\newthreshold\Nathanpaperpeptides\CCL2\1LC8results	WT	2client	YDSMDHLDKQTQTPKT	binder
2client\fromGMF\newthreshold\Nathanpaperpeptides\CCL7\1LC8results	WT	2client	QDFMKHLDKKTQTPKL	binder
2client\fromGMF\newthreshold\Nathanpaperpeptides\CIZ1\1LC8results	WT	2client	ARAGRSVSTQTGSM	binder
2client\fromGMF\newthreshold\Nathanpaperpeptides\E4\1LC8results	WT	2client	YLQGRQEDKQTQTPPP	binder
2client\fromGMF\newthreshold\Nathanpaperpeptides\GLCCI1\1LC8results	WT	2client	SSSTRSIDTQTPSV	binder
2client\fromGMF\newthreshold\Nathanpaperpeptides\ICE1\1LC8results	WT	2client	EKELRHIGTQISSD	binder
2client\fromGMF\newthreshold\Nathanpaperpeptides\MAST1\1LC8results	WT	2client	YGCTRHQSVQTEDG	binder
2client\fromGMF\newthreshold\Nathanpaperpeptides\MUC3A\1LC8results	WT	2client	PVLTSATGTQTSPA	binder
2client\fromGMF\newthreshold\Nathanpaperpeptides\MUC4\1LC8results	WT	2client	DDNHWTRSTQTTRE	binder
2client\fromGMF\newthreshold\Nathanpaperpeptides\SLC9A2\1LC8results	WT	2client	DDHSREKGTQTSGD	binder
2client\fromGMF\newthreshold\Nathanpaperpeptides\SON\1LC8results	WT	2client	YSRKSRCVSVQTDPT	binder
2client\fromGMF\newthreshold\Nathanpaperpeptides\SPAG5\1LC8results	WT	2client	HPETQDSSTQTDTS	binder
2client\fromGMF\newthreshold\Nathanpaperpeptides\VP4\1LC8results	WT	2client	YVTNSLNDISTQTSTI	binder
2client\fromGMF\newthreshold\Nathanpaperpeptides\VP4\1LC8results	WT	2client	YVTNSLNDISTQTSTI	Off-target
2client\fromGMF\newthreshold\Nathanpaperpeptides\ZFPM1\1LC8results	WT	2client	PAPPSYSDKGVQTPSK	binder
2client\fromGMF\newthreshold\Nathpaperpeptidesnonbinders\NNB1\1LC8results	WT	2client	IVSCVSVSTQTASD	nonbinder
2client\fromGMF\newthreshold\Nathpaperpeptidesnonbinders\NNB10\1LC8results	WT	2client	LPRKVDTAAQTNSR	nonbinder
2client\fromGMF\newthreshold\Nathpaperpeptidesnonbinders\NNB11\1LC8results	WT	2client	KTLTFSGSSQTVTP	nonbinder
2client\fromGMF\newthreshold\Nathpaperpeptidesnonbinders\NNB12\1LC8results	WT	2client	TEAKDQCSTQTDFN	nonbinder
2client\fromGMF\newthreshold\Nathpaperpeptidesnonbinders\NNB13\1LC8results	WT	2client	RSFVLPVESTQDVSSQ	nonbinder
2client\fromGMF\newthreshold\Nathpaperpeptidesnonbinders\NNB14\1LC8results	WT	2client	SFRHPGYSTQTHVN	nonbinder
2client\fromGMF\newthreshold\Nathpaperpeptidesnonbinders\NNB15\1LC8results	WT	2client	TQDDYFKDKRVHHFRRS	nonbinder
2client\fromGMF\newthreshold\Nathpaperpeptidesnonbinders\NNB16\1LC8results	WT	2client	VRTLPRFQTQVDRR	nonbinder
2client\fromGMF\newthreshold\Nathpaperpeptidesnonbinders\NNB17\1LC8results	WT	2client	KITFTKPSTQTTNT	nonbinder
2client\fromGMF\newthreshold\Nathpaperpeptidesnonbinders\NNB18\1LC8results	WT	2client	CLKETLQITQTEVQ	nonbinder
2client\fromGMF\newthreshold\Nathpaperpeptidesnonbinders\NNB19\1LC8results	WT	2client	TTLPVLTSTATKST	nonbinder
2client\fromGMF\newthreshold\Nathpaperpeptidesnonbinders\NNB2\1LC8results	WT	2client	STQTPSPAPASDMP	nonbinder
2client\fromGMF\newthreshold\Nathpaperpeptidesnonbinders\NNB20\1LC8results	WT	2client	AASLIQKMLQTDPTAR	nonbinder
2client\fromGMF\newthreshold\Nathpaperpeptidesnonbinders\NNB21\1LC8results	WT	2client	DDHSGNAQVTQTKFD	nonbinder
2client\fromGMF\newthreshold\Nathpaperpeptidesnonbinders\NNB22\1LC8results	WT	2client	ITSYNSQGTQLTVE	nonbinder
2client\fromGMF\newthreshold\Nathpaperpeptidesnonbinders\NNB23\1LC8results	WT	2client	LQETLTTSSQANLS	nonbinder
2client\fromGMF\newthreshold\Nathpaperpeptidesnonbinders\NNB24\1LC8results	WT	2client	KHSGRQLTLQHHMG	nonbinder
2client\fromGMF\newthreshold\Nathpaperpeptidesnonbinders\NNB25\1LC8results	WT	2client	NQSFLRTPIQRTPH	nonbinder
2client\fromGMF\newthreshold\Nathpaperpeptidesnonbinders\NNB26\1LC8results	WT	2client	EGYRGTANTTTAAYLA	nonbinder
2client\fromGMF\newthreshold\Nathpaperpeptidesnonbinders\NNB27\1LC8results	WT	2client	PLQATISKSQTNPV	nonbinder
2client\fromGMF\newthreshold\Nathpaperpeptidesnonbinders\NNB28\1LC8results	WT	2client	SSRSAFSPLQPNAS	nonbinder
2client\fromGMF\newthreshold\Nathpaperpeptidesnonbinders\NNB29\1LC8results	WT	2client	TLQQPLELTASQLPAG	nonbinder
2client\fromGMF\newthreshold\Nathpaperpeptidesnonbinders\NNB3\1LC8results	WT	2client	DERLMCTGSQTFDD	nonbinder
2client\fromGMF\newthreshold\Nathpaperpeptidesnonbinders\NNB30\1LC8results	WT	2client	RAAALPEETRSSRR	nonbinder
2client\fromGMF\newthreshold\Nathpaperpeptidesnonbinders\NNB4\1LC8results	WT	2client	TPTPTPTGTQTPTT	nonbinder
2client\fromGMF\newthreshold\Nathpaperpeptidesnonbinders\NNB5\1LC8results	WT	2client	SMATPSSSTQTSGT	nonbinder
2client\fromGMF\newthreshold\Nathpaperpeptidesnonbinders\NNB6\1LC8results	WT	2client	TLVSTASGTQTVFP	nonbinder
2client\fromGMF\newthreshold\Nathpaperpeptidesnonbinders\NNB7\1LC8results	WT	2client	RGDGSDVSSQTPQT	nonbinder
2client\fromGMF\newthreshold\Nathpaperpeptidesnonbinders\NNB8\1LC8results	WT	2client	DDPMYSSQTQTYGD	nonbinder
2client\fromGMF\newthreshold\Nathpaperpeptidesnonbinders\NNB9\1LC8results	WT	2client	ESGDGNTGTQTNGL	nonbinder
2client\fromGMF\newthreshold\SarahpaperdASCIZpeptides\QT1p\1LC8results	WT	2client	YMSSQKLDMETQTEE	binder
2client\fromGMF\newthreshold\SarahpaperdASCIZpeptides\QT1p\1LC8results	WT	2client	YMSSQKLDMETQTEE	Off-target
2client\fromGMF\newthreshold\SarahpaperdASCIZpeptides\QT2p\1LC8results	WT	2client	YLAPLLRDIETQTPD	binder
2client\fromGMF\newthreshold\SarahpaperdASCIZpeptides\QT4p\1LC8results	WT	2client	DLQTSAHMYTQTCD	binder
2client\fromGMF\newthreshold\SarahpaperdASCIZpeptides\QT4p\1LC8results	WT	2client	DLQTSAHMYTQTCD	Off-target
2client\fromGMF\newthreshold\SarahpaperdASCIZpeptides\QT5p\1LC8results	WT	2client	EELGLSHIQTQTHW	binder
2client\fromGMF\newthreshold\SarahpaperdASCIZpeptides\QT5p\1LC8results	WT	2client	EELGLSHIQTQTHW	Off-target
2client\fromGMF\newthreshold\SarahpaperdASCIZpeptides\QT6p\1LC8results	WT	2client	WPDGLYNTQHTQTCD	binder
2client\fromGMF\newthreshold\SarahpaperdASCIZpeptides\QT7p\1LC8results	WT	2client	EPDNFQSTCTQTRW	binder
2client\hASCIZ-parsed\hASCIZ_1-16_output	WT	2client	MAASEAAAAAGSAALA	unknown
2client\hASCIZ-parsed\hASCIZ_105-120_output	WT	2client	LVKSHRLQDGIVNPTI	unknown
2client\hASCIZ-parsed\hASCIZ_113-128_output	WT	2client	DGIVNPTIRKDLKTGP	unknown
2client\hASCIZ-parsed\hASCIZ_121-136_output	WT	2client	RKDLKTGPKFYCCPIE	unknown
2client\hASCIZ-parsed\hASCIZ_129-144_output	WT	2client	KFYCCPIEGCPRGPER	unknown
2client\hASCIZ-parsed\hASCIZ_137-152_output	WT	2client	GCPRGPERPFSQFSLV	unknown
2client\hASCIZ-parsed\hASCIZ_145-160_output	WT	2client	PFSQFSLVKQHFMKMH	unknown
2client\hASCIZ-parsed\hASCIZ_153-168_output	WT	2client	KQHFMKMHAEKKHKCS	unknown
2client\hASCIZ-parsed\hASCIZ_161-176_output	WT	2client	AEKKHKCSKCSNSYGT	unknown
2client\hASCIZ-parsed\hASCIZ_169-184_output	WT	2client	KCSNSYGTEWDLKRHA	unknown
2client\hASCIZ-parsed\hASCIZ_17-32_output	WT	2client	AGARAVPAATTGAAAA	unknown
2client\hASCIZ-parsed\hASCIZ_177-192_output	WT	2client	EWDLKRHAEDCGKTFR	unknown
2client\hASCIZ-parsed\hASCIZ_185-200_output	WT	2client	EDCGKTFRCTCGCPYA	unknown
2client\hASCIZ-parsed\hASCIZ_193-208_output	WT	2client	CTCGCPYASRTALQSH	unknown
2client\hASCIZ-parsed\hASCIZ_201-216_output	WT	2client	SRTALQSHIYRTGHEI	unknown
2client\hASCIZ-parsed\hASCIZ_209-224_output	WT	2client	IYRTGHEIPAEHRDPP	unknown
2client\hASCIZ-parsed\hASCIZ_217-232_output	WT	2client	PAEHRDPPSKKRKMEN	unknown
2client\hASCIZ-parsed\hASCIZ_225-240_output	WT	2client	SKKRKMENCAQNQKLS	unknown
2client\hASCIZ-parsed\hASCIZ_233-248_output	WT	2client	CAQNQKLSNKTIESLN	unknown
2client\hASCIZ-parsed\hASCIZ_241-256_output	WT	2client	NKTIESLNNQPIPRPD	unknown
2client\hASCIZ-parsed\hASCIZ_249-264_output	WT	2client	NQPIPRPDTQELEASE	unknown
2client\hASCIZ-parsed\hASCIZ_25-40_output	WT	2client	ATTGAAAAASGPWVPP	unknown
2client\hASCIZ-parsed\hASCIZ_257-272_output	WT	2client	TQELEASEIKLEPSFE	unknown
2client\hASCIZ-parsed\hASCIZ_265-280_output	WT	2client	IKLEPSFEDSCGSNTD	unknown
2client\hASCIZ-parsed\hASCIZ_273-288_output	WT	2client	DSCGSNTDKQTLTTPP	unknown
2client\hASCIZ-parsed\hASCIZ_281-296_output	WT	2client	KQTLTTPPRYPQKLLL	unknown
2client\hASCIZ-parsed\hASCIZ_289-304_output	WT	2client	RYPQKLLLPKPKVALV	unknown
2client\hASCIZ-parsed\hASCIZ_297-312_output	WT	2client	PKPKVALVKLPVMQFS	unknown
2client\hASCIZ-parsed\hASCIZ_305-320_output	WT	2client	KLPVMQFSVMPVFVPT	unknown
2client\hASCIZ-parsed\hASCIZ_313-328_output	WT	2client	VMPVFVPTADSSAQPV	unknown
2client\hASCIZ-parsed\hASCIZ_321-336_output	WT	2client	ADSSAQPVVLGVDQGS	unknown
2client\hASCIZ-parsed\hASCIZ_329-344_output	WT	2client	VLGVDQGSATGAVHLM	unknown
2client\hASCIZ-parsed\hASCIZ_33-48_output	WT	2client	ASGPWVPPGPRLRGSR	unknown
2client\hASCIZ-parsed\hASCIZ_337-352_output	WT	2client	ATGAVHLMPLSVGTLI	unknown
2client\hASCIZ-parsed\hASCIZ_345-360_output	WT	2client	PLSVGTLILGLDSEAC	unknown
2client\hASCIZ-parsed\hASCIZ_353-368_output	WT	2client	LGLDSEACSLKESLPL	unknown
2client\hASCIZ-parsed\hASCIZ_361-376_output	WT	2client	SLKESLPLFKIANPIA	unknown
2client\hASCIZ-parsed\hASCIZ_369-384_output	WT	2client	FKIANPIAGEPISTGV	unknown
2client\hASCIZ-parsed\hASCIZ_377-392_output	WT	2client	GEPISTGVQVNFGKSP	unknown
2client\hASCIZ-parsed\hASCIZ_385-400_output	WT	2client	QVNFGKSPSNPLQELG	unknown
2client\hASCIZ-parsed\hASCIZ_393-408_output	WT	2client	SNPLQELGNTCQKNSI	unknown
2client\hASCIZ-parsed\hASCIZ_401-416_output	WT	2client	NTCQKNSISSINVQTD	unknown
2client\hASCIZ-parsed\hASCIZ_409-424_output	WT	2client	SSINVQTDLSYASQNF	unknown
2client\hASCIZ-parsed\hASCIZ_41-56_output	WT	2client	GPRLRGSRPRPAGATQ	unknown
2client\hASCIZ-parsed\hASCIZ_417-432_output	WT	2client	LSYASQNFIPSAQWAT	unknown
2client\hASCIZ-parsed\hASCIZ_425-440_output	WT	2client	IPSAQWATADSSVSSC	unknown
2client\hASCIZ-parsed\hASCIZ_433-448_output	WT	2client	ADSSVSSCSQTDLSFD	unknown
2client\hASCIZ-parsed\hASCIZ_441-456_output	WT	2client	SQTDLSFDSQVSLPIS	unknown
2client\hASCIZ-parsed\hASCIZ_449-464_output	WT	2client	SQVSLPISVHTQTFLP	unknown
2client\hASCIZ-parsed\hASCIZ_457-472_output	WT	2client	VHTQTFLPSSKVTSSI	unknown
2client\hASCIZ-parsed\hASCIZ_465-480_output	WT	2client	SSKVTSSIAAQTDAFM	unknown
2client\hASCIZ-parsed\hASCIZ_473-488_output	WT	2client	AAQTDAFMDTCFQSGG	unknown
2client\hASCIZ-parsed\hASCIZ_481-496_output	WT	2client	DTCFQSGGVSRETQTS	unknown
2client\hASCIZ-parsed\hASCIZ_489-504_output	WT	2client	VSRETQTSGIESPTDD	unknown
2client\hASCIZ-parsed\hASCIZ_49-64_output	WT	2client	PRPAGATQQPAVPAPP	unknown
2client\hASCIZ-parsed\hASCIZ_497-512_output	WT	2client	GIESPTDDHVQMDQAG	unknown
2client\hASCIZ-parsed\hASCIZ_505-520_output	WT	2client	HVQMDQAGMCGDIFES	unknown
2client\hASCIZ-parsed\hASCIZ_513-528_output	WT	2client	MCGDIFESVHSSYNVA	unknown
2client\hASCIZ-parsed\hASCIZ_521-536_output	WT	2client	VHSSYNVATGNIISNS	unknown
2client\hASCIZ-parsed\hASCIZ_529-544_output	WT	2client	TGNIISNSLVAETVTH	unknown
2client\hASCIZ-parsed\hASCIZ_537-552_output	WT	2client	LVAETVTHSLLPQNEP	unknown
2client\hASCIZ-parsed\hASCIZ_545-560_output	WT	2client	SLLPQNEPKTLNQDIE	unknown
2client\hASCIZ-parsed\hASCIZ_553-568_output	WT	2client	KTLNQDIEKSAPIINF	unknown
2client\hASCIZ-parsed\hASCIZ_561-576_output	WT	2client	KSAPIINFSAQNSMLP	unknown
2client\hASCIZ-parsed\hASCIZ_569-584_output	WT	2client	SAQNSMLPSQNMTDNQ	unknown
2client\hASCIZ-parsed\hASCIZ_57-72_output	WT	2client	QPAVPAPPAGELIQPS	unknown
2client\hASCIZ-parsed\hASCIZ_577-592_output	WT	2client	SQNMTDNQTQTIDLLS	unknown
2client\hASCIZ-parsed\hASCIZ_585-600_output	WT	2client	TQTIDLLSDLENILSS	unknown
2client\hASCIZ-parsed\hASCIZ_593-608_output	WT	2client	DLENILSSNLPAQTLD	unknown
2client\hASCIZ-parsed\hASCIZ_601-616_output	WT	2client	NLPAQTLDHRSLLSDT	unknown
2client\hASCIZ-parsed\hASCIZ_609-624_output	WT	2client	HRSLLSDTNPGPDTQL	unknown
2client\hASCIZ-parsed\hASCIZ_617-632_output	WT	2client	NPGPDTQLPSGPAQNP	unknown
2client\hASCIZ-parsed\hASCIZ_625-640_output	WT	2client	PSGPAQNPGIDFDIEE	unknown
2client\hASCIZ-parsed\hASCIZ_633-648_output	WT	2client	GIDFDIEEFFSASNIQ	unknown
2client\hASCIZ-parsed\hASCIZ_641-656_output	WT	2client	FFSASNIQTQTEESEL	unknown
2client\hASCIZ-parsed\hASCIZ_649-664_output	WT	2client	TQTEESELSTMTTEPV	unknown
2client\hASCIZ-parsed\hASCIZ_65-80_output	WT	2client	AGELIQPSVSELSRAV	unknown
2client\hASCIZ-parsed\hASCIZ_657-672_output	WT	2client	STMTTEPVLESLDIET	unknown
2client\hASCIZ-parsed\hASCIZ_665-680_output	WT	2client	LESLDIETQTDFLLAD	unknown
2client\hASCIZ-parsed\hASCIZ_673-688_output	WT	2client	QTDFLLADTSAQSYGC	unknown
2client\hASCIZ-parsed\hASCIZ_681-696_output	WT	2client	TSAQSYGCRGNSNFLG	unknown
2client\hASCIZ-parsed\hASCIZ_689-704_output	WT	2client	RGNSNFLGLEMFDTQT	unknown
2client\hASCIZ-parsed\hASCIZ_697-712_output	WT	2client	LEMFDTQTQTDLNFFL	unknown
2client\hASCIZ-parsed\hASCIZ_705-720_output	WT	2client	QTDLNFFLDSSPHLPL	unknown
2client\hASCIZ-parsed\hASCIZ_713-728_output	WT	2client	DSSPHLPLGSILKHSS	unknown
2client\hASCIZ-parsed\hASCIZ_721-736_output	WT	2client	GSILKHSSFSVSTDSS	unknown
2client\hASCIZ-parsed\hASCIZ_729-744_output	WT	2client	FSVSTDSSDTETQTEG	unknown
2client\hASCIZ-parsed\hASCIZ_73-88_output	WT	2client	VSELSRAVRTNILCTV	unknown
2client\hASCIZ-parsed\hASCIZ_737-752_output	WT	2client	DTETQTEGVSTAKNIP	unknown
2client\hASCIZ-parsed\hASCIZ_745-760_output	WT	2client	VSTAKNIPALESKVQL	unknown
2client\hASCIZ-parsed\hASCIZ_753-768_output	WT	2client	ALESKVQLNSTETQTM	unknown
2client\hASCIZ-parsed\hASCIZ_761-776_output	WT	2client	NSTETQTMSSGFETLG	unknown
2client\hASCIZ-parsed\hASCIZ_769-784_output	WT	2client	SSGFETLGSLFFTSNE	unknown
2client\hASCIZ-parsed\hASCIZ_777-792_output	WT	2client	SLFFTSNETQTAMDDF	unknown
2client\hASCIZ-parsed\hASCIZ_785-800_output	WT	2client	TQTAMDDFLLADLAWN	unknown
2client\hASCIZ-parsed\hASCIZ_793-808_output	WT	2client	LLADLAWNTMESQFSS	unknown
2client\hASCIZ-parsed\hASCIZ_801-816_output	WT	2client	TMESQFSSVETQTSAE	unknown
2client\hASCIZ-parsed\hASCIZ_808-823_output	WT	2client	SVETQTSAEPHTVSNF	unknown
2client\hASCIZ-parsed\hASCIZ_81-96_output	WT	2client	RTNILCTVRGCGKILP	unknown
2client\hASCIZ-parsed\hASCIZ_89-104_output	WT	2client	RGCGKILPNSPALNMH	unknown
2client\hASCIZ-parsed\hASCIZ_9-24_output	WT	2client	AAGSAALAAGARAVPA	unknown
2client\hASCIZ-parsed\hASCIZ_97-112_output	WT	2client	NSPALNMHLVKSHRLQ	unknown
postGMF-runs\1client\AAA_analysis\53BP1\53BP1_QT1_output	AAA	1client	RPSQNNIGAAAMECSL	nonbinder
postGMF-runs\1client\AAA_analysis\53BP1\53BP1_QT2_output	AAA	1client	VPETVSAAAAAIKNVC	nonbinder
postGMF-runs\1client\AAA_analysis\53BP1\53BP1_QT3_output	AAA	1client	NFGKQDATAAAERGSG	nonbinder
postGMF-runs\1client\AAA_analysis\gerdos_peptides\AMBRA1_output	AAA	1client	PATSVTSQGAAALALQLQ	nonbinder
postGMF-runs\1client\AAA_analysis\gerdos_peptides\BCAS1_output	AAA	1client	GPKRMLDAQAAADPVSIG	nonbinder
postGMF-runs\1client\AAA_analysis\gerdos_peptides\FAM83D-1_output	AAA	1client	QSRKAIDAAAAAEPGEEM	nonbinder
postGMF-runs\1client\AAA_analysis\gerdos_peptides\FAM83D-2_output	AAA	1client	TTIWSRSTTAAADMDENI	nonbinder
postGMF-runs\1client\AAA_analysis\gerdos_peptides\FAM83D-3_output	AAA	1client	PGLSVSEVGAAAQTSITTAC	nonbinder
postGMF-runs\1client\AAA_analysis\gerdos_peptides\METT-10_output	AAA	1client	NNLNAWDNAAAAYFPLPN	nonbinder
postGMF-runs\1client\AAA_analysis\gerdos_peptides\MYZAP_output	AAA	1client	AKTEVETREAAAGCDLLP	nonbinder
postGMF-runs\1client\AAA_analysis\gerdos_peptides\UHRF1BP1L_output	AAA	1client	KKQRSVTQAAAASPGVPW	nonbinder
postGMF-runs\1client\AAA_analysis\Jespersens_peptides\binders\BSNIII_output	AAA	1client	PSPMVAQGAAAPHR	nonbinder
postGMF-runs\1client\AAA_analysis\Jespersens_peptides\binders\BSNI_output	AAA	1client	SPTTANYGAAAEDL	nonbinder
postGMF-runs\1client\AAA_analysis\Jespersens_peptides\binders\HTATSF1_output	AAA	1client	YGDGKDGDAAADAG	nonbinder
postGMF-runs\1client\AAA_analysis\Jespersens_peptides\binders\OFD1_output	AAA	1client	AKESCNMEAAASST	nonbinder
postGMF-runs\1client\AAA_analysis\Jespersens_peptides\binders\RAVL_output	AAA	1client	EIHGISRMAAAPQR	nonbinder
postGMF-runs\1client\AAA_analysis\Jespersens_peptides\binders\VP35_output	AAA	1client	NPKTRNSQAAADPI	nonbinder
postGMF-runs\1client\AAA_analysis\Jespersens_peptides\non-binders\CCL25_output	AAA	1client	NKVFAKLHHNAAAFQA	nonbinder
postGMF-runs\1client\AAA_analysis\Jespersens_peptides\non-binders\DNLJ2_output	AAA	1client	YKIEIPAAAPSCGSK	nonbinder
postGMF-runs\1client\AAA_analysis\Jespersens_peptides\non-binders\EIF2S2_output	AAA	1client	KPFMLDEEGDAAAEET	nonbinder
postGMF-runs\1client\AAA_analysis\Jespersens_peptides\non-binders\EIF3C_output	AAA	1client	YELMASLDQPAAAVVM	nonbinder
postGMF-runs\1client\AAA_analysis\Jespersens_peptides\non-binders\EIF4G3_output	AAA	1client	DFTPAFADFGAAAPGG	nonbinder
postGMF-runs\1client\AAA_analysis\Jespersens_peptides\non-binders\FMN2_output	AAA	1client	YHHRILEAKSAAASPT	nonbinder
postGMF-runs\1client\AAA_analysis\Jespersens_peptides\non-binders\ILK_output	AAA	1client	MDDIFAAAREGN	nonbinder
postGMF-runs\1client\AAA_analysis\Jespersens_peptides\non-binders\ITGAX_output	AAA	1client	YGQIAPENGAAAPSP	nonbinder
postGMF-runs\1client\AAA_analysis\Jespersens_peptides\non-binders\PRSS36_output	AAA	1client	YGPDGEETEAAACPP	nonbinder
postGMF-runs\1client\AAA_analysis\Jespersens_peptides\non-binders\TMV_output	AAA	1client	AQPKQKLDTSAAAEYP	nonbinder
postGMF-runs\1client\AAA_analysis\Jespersens_peptides\non-binders\ZZZ3_output	AAA	1client	KSVAENGDTDAAASMF	nonbinder
postGMF-runs\1client\AAA_analysis\Jespersens_peptides\weak_binders\ARAP3_output	AAA	1client	SPSPTGLPAAAPGF	nonbinder
postGMF-runs\1client\AAA_analysis\Jespersens_peptides\weak_binders\GP1BA_output	AAA	1client	GQGAALTTAAAATHLE	nonbinder
postGMF-runs\1client\AAA_analysis\Jespersens_peptides\weak_binders\NIN_output	AAA	1client	ELENRTSEAAAPQG	nonbinder
postGMF-runs\1client\AAA_analysis\Jespersens_peptides\weak_binders\OTOF_output	AAA	1client	PELTSSTEAAAEQA	nonbinder
postGMF-runs\1client\AAA_analysis\Jespersens_peptides\weak_binders\ROR1_output	AAA	1client	DDSGGNATAAATSD	nonbinder
postGMF-runs\1client\AAA_analysis\Jespersens_peptides\weak_binders\TOGARAM_output	AAA	1client	SKTQQTFGAAAECT	nonbinder
postGMF-runs\1client\AAA_analysis\LC8hub_peptides\AMOTL1_output	AAA	1client	KTGSKDSSAAADKSAE	nonbinder
postGMF-runs\1client\AAA_analysis\LC8hub_peptides\AMOTL2_output	AAA	1client	KHGSRDGSAAAEGPPD	nonbinder
postGMF-runs\1client\AAA_analysis\LC8hub_peptides\AMOT_output	AAA	1client	KTGSRDCSAAAERGTE	nonbinder
postGMF-runs\1client\AAA_analysis\LC8hub_peptides\Ana2-1_output	AAA	1client	DVLTICAGAAADPFNP	nonbinder
postGMF-runs\1client\AAA_analysis\LC8hub_peptides\Ana2-2_output	AAA	1client	SKASSTTGAAADILTT	nonbinder
postGMF-runs\1client\AAA_analysis\LC8hub_peptides\BMF_output	AAA	1client	PTSQEDKAAAALSPAS	nonbinder
postGMF-runs\1client\AAA_analysis\LC8hub_peptides\CDADC1_output	AAA	1client	ARAGRSVSAAAGSMTG	nonbinder
postGMF-runs\1client\AAA_analysis\LC8hub_peptides\CHICA-1_output	AAA	1client	TIWSRSTTAAADMDEN	nonbinder
postGMF-runs\1client\AAA_analysis\LC8hub_peptides\CHICA-2_output	AAA	1client	GLSVSEVGAAASITTA	nonbinder
postGMF-runs\1client\AAA_analysis\LC8hub_peptides\CHICA-3_output	AAA	1client	SRKAIDAAAAAEPGEE	nonbinder
postGMF-runs\1client\AAA_analysis\LC8hub_peptides\CITFA_output	AAA	1client	MPEVGAAAYWYDF	nonbinder
postGMF-runs\1client\AAA_analysis\LC8hub_peptides\DLGAP1-1_output	AAA	1client	KNRCLSIGAAADDAEE	nonbinder
postGMF-runs\1client\AAA_analysis\LC8hub_peptides\DLGAP1-2_output	AAA	1client	PSKFQSVGAAAEEEKC	nonbinder
postGMF-runs\1client\AAA_analysis\LC8hub_peptides\DNMT3A_output	AAA	1client	LLVLKDLGAAADRYIA	nonbinder
postGMF-runs\1client\AAA_analysis\LC8hub_peptides\Dync1i1_output	AAA	1client	EVVSYSKEAAAPLATH	nonbinder
postGMF-runs\1client\AAA_analysis\LC8hub_peptides\E183L_output	AAA	1client	TVTTQNTAAAAMSAIE	nonbinder
postGMF-runs\1client\AAA_analysis\LC8hub_peptides\egl_output	AAA	1client	VVKLVDAEAAALSTGD	nonbinder
postGMF-runs\1client\AAA_analysis\LC8hub_peptides\EML3_output	AAA	1client	TPSLVSRGAAAETEVE	nonbinder
postGMF-runs\1client\AAA_analysis\LC8hub_peptides\GCOM1_output	AAA	1client	EVETREIGAAADLLPR	nonbinder
postGMF-runs\1client\AAA_analysis\LC8hub_peptides\Gphn_output	AAA	1client	HKQTEDKGAAAEEEEE	nonbinder
postGMF-runs\1client\AAA_analysis\LC8hub_peptides\HerpV-U19-1_output	AAA	1client	VTILVSRSAAAGLGHF	nonbinder
postGMF-runs\1client\AAA_analysis\LC8hub_peptides\HerpV-U19-2_output	AAA	1client	GLGHFTRSAAASQNDI	nonbinder
postGMF-runs\1client\AAA_analysis\LC8hub_peptides\HerpV-UL9_output	AAA	1client	FGVQMAKSAAAFPGAG	nonbinder
postGMF-runs\1client\AAA_analysis\LC8hub_peptides\Hspa8_output	AAA	1client	NTTIPTKQAAAFTTYS	nonbinder
postGMF-runs\1client\AAA_analysis\LC8hub_peptides\KIBRA-1_output	AAA	1client	PKQYLDVSAAADISGS	nonbinder
postGMF-runs\1client\AAA_analysis\LC8hub_peptides\KIBRA-2_output	AAA	1client	PALKVDKEAAAETPAP	nonbinder
postGMF-runs\1client\AAA_analysis\LC8hub_peptides\LCA5-1_output	AAA	1client	LALRKNAAAAADFADL	nonbinder
postGMF-runs\1client\AAA_analysis\LC8hub_peptides\LCA5-2_output	AAA	1client	FADLCTKGAAAMEDFK	nonbinder
postGMF-runs\1client\AAA_analysis\LC8hub_peptides\MAG_output	AAA	1client	KRPTKDSYAAAEELAE	nonbinder
postGMF-runs\1client\AAA_analysis\LC8hub_peptides\MAP4_output	AAA	1client	ASRSGSKSAAAVAKTT	nonbinder
postGMF-runs\1client\AAA_analysis\LC8hub_peptides\MARK_output	AAA	1client	SSVAYPKRAAASTADS	nonbinder
postGMF-runs\1client\AAA_analysis\LC8hub_peptides\MCTL1_output	AAA	1client	TNGSRTMGAAAVQTIS	nonbinder
postGMF-runs\1client\AAA_analysis\LC8hub_peptides\MLF1_output	AAA	1client	PPKVFQASAAARRAPG	nonbinder
postGMF-runs\1client\AAA_analysis\LC8hub_peptides\MokVP_output	AAA	1client	ERDTKSIQAAAEPTAS	nonbinder
postGMF-runs\1client\AAA_analysis\LC8hub_peptides\MORC3_output	AAA	1client	CDQGNTAAAAAEVPSL	nonbinder
postGMF-runs\1client\AAA_analysis\LC8hub_peptides\MYO5A_output	AAA	1client	IQPKDDKNAAADSTIL	nonbinder
postGMF-runs\1client\AAA_analysis\LC8hub_peptides\NEK9_output	AAA	1client	QVGMHSKGAAAAKEEM	nonbinder
postGMF-runs\1client\AAA_analysis\LC8hub_peptides\Nos1_output	AAA	1client	KAEMKDTGAAADRDLD	nonbinder
postGMF-runs\1client\AAA_analysis\LC8hub_peptides\NRF1_output	AAA	1client	MEEHGVAAAEHMAT	nonbinder
postGMF-runs\1client\AAA_analysis\LC8hub_peptides\PAC11-1_output	AAA	1client	KATMVSVSAAADMEEG	nonbinder
postGMF-runs\1client\AAA_analysis\LC8hub_peptides\PAC11-2_output	AAA	1client	EVITYDKGAAADQIEE	nonbinder
postGMF-runs\1client\AAA_analysis\LC8hub_peptides\PAK1_output	AAA	1client	VTPTRDVAAAAISPTE	nonbinder
postGMF-runs\1client\AAA_analysis\LC8hub_peptides\pilA_output	AAA	1client	DGVWACKSAAAPMFTP	nonbinder
postGMF-runs\1client\AAA_analysis\LC8hub_peptides\RASGRP3_output	AAA	1client	QRATTSQAAAAEPVWS	nonbinder
postGMF-runs\1client\AAA_analysis\LC8hub_peptides\RavP_output	AAA	1client	RRSSEDKSAAATGREL	nonbinder
postGMF-runs\1client\AAA_analysis\LC8hub_peptides\RSP3-1_output	AAA	1client	TVPEADTSAAADAFLD	nonbinder
postGMF-runs\1client\AAA_analysis\LC8hub_peptides\RSP3-2_output	AAA	1client	VDGRRHIDAAADVYLE	nonbinder
postGMF-runs\1client\AAA_analysis\LC8hub_peptides\RSP3-3_output	AAA	1client	QKTGTDAIAAAENGDL	nonbinder
postGMF-runs\1client\AAA_analysis\LC8hub_peptides\Snph_output	AAA	1client	ASCMQERAAAADFVQY	nonbinder
postGMF-runs\1client\AAA_analysis\LC8hub_peptides\swa_output	AAA	1client	RSATSAKAAAADFLVD	nonbinder
postGMF-runs\1client\AAA_analysis\LC8hub_peptides\sw_output	AAA	1client	ETLVYTKQAAATSTGG	nonbinder
postGMF-runs\1client\AAA_analysis\LC8hub_peptides\TRPS1_output	AAA	1client	KTEKVDRSAAAELSTK	nonbinder
postGMF-runs\1client\AAA_analysis\LC8hub_peptides\WWC2-1_output	AAA	1client	SRQTLDAGAAASISGD	nonbinder
postGMF-runs\1client\AAA_analysis\LC8hub_peptides\WWC2-2_output	AAA	1client	IPTLVDKEAAADEAAN	nonbinder
postGMF-runs\1client\AAA_analysis\LC8hub_peptides\WWC3-1_output	AAA	1client	PQQFCDAGAAADIIGE	nonbinder
postGMF-runs\1client\AAA_analysis\LC8hub_peptides\WWC3-2_output	AAA	1client	SPLKVDKEAAADEDLFL	nonbinder
postGMF-runs\1client\AAA_analysis\LC8hub_peptides\ZMYM3_output	AAA	1client	KVEMKSKGAAAEEWKP	nonbinder
postGMF-runs\1client\AAA_analysis\LC8hub_peptides\ZMYND11_output	AAA	1client	SPRMLHRSAAATNDGV	nonbinder
postGMF-runs\1client\AAA_analysis\LC8hub_peptides\Znf354a_output	AAA	1client	CSHRTTKSAAAQDSSF	nonbinder
postGMF-runs\1client\WT_analysis\53BP1\53BP1_1-16_output	WT	1client	SKALIERPSQNNIGIQ	unknown
postGMF-runs\1client\WT_analysis\53BP1\53BP1_105-120_output	WT	1client	REVRTLVTRVITDVYY	nonbinder
postGMF-runs\1client\WT_analysis\53BP1\53BP1_113-128_output	WT	1client	RVITDVYYVDGTEVER	nonbinder
postGMF-runs\1client\WT_analysis\53BP1\53BP1_121-136_output	WT	1client	VDGTEVERKVTEETEE	nonbinder
postGMF-runs\1client\WT_analysis\53BP1\53BP1_129-144_output	WT	1client	KVTEETEEPIVECQEC	nonbinder
postGMF-runs\1client\WT_analysis\53BP1\53BP1_136-151_output	WT	1client	EPIVECQECETEVSPS	nonbinder
postGMF-runs\1client\WT_analysis\53BP1\53BP1_17-32_output	WT	1client	TMECSLRVPETVSAAT	nonbinder
postGMF-runs\1client\WT_analysis\53BP1\53BP1_25-40_output	WT	1client	PETVSAATQTIKNVCE	binder
postGMF-runs\1client\WT_analysis\53BP1\53BP1_33-48_output	WT	1client	QTIKNVCEQGTSTVDQ	nonbinder
postGMF-runs\1client\WT_analysis\53BP1\53BP1_41-56_output	WT	1client	QGTSTVDQNFGKQDAT	nonbinder
postGMF-runs\1client\WT_analysis\53BP1\53BP1_49-64_output	WT	1client	NFGKQDATVQTERGSG	binder
postGMF-runs\1client\WT_analysis\53BP1\53BP1_57-72_output	WT	1client	VQTERGSGEKPVSAPG	nonbinder
postGMF-runs\1client\WT_analysis\53BP1\53BP1_65-80_output	WT	1client	EKPVSAPGDDTESLHS	nonbinder
postGMF-runs\1client\WT_analysis\53BP1\53BP1_73-88_output	WT	1client	DDTESLHSQGEEEFDM	nonbinder
postGMF-runs\1client\WT_analysis\53BP1\53BP1_81-96_output	WT	1client	QGEEEFDMPQPPHGHV	nonbinder
postGMF-runs\1client\WT_analysis\53BP1\53BP1_89-104_output	WT	1client	PQPPHGHVLHRHMRTI	nonbinder
postGMF-runs\1client\WT_analysis\53BP1\53BP1_9-24_output	WT	1client	SQNNIGIQTMECSLRV	binder
postGMF-runs\1client\WT_analysis\53BP1\53BP1_97-112_output	WT	1client	LHRHMRTIREVRTLVT	nonbinder
postGMF-runs\1client\WT_analysis\53BP1\53BP1_QT1_output	WT	1client	RPSQNNIGIQTMECSL	binder
postGMF-runs\1client\WT_analysis\53BP1\53BP1_QT2_output	WT	1client	VPETVSAATQTIKNVC	binder
postGMF-runs\1client\WT_analysis\53BP1\53BP1_QT3_output	WT	1client	NFGKQDATVQTERGSG	binder
postGMF-runs\1client\WT_analysis\gerdos_peptides\AMBRA1_output	WT	1client	PATSVTSQGTQTLALQLQ	binder
postGMF-runs\1client\WT_analysis\gerdos_peptides\AMBRA1_output	WT	1client	PATSVTSQGTQTLALQLQ	Off-target
postGMF-runs\1client\WT_analysis\gerdos_peptides\BCAS1_output	WT	1client	GPKRMLDAQVQTDPVSIG	binder
postGMF-runs\1client\WT_analysis\gerdos_peptides\FAM83D-1_output	WT	1client	QSRKAIDAATQTEPGEEM	binder
postGMF-runs\1client\WT_analysis\gerdos_peptides\FAM83D-2_output	WT	1client	TTIWSRSTTTQTDMDENI	binder
postGMF-runs\1client\WT_analysis\gerdos_peptides\FAM83D-3_output	WT	1client	PGLSVSEVGTQTSITTAC	binder
postGMF-runs\1client\WT_analysis\gerdos_peptides\METT-10_output	WT	1client	NNLNAWDNASQAYFPLPN	binder
postGMF-runs\1client\WT_analysis\gerdos_peptides\METT-10_output	WT	1client	NNLNAWDNASQAYFPLPN	Off-target
postGMF-runs\1client\WT_analysis\gerdos_peptides\MYZAP_output	WT	1client	AKTEVETREIGVGCDLLP	binder
postGMF-runs\1client\WT_analysis\gerdos_peptides\MYZAP_output	WT	1client	AKTEVETREIGVGCDLLP	Off-target
postGMF-runs\1client\WT_analysis\gerdos_peptides\UHRF1BP1L_output	WT	1client	KKQRSVTQATQTSPGVPW	binder
postGMF-runs\1client\WT_analysis\Jespersens_peptides\binders\BSNIII_output	WT	1client	PSPMVAQGTQTPHR	binder
postGMF-runs\1client\WT_analysis\Jespersens_peptides\binders\BSNI_output	WT	1client	SPTTANYGSQTEDL	binder
postGMF-runs\1client\WT_analysis\Jespersens_peptides\binders\HTATSF1_output	WT	1client	YGDGKDGDTQTDAG	binder
postGMF-runs\1client\WT_analysis\Jespersens_peptides\binders\OFD1_output	WT	1client	AKESCNMETQTSST	binder
postGMF-runs\1client\WT_analysis\Jespersens_peptides\binders\RAVL_output	WT	1client	EIHGISRMTQTPQR	binder
postGMF-runs\1client\WT_analysis\Jespersens_peptides\binders\VP35_output	WT	1client	NPKTRNSQTQTDPI	binder
postGMF-runs\1client\WT_analysis\Jespersens_peptides\non-binders\CCL25_output	WT	1client	NKVFAKLHHNTQTFQA	nonbinder
postGMF-runs\1client\WT_analysis\Jespersens_peptides\non-binders\DNLJ2_output	WT	1client	YKIEIPTQCPSCGSK	nonbinder
postGMF-runs\1client\WT_analysis\Jespersens_peptides\non-binders\EIF2S2_output	WT	1client	KPFMLDEEGDTQTEET	nonbinder
postGMF-runs\1client\WT_analysis\Jespersens_peptides\non-binders\EIF3C_output	WT	1client	YELMASLDQPTQTVVM	nonbinder
postGMF-runs\1client\WT_analysis\Jespersens_peptides\non-binders\EIF4G3_output	WT	1client	DFTPAFADFGRQTPGG	nonbinder
postGMF-runs\1client\WT_analysis\Jespersens_peptides\non-binders\FMN2_output	WT	1client	YHHRILEAKSIQTSPT	nonbinder
postGMF-runs\1client\WT_analysis\Jespersens_peptides\non-binders\ILK_output	WT	1client	MDDIFTQCREGN	nonbinder
postGMF-runs\1client\WT_analysis\Jespersens_peptides\non-binders\ITGAX_output	WT	1client	YGQIAPENGTQTPSP	nonbinder
postGMF-runs\1client\WT_analysis\Jespersens_peptides\non-binders\PRSS36_output	WT	1client	YGPDGEETETQTCPP	nonbinder
postGMF-runs\1client\WT_analysis\Jespersens_peptides\non-binders\TMV_output	WT	1client	AQPKQKLDTSIQTEYP	nonbinder
postGMF-runs\1client\WT_analysis\Jespersens_peptides\non-binders\ZZZ3_output	WT	1client	KSVAENGDTDTQTSMF	nonbinder
postGMF-runs\1client\WT_analysis\Jespersens_peptides\weak_binders\ARAP3_output	WT	1client	SPSPTGLPTQTPGF	binder
postGMF-runs\1client\WT_analysis\Jespersens_peptides\weak_binders\GP1BA_output	WT	1client	GQGAALTTATQTTHLE	binder
postGMF-runs\1client\WT_analysis\Jespersens_peptides\weak_binders\NIN_output	WT	1client	ELENRTSETNTPQG	binder
postGMF-runs\1client\WT_analysis\Jespersens_peptides\weak_binders\OTOF_output	WT	1client	PELTSSTEVQVEQA	binder
postGMF-runs\1client\WT_analysis\Jespersens_peptides\weak_binders\ROR1_output	WT	1client	DDSGGNATTQTTSD	binder
postGMF-runs\1client\WT_analysis\Jespersens_peptides\weak_binders\ROR1_output	WT	1client	DDSGGNATTQTTSD	Off-target
postGMF-runs\1client\WT_analysis\Jespersens_peptides\weak_binders\TOGARAM_output	WT	1client	SKTQQTFGSQTECT	binder
postGMF-runs\1client\WT_analysis\LC8hub_peptides\AMOTL1_output	WT	1client	KTGSKDSSTQTDKSAE	binder
postGMF-runs\1client\WT_analysis\LC8hub_peptides\AMOTL2_output	WT	1client	KHGSRDGSTQTEGPPD	binder
postGMF-runs\1client\WT_analysis\LC8hub_peptides\AMOTL2_output	WT	1client	KHGSRDGSTQTEGPPD	Off-target
postGMF-runs\1client\WT_analysis\LC8hub_peptides\AMOT_output	WT	1client	KTGSRDCSTQTERGTE	binder
postGMF-runs\1client\WT_analysis\LC8hub_peptides\Ana2-1_output	WT	1client	DVLTICAGTQTDPFNP	binder
postGMF-runs\1client\WT_analysis\LC8hub_peptides\Ana2-2_output	WT	1client	SKASSTTGTQCDILTT	binder
postGMF-runs\1client\WT_analysis\LC8hub_peptides\BMF_output	WT	1client	PTSQEDKATQTLSPAS	binder
postGMF-runs\1client\WT_analysis\LC8hub_peptides\CDADC1_output	WT	1client	ARAGRSVSTQTGSMTG	binder
postGMF-runs\1client\WT_analysis\LC8hub_peptides\CHICA-1_output	WT	1client	TIWSRSTTTQTDMDEN	binder
postGMF-runs\1client\WT_analysis\LC8hub_peptides\CHICA-2_output	WT	1client	GLSVSEVGTQTSITTA	binder
postGMF-runs\1client\WT_analysis\LC8hub_peptides\CHICA-3_output	WT	1client	SRKAIDAATQTEPGEE	binder
postGMF-runs\1client\WT_analysis\LC8hub_peptides\CITFA_output	WT	1client	MPEVGTQVYWYDF	binder
postGMF-runs\1client\WT_analysis\LC8hub_peptides\DLGAP1-1_output	WT	1client	KNRCLSIGIQVDDAEE	binder
postGMF-runs\1client\WT_analysis\LC8hub_peptides\DLGAP1-2_output	WT	1client	PSKFQSVGVQVEEEKC	binder
postGMF-runs\1client\WT_analysis\LC8hub_peptides\DNMT3A_output	WT	1client	LLVLKDLGIQVDRYIA	binder
postGMF-runs\1client\WT_analysis\LC8hub_peptides\Dync1i1_output	WT	1client	EVVSYSKETQTPLATH	binder
postGMF-runs\1client\WT_analysis\LC8hub_peptides\E183L_output	WT	1client	TVTTQNTASQTMSAIE	binder
postGMF-runs\1client\WT_analysis\LC8hub_peptides\egl_output	WT	1client	VVKLVDAESQTLSTGD	binder
postGMF-runs\1client\WT_analysis\LC8hub_peptides\egl_output	WT	1client	VVKLVDAESQTLSTGD	Off-target
postGMF-runs\1client\WT_analysis\LC8hub_peptides\EML3_output	WT	1client	TPSLVSRGTQTETEVE	binder
postGMF-runs\1client\WT_analysis\LC8hub_peptides\EML3_output	WT	1client	TPSLVSRGTQTETEVE	Off-target
postGMF-runs\1client\WT_analysis\LC8hub_peptides\GCOM1_output	WT	1client	EVETREIGVGCDLLPR	binder
postGMF-runs\1client\WT_analysis\LC8hub_peptides\Gphn_output	WT	1client	HKQTEDKGVQCEEEEE	binder
postGMF-runs\1client\WT_analysis\LC8hub_peptides\HerpV-U19-1_output	WT	1client	VTILVSRSTQTGLGHF	binder
postGMF-runs\1client\WT_analysis\LC8hub_peptides\HerpV-U19-1_output	WT	1client	VTILVSRSTQTGLGHF	Off-target
postGMF-runs\1client\WT_analysis\LC8hub_peptides\HerpV-U19-2_output	WT	1client	GLGHFTRSTQTSQNDI	binder
postGMF-runs\1client\WT_analysis\LC8hub_peptides\HerpV-U19-2_output	WT	1client	GLGHFTRSTQTSQNDI	Off-target
postGMF-runs\1client\WT_analysis\LC8hub_peptides\HerpV-UL9_output	WT	1client	FGVQMAKSTQTFPGAG	binder
postGMF-runs\1client\WT_analysis\LC8hub_peptides\Hspa8_output	WT	1client	NTTIPTKQTQTFTTYS	binder
postGMF-runs\1client\WT_analysis\LC8hub_peptides\Hspa8_output	WT	1client	NTTIPTKQTQTFTTYS	Off-target
postGMF-runs\1client\WT_analysis\LC8hub_peptides\KIBRA-1_output	WT	1client	PKQYLDVSSQTDISGS	binder
postGMF-runs\1client\WT_analysis\LC8hub_peptides\KIBRA-2_output	WT	1client	PALKVDKETNTETPAP	binder
postGMF-runs\1client\WT_analysis\LC8hub_peptides\LCA5-1_output	WT	1client	LALRKNAACQSDFADL	binder
postGMF-runs\1client\WT_analysis\LC8hub_peptides\LCA5-2_output	WT	1client	FADLCTKGVQTMEDFK	binder
postGMF-runs\1client\WT_analysis\LC8hub_peptides\MAG_output	WT	1client	KRPTKDSYTLTEELAE	binder
postGMF-runs\1client\WT_analysis\LC8hub_peptides\MAP4_output	WT	1client	ASRSGSKSTQTVAKTT	binder
postGMF-runs\1client\WT_analysis\LC8hub_peptides\MAP4_output	WT	1client	ASRSGSKSTQTVAKTT	Off-target
postGMF-runs\1client\WT_analysis\LC8hub_peptides\MARK_output	WT	1client	SSVAYPKRSQTSTADS	Off-target
postGMF-runs\1client\WT_analysis\LC8hub_peptides\MARK_output	WT	1client	SSVAYPKRSQTSTADS	binder
postGMF-runs\1client\WT_analysis\LC8hub_peptides\MCTL1_output	WT	1client	TNGSRTMGTQTVQTIS	Off-target
postGMF-runs\1client\WT_analysis\LC8hub_peptides\MCTL1_output	WT	1client	TNGSRTMGTQTVQTIS	binder
postGMF-runs\1client\WT_analysis\LC8hub_peptides\MLF1_output	WT	1client	PPKVFQASTQTRRAPG	binder
postGMF-runs\1client\WT_analysis\LC8hub_peptides\MokVP_output	WT	1client	ERDTKSIQIQTEPTAS	binder
postGMF-runs\1client\WT_analysis\LC8hub_peptides\MORC3_output	WT	1client	CDQGNTAATQTEVPSL	binder
postGMF-runs\1client\WT_analysis\LC8hub_peptides\MYO5A_output	WT	1client	IQPKDDKNTMTDSTIL	binder
postGMF-runs\1client\WT_analysis\LC8hub_peptides\MYO5A_output	WT	1client	IQPKDDKNTMTDSTIL	Off-target
postGMF-runs\1client\WT_analysis\LC8hub_peptides\NEK9_output	WT	1client	QVGMHSKGTQTAKEEM	binder
postGMF-runs\1client\WT_analysis\LC8hub_peptides\NEK9_output	WT	1client	QVGMHSKGTQTAKEEM	Off-target
postGMF-runs\1client\WT_analysis\LC8hub_peptides\Nos1_output	WT	1client	KAEMKDTGIQVDRDLD	binder
postGMF-runs\1client\WT_analysis\LC8hub_peptides\NRF1_output	WT	1client	MEEHGVTQTEHMAT	binder
postGMF-runs\1client\WT_analysis\LC8hub_peptides\PAC11-1_output	WT	1client	KATMVSVSVQTDMEEG	binder
postGMF-runs\1client\WT_analysis\LC8hub_peptides\PAC11-2_output	WT	1client	EVITYDKGIQTDQIEE	binder
postGMF-runs\1client\WT_analysis\LC8hub_peptides\PAK1_output	WT	1client	VTPTRDVATSPISPTE	binder
postGMF-runs\1client\WT_analysis\LC8hub_peptides\pilA_output	WT	1client	DGVWACKSTQDPMFTP	binder
postGMF-runs\1client\WT_analysis\LC8hub_peptides\pilA_output	WT	1client	DGVWACKSTQDPMFTP	Off-target
postGMF-runs\1client\WT_analysis\LC8hub_peptides\RASGRP3_output	WT	1client	QRATTSQATQTEPVWS	binder
postGMF-runs\1client\WT_analysis\LC8hub_peptides\RavP_output	WT	1client	RRSSEDKSTQTTGREL	binder
postGMF-runs\1client\WT_analysis\LC8hub_peptides\RavP_output	WT	1client	RRSSEDKSTQTTGREL	Off-target
postGMF-runs\1client\WT_analysis\LC8hub_peptides\RSP3-1_output	WT	1client	TVPEADTSTQTDAFLD	binder
postGMF-runs\1client\WT_analysis\LC8hub_peptides\RSP3-1_output	WT	1client	TVPEADTSTQTDAFLD	Off-target
postGMF-runs\1client\WT_analysis\LC8hub_peptides\RSP3-2_output	WT	1client	VDGRRHIDIQTDVYLE	binder
postGMF-runs\1client\WT_analysis\LC8hub_peptides\RSP3-2_output	WT	1client	VDGRRHIDIQTDVYLE	Off-target
postGMF-runs\1client\WT_analysis\LC8hub_peptides\RSP3-3_output	WT	1client	QKTGTDAITQIENGDL	binder
postGMF-runs\1client\WT_analysis\LC8hub_peptides\Snph_output	WT	1client	ASCMQERAIQTDFVQY	binder
postGMF-runs\1client\WT_analysis\LC8hub_peptides\swa_output	WT	1client	RSATSAKATQTDFLVD	binder
postGMF-runs\1client\WT_analysis\LC8hub_peptides\swa_output	WT	1client	RSATSAKATQTDFLVD	Off-target
postGMF-runs\1client\WT_analysis\LC8hub_peptides\sw_output	WT	1client	ETLVYTKQTQTTSTGG	binder
postGMF-runs\1client\WT_analysis\LC8hub_peptides\TRPS1_output	WT	1client	KTEKVDRSTQDELSTK	binder
postGMF-runs\1client\WT_analysis\LC8hub_peptides\WWC2-1_output	WT	1client	SRQTLDAGSQTSISGD	binder
postGMF-runs\1client\WT_analysis\LC8hub_peptides\WWC2-2_output	WT	1client	IPTLVDKETNTDEAAN	binder
postGMF-runs\1client\WT_analysis\LC8hub_peptides\WWC3-1_output	WT	1client	PQQFCDAGSQTDIIGE	binder
postGMF-runs\1client\WT_analysis\LC8hub_peptides\WWC3-1_output	WT	1client	PQQFCDAGSQTDIIGE	Off-target
postGMF-runs\1client\WT_analysis\LC8hub_peptides\WWC3-2_output	WT	1client	SPLKVDKETNTDEDLFL	binder
postGMF-runs\1client\WT_analysis\LC8hub_peptides\ZMYM3_output	WT	1client	KVEMKSKGSQTEEWKP	binder
postGMF-runs\1client\WT_analysis\LC8hub_peptides\ZMYM3_output	WT	1client	KVEMKSKGSQTEEWKP	Off-target
postGMF-runs\1client\WT_analysis\LC8hub_peptides\ZMYND11_output	WT	1client	SPRMLHRSTQTTNDGV	binder
postGMF-runs\1client\WT_analysis\LC8hub_peptides\ZMYND11_output	WT	1client	SPRMLHRSTQTTNDGV	Off-target
postGMF-runs\1client\WT_analysis\LC8hub_peptides\Znf354a_output	WT	1client	CSHRTTKSTQTQDSSF	binder
postGMF-runs\1client\WT_analysis\LC8hub_peptides\Znf354a_output	WT	1client	CSHRTTKSTQTQDSSF	Off-target
postGMF-runs\1client\WT_analysis\more_scans\AMBRA1\AMBRA1_1-16_output	WT	1client	MKVVPEKNAVRILWGR	unknown
postGMF-runs\1client\WT_analysis\more_scans\AMBRA1\AMBRA1_1001-1016_output	WT	1client	MPADQRRHVSINSARW	unknown
postGMF-runs\1client\WT_analysis\more_scans\AMBRA1\AMBRA1_1009-1024_output	WT	1client	VSINSARWLPEPGLGL	unknown
postGMF-runs\1client\WT_analysis\more_scans\AMBRA1\AMBRA1_1017-1032_output	WT	1client	LPEPGLGLAYGTNKGD	unknown
postGMF-runs\1client\WT_analysis\more_scans\AMBRA1\AMBRA1_1025-1040_output	WT	1client	AYGTNKGDLVICRPEA	unknown
postGMF-runs\1client\WT_analysis\more_scans\AMBRA1\AMBRA1_1033-1048_output	WT	1client	LVICRPEALNSGVEYY	unknown
postGMF-runs\1client\WT_analysis\more_scans\AMBRA1\AMBRA1_1041-1056_output	WT	1client	LNSGVEYYWDQLNETV	unknown
postGMF-runs\1client\WT_analysis\more_scans\AMBRA1\AMBRA1_1049-1064_output	WT	1client	WDQLNETVFTVHSNSR	unknown
postGMF-runs\1client\WT_analysis\more_scans\AMBRA1\AMBRA1_105-120_output	WT	1client	PTISGLIASGCLDGEV	unknown
postGMF-runs\1client\WT_analysis\more_scans\AMBRA1\AMBRA1_1057-1072_output	WT	1client	FTVHSNSRSSERPGTS	unknown
postGMF-runs\1client\WT_analysis\more_scans\AMBRA1\AMBRA1_1065-1080_output	WT	1client	SSERPGTSRATWRTDR	unknown
postGMF-runs\1client\WT_analysis\more_scans\AMBRA1\AMBRA1_1073-1088_output	WT	1client	RATWRTDRDMGLMNAI	unknown
postGMF-runs\1client\WT_analysis\more_scans\AMBRA1\AMBRA1_1081-1096_output	WT	1client	DMGLMNAIGLQPRNPA	unknown
postGMF-runs\1client\WT_analysis\more_scans\AMBRA1\AMBRA1_1089-1104_output	WT	1client	GLQPRNPATSVTSQGT	unknown
postGMF-runs\1client\WT_analysis\more_scans\AMBRA1\AMBRA1_1097-1112_output	WT	1client	TSVTSQGTQTLALQLQ	unknown
postGMF-runs\1client\WT_analysis\more_scans\AMBRA1\AMBRA1_1105-1120_output	WT	1client	QTLALQLQNAETQTER	unknown
postGMF-runs\1client\WT_analysis\more_scans\AMBRA1\AMBRA1_1113-1128_output	WT	1client	NAETQTEREVPEPGTA	unknown
postGMF-runs\1client\WT_analysis\more_scans\AMBRA1\AMBRA1_1121-1136_output	WT	1client	EVPEPGTAASGPGEGE	unknown
postGMF-runs\1client\WT_analysis\more_scans\AMBRA1\AMBRA1_1129-1144_output	WT	1client	ASGPGEGEGSEYGASG	unknown
postGMF-runs\1client\WT_analysis\more_scans\AMBRA1\AMBRA1_113-128_output	WT	1client	SGCLDGEVRIWDLHGG	unknown
postGMF-runs\1client\WT_analysis\more_scans\AMBRA1\AMBRA1_1137-1152_output	WT	1client	GSEYGASGEDALSRIQ	unknown
postGMF-runs\1client\WT_analysis\more_scans\AMBRA1\AMBRA1_1145-1160_output	WT	1client	EDALSRIQRLMAEGGM	unknown
postGMF-runs\1client\WT_analysis\more_scans\AMBRA1\AMBRA1_1153-1168_output	WT	1client	RLMAEGGMTAVVQREQ	unknown
postGMF-runs\1client\WT_analysis\more_scans\AMBRA1\AMBRA1_1161-1176_output	WT	1client	TAVVQREQSTTMASMG	unknown
postGMF-runs\1client\WT_analysis\more_scans\AMBRA1\AMBRA1_1169-1184_output	WT	1client	STTMASMGGFGNNIIV	unknown
postGMF-runs\1client\WT_analysis\more_scans\AMBRA1\AMBRA1_1177-1192_output	WT	1client	GFGNNIIVSHRIHRSS	unknown
postGMF-runs\1client\WT_analysis\more_scans\AMBRA1\AMBRA1_1185-1200_output	WT	1client	SHRIHRSSQTGTEPGA	unknown
postGMF-runs\1client\WT_analysis\more_scans\AMBRA1\AMBRA1_1193-1208_output	WT	1client	QTGTEPGAAHTSSPQP	unknown
postGMF-runs\1client\WT_analysis\more_scans\AMBRA1\AMBRA1_1201-1216_output	WT	1client	AHTSSPQPSTSRGLLP	unknown
postGMF-runs\1client\WT_analysis\more_scans\AMBRA1\AMBRA1_1209-1224_output	WT	1client	STSRGLLPEAGQLAER	unknown
postGMF-runs\1client\WT_analysis\more_scans\AMBRA1\AMBRA1_121-136_output	WT	1client	RIWDLHGGSESWFTDS	unknown
postGMF-runs\1client\WT_analysis\more_scans\AMBRA1\AMBRA1_1217-1232_output	WT	1client	EAGQLAERGLSPRTAS	unknown
postGMF-runs\1client\WT_analysis\more_scans\AMBRA1\AMBRA1_1225-1240_output	WT	1client	GLSPRTASWDQPGTPG	unknown
postGMF-runs\1client\WT_analysis\more_scans\AMBRA1\AMBRA1_1233-1248_output	WT	1client	WDQPGTPGREPTQPTL	unknown
postGMF-runs\1client\WT_analysis\more_scans\AMBRA1\AMBRA1_1241-1256_output	WT	1client	REPTQPTLPSSSPVPI	unknown
postGMF-runs\1client\WT_analysis\more_scans\AMBRA1\AMBRA1_1249-1264_output	WT	1client	PSSSPVPIPVSLPSAE	unknown
postGMF-runs\1client\WT_analysis\more_scans\AMBRA1\AMBRA1_1257-1272_output	WT	1client	PVSLPSAEGPTLHCEL	unknown
postGMF-runs\1client\WT_analysis\more_scans\AMBRA1\AMBRA1_1265-1280_output	WT	1client	GPTLHCELTNNNHLLD	unknown
postGMF-runs\1client\WT_analysis\more_scans\AMBRA1\AMBRA1_1273-1288_output	WT	1client	TNNNHLLDGGSSRGDA	unknown
postGMF-runs\1client\WT_analysis\more_scans\AMBRA1\AMBRA1_1281-1296_output	WT	1client	GGSSRGDAAGPRGEPR	unknown
postGMF-runs\1client\WT_analysis\more_scans\AMBRA1\AMBRA1_1283-1298_output	WT	1client	SSRGDAAGPRGEPRNR	unknown
postGMF-runs\1client\WT_analysis\more_scans\AMBRA1\AMBRA1_129-144_output	WT	1client	SESWFTDSNNAIASLA	unknown
postGMF-runs\1client\WT_analysis\more_scans\AMBRA1\AMBRA1_137-152_output	WT	1client	NNAIASLAFHPTAQLL	unknown
postGMF-runs\1client\WT_analysis\more_scans\AMBRA1\AMBRA1_145-160_output	WT	1client	FHPTAQLLLIATANEI	unknown
postGMF-runs\1client\WT_analysis\more_scans\AMBRA1\AMBRA1_153-168_output	WT	1client	LIATANEIHFWDWSRR	unknown
postGMF-runs\1client\WT_analysis\more_scans\AMBRA1\AMBRA1_161-176_output	WT	1client	HFWDWSRREPFAVVKT	unknown
postGMF-runs\1client\WT_analysis\more_scans\AMBRA1\AMBRA1_169-184_output	WT	1client	EPFAVVKTASEMERVR	unknown
postGMF-runs\1client\WT_analysis\more_scans\AMBRA1\AMBRA1_17-32_output	WT	1client	ERGARAMGAQRLLQEL	unknown
postGMF-runs\1client\WT_analysis\more_scans\AMBRA1\AMBRA1_177-192_output	WT	1client	ASEMERVRLVRFDPLG	unknown
postGMF-runs\1client\WT_analysis\more_scans\AMBRA1\AMBRA1_185-200_output	WT	1client	LVRFDPLGHYLLTAIV	unknown
postGMF-runs\1client\WT_analysis\more_scans\AMBRA1\AMBRA1_193-208_output	WT	1client	HYLLTAIVNPSNQQGD	unknown
postGMF-runs\1client\WT_analysis\more_scans\AMBRA1\AMBRA1_201-216_output	WT	1client	NPSNQQGDDEPEIPID	unknown
postGMF-runs\1client\WT_analysis\more_scans\AMBRA1\AMBRA1_209-224_output	WT	1client	DEPEIPIDGTELSHYR	unknown
postGMF-runs\1client\WT_analysis\more_scans\AMBRA1\AMBRA1_217-232_output	WT	1client	GTELSHYRQRALLQSQ	unknown
postGMF-runs\1client\WT_analysis\more_scans\AMBRA1\AMBRA1_225-240_output	WT	1client	QRALLQSQPVRRTPLL	unknown
postGMF-runs\1client\WT_analysis\more_scans\AMBRA1\AMBRA1_233-248_output	WT	1client	PVRRTPLLHNFLHMLS	unknown
postGMF-runs\1client\WT_analysis\more_scans\AMBRA1\AMBRA1_241-256_output	WT	1client	HNFLHMLSSRSSGIQV	unknown
postGMF-runs\1client\WT_analysis\more_scans\AMBRA1\AMBRA1_249-264_output	WT	1client	SRSSGIQVGEQSTVQD	unknown
postGMF-runs\1client\WT_analysis\more_scans\AMBRA1\AMBRA1_25-40_output	WT	1client	AQRLLQELVEDKTRWM	unknown
postGMF-runs\1client\WT_analysis\more_scans\AMBRA1\AMBRA1_257-272_output	WT	1client	GEQSTVQDSATPSPPP	unknown
postGMF-runs\1client\WT_analysis\more_scans\AMBRA1\AMBRA1_265-280_output	WT	1client	SATPSPPPPPPQPSTE	unknown
postGMF-runs\1client\WT_analysis\more_scans\AMBRA1\AMBRA1_273-288_output	WT	1client	PPPQPSTERPRTSAYI	unknown
postGMF-runs\1client\WT_analysis\more_scans\AMBRA1\AMBRA1_281-296_output	WT	1client	RPRTSAYIRLRQRVSY	unknown
postGMF-runs\1client\WT_analysis\more_scans\AMBRA1\AMBRA1_289-304_output	WT	1client	RLRQRVSYPTAECCQH	unknown
postGMF-runs\1client\WT_analysis\more_scans\AMBRA1\AMBRA1_297-312_output	WT	1client	PTAECCQHLGILCLCS	unknown
postGMF-runs\1client\WT_analysis\more_scans\AMBRA1\AMBRA1_305-320_output	WT	1client	LGILCLCSRCSGTRVP	unknown
postGMF-runs\1client\WT_analysis\more_scans\AMBRA1\AMBRA1_313-328_output	WT	1client	RCSGTRVPSLLPHQDS	unknown
postGMF-runs\1client\WT_analysis\more_scans\AMBRA1\AMBRA1_321-336_output	WT	1client	SLLPHQDSVPPASARA	unknown
postGMF-runs\1client\WT_analysis\more_scans\AMBRA1\AMBRA1_329-344_output	WT	1client	VPPASARATTPSFSFV	unknown
postGMF-runs\1client\WT_analysis\more_scans\AMBRA1\AMBRA1_33-48_output	WT	1client	VEDKTRWMKWEGKRVE	unknown
postGMF-runs\1client\WT_analysis\more_scans\AMBRA1\AMBRA1_337-352_output	WT	1client	TTPSFSFVQTEPFHPP	unknown
postGMF-runs\1client\WT_analysis\more_scans\AMBRA1\AMBRA1_345-360_output	WT	1client	QTEPFHPPEQASSTQQ	unknown
postGMF-runs\1client\WT_analysis\more_scans\AMBRA1\AMBRA1_353-368_output	WT	1client	EQASSTQQDQGLLNRP	unknown
postGMF-runs\1client\WT_analysis\more_scans\AMBRA1\AMBRA1_361-376_output	WT	1client	DQGLLNRPSAFSTVQS	unknown
postGMF-runs\1client\WT_analysis\more_scans\AMBRA1\AMBRA1_369-384_output	WT	1client	SAFSTVQSSTAGNTLR	unknown
postGMF-runs\1client\WT_analysis\more_scans\AMBRA1\AMBRA1_377-392_output	WT	1client	STAGNTLRNLSLGPTR	unknown
postGMF-runs\1client\WT_analysis\more_scans\AMBRA1\AMBRA1_385-400_output	WT	1client	NLSLGPTRRSLGGPLS	unknown
postGMF-runs\1client\WT_analysis\more_scans\AMBRA1\AMBRA1_393-408_output	WT	1client	RSLGGPLSSHPSRYHR	unknown
postGMF-runs\1client\WT_analysis\more_scans\AMBRA1\AMBRA1_401-416_output	WT	1client	SHPSRYHREIAPGLTG	unknown
postGMF-runs\1client\WT_analysis\more_scans\AMBRA1\AMBRA1_409-424_output	WT	1client	EIAPGLTGSEWTRTVL	unknown
postGMF-runs\1client\WT_analysis\more_scans\AMBRA1\AMBRA1_41-56_output	WT	1client	KWEGKRVELPDSPRST	unknown
postGMF-runs\1client\WT_analysis\more_scans\AMBRA1\AMBRA1_417-432_output	WT	1client	SEWTRTVLSLNSRSEA	unknown
postGMF-runs\1client\WT_analysis\more_scans\AMBRA1\AMBRA1_425-440_output	WT	1client	SLNSRSEAESMPPPRT	unknown
postGMF-runs\1client\WT_analysis\more_scans\AMBRA1\AMBRA1_433-448_output	WT	1client	ESMPPPRTSASSVSLL	unknown
postGMF-runs\1client\WT_analysis\more_scans\AMBRA1\AMBRA1_441-456_output	WT	1client	SASSVSLLSVLRQQEG	unknown
postGMF-runs\1client\WT_analysis\more_scans\AMBRA1\AMBRA1_449-464_output	WT	1client	SVLRQQEGGSQASVYT	unknown
postGMF-runs\1client\WT_analysis\more_scans\AMBRA1\AMBRA1_457-472_output	WT	1client	GSQASVYTSATEGRGF	unknown
postGMF-runs\1client\WT_analysis\more_scans\AMBRA1\AMBRA1_465-480_output	WT	1client	SATEGRGFPASGLATE	unknown
postGMF-runs\1client\WT_analysis\more_scans\AMBRA1\AMBRA1_473-488_output	WT	1client	PASGLATESDGGNGSS	unknown
postGMF-runs\1client\WT_analysis\more_scans\AMBRA1\AMBRA1_481-496_output	WT	1client	SDGGNGSSQNNSGSIR	unknown
postGMF-runs\1client\WT_analysis\more_scans\AMBRA1\AMBRA1_489-504_output	WT	1client	QNNSGSIRHELQCDLR	unknown
postGMF-runs\1client\WT_analysis\more_scans\AMBRA1\AMBRA1_49-64_output	WT	1client	LPDSPRSTFLLAFSPD	unknown
postGMF-runs\1client\WT_analysis\more_scans\AMBRA1\AMBRA1_497-512_output	WT	1client	HELQCDLRRFFLEYDR	unknown
postGMF-runs\1client\WT_analysis\more_scans\AMBRA1\AMBRA1_505-520_output	WT	1client	RFFLEYDRLQELDQSL	unknown
postGMF-runs\1client\WT_analysis\more_scans\AMBRA1\AMBRA1_513-528_output	WT	1client	LQELDQSLSGEAPQTQ	unknown
postGMF-runs\1client\WT_analysis\more_scans\AMBRA1\AMBRA1_521-536_output	WT	1client	SGEAPQTQQAQEMLNN	unknown
postGMF-runs\1client\WT_analysis\more_scans\AMBRA1\AMBRA1_529-544_output	WT	1client	QAQEMLNNNIESERPG	unknown
postGMF-runs\1client\WT_analysis\more_scans\AMBRA1\AMBRA1_537-552_output	WT	1client	NIESERPGPSHQPTPH	unknown
postGMF-runs\1client\WT_analysis\more_scans\AMBRA1\AMBRA1_545-560_output	WT	1client	PSHQPTPHSSENNSNL	unknown
postGMF-runs\1client\WT_analysis\more_scans\AMBRA1\AMBRA1_553-568_output	WT	1client	SSENNSNLSRGHLNRC	unknown
postGMF-runs\1client\WT_analysis\more_scans\AMBRA1\AMBRA1_561-576_output	WT	1client	SRGHLNRCRACHNLLT	unknown
postGMF-runs\1client\WT_analysis\more_scans\AMBRA1\AMBRA1_569-584_output	WT	1client	RACHNLLTFNNDTLRW	unknown
postGMF-runs\1client\WT_analysis\more_scans\AMBRA1\AMBRA1_57-72_output	WT	1client	FLLAFSPDRTLLASTH	unknown
postGMF-runs\1client\WT_analysis\more_scans\AMBRA1\AMBRA1_577-592_output	WT	1client	FNNDTLRWERTTPNYS	unknown
postGMF-runs\1client\WT_analysis\more_scans\AMBRA1\AMBRA1_585-600_output	WT	1client	ERTTPNYSSGEASSSW	unknown
postGMF-runs\1client\WT_analysis\more_scans\AMBRA1\AMBRA1_593-608_output	WT	1client	SGEASSSWQVPSSFES	unknown
postGMF-runs\1client\WT_analysis\more_scans\AMBRA1\AMBRA1_601-616_output	WT	1client	QVPSSFESVPSSGSQL	unknown
postGMF-runs\1client\WT_analysis\more_scans\AMBRA1\AMBRA1_609-624_output	WT	1client	VPSSGSQLPPLERTEG	unknown
postGMF-runs\1client\WT_analysis\more_scans\AMBRA1\AMBRA1_617-632_output	WT	1client	PPLERTEGQTPSSSRL	unknown
postGMF-runs\1client\WT_analysis\more_scans\AMBRA1\AMBRA1_625-640_output	WT	1client	QTPSSSRLELSSSASP	unknown
postGMF-runs\1client\WT_analysis\more_scans\AMBRA1\AMBRA1_633-648_output	WT	1client	ELSSSASPQEERTVGV	unknown
postGMF-runs\1client\WT_analysis\more_scans\AMBRA1\AMBRA1_641-656_output	WT	1client	QEERTVGVAFNQETGH	unknown
postGMF-runs\1client\WT_analysis\more_scans\AMBRA1\AMBRA1_649-664_output	WT	1client	AFNQETGHWERIYTQS	unknown
postGMF-runs\1client\WT_analysis\more_scans\AMBRA1\AMBRA1_65-80_output	WT	1client	RTLLASTHVNHNIYIT	unknown
postGMF-runs\1client\WT_analysis\more_scans\AMBRA1\AMBRA1_657-672_output	WT	1client	WERIYTQSSRSGTVSQ	unknown
postGMF-runs\1client\WT_analysis\more_scans\AMBRA1\AMBRA1_665-680_output	WT	1client	SRSGTVSQEALHQDMP	unknown
postGMF-runs\1client\WT_analysis\more_scans\AMBRA1\AMBRA1_673-688_output	WT	1client	EALHQDMPEESSEEDS	unknown
postGMF-runs\1client\WT_analysis\more_scans\AMBRA1\AMBRA1_681-696_output	WT	1client	EESSEEDSLRRRLLES	unknown
postGMF-runs\1client\WT_analysis\more_scans\AMBRA1\AMBRA1_689-704_output	WT	1client	LRRRLLESSLISLSRY	unknown
postGMF-runs\1client\WT_analysis\more_scans\AMBRA1\AMBRA1_697-712_output	WT	1client	SLISLSRYDGAGSREH	unknown
postGMF-runs\1client\WT_analysis\more_scans\AMBRA1\AMBRA1_705-720_output	WT	1client	DGAGSREHPIYPDPAR	unknown
postGMF-runs\1client\WT_analysis\more_scans\AMBRA1\AMBRA1_713-728_output	WT	1client	PIYPDPARLSPAAYYA	unknown
postGMF-runs\1client\WT_analysis\more_scans\AMBRA1\AMBRA1_721-736_output	WT	1client	LSPAAYYAQRMIQYLS	unknown
postGMF-runs\1client\WT_analysis\more_scans\AMBRA1\AMBRA1_729-744_output	WT	1client	QRMIQYLSRRDSIRQR	unknown
postGMF-runs\1client\WT_analysis\more_scans\AMBRA1\AMBRA1_73-88_output	WT	1client	VNHNIYITEVKTGKCV	unknown
postGMF-runs\1client\WT_analysis\more_scans\AMBRA1\AMBRA1_737-752_output	WT	1client	RRDSIRQRSMRYQQNR	unknown
postGMF-runs\1client\WT_analysis\more_scans\AMBRA1\AMBRA1_745-760_output	WT	1client	SMRYQQNRLRSSTSSS	unknown
postGMF-runs\1client\WT_analysis\more_scans\AMBRA1\AMBRA1_753-768_output	WT	1client	LRSSTSSSSSDNQGPS	unknown
postGMF-runs\1client\WT_analysis\more_scans\AMBRA1\AMBRA1_761-776_output	WT	1client	SSDNQGPSVEGTDLEF	unknown
postGMF-runs\1client\WT_analysis\more_scans\AMBRA1\AMBRA1_769-784_output	WT	1client	VEGTDLEFEDFEDNGD	unknown
postGMF-runs\1client\WT_analysis\more_scans\AMBRA1\AMBRA1_777-792_output	WT	1client	EDFEDNGDRSRHRAPR	unknown
postGMF-runs\1client\WT_analysis\more_scans\AMBRA1\AMBRA1_785-800_output	WT	1client	RSRHRAPRNARMSAPS	unknown
postGMF-runs\1client\WT_analysis\more_scans\AMBRA1\AMBRA1_793-808_output	WT	1client	NARMSAPSLGRFVPRR	unknown
postGMF-runs\1client\WT_analysis\more_scans\AMBRA1\AMBRA1_801-816_output	WT	1client	LGRFVPRRFLLPEYLP	unknown
postGMF-runs\1client\WT_analysis\more_scans\AMBRA1\AMBRA1_809-824_output	WT	1client	FLLPEYLPYAGIFHER	unknown
postGMF-runs\1client\WT_analysis\more_scans\AMBRA1\AMBRA1_81-96_output	WT	1client	EVKTGKCVHSLIGHRR	unknown
postGMF-runs\1client\WT_analysis\more_scans\AMBRA1\AMBRA1_817-832_output	WT	1client	YAGIFHERGQPGLATH	unknown
postGMF-runs\1client\WT_analysis\more_scans\AMBRA1\AMBRA1_825-840_output	WT	1client	GQPGLATHSSVNRVLA	unknown
postGMF-runs\1client\WT_analysis\more_scans\AMBRA1\AMBRA1_833-848_output	WT	1client	SSVNRVLAGAVIGDGQ	unknown
postGMF-runs\1client\WT_analysis\more_scans\AMBRA1\AMBRA1_841-856_output	WT	1client	GAVIGDGQSAVASNIA	unknown
postGMF-runs\1client\WT_analysis\more_scans\AMBRA1\AMBRA1_849-864_output	WT	1client	SAVASNIANTTYRLQW	unknown
postGMF-runs\1client\WT_analysis\more_scans\AMBRA1\AMBRA1_857-872_output	WT	1client	NTTYRLQWWDFTKFDL	unknown
postGMF-runs\1client\WT_analysis\more_scans\AMBRA1\AMBRA1_865-880_output	WT	1client	WDFTKFDLPEISNASV	unknown
postGMF-runs\1client\WT_analysis\more_scans\AMBRA1\AMBRA1_873-888_output	WT	1client	PEISNASVNVLVQNCK	unknown
postGMF-runs\1client\WT_analysis\more_scans\AMBRA1\AMBRA1_881-896_output	WT	1client	NVLVQNCKIYNDASCD	unknown
postGMF-runs\1client\WT_analysis\more_scans\AMBRA1\AMBRA1_889-904_output	WT	1client	IYNDASCDISADGQLL	unknown
postGMF-runs\1client\WT_analysis\more_scans\AMBRA1\AMBRA1_89-104_output	WT	1client	HSLIGHRRTPWCVTFH	unknown
postGMF-runs\1client\WT_analysis\more_scans\AMBRA1\AMBRA1_897-912_output	WT	1client	ISADGQLLAAFIPSSQ	unknown
postGMF-runs\1client\WT_analysis\more_scans\AMBRA1\AMBRA1_9-24_output	WT	1client	AVRILWGRERGARAMG	unknown
postGMF-runs\1client\WT_analysis\more_scans\AMBRA1\AMBRA1_905-920_output	WT	1client	AAFIPSSQRGFPDEGI	unknown
postGMF-runs\1client\WT_analysis\more_scans\AMBRA1\AMBRA1_913-928_output	WT	1client	RGFPDEGILAVYSLAP	unknown
postGMF-runs\1client\WT_analysis\more_scans\AMBRA1\AMBRA1_921-936_output	WT	1client	LAVYSLAPHNLGEMLY	unknown
postGMF-runs\1client\WT_analysis\more_scans\AMBRA1\AMBRA1_929-944_output	WT	1client	HNLGEMLYTKRFGPNA	unknown
postGMF-runs\1client\WT_analysis\more_scans\AMBRA1\AMBRA1_937-952_output	WT	1client	TKRFGPNAISVSLSPM	unknown
postGMF-runs\1client\WT_analysis\more_scans\AMBRA1\AMBRA1_945-960_output	WT	1client	ISVSLSPMGRYVMVGL	unknown
postGMF-runs\1client\WT_analysis\more_scans\AMBRA1\AMBRA1_953-968_output	WT	1client	GRYVMVGLASRRILLH	unknown
postGMF-runs\1client\WT_analysis\more_scans\AMBRA1\AMBRA1_961-976_output	WT	1client	ASRRILLHPSTEHMVA	unknown
postGMF-runs\1client\WT_analysis\more_scans\AMBRA1\AMBRA1_969-984_output	WT	1client	PSTEHMVAQVFRLQQA	unknown
postGMF-runs\1client\WT_analysis\more_scans\AMBRA1\AMBRA1_97-112_output	WT	1client	TPWCVTFHPTISGLIA	unknown
postGMF-runs\1client\WT_analysis\more_scans\AMBRA1\AMBRA1_977-992_output	WT	1client	QVFRLQQAHGGETSMR	unknown
postGMF-runs\1client\WT_analysis\more_scans\AMBRA1\AMBRA1_985-1000_output	WT	1client	HGGETSMRRVFNVLYP	unknown
postGMF-runs\1client\WT_analysis\more_scans\AMBRA1\AMBRA1_993-1008_output	WT	1client	RVFNVLYPMPADQRRH	unknown
postGMF-runs\1client\WT_analysis\more_scans\CITFA\CITFA_1-16_output	WT	1client	MPEVGTQVYWYDFEDA	unknown
postGMF-runs\1client\WT_analysis\more_scans\CITFA\CITFA_105-120_output	WT	1client	EAVNGVVEEFNAMSQL	unknown
postGMF-runs\1client\WT_analysis\more_scans\CITFA\CITFA_113-128_output	WT	1client	EFNAMSQLYSATDGAN	unknown
postGMF-runs\1client\WT_analysis\more_scans\CITFA\CITFA_121-136_output	WT	1client	YSATDGANDGLGTALS	unknown
postGMF-runs\1client\WT_analysis\more_scans\CITFA\CITFA_129-144_output	WT	1client	DGLGTALSGKSAQAMD	unknown
postGMF-runs\1client\WT_analysis\more_scans\CITFA\CITFA_137-152_output	WT	1client	GKSAQAMDVKVAPFLE	unknown
postGMF-runs\1client\WT_analysis\more_scans\CITFA\CITFA_145-160_output	WT	1client	VKVAPFLEVVRKLCEP	unknown
postGMF-runs\1client\WT_analysis\more_scans\CITFA\CITFA_153-168_output	WT	1client	VVRKLCEPRNLDVVEW	unknown
postGMF-runs\1client\WT_analysis\more_scans\CITFA\CITFA_161-176_output	WT	1client	RNLDVVEWNRDELRRR	unknown
postGMF-runs\1client\WT_analysis\more_scans\CITFA\CITFA_169-184_output	WT	1client	NRDELRRRGRIAFTDL	unknown
postGMF-runs\1client\WT_analysis\more_scans\CITFA\CITFA_17-32_output	WT	1client	PPPWKNEEELAKMLEL	unknown
postGMF-runs\1client\WT_analysis\more_scans\CITFA\CITFA_177-192_output	WT	1client	GRIAFTDLLYHKRVVM	unknown
postGMF-runs\1client\WT_analysis\more_scans\CITFA\CITFA_185-200_output	WT	1client	LYHKRVVMIVDTSKPH	unknown
postGMF-runs\1client\WT_analysis\more_scans\CITFA\CITFA_193-208_output	WT	1client	IVDTSKPHFLICLPVT	unknown
postGMF-runs\1client\WT_analysis\more_scans\CITFA\CITFA_201-216_output	WT	1client	FLICLPVTHKKRLTDK	unknown
postGMF-runs\1client\WT_analysis\more_scans\CITFA\CITFA_209-224_output	WT	1client	HKKRLTDKREVYCMQL	unknown
postGMF-runs\1client\WT_analysis\more_scans\CITFA\CITFA_217-232_output	WT	1client	REVYCMQLLAPTASPV	unknown
postGMF-runs\1client\WT_analysis\more_scans\CITFA\CITFA_225-240_output	WT	1client	LAPTASPVPWRRLTKY	unknown
postGMF-runs\1client\WT_analysis\more_scans\CITFA\CITFA_233-248_output	WT	1client	PWRRLTKYALVSPRAR	unknown
postGMF-runs\1client\WT_analysis\more_scans\CITFA\CITFA_241-256_output	WT	1client	ALVSPRAREFVIITIT	unknown
postGMF-runs\1client\WT_analysis\more_scans\CITFA\CITFA_249-264_output	WT	1client	EFVIITITKRDSVKNS	unknown
postGMF-runs\1client\WT_analysis\more_scans\CITFA\CITFA_25-40_output	WT	1client	ELAKMLELSSSIEGPI	unknown
postGMF-runs\1client\WT_analysis\more_scans\CITFA\CITFA_257-272_output	WT	1client	KRDSVKNSNLSSDVIG	unknown
postGMF-runs\1client\WT_analysis\more_scans\CITFA\CITFA_265-280_output	WT	1client	NLSSDVIGAAPEAKSA	unknown
postGMF-runs\1client\WT_analysis\more_scans\CITFA\CITFA_273-288_output	WT	1client	AAPEAKSASQKDLEDG	unknown
postGMF-runs\1client\WT_analysis\more_scans\CITFA\CITFA_281-296_output	WT	1client	SQKDLEDGEDGDYDDE	unknown
postGMF-runs\1client\WT_analysis\more_scans\CITFA\CITFA_289-304_output	WT	1client	EDGDYDDEEAEDEYDN	unknown
postGMF-runs\1client\WT_analysis\more_scans\CITFA\CITFA_297-312_output	WT	1client	EAEDEYDNDDDDEEDD	unknown
postGMF-runs\1client\WT_analysis\more_scans\CITFA\CITFA_305-320_output	WT	1client	DDDDEEDDGDEDENSN	unknown
postGMF-runs\1client\WT_analysis\more_scans\CITFA\CITFA_313-328_output	WT	1client	GDEDENSNDGDNRPRK	unknown
postGMF-runs\1client\WT_analysis\more_scans\CITFA\CITFA_321-336_output	WT	1client	DGDNRPRKRARVADSV	unknown
postGMF-runs\1client\WT_analysis\more_scans\CITFA\CITFA_329-344_output	WT	1client	RARVADSVDNSETDSL	unknown
postGMF-runs\1client\WT_analysis\more_scans\CITFA\CITFA_33-48_output	WT	1client	SSSIEGPISDARHMLV	unknown
postGMF-runs\1client\WT_analysis\more_scans\CITFA\CITFA_337-352_output	WT	1client	DNSETDSLNNNEDYPF	unknown
postGMF-runs\1client\WT_analysis\more_scans\CITFA\CITFA_345-360_output	WT	1client	NNNEDYPFLNEIDAYE	unknown
postGMF-runs\1client\WT_analysis\more_scans\CITFA\CITFA_353-368_output	WT	1client	LNEIDAYERMRTGSAP	unknown
postGMF-runs\1client\WT_analysis\more_scans\CITFA\CITFA_361-376_output	WT	1client	RMRTGSAPIFSAEDRV	unknown
postGMF-runs\1client\WT_analysis\more_scans\CITFA\CITFA_369-384_output	WT	1client	IFSAEDRVPDDPLFNT	unknown
postGMF-runs\1client\WT_analysis\more_scans\CITFA\CITFA_377-392_output	WT	1client	PDDPLFNTPVATYRRA	unknown
postGMF-runs\1client\WT_analysis\more_scans\CITFA\CITFA_385-400_output	WT	1client	PVATYRRASRATREGR	unknown
postGMF-runs\1client\WT_analysis\more_scans\CITFA\CITFA_393-408_output	WT	1client	SRATREGRDWVYRFTH	unknown
postGMF-runs\1client\WT_analysis\more_scans\CITFA\CITFA_401-416_output	WT	1client	DWVYRFTHQNDRNKLF	unknown
postGMF-runs\1client\WT_analysis\more_scans\CITFA\CITFA_405-420_output	WT	1client	RFTHQNDRNKLFALTN	unknown
postGMF-runs\1client\WT_analysis\more_scans\CITFA\CITFA_41-56_output	WT	1client	SDARHMLVQPREVYIS	unknown
postGMF-runs\1client\WT_analysis\more_scans\CITFA\CITFA_49-64_output	WT	1client	QPREVYISMRTKLRNR	unknown
postGMF-runs\1client\WT_analysis\more_scans\CITFA\CITFA_57-72_output	WT	1client	MRTKLRNRQQPCNRYW	unknown
postGMF-runs\1client\WT_analysis\more_scans\CITFA\CITFA_65-80_output	WT	1client	QQPCNRYWSIVLEPHF	unknown
postGMF-runs\1client\WT_analysis\more_scans\CITFA\CITFA_73-88_output	WT	1client	SIVLEPHFGPLLGMNM	unknown
postGMF-runs\1client\WT_analysis\more_scans\CITFA\CITFA_81-96_output	WT	1client	GPLLGMNMVMRELKVE	unknown
postGMF-runs\1client\WT_analysis\more_scans\CITFA\CITFA_89-104_output	WT	1client	VMRELKVEMVTRGEAE	unknown
postGMF-runs\1client\WT_analysis\more_scans\CITFA\CITFA_9-24_output	WT	1client	YWYDFEDAPPPWKNEE	unknown
postGMF-runs\1client\WT_analysis\more_scans\CITFA\CITFA_97-112_output	WT	1client	MVTRGEAEEAVNGVVE	unknown
postGMF-runs\1client\WT_analysis\more_scans\CIZ1\CIZ1_1-16_output	WT	1client	MFSQQQQQQLQQQQQQ	unknown
postGMF-runs\1client\WT_analysis\more_scans\CIZ1\CIZ1_105-120_output	WT	1client	ATYDTAGLTMPTATLG	unknown
postGMF-runs\1client\WT_analysis\more_scans\CIZ1\CIZ1_113-128_output	WT	1client	TMPTATLGNLRGYGMA	unknown
postGMF-runs\1client\WT_analysis\more_scans\CIZ1\CIZ1_121-136_output	WT	1client	NLRGYGMASPGLAAPS	unknown
postGMF-runs\1client\WT_analysis\more_scans\CIZ1\CIZ1_129-144_output	WT	1client	SPGLAAPSLTPPQLAT	unknown
postGMF-runs\1client\WT_analysis\more_scans\CIZ1\CIZ1_137-152_output	WT	1client	LTPPQLATPNLQQFFP	unknown
postGMF-runs\1client\WT_analysis\more_scans\CIZ1\CIZ1_145-160_output	WT	1client	PNLQQFFPQATRQSLL	unknown
postGMF-runs\1client\WT_analysis\more_scans\CIZ1\CIZ1_153-168_output	WT	1client	QATRQSLLGPPPVGVP	unknown
postGMF-runs\1client\WT_analysis\more_scans\CIZ1\CIZ1_161-176_output	WT	1client	GPPPVGVPMNPSQFNL	unknown
postGMF-runs\1client\WT_analysis\more_scans\CIZ1\CIZ1_169-184_output	WT	1client	MNPSQFNLSGRNPQKQ	unknown
postGMF-runs\1client\WT_analysis\more_scans\CIZ1\CIZ1_17-32_output	WT	1client	LQQLQQQQLQQQQLQQ	unknown
postGMF-runs\1client\WT_analysis\more_scans\CIZ1\CIZ1_177-192_output	WT	1client	SGRNPQKQARTSSSTT	unknown
postGMF-runs\1client\WT_analysis\more_scans\CIZ1\CIZ1_185-200_output	WT	1client	ARTSSSTTPNRKDSSS	unknown
postGMF-runs\1client\WT_analysis\more_scans\CIZ1\CIZ1_193-208_output	WT	1client	PNRKDSSSQTMPVEDK	unknown
postGMF-runs\1client\WT_analysis\more_scans\CIZ1\CIZ1_201-216_output	WT	1client	QTMPVEDKSDPPEGSE	unknown
postGMF-runs\1client\WT_analysis\more_scans\CIZ1\CIZ1_209-224_output	WT	1client	SDPPEGSEEAAEPRMD	unknown
postGMF-runs\1client\WT_analysis\more_scans\CIZ1\CIZ1_217-232_output	WT	1client	EAAEPRMDTPEDQDLP	unknown
postGMF-runs\1client\WT_analysis\more_scans\CIZ1\CIZ1_225-240_output	WT	1client	TPEDQDLPPCPEDIAK	unknown
postGMF-runs\1client\WT_analysis\more_scans\CIZ1\CIZ1_233-248_output	WT	1client	PCPEDIAKEKRTPAPE	unknown
postGMF-runs\1client\WT_analysis\more_scans\CIZ1\CIZ1_241-256_output	WT	1client	EKRTPAPEPEPCEASE	unknown
postGMF-runs\1client\WT_analysis\more_scans\CIZ1\CIZ1_249-264_output	WT	1client	PEPCEASELPAKRLRS	unknown
postGMF-runs\1client\WT_analysis\more_scans\CIZ1\CIZ1_25-40_output	WT	1client	LQQQQLQQQQLLQLQQ	unknown
postGMF-runs\1client\WT_analysis\more_scans\CIZ1\CIZ1_257-272_output	WT	1client	LPAKRLRSSEEPTEKE	unknown
postGMF-runs\1client\WT_analysis\more_scans\CIZ1\CIZ1_265-280_output	WT	1client	SEEPTEKEPPGQLQVK	unknown
postGMF-runs\1client\WT_analysis\more_scans\CIZ1\CIZ1_273-288_output	WT	1client	PPGQLQVKAQPQARMT	unknown
postGMF-runs\1client\WT_analysis\more_scans\CIZ1\CIZ1_281-296_output	WT	1client	AQPQARMTVPKQTQTP	unknown
postGMF-runs\1client\WT_analysis\more_scans\CIZ1\CIZ1_289-304_output	WT	1client	VPKQTQTPDLLPEALE	unknown
postGMF-runs\1client\WT_analysis\more_scans\CIZ1\CIZ1_297-312_output	WT	1client	DLLPEALEAQVLPRFQ	unknown
postGMF-runs\1client\WT_analysis\more_scans\CIZ1\CIZ1_305-320_output	WT	1client	AQVLPRFQPRVLQVQA	unknown
postGMF-runs\1client\WT_analysis\more_scans\CIZ1\CIZ1_313-328_output	WT	1client	PRVLQVQAQVQSQTQP	unknown
postGMF-runs\1client\WT_analysis\more_scans\CIZ1\CIZ1_321-336_output	WT	1client	QVQSQTQPRIPSTDTQ	unknown
postGMF-runs\1client\WT_analysis\more_scans\CIZ1\CIZ1_329-344_output	WT	1client	RIPSTDTQVQPKLQKQ	unknown
postGMF-runs\1client\WT_analysis\more_scans\CIZ1\CIZ1_33-48_output	WT	1client	QQLLQLQQLLQQSPPQ	unknown
postGMF-runs\1client\WT_analysis\more_scans\CIZ1\CIZ1_337-352_output	WT	1client	VQPKLQKQAQTQTSPE	unknown
postGMF-runs\1client\WT_analysis\more_scans\CIZ1\CIZ1_345-360_output	WT	1client	AQTQTSPEHLVLQQKQ	unknown
postGMF-runs\1client\WT_analysis\more_scans\CIZ1\CIZ1_353-368_output	WT	1client	HLVLQQKQVQPQLQQE	unknown
postGMF-runs\1client\WT_analysis\more_scans\CIZ1\CIZ1_361-376_output	WT	1client	VQPQLQQEAEPQKQVQ	unknown
postGMF-runs\1client\WT_analysis\more_scans\CIZ1\CIZ1_369-384_output	WT	1client	AEPQKQVQPQVQPQAH	unknown
postGMF-runs\1client\WT_analysis\more_scans\CIZ1\CIZ1_377-392_output	WT	1client	PQVQPQAHSQGPRQVQ	unknown
postGMF-runs\1client\WT_analysis\more_scans\CIZ1\CIZ1_385-400_output	WT	1client	SQGPRQVQLQQEAEPL	unknown
postGMF-runs\1client\WT_analysis\more_scans\CIZ1\CIZ1_393-408_output	WT	1client	LQQEAEPLKQVQPQVQ	unknown
postGMF-runs\1client\WT_analysis\more_scans\CIZ1\CIZ1_401-416_output	WT	1client	KQVQPQVQPQAHSQPP	unknown
postGMF-runs\1client\WT_analysis\more_scans\CIZ1\CIZ1_409-424_output	WT	1client	PQAHSQPPRQVQLQLQ	unknown
postGMF-runs\1client\WT_analysis\more_scans\CIZ1\CIZ1_41-56_output	WT	1client	LLQQSPPQAPLPMAVS	unknown
postGMF-runs\1client\WT_analysis\more_scans\CIZ1\CIZ1_417-432_output	WT	1client	RQVQLQLQKQVQTQTY	unknown
postGMF-runs\1client\WT_analysis\more_scans\CIZ1\CIZ1_425-440_output	WT	1client	KQVQTQTYPQVHTQAQ	unknown
postGMF-runs\1client\WT_analysis\more_scans\CIZ1\CIZ1_433-448_output	WT	1client	PQVHTQAQPSVQPQEH	unknown
postGMF-runs\1client\WT_analysis\more_scans\CIZ1\CIZ1_441-456_output	WT	1client	PSVQPQEHPPAQVSVQ	unknown
postGMF-runs\1client\WT_analysis\more_scans\CIZ1\CIZ1_449-464_output	WT	1client	PPAQVSVQPPEQTHEQ	unknown
postGMF-runs\1client\WT_analysis\more_scans\CIZ1\CIZ1_457-472_output	WT	1client	PPEQTHEQPHTQPQVS	unknown
postGMF-runs\1client\WT_analysis\more_scans\CIZ1\CIZ1_465-480_output	WT	1client	PHTQPQVSLLAPEQTP	unknown
postGMF-runs\1client\WT_analysis\more_scans\CIZ1\CIZ1_473-488_output	WT	1client	LLAPEQTPVVVHVCGL	unknown
postGMF-runs\1client\WT_analysis\more_scans\CIZ1\CIZ1_481-496_output	WT	1client	VVVHVCGLEMPPDAVE	unknown
postGMF-runs\1client\WT_analysis\more_scans\CIZ1\CIZ1_489-504_output	WT	1client	EMPPDAVEAGGGMEKT	unknown
postGMF-runs\1client\WT_analysis\more_scans\CIZ1\CIZ1_49-64_output	WT	1client	APLPMAVSRGLPPQQP	unknown
postGMF-runs\1client\WT_analysis\more_scans\CIZ1\CIZ1_497-512_output	WT	1client	AGGGMEKTLPEPVGTQ	unknown
postGMF-runs\1client\WT_analysis\more_scans\CIZ1\CIZ1_505-520_output	WT	1client	LPEPVGTQVSMEEIQN	unknown
postGMF-runs\1client\WT_analysis\more_scans\CIZ1\CIZ1_513-528_output	WT	1client	VSMEEIQNESACGLDV	unknown
postGMF-runs\1client\WT_analysis\more_scans\CIZ1\CIZ1_521-536_output	WT	1client	ESACGLDVGECENRAR	unknown
postGMF-runs\1client\WT_analysis\more_scans\CIZ1\CIZ1_529-544_output	WT	1client	GECENRAREMPGVWGA	unknown
postGMF-runs\1client\WT_analysis\more_scans\CIZ1\CIZ1_537-552_output	WT	1client	EMPGVWGAGGSLKVTI	unknown
postGMF-runs\1client\WT_analysis\more_scans\CIZ1\CIZ1_545-560_output	WT	1client	GGSLKVTILQSSDSRA	unknown
postGMF-runs\1client\WT_analysis\more_scans\CIZ1\CIZ1_553-568_output	WT	1client	LQSSDSRAFSTVPLTP	unknown
postGMF-runs\1client\WT_analysis\more_scans\CIZ1\CIZ1_561-576_output	WT	1client	FSTVPLTPVPRPSDSV	unknown
postGMF-runs\1client\WT_analysis\more_scans\CIZ1\CIZ1_569-584_output	WT	1client	VPRPSDSVSSTPAATS	unknown
postGMF-runs\1client\WT_analysis\more_scans\CIZ1\CIZ1_57-72_output	WT	1client	RGLPPQQPQQPLLNLQ	unknown
postGMF-runs\1client\WT_analysis\more_scans\CIZ1\CIZ1_577-592_output	WT	1client	SSTPAATSTPSKQALQ	unknown
postGMF-runs\1client\WT_analysis\more_scans\CIZ1\CIZ1_585-600_output	WT	1client	TPSKQALQFFCYICKA	unknown
postGMF-runs\1client\WT_analysis\more_scans\CIZ1\CIZ1_593-608_output	WT	1client	FFCYICKASCSSQQEF	unknown
postGMF-runs\1client\WT_analysis\more_scans\CIZ1\CIZ1_601-616_output	WT	1client	SCSSQQEFQDHMSEPQ	unknown
postGMF-runs\1client\WT_analysis\more_scans\CIZ1\CIZ1_609-624_output	WT	1client	QDHMSEPQHQQRLGEI	unknown
postGMF-runs\1client\WT_analysis\more_scans\CIZ1\CIZ1_617-632_output	WT	1client	HQQRLGEIQHMSQACL	unknown
postGMF-runs\1client\WT_analysis\more_scans\CIZ1\CIZ1_625-640_output	WT	1client	QHMSQACLLSLLPVPR	unknown
postGMF-runs\1client\WT_analysis\more_scans\CIZ1\CIZ1_633-648_output	WT	1client	LSLLPVPRDVLETEDE	unknown
postGMF-runs\1client\WT_analysis\more_scans\CIZ1\CIZ1_641-656_output	WT	1client	DVLETEDEEPPPRRWC	unknown
postGMF-runs\1client\WT_analysis\more_scans\CIZ1\CIZ1_649-664_output	WT	1client	EPPPRRWCNTCQLYYM	unknown
postGMF-runs\1client\WT_analysis\more_scans\CIZ1\CIZ1_65-80_output	WT	1client	QQPLLNLQGTNSASLL	unknown
postGMF-runs\1client\WT_analysis\more_scans\CIZ1\CIZ1_657-672_output	WT	1client	NTCQLYYMGDLIQHRR	unknown
postGMF-runs\1client\WT_analysis\more_scans\CIZ1\CIZ1_665-680_output	WT	1client	GDLIQHRRTQDHKIAK	unknown
postGMF-runs\1client\WT_analysis\more_scans\CIZ1\CIZ1_673-688_output	WT	1client	TQDHKIAKQSLRPFCT	unknown
postGMF-runs\1client\WT_analysis\more_scans\CIZ1\CIZ1_681-696_output	WT	1client	QSLRPFCTVCNRYFKT	unknown
postGMF-runs\1client\WT_analysis\more_scans\CIZ1\CIZ1_689-704_output	WT	1client	VCNRYFKTPRKFVEHV	unknown
postGMF-runs\1client\WT_analysis\more_scans\CIZ1\CIZ1_697-712_output	WT	1client	PRKFVEHVKSQGHKDK	unknown
postGMF-runs\1client\WT_analysis\more_scans\CIZ1\CIZ1_705-720_output	WT	1client	KSQGHKDKAKELKSLE	unknown
postGMF-runs\1client\WT_analysis\more_scans\CIZ1\CIZ1_713-728_output	WT	1client	AKELKSLEKEIAGQDE	unknown
postGMF-runs\1client\WT_analysis\more_scans\CIZ1\CIZ1_721-736_output	WT	1client	KEIAGQDEDHFITVDA	unknown
postGMF-runs\1client\WT_analysis\more_scans\CIZ1\CIZ1_729-744_output	WT	1client	DHFITVDAVGCFEGDE	unknown
postGMF-runs\1client\WT_analysis\more_scans\CIZ1\CIZ1_73-88_output	WT	1client	GTNSASLLNGSMLQRA	unknown
postGMF-runs\1client\WT_analysis\more_scans\CIZ1\CIZ1_737-752_output	WT	1client	VGCFEGDEEEEEDDED	unknown
postGMF-runs\1client\WT_analysis\more_scans\CIZ1\CIZ1_745-760_output	WT	1client	EEEEDDEDEEEIEVEE	unknown
postGMF-runs\1client\WT_analysis\more_scans\CIZ1\CIZ1_753-768_output	WT	1client	EEEIEVEEELCKQVRS	unknown
postGMF-runs\1client\WT_analysis\more_scans\CIZ1\CIZ1_761-776_output	WT	1client	ELCKQVRSRDISREEW	unknown
postGMF-runs\1client\WT_analysis\more_scans\CIZ1\CIZ1_769-784_output	WT	1client	RDISREEWKGSETYSP	unknown
postGMF-runs\1client\WT_analysis\more_scans\CIZ1\CIZ1_777-792_output	WT	1client	KGSETYSPNTAYGVDF	unknown
postGMF-runs\1client\WT_analysis\more_scans\CIZ1\CIZ1_785-800_output	WT	1client	NTAYGVDFLVPVMGYI	unknown
postGMF-runs\1client\WT_analysis\more_scans\CIZ1\CIZ1_793-808_output	WT	1client	LVPVMGYICRICHKFY	unknown
postGMF-runs\1client\WT_analysis\more_scans\CIZ1\CIZ1_801-816_output	WT	1client	CRICHKFYHSNSGAQL	unknown
postGMF-runs\1client\WT_analysis\more_scans\CIZ1\CIZ1_809-824_output	WT	1client	HSNSGAQLSHCKSLGH	unknown
postGMF-runs\1client\WT_analysis\more_scans\CIZ1\CIZ1_81-96_output	WT	1client	NGSMLQRALLLQQLQG	unknown
postGMF-runs\1client\WT_analysis\more_scans\CIZ1\CIZ1_817-832_output	WT	1client	SHCKSLGHFENLQKYK	unknown
postGMF-runs\1client\WT_analysis\more_scans\CIZ1\CIZ1_825-840_output	WT	1client	FENLQKYKAAKNPSPT	unknown
postGMF-runs\1client\WT_analysis\more_scans\CIZ1\CIZ1_833-848_output	WT	1client	AAKNPSPTTRPVSRRC	unknown
postGMF-runs\1client\WT_analysis\more_scans\CIZ1\CIZ1_841-856_output	WT	1client	TRPVSRRCAINARNAL	unknown
postGMF-runs\1client\WT_analysis\more_scans\CIZ1\CIZ1_849-864_output	WT	1client	AINARNALTALFTSSG	unknown
postGMF-runs\1client\WT_analysis\more_scans\CIZ1\CIZ1_857-872_output	WT	1client	TALFTSSGRPPSQPNT	unknown
postGMF-runs\1client\WT_analysis\more_scans\CIZ1\CIZ1_865-880_output	WT	1client	RPPSQPNTQDKTPSKV	unknown
postGMF-runs\1client\WT_analysis\more_scans\CIZ1\CIZ1_873-888_output	WT	1client	QDKTPSKVTARPSQPP	unknown
postGMF-runs\1client\WT_analysis\more_scans\CIZ1\CIZ1_881-896_output	WT	1client	TARPSQPPLPRRSTRL	unknown
postGMF-runs\1client\WT_analysis\more_scans\CIZ1\CIZ1_883-898_output	WT	1client	RPSQPPLPRRSTRLKT	unknown
postGMF-runs\1client\WT_analysis\more_scans\CIZ1\CIZ1_89-104_output	WT	1client	LLLQQLQGLDQFAMPP	unknown
postGMF-runs\1client\WT_analysis\more_scans\CIZ1\CIZ1_9-24_output	WT	1client	QLQQQQQQLQQLQQQQ	unknown
postGMF-runs\1client\WT_analysis\more_scans\CIZ1\CIZ1_97-112_output	WT	1client	LDQFAMPPATYDTAGL	unknown
postGMF-runs\1client\WT_analysis\more_scans\ESR1\ESR1_1-16_output	WT	1client	MTMTLHTKASGMALLH	unknown
postGMF-runs\1client\WT_analysis\more_scans\ESR1\ESR1_105-120_output	WT	1client	PSPLMLLHPPPQLSPF	unknown
postGMF-runs\1client\WT_analysis\more_scans\ESR1\ESR1_113-128_output	WT	1client	PPPQLSPFLQPHGQQV	unknown
postGMF-runs\1client\WT_analysis\more_scans\ESR1\ESR1_121-136_output	WT	1client	LQPHGQQVPYYLENEP	unknown
postGMF-runs\1client\WT_analysis\more_scans\ESR1\ESR1_129-144_output	WT	1client	PYYLENEPSGYTVREA	unknown
postGMF-runs\1client\WT_analysis\more_scans\ESR1\ESR1_137-152_output	WT	1client	SGYTVREAGPPAFYRP	unknown
postGMF-runs\1client\WT_analysis\more_scans\ESR1\ESR1_145-160_output	WT	1client	GPPAFYRPNSDNRRQG	unknown
postGMF-runs\1client\WT_analysis\more_scans\ESR1\ESR1_153-168_output	WT	1client	NSDNRRQGGRERLAST	unknown
postGMF-runs\1client\WT_analysis\more_scans\ESR1\ESR1_161-176_output	WT	1client	GRERLASTNDKGSMAM	unknown
postGMF-runs\1client\WT_analysis\more_scans\ESR1\ESR1_169-184_output	WT	1client	NDKGSMAMESAKETRY	unknown
postGMF-runs\1client\WT_analysis\more_scans\ESR1\ESR1_17-32_output	WT	1client	QIQGNELEPLNRPQLK	unknown
postGMF-runs\1client\WT_analysis\more_scans\ESR1\ESR1_177-192_output	WT	1client	ESAKETRYCAVCNDYA	unknown
postGMF-runs\1client\WT_analysis\more_scans\ESR1\ESR1_185-200_output	WT	1client	CAVCNDYASGYHYGVW	unknown
postGMF-runs\1client\WT_analysis\more_scans\ESR1\ESR1_193-208_output	WT	1client	SGYHYGVWSCEGCKAF	unknown
postGMF-runs\1client\WT_analysis\more_scans\ESR1\ESR1_201-216_output	WT	1client	SCEGCKAFFKRSIQGH	unknown
postGMF-runs\1client\WT_analysis\more_scans\ESR1\ESR1_209-224_output	WT	1client	FKRSIQGHNDYMCPAT	unknown
postGMF-runs\1client\WT_analysis\more_scans\ESR1\ESR1_217-232_output	WT	1client	NDYMCPATNQCTIDKN	unknown
postGMF-runs\1client\WT_analysis\more_scans\ESR1\ESR1_225-240_output	WT	1client	NQCTIDKNRRKSCQAC	unknown
postGMF-runs\1client\WT_analysis\more_scans\ESR1\ESR1_233-248_output	WT	1client	RRKSCQACRLRKCYEV	unknown
postGMF-runs\1client\WT_analysis\more_scans\ESR1\ESR1_241-256_output	WT	1client	RLRKCYEVGMMKGGIR	unknown
postGMF-runs\1client\WT_analysis\more_scans\ESR1\ESR1_249-264_output	WT	1client	GMMKGGIRKDRRGGRM	unknown
postGMF-runs\1client\WT_analysis\more_scans\ESR1\ESR1_25-40_output	WT	1client	PLNRPQLKIPLERPLG	unknown
postGMF-runs\1client\WT_analysis\more_scans\ESR1\ESR1_257-272_output	WT	1client	KDRRGGRMLKHKRQRD	unknown
postGMF-runs\1client\WT_analysis\more_scans\ESR1\ESR1_265-280_output	WT	1client	LKHKRQRDDGEGRGEV	unknown
postGMF-runs\1client\WT_analysis\more_scans\ESR1\ESR1_273-288_output	WT	1client	DGEGRGEVGSAGDMRA	unknown
postGMF-runs\1client\WT_analysis\more_scans\ESR1\ESR1_281-296_output	WT	1client	GSAGDMRAANLWPSPL	unknown
postGMF-runs\1client\WT_analysis\more_scans\ESR1\ESR1_289-304_output	WT	1client	ANLWPSPLMIKRSKKN	unknown
postGMF-runs\1client\WT_analysis\more_scans\ESR1\ESR1_297-312_output	WT	1client	MIKRSKKNSLALSLTA	unknown
postGMF-runs\1client\WT_analysis\more_scans\ESR1\ESR1_305-320_output	WT	1client	SLALSLTADQMVSALL	unknown
postGMF-runs\1client\WT_analysis\more_scans\ESR1\ESR1_313-328_output	WT	1client	DQMVSALLDAEPPILY	unknown
postGMF-runs\1client\WT_analysis\more_scans\ESR1\ESR1_321-336_output	WT	1client	DAEPPILYSEYDPTRP	unknown
postGMF-runs\1client\WT_analysis\more_scans\ESR1\ESR1_329-344_output	WT	1client	SEYDPTRPFSEASMMG	unknown
postGMF-runs\1client\WT_analysis\more_scans\ESR1\ESR1_33-48_output	WT	1client	IPLERPLGEVYLDSSK	unknown
postGMF-runs\1client\WT_analysis\more_scans\ESR1\ESR1_337-352_output	WT	1client	FSEASMMGLLTNLADR	unknown
postGMF-runs\1client\WT_analysis\more_scans\ESR1\ESR1_345-360_output	WT	1client	LLTNLADRELVHMINW	unknown
postGMF-runs\1client\WT_analysis\more_scans\ESR1\ESR1_353-368_output	WT	1client	ELVHMINWAKRVPGFV	unknown
postGMF-runs\1client\WT_analysis\more_scans\ESR1\ESR1_361-376_output	WT	1client	AKRVPGFVDLTLHDQV	unknown
postGMF-runs\1client\WT_analysis\more_scans\ESR1\ESR1_369-384_output	WT	1client	DLTLHDQVHLLECAWL	unknown
postGMF-runs\1client\WT_analysis\more_scans\ESR1\ESR1_377-392_output	WT	1client	HLLECAWLEILMIGLV	unknown
postGMF-runs\1client\WT_analysis\more_scans\ESR1\ESR1_385-400_output	WT	1client	EILMIGLVWRSMEHPG	unknown
postGMF-runs\1client\WT_analysis\more_scans\ESR1\ESR1_393-408_output	WT	1client	WRSMEHPGKLLFAPNL	unknown
postGMF-runs\1client\WT_analysis\more_scans\ESR1\ESR1_401-416_output	WT	1client	KLLFAPNLLLDRNQGK	unknown
postGMF-runs\1client\WT_analysis\more_scans\ESR1\ESR1_409-424_output	WT	1client	LLDRNQGKCVEGMVEI	unknown
postGMF-runs\1client\WT_analysis\more_scans\ESR1\ESR1_41-56_output	WT	1client	EVYLDSSKPAVYNYPE	unknown
postGMF-runs\1client\WT_analysis\more_scans\ESR1\ESR1_417-432_output	WT	1client	CVEGMVEIFDMLLATS	unknown
postGMF-runs\1client\WT_analysis\more_scans\ESR1\ESR1_425-440_output	WT	1client	FDMLLATSSRFRMMNL	unknown
postGMF-runs\1client\WT_analysis\more_scans\ESR1\ESR1_433-448_output	WT	1client	SRFRMMNLQGEEFVCL	unknown
postGMF-runs\1client\WT_analysis\more_scans\ESR1\ESR1_441-456_output	WT	1client	QGEEFVCLKSIILLNS	unknown
postGMF-runs\1client\WT_analysis\more_scans\ESR1\ESR1_449-464_output	WT	1client	KSIILLNSGVYTFLSS	unknown
postGMF-runs\1client\WT_analysis\more_scans\ESR1\ESR1_457-472_output	WT	1client	GVYTFLSSTLKSLEEK	unknown
postGMF-runs\1client\WT_analysis\more_scans\ESR1\ESR1_465-480_output	WT	1client	TLKSLEEKDHIHRVLD	unknown
postGMF-runs\1client\WT_analysis\more_scans\ESR1\ESR1_473-488_output	WT	1client	DHIHRVLDKITDTLIH	unknown
postGMF-runs\1client\WT_analysis\more_scans\ESR1\ESR1_481-496_output	WT	1client	KITDTLIHLMAKAGLT	unknown
postGMF-runs\1client\WT_analysis\more_scans\ESR1\ESR1_489-504_output	WT	1client	LMAKAGLTLQQQHQRL	unknown
postGMF-runs\1client\WT_analysis\more_scans\ESR1\ESR1_49-64_output	WT	1client	PAVYNYPEGAAYEFNA	unknown
postGMF-runs\1client\WT_analysis\more_scans\ESR1\ESR1_497-512_output	WT	1client	LQQQHQRLAQLLLILS	unknown
postGMF-runs\1client\WT_analysis\more_scans\ESR1\ESR1_505-520_output	WT	1client	AQLLLILSHIRHMSNK	unknown
postGMF-runs\1client\WT_analysis\more_scans\ESR1\ESR1_513-528_output	WT	1client	HIRHMSNKGMEHLYSM	unknown
postGMF-runs\1client\WT_analysis\more_scans\ESR1\ESR1_521-536_output	WT	1client	GMEHLYSMKCKNVVPL	unknown
postGMF-runs\1client\WT_analysis\more_scans\ESR1\ESR1_529-544_output	WT	1client	KCKNVVPLYDLLLEML	unknown
postGMF-runs\1client\WT_analysis\more_scans\ESR1\ESR1_537-552_output	WT	1client	YDLLLEMLDAHRLHAP	unknown
postGMF-runs\1client\WT_analysis\more_scans\ESR1\ESR1_545-560_output	WT	1client	DAHRLHAPTSRGGASV	unknown
postGMF-runs\1client\WT_analysis\more_scans\ESR1\ESR1_553-568_output	WT	1client	TSRGGASVEETDQSHL	unknown
postGMF-runs\1client\WT_analysis\more_scans\ESR1\ESR1_561-576_output	WT	1client	EETDQSHLATAGSTSS	unknown
postGMF-runs\1client\WT_analysis\more_scans\ESR1\ESR1_569-584_output	WT	1client	ATAGSTSSHSLQKYYI	unknown
postGMF-runs\1client\WT_analysis\more_scans\ESR1\ESR1_57-72_output	WT	1client	GAAYEFNAAAAANAQV	unknown
postGMF-runs\1client\WT_analysis\more_scans\ESR1\ESR1_577-592_output	WT	1client	HSLQKYYITGEAEGFP	unknown
postGMF-runs\1client\WT_analysis\more_scans\ESR1\ESR1_580-595_output	WT	1client	QKYYITGEAEGFPATV	unknown
postGMF-runs\1client\WT_analysis\more_scans\ESR1\ESR1_65-80_output	WT	1client	AAAANAQVYGQTGLPY	unknown
postGMF-runs\1client\WT_analysis\more_scans\ESR1\ESR1_73-88_output	WT	1client	YGQTGLPYGPGSEAAA	unknown
postGMF-runs\1client\WT_analysis\more_scans\ESR1\ESR1_81-96_output	WT	1client	GPGSEAAAFGSNGLGG	unknown
postGMF-runs\1client\WT_analysis\more_scans\ESR1\ESR1_89-104_output	WT	1client	FGSNGLGGFPPLNSVS	unknown
postGMF-runs\1client\WT_analysis\more_scans\ESR1\ESR1_9-24_output	WT	1client	ASGMALLHQIQGNELE	unknown
postGMF-runs\1client\WT_analysis\more_scans\ESR1\ESR1_97-112_output	WT	1client	FPPLNSVSPSPLMLLH	unknown
postGMF-runs\1client\WT_analysis\more_scans\ewg\ewg_1-16_output	WT	1client	MATTSYRLVVAPAGSQ	unknown
postGMF-runs\1client\WT_analysis\more_scans\ewg\ewg_105-120_output	WT	1client	ISSDGSLYEGDLGSMP	unknown
postGMF-runs\1client\WT_analysis\more_scans\ewg\ewg_113-128_output	WT	1client	EGDLGSMPVNDDVAHQ	unknown
postGMF-runs\1client\WT_analysis\more_scans\ewg\ewg_121-136_output	WT	1client	VNDDVAHQLAAAGPVG	unknown
postGMF-runs\1client\WT_analysis\more_scans\ewg\ewg_129-144_output	WT	1client	LAAAGPVGVAAAAAIA	unknown
postGMF-runs\1client\WT_analysis\more_scans\ewg\ewg_137-152_output	WT	1client	VAAAAAIASSKKRKRP	unknown
postGMF-runs\1client\WT_analysis\more_scans\ewg\ewg_145-160_output	WT	1client	SSKKRKRPHCFETNPS	unknown
postGMF-runs\1client\WT_analysis\more_scans\ewg\ewg_153-168_output	WT	1client	HCFETNPSVRKRQQNR	unknown
postGMF-runs\1client\WT_analysis\more_scans\ewg\ewg_161-176_output	WT	1client	VRKRQQNRLLRKLRAI	unknown
postGMF-runs\1client\WT_analysis\more_scans\ewg\ewg_169-184_output	WT	1client	LLRKLRAIIYEFTGRV	unknown
postGMF-runs\1client\WT_analysis\more_scans\ewg\ewg_17-32_output	WT	1client	RSSTGNVVVTTTSSGS	unknown
postGMF-runs\1client\WT_analysis\more_scans\ewg\ewg_177-192_output	WT	1client	IYEFTGRVGKQAVVLV	unknown
postGMF-runs\1client\WT_analysis\more_scans\ewg\ewg_185-200_output	WT	1client	GKQAVVLVATPGKPNT	unknown
postGMF-runs\1client\WT_analysis\more_scans\ewg\ewg_193-208_output	WT	1client	ATPGKPNTSYKVFGAK	unknown
postGMF-runs\1client\WT_analysis\more_scans\ewg\ewg_201-216_output	WT	1client	SYKVFGAKPLEDVLRN	unknown
postGMF-runs\1client\WT_analysis\more_scans\ewg\ewg_209-224_output	WT	1client	PLEDVLRNLKNIVMDE	unknown
postGMF-runs\1client\WT_analysis\more_scans\ewg\ewg_217-232_output	WT	1client	LKNIVMDELDNALAQQ	unknown
postGMF-runs\1client\WT_analysis\more_scans\ewg\ewg_225-240_output	WT	1client	LDNALAQQAPPPPQDD	unknown
postGMF-runs\1client\WT_analysis\more_scans\ewg\ewg_233-248_output	WT	1client	APPPPQDDPSLFELPG	unknown
postGMF-runs\1client\WT_analysis\more_scans\ewg\ewg_241-256_output	WT	1client	PSLFELPGLVIDGIPT	unknown
postGMF-runs\1client\WT_analysis\more_scans\ewg\ewg_249-264_output	WT	1client	LVIDGIPTPVEKMTQA	unknown
postGMF-runs\1client\WT_analysis\more_scans\ewg\ewg_25-40_output	WT	1client	VTTTSSGSHSSNGANG	unknown
postGMF-runs\1client\WT_analysis\more_scans\ewg\ewg_257-272_output	WT	1client	PVEKMTQAQLRAFIPL	unknown
postGMF-runs\1client\WT_analysis\more_scans\ewg\ewg_265-280_output	WT	1client	QLRAFIPLMLKYSTGR	unknown
postGMF-runs\1client\WT_analysis\more_scans\ewg\ewg_273-288_output	WT	1client	MLKYSTGRGKPGWGRE	unknown
postGMF-runs\1client\WT_analysis\more_scans\ewg\ewg_297-312_output	WT	1client	KELPWANVRMDARSED	unknown
postGMF-runs\1client\WT_analysis\more_scans\ewg\ewg_305-320_output	WT	1client	RMDARSEDDKQKISWT	unknown
postGMF-runs\1client\WT_analysis\more_scans\ewg\ewg_313-328_output	WT	1client	DKQKISWTHALRKIVI	unknown
postGMF-runs\1client\WT_analysis\more_scans\ewg\ewg_321-336_output	WT	1client	HALRKIVINCYKYHGR	unknown
postGMF-runs\1client\WT_analysis\more_scans\ewg\ewg_329-344_output	WT	1client	NCYKYHGREDLLPTFA	unknown
postGMF-runs\1client\WT_analysis\more_scans\ewg\ewg_33-48_output	WT	1client	HSSNGANGGTGGTSAG	unknown
postGMF-runs\1client\WT_analysis\more_scans\ewg\ewg_337-352_output	WT	1client	EDLLPTFADDEDKVNA	unknown
postGMF-runs\1client\WT_analysis\more_scans\ewg\ewg_345-360_output	WT	1client	DDEDKVNALISQSGDE	unknown
postGMF-runs\1client\WT_analysis\more_scans\ewg\ewg_353-368_output	WT	1client	LISQSGDEDEDMELSN	unknown
postGMF-runs\1client\WT_analysis\more_scans\ewg\ewg_361-376_output	WT	1client	DEDMELSNPPTIHTVT	unknown
postGMF-runs\1client\WT_analysis\more_scans\ewg\ewg_369-384_output	WT	1client	PPTIHTVTTMTPPTGN	unknown
postGMF-runs\1client\WT_analysis\more_scans\ewg\ewg_377-392_output	WT	1client	TMTPPTGNSNQPQQVN	unknown
postGMF-runs\1client\WT_analysis\more_scans\ewg\ewg_385-400_output	WT	1client	SNQPQQVNVVKINSAG	unknown
postGMF-runs\1client\WT_analysis\more_scans\ewg\ewg_393-408_output	WT	1client	VVKINSAGTVITTHTA	unknown
postGMF-runs\1client\WT_analysis\more_scans\ewg\ewg_401-416_output	WT	1client	TVITTHTAQSNTPAPT	unknown
postGMF-runs\1client\WT_analysis\more_scans\ewg\ewg_409-424_output	WT	1client	QSNTPAPTIIQSTNNQ	unknown
postGMF-runs\1client\WT_analysis\more_scans\ewg\ewg_41-56_output	WT	1client	GTGGTSAGSSTLGSGL	unknown
postGMF-runs\1client\WT_analysis\more_scans\ewg\ewg_417-432_output	WT	1client	IIQSTNNQHVTTTATL	unknown
postGMF-runs\1client\WT_analysis\more_scans\ewg\ewg_425-440_output	WT	1client	HVTTTATLPASTKIEI	unknown
postGMF-runs\1client\WT_analysis\more_scans\ewg\ewg_433-448_output	WT	1client	PASTKIEICQAPAQNQ	unknown
postGMF-runs\1client\WT_analysis\more_scans\ewg\ewg_441-456_output	WT	1client	CQAPAQNQQHHQHHQT	unknown
postGMF-runs\1client\WT_analysis\more_scans\ewg\ewg_449-464_output	WT	1client	QHHQHHQTHLPNAVHI	unknown
postGMF-runs\1client\WT_analysis\more_scans\ewg\ewg_457-472_output	WT	1client	HLPNAVHIQPVAGGQP	unknown
postGMF-runs\1client\WT_analysis\more_scans\ewg\ewg_465-480_output	WT	1client	QPVAGGQPQTIQLTTA	unknown
postGMF-runs\1client\WT_analysis\more_scans\ewg\ewg_473-488_output	WT	1client	QTIQLTTASGTATATA	unknown
postGMF-runs\1client\WT_analysis\more_scans\ewg\ewg_481-496_output	WT	1client	SGTATATAVQTTAAAV	unknown
postGMF-runs\1client\WT_analysis\more_scans\ewg\ewg_489-504_output	WT	1client	VQTTAAAVSAAQAHAH	unknown
postGMF-runs\1client\WT_analysis\more_scans\ewg\ewg_49-64_output	WT	1client	SSTLGSGLNVTTITAT	unknown
postGMF-runs\1client\WT_analysis\more_scans\ewg\ewg_497-512_output	WT	1client	SAAQAHAHSQSQAHSQ	unknown
postGMF-runs\1client\WT_analysis\more_scans\ewg\ewg_505-520_output	WT	1client	SQSQAHSQSSANQTVT	unknown
postGMF-runs\1client\WT_analysis\more_scans\ewg\ewg_513-528_output	WT	1client	SSANQTVTAQQIANAQ	unknown
postGMF-runs\1client\WT_analysis\more_scans\ewg\ewg_521-536_output	WT	1client	AQQIANAQVCIEPITL	unknown
postGMF-runs\1client\WT_analysis\more_scans\ewg\ewg_529-544_output	WT	1client	VCIEPITLSDVDYTTQ	unknown
postGMF-runs\1client\WT_analysis\more_scans\ewg\ewg_537-552_output	WT	1client	SDVDYTTQTVLSQNAD	unknown
postGMF-runs\1client\WT_analysis\more_scans\ewg\ewg_545-560_output	WT	1client	TVLSQNADGTVSLIQV	unknown
postGMF-runs\1client\WT_analysis\more_scans\ewg\ewg_553-568_output	WT	1client	GTVSLIQVDPNNPIIT	unknown
postGMF-runs\1client\WT_analysis\more_scans\ewg\ewg_561-576_output	WT	1client	DPNNPIITLPDGTTAQ	unknown
postGMF-runs\1client\WT_analysis\more_scans\ewg\ewg_569-584_output	WT	1client	LPDGTTAQVQGVATLH	unknown
postGMF-runs\1client\WT_analysis\more_scans\ewg\ewg_57-72_output	WT	1client	NVTTITATSGGQLQSA	unknown
postGMF-runs\1client\WT_analysis\more_scans\ewg\ewg_577-592_output	WT	1client	VQGVATLHQGEGGATI	unknown
postGMF-runs\1client\WT_analysis\more_scans\ewg\ewg_585-600_output	WT	1client	QGEGGATIQTVQSLTD	unknown
postGMF-runs\1client\WT_analysis\more_scans\ewg\ewg_593-608_output	WT	1client	QTVQSLTDVNGHENMT	unknown
postGMF-runs\1client\WT_analysis\more_scans\ewg\ewg_601-616_output	WT	1client	VNGHENMTVDLTETQD	unknown
postGMF-runs\1client\WT_analysis\more_scans\ewg\ewg_609-624_output	WT	1client	VDLTETQDGQIYITTE	unknown
postGMF-runs\1client\WT_analysis\more_scans\ewg\ewg_617-632_output	WT	1client	GQIYITTEDGQGYPVS	unknown
postGMF-runs\1client\WT_analysis\more_scans\ewg\ewg_625-640_output	WT	1client	DGQGYPVSVSNVISVP	unknown
postGMF-runs\1client\WT_analysis\more_scans\ewg\ewg_633-648_output	WT	1client	VSNVISVPVSMYQSVM	unknown
postGMF-runs\1client\WT_analysis\more_scans\ewg\ewg_641-656_output	WT	1client	VSMYQSVMANVQQIQT	unknown
postGMF-runs\1client\WT_analysis\more_scans\ewg\ewg_649-664_output	WT	1client	ANVQQIQTNSDGTVCL	unknown
postGMF-runs\1client\WT_analysis\more_scans\ewg\ewg_65-80_output	WT	1client	SGGQLQSAGNTSQSNG	unknown
postGMF-runs\1client\WT_analysis\more_scans\ewg\ewg_657-672_output	WT	1client	NSDGTVCLAPMQVENG	unknown
postGMF-runs\1client\WT_analysis\more_scans\ewg\ewg_665-680_output	WT	1client	APMQVENGDQLETITM	unknown
postGMF-runs\1client\WT_analysis\more_scans\ewg\ewg_673-688_output	WT	1client	DQLETITMSPGMHQMM	unknown
postGMF-runs\1client\WT_analysis\more_scans\ewg\ewg_681-696_output	WT	1client	SPGMHQMMIQGGPGQE	unknown
postGMF-runs\1client\WT_analysis\more_scans\ewg\ewg_689-704_output	WT	1client	IQGGPGQEPQLVQVVS	unknown
postGMF-runs\1client\WT_analysis\more_scans\ewg\ewg_697-712_output	WT	1client	PQLVQVVSLKDATLLS	unknown
postGMF-runs\1client\WT_analysis\more_scans\ewg\ewg_705-720_output	WT	1client	LKDATLLSKAMEAINS	unknown
postGMF-runs\1client\WT_analysis\more_scans\ewg\ewg_713-728_output	WT	1client	KAMEAINSGNVKSEDT	unknown
postGMF-runs\1client\WT_analysis\more_scans\ewg\ewg_718-733_output	WT	1client	INSGNVKSEDTIIMEQ	unknown
postGMF-runs\1client\WT_analysis\more_scans\ewg\ewg_73-88_output	WT	1client	GNTSQSNGTTYKIEML	unknown
postGMF-runs\1client\WT_analysis\more_scans\ewg\ewg_81-96_output	WT	1client	TTYKIEMLEEDIQSLG	unknown
postGMF-runs\1client\WT_analysis\more_scans\ewg\ewg_89-104_output	WT	1client	EEDIQSLGSDDDDEDL	unknown
postGMF-runs\1client\WT_analysis\more_scans\ewg\ewg_9-24_output	WT	1client	VVAPAGSQRSSTGNVV	unknown
postGMF-runs\1client\WT_analysis\more_scans\ewg\ewg_97-112_output	WT	1client	SDDDDEDLISSDGSLY	unknown
postGMF-runs\1client\WT_analysis\more_scans\GCOM1\GCOM1_1-16_output	WT	1client	MLRSTSTVTLLSGGAA	unknown
postGMF-runs\1client\WT_analysis\more_scans\GCOM1\GCOM1_105-120_output	WT	1client	KDVRATLEKVRKRMYG	unknown
postGMF-runs\1client\WT_analysis\more_scans\GCOM1\GCOM1_113-128_output	WT	1client	KVRKRMYGDYDEMRQK	unknown
postGMF-runs\1client\WT_analysis\more_scans\GCOM1\GCOM1_121-136_output	WT	1client	DYDEMRQKIRQLTQEL	unknown
postGMF-runs\1client\WT_analysis\more_scans\GCOM1\GCOM1_129-144_output	WT	1client	IRQLTQELSVSHAQQE	unknown
postGMF-runs\1client\WT_analysis\more_scans\GCOM1\GCOM1_137-152_output	WT	1client	SVSHAQQEYLENHIQT	unknown
postGMF-runs\1client\WT_analysis\more_scans\GCOM1\GCOM1_145-160_output	WT	1client	YLENHIQTQSSALDRF	unknown
postGMF-runs\1client\WT_analysis\more_scans\GCOM1\GCOM1_153-168_output	WT	1client	QSSALDRFNAMNSALA	unknown
postGMF-runs\1client\WT_analysis\more_scans\GCOM1\GCOM1_161-176_output	WT	1client	NAMNSALASDSIGLQK	unknown
postGMF-runs\1client\WT_analysis\more_scans\GCOM1\GCOM1_169-184_output	WT	1client	SDSIGLQKTLVDVTLE	unknown
postGMF-runs\1client\WT_analysis\more_scans\GCOM1\GCOM1_17-32_output	WT	1client	RTPGAPSRRANVCRLR	unknown
postGMF-runs\1client\WT_analysis\more_scans\GCOM1\GCOM1_177-192_output	WT	1client	TLVDVTLENSNIKDQI	unknown
postGMF-runs\1client\WT_analysis\more_scans\GCOM1\GCOM1_185-200_output	WT	1client	NSNIKDQIRNLQQTYE	unknown
postGMF-runs\1client\WT_analysis\more_scans\GCOM1\GCOM1_193-208_output	WT	1client	RNLQQTYEASMDKLRE	unknown
postGMF-runs\1client\WT_analysis\more_scans\GCOM1\GCOM1_201-216_output	WT	1client	ASMDKLREKQRQLEVA	unknown
postGMF-runs\1client\WT_analysis\more_scans\GCOM1\GCOM1_209-224_output	WT	1client	KQRQLEVAQVENQLLK	unknown
postGMF-runs\1client\WT_analysis\more_scans\GCOM1\GCOM1_217-232_output	WT	1client	QVENQLLKMKVESSQE	unknown
postGMF-runs\1client\WT_analysis\more_scans\GCOM1\GCOM1_225-240_output	WT	1client	MKVESSQEANAEVMRE	unknown
postGMF-runs\1client\WT_analysis\more_scans\GCOM1\GCOM1_233-248_output	WT	1client	ANAEVMREMTKKLYSQ	unknown
postGMF-runs\1client\WT_analysis\more_scans\GCOM1\GCOM1_241-256_output	WT	1client	MTKKLYSQYEEKLQEE	unknown
postGMF-runs\1client\WT_analysis\more_scans\GCOM1\GCOM1_249-264_output	WT	1client	YEEKLQEEQRKHSAEK	unknown
postGMF-runs\1client\WT_analysis\more_scans\GCOM1\GCOM1_25-40_output	WT	1client	RANVCRLRLTVPPESP	unknown
postGMF-runs\1client\WT_analysis\more_scans\GCOM1\GCOM1_257-272_output	WT	1client	QRKHSAEKEALLEETN	unknown
postGMF-runs\1client\WT_analysis\more_scans\GCOM1\GCOM1_265-280_output	WT	1client	EALLEETNSFLKAIEE	unknown
postGMF-runs\1client\WT_analysis\more_scans\GCOM1\GCOM1_273-288_output	WT	1client	SFLKAIEEANKKMQAA	unknown
postGMF-runs\1client\WT_analysis\more_scans\GCOM1\GCOM1_281-296_output	WT	1client	ANKKMQAAEISLEEKD	unknown
postGMF-runs\1client\WT_analysis\more_scans\GCOM1\GCOM1_289-304_output	WT	1client	EISLEEKDQRIGELDR	unknown
postGMF-runs\1client\WT_analysis\more_scans\GCOM1\GCOM1_297-312_output	WT	1client	QRIGELDRLIERMEKE	unknown
postGMF-runs\1client\WT_analysis\more_scans\GCOM1\GCOM1_305-320_output	WT	1client	LIERMEKERHQLQLQL	unknown
postGMF-runs\1client\WT_analysis\more_scans\GCOM1\GCOM1_313-328_output	WT	1client	RHQLQLQLLEHETEMS	unknown
postGMF-runs\1client\WT_analysis\more_scans\GCOM1\GCOM1_321-336_output	WT	1client	LEHETEMSGELTDSDK	unknown
postGMF-runs\1client\WT_analysis\more_scans\GCOM1\GCOM1_329-344_output	WT	1client	GELTDSDKERYQQLEE	unknown
postGMF-runs\1client\WT_analysis\more_scans\GCOM1\GCOM1_33-48_output	WT	1client	LTVPPESPVPEQCEKK	unknown
postGMF-runs\1client\WT_analysis\more_scans\GCOM1\GCOM1_337-352_output	WT	1client	ERYQQLEEASASLRER	unknown
postGMF-runs\1client\WT_analysis\more_scans\GCOM1\GCOM1_345-360_output	WT	1client	ASASLRERIRHLDDMV	unknown
postGMF-runs\1client\WT_analysis\more_scans\GCOM1\GCOM1_353-368_output	WT	1client	IRHLDDMVHCQQKKVK	unknown
postGMF-runs\1client\WT_analysis\more_scans\GCOM1\GCOM1_361-376_output	WT	1client	HCQQKKVKQMVEEIES	unknown
postGMF-runs\1client\WT_analysis\more_scans\GCOM1\GCOM1_369-384_output	WT	1client	QMVEEIESLKKKLQQK	unknown
postGMF-runs\1client\WT_analysis\more_scans\GCOM1\GCOM1_377-392_output	WT	1client	LKKKLQQKQLLILQLL	unknown
postGMF-runs\1client\WT_analysis\more_scans\GCOM1\GCOM1_385-400_output	WT	1client	QLLILQLLEKISFLEG	unknown
postGMF-runs\1client\WT_analysis\more_scans\GCOM1\GCOM1_393-408_output	WT	1client	EKISFLEGENNELQSR	unknown
postGMF-runs\1client\WT_analysis\more_scans\GCOM1\GCOM1_401-416_output	WT	1client	ENNELQSRLDYLTETQ	unknown
postGMF-runs\1client\WT_analysis\more_scans\GCOM1\GCOM1_409-424_output	WT	1client	LDYLTETQAKTEVETR	unknown
postGMF-runs\1client\WT_analysis\more_scans\GCOM1\GCOM1_41-56_output	WT	1client	VPEQCEKKIERKEQLL	unknown
postGMF-runs\1client\WT_analysis\more_scans\GCOM1\GCOM1_417-432_output	WT	1client	AKTEVETREIGVGCDL	unknown
postGMF-runs\1client\WT_analysis\more_scans\GCOM1\GCOM1_425-440_output	WT	1client	EIGVGCDLLPRKFICK	unknown
postGMF-runs\1client\WT_analysis\more_scans\GCOM1\GCOM1_433-448_output	WT	1client	LPRKFICKLPDKGKKI	unknown
postGMF-runs\1client\WT_analysis\more_scans\GCOM1\GCOM1_441-456_output	WT	1client	LPDKGKKIFDSFAKLK	unknown
postGMF-runs\1client\WT_analysis\more_scans\GCOM1\GCOM1_449-464_output	WT	1client	FDSFAKLKAAIAECEE	unknown
postGMF-runs\1client\WT_analysis\more_scans\GCOM1\GCOM1_457-472_output	WT	1client	AAIAECEEVRRKSELF	unknown
postGMF-runs\1client\WT_analysis\more_scans\GCOM1\GCOM1_465-480_output	WT	1client	VRRKSELFNPVSLDCK	unknown
postGMF-runs\1client\WT_analysis\more_scans\GCOM1\GCOM1_473-488_output	WT	1client	NPVSLDCKLRQKAIAE	unknown
postGMF-runs\1client\WT_analysis\more_scans\GCOM1\GCOM1_481-496_output	WT	1client	LRQKAIAEVDVGTDKA	unknown
postGMF-runs\1client\WT_analysis\more_scans\GCOM1\GCOM1_489-504_output	WT	1client	VDVGTDKAQNSDPILD	unknown
postGMF-runs\1client\WT_analysis\more_scans\GCOM1\GCOM1_49-64_output	WT	1client	IERKEQLLDLSNGEPT	unknown
postGMF-runs\1client\WT_analysis\more_scans\GCOM1\GCOM1_497-512_output	WT	1client	QNSDPILDTSSLVPGC	unknown
postGMF-runs\1client\WT_analysis\more_scans\GCOM1\GCOM1_505-520_output	WT	1client	TSSLVPGCSSVDNIKS	unknown
postGMF-runs\1client\WT_analysis\more_scans\GCOM1\GCOM1_513-528_output	WT	1client	SSVDNIKSSQTSQNQG	unknown
postGMF-runs\1client\WT_analysis\more_scans\GCOM1\GCOM1_521-536_output	WT	1client	SQTSQNQGLGRPTLEG	unknown
postGMF-runs\1client\WT_analysis\more_scans\GCOM1\GCOM1_529-544_output	WT	1client	LGRPTLEGDEETSEVE	unknown
postGMF-runs\1client\WT_analysis\more_scans\GCOM1\GCOM1_537-552_output	WT	1client	DEETSEVEYTVNKGPA	unknown
postGMF-runs\1client\WT_analysis\more_scans\GCOM1\GCOM1_545-560_output	WT	1client	YTVNKGPASSNRDRVP	unknown
postGMF-runs\1client\WT_analysis\more_scans\GCOM1\GCOM1_553-568_output	WT	1client	SSNRDRVPPSSEASEH	unknown
postGMF-runs\1client\WT_analysis\more_scans\GCOM1\GCOM1_561-576_output	WT	1client	PSSEASEHHPRHRVSS	unknown
postGMF-runs\1client\WT_analysis\more_scans\GCOM1\GCOM1_569-584_output	WT	1client	HPRHRVSSQAEDTSSS	unknown
postGMF-runs\1client\WT_analysis\more_scans\GCOM1\GCOM1_57-72_output	WT	1client	DLSNGEPTRKLPQGVV	unknown
postGMF-runs\1client\WT_analysis\more_scans\GCOM1\GCOM1_577-592_output	WT	1client	QAEDTSSSFDNLFIDR	unknown
postGMF-runs\1client\WT_analysis\more_scans\GCOM1\GCOM1_585-600_output	WT	1client	FDNLFIDRLQRITIAD	unknown
postGMF-runs\1client\WT_analysis\more_scans\GCOM1\GCOM1_593-608_output	WT	1client	LQRITIADQGEQQSEE	unknown
postGMF-runs\1client\WT_analysis\more_scans\GCOM1\GCOM1_601-616_output	WT	1client	QGEQQSEENASTKNLT	unknown
postGMF-runs\1client\WT_analysis\more_scans\GCOM1\GCOM1_609-624_output	WT	1client	NASTKNLTGLSSGTEK	unknown
postGMF-runs\1client\WT_analysis\more_scans\GCOM1\GCOM1_617-632_output	WT	1client	GLSSGTEKKPHYMEVL	unknown
postGMF-runs\1client\WT_analysis\more_scans\GCOM1\GCOM1_625-640_output	WT	1client	KPHYMEVLEMRAKNPV	unknown
postGMF-runs\1client\WT_analysis\more_scans\GCOM1\GCOM1_633-648_output	WT	1client	EMRAKNPVPQLRKFKT	unknown
postGMF-runs\1client\WT_analysis\more_scans\GCOM1\GCOM1_641-656_output	WT	1client	PQLRKFKTNVLPFRQN	unknown
postGMF-runs\1client\WT_analysis\more_scans\GCOM1\GCOM1_649-664_output	WT	1client	NVLPFRQNDSSSHCQK	unknown
postGMF-runs\1client\WT_analysis\more_scans\GCOM1\GCOM1_65-80_output	WT	1client	RKLPQGVVYGVVRRSD	unknown
postGMF-runs\1client\WT_analysis\more_scans\GCOM1\GCOM1_657-672_output	WT	1client	DSSSHCQKSGSPISSE	unknown
postGMF-runs\1client\WT_analysis\more_scans\GCOM1\GCOM1_665-680_output	WT	1client	SGSPISSEERRRRDKQ	unknown
postGMF-runs\1client\WT_analysis\more_scans\GCOM1\GCOM1_673-688_output	WT	1client	ERRRRDKQHLDDITAA	unknown
postGMF-runs\1client\WT_analysis\more_scans\GCOM1\GCOM1_681-696_output	WT	1client	HLDDITAARLLPLHHM	unknown
postGMF-runs\1client\WT_analysis\more_scans\GCOM1\GCOM1_689-704_output	WT	1client	RLLPLHHMPTQLLSIE	unknown
postGMF-runs\1client\WT_analysis\more_scans\GCOM1\GCOM1_697-712_output	WT	1client	PTQLLSIEESLALQKQ	unknown
postGMF-runs\1client\WT_analysis\more_scans\GCOM1\GCOM1_705-720_output	WT	1client	ESLALQKQQKQNYEEM	unknown
postGMF-runs\1client\WT_analysis\more_scans\GCOM1\GCOM1_713-728_output	WT	1client	QKQNYEEMQAKLAAQK	unknown
postGMF-runs\1client\WT_analysis\more_scans\GCOM1\GCOM1_721-736_output	WT	1client	QAKLAAQKLAERLNIK	unknown
postGMF-runs\1client\WT_analysis\more_scans\GCOM1\GCOM1_729-744_output	WT	1client	LAERLNIKMRSYNPEG	unknown
postGMF-runs\1client\WT_analysis\more_scans\GCOM1\GCOM1_73-88_output	WT	1client	YGVVRRSDQNQQKEMV	unknown
postGMF-runs\1client\WT_analysis\more_scans\GCOM1\GCOM1_737-752_output	WT	1client	MRSYNPEGESSGRYRE	unknown
postGMF-runs\1client\WT_analysis\more_scans\GCOM1\GCOM1_745-760_output	WT	1client	ESSGRYREVRDEDDDW	unknown
postGMF-runs\1client\WT_analysis\more_scans\GCOM1\GCOM1_750-765_output	WT	1client	YREVRDEDDDWSSDEF	unknown
postGMF-runs\1client\WT_analysis\more_scans\GCOM1\GCOM1_81-96_output	WT	1client	QNQQKEMVVYGWSTSQ	unknown
postGMF-runs\1client\WT_analysis\more_scans\GCOM1\GCOM1_89-104_output	WT	1client	VYGWSTSQLKEEMNYI	unknown
postGMF-runs\1client\WT_analysis\more_scans\GCOM1\GCOM1_9-24_output	WT	1client	TLLSGGAARTPGAPSR	unknown
postGMF-runs\1client\WT_analysis\more_scans\GCOM1\GCOM1_97-112_output	WT	1client	LKEEMNYIKDVRATLE	unknown
postGMF-runs\1client\WT_analysis\more_scans\Gphn\Gphn_1-16_output	WT	1client	MATEGMILTNHDHQIR	unknown
postGMF-runs\1client\WT_analysis\more_scans\Gphn\Gphn_105-120_output	WT	1client	FCGLQKGATKEVIERE	unknown
postGMF-runs\1client\WT_analysis\more_scans\Gphn\Gphn_113-128_output	WT	1client	TKEVIEREAPGMALAM	unknown
postGMF-runs\1client\WT_analysis\more_scans\Gphn\Gphn_121-136_output	WT	1client	APGMALAMLMGSLNVT	unknown
postGMF-runs\1client\WT_analysis\more_scans\Gphn\Gphn_129-144_output	WT	1client	LMGSLNVTPLGMLSRP	unknown
postGMF-runs\1client\WT_analysis\more_scans\Gphn\Gphn_137-152_output	WT	1client	PLGMLSRPVCGIRGKT	unknown
postGMF-runs\1client\WT_analysis\more_scans\Gphn\Gphn_145-160_output	WT	1client	VCGIRGKTLIINLPGS	unknown
postGMF-runs\1client\WT_analysis\more_scans\Gphn\Gphn_153-168_output	WT	1client	LIINLPGSKKGSQECF	unknown
postGMF-runs\1client\WT_analysis\more_scans\Gphn\Gphn_161-176_output	WT	1client	KKGSQECFQFILPALP	unknown
postGMF-runs\1client\WT_analysis\more_scans\Gphn\Gphn_169-184_output	WT	1client	QFILPALPHAIDLLRD	unknown
postGMF-runs\1client\WT_analysis\more_scans\Gphn\Gphn_17-32_output	WT	1client	VGVLTVSDSCFRNLAE	unknown
postGMF-runs\1client\WT_analysis\more_scans\Gphn\Gphn_177-192_output	WT	1client	HAIDLLRDAIVKVKEV	unknown
postGMF-runs\1client\WT_analysis\more_scans\Gphn\Gphn_185-200_output	WT	1client	AIVKVKEVHDELEDLP	unknown
postGMF-runs\1client\WT_analysis\more_scans\Gphn\Gphn_193-208_output	WT	1client	HDELEDLPSPPPPLSP	unknown
postGMF-runs\1client\WT_analysis\more_scans\Gphn\Gphn_201-216_output	WT	1client	SPPPPLSPPPTTSPHK	unknown
postGMF-runs\1client\WT_analysis\more_scans\Gphn\Gphn_209-224_output	WT	1client	PPTTSPHKQTEDKGVQ	unknown
postGMF-runs\1client\WT_analysis\more_scans\Gphn\Gphn_217-232_output	WT	1client	QTEDKGVQCEEEEEEK	unknown
postGMF-runs\1client\WT_analysis\more_scans\Gphn\Gphn_225-240_output	WT	1client	CEEEEEEKKDSGVAST	unknown
postGMF-runs\1client\WT_analysis\more_scans\Gphn\Gphn_233-248_output	WT	1client	KDSGVASTEDSSSSHI	unknown
postGMF-runs\1client\WT_analysis\more_scans\Gphn\Gphn_241-256_output	WT	1client	EDSSSSHITAAALAAK	unknown
postGMF-runs\1client\WT_analysis\more_scans\Gphn\Gphn_249-264_output	WT	1client	TAAALAAKIPDSIISR	unknown
postGMF-runs\1client\WT_analysis\more_scans\Gphn\Gphn_25-40_output	WT	1client	SCFRNLAEDRSGINLK	unknown
postGMF-runs\1client\WT_analysis\more_scans\Gphn\Gphn_257-272_output	WT	1client	IPDSIISRGVQVLPRD	unknown
postGMF-runs\1client\WT_analysis\more_scans\Gphn\Gphn_265-280_output	WT	1client	GVQVLPRDTASLSTTP	unknown
postGMF-runs\1client\WT_analysis\more_scans\Gphn\Gphn_273-288_output	WT	1client	TASLSTTPSESPRAQA	unknown
postGMF-runs\1client\WT_analysis\more_scans\Gphn\Gphn_281-296_output	WT	1client	SESPRAQATSRLSTAS	unknown
postGMF-runs\1client\WT_analysis\more_scans\Gphn\Gphn_289-304_output	WT	1client	TSRLSTASCPTPKQIR	unknown
postGMF-runs\1client\WT_analysis\more_scans\Gphn\Gphn_297-312_output	WT	1client	CPTPKQIRRPDESKGV	unknown
postGMF-runs\1client\WT_analysis\more_scans\Gphn\Gphn_305-320_output	WT	1client	RPDESKGVASRVGSLK	unknown
postGMF-runs\1client\WT_analysis\more_scans\Gphn\Gphn_313-328_output	WT	1client	ASRVGSLKVQSRCSSK	unknown
postGMF-runs\1client\WT_analysis\more_scans\Gphn\Gphn_321-336_output	WT	1client	VQSRCSSKENILRASH	unknown
postGMF-runs\1client\WT_analysis\more_scans\Gphn\Gphn_329-344_output	WT	1client	ENILRASHSAVDITKV	unknown
postGMF-runs\1client\WT_analysis\more_scans\Gphn\Gphn_33-48_output	WT	1client	DRSGINLKDLVQDPSL	unknown
postGMF-runs\1client\WT_analysis\more_scans\Gphn\Gphn_337-352_output	WT	1client	SAVDITKVARRHRMSP	unknown
postGMF-runs\1client\WT_analysis\more_scans\Gphn\Gphn_345-360_output	WT	1client	ARRHRMSPFPLTSMDK	unknown
postGMF-runs\1client\WT_analysis\more_scans\Gphn\Gphn_353-368_output	WT	1client	FPLTSMDKAFITVLEM	unknown
postGMF-runs\1client\WT_analysis\more_scans\Gphn\Gphn_361-376_output	WT	1client	AFITVLEMTPVLGTEI	unknown
postGMF-runs\1client\WT_analysis\more_scans\Gphn\Gphn_369-384_output	WT	1client	TPVLGTEIINYRDGMG	unknown
postGMF-runs\1client\WT_analysis\more_scans\Gphn\Gphn_377-392_output	WT	1client	INYRDGMGRVLAQDVY	unknown
postGMF-runs\1client\WT_analysis\more_scans\Gphn\Gphn_385-400_output	WT	1client	RVLAQDVYAKDNLPPF	unknown
postGMF-runs\1client\WT_analysis\more_scans\Gphn\Gphn_393-408_output	WT	1client	AKDNLPPFPASVKDGY	unknown
postGMF-runs\1client\WT_analysis\more_scans\Gphn\Gphn_401-416_output	WT	1client	PASVKDGYAVRAADGP	unknown
postGMF-runs\1client\WT_analysis\more_scans\Gphn\Gphn_409-424_output	WT	1client	AVRAADGPGDRFIIGE	unknown
postGMF-runs\1client\WT_analysis\more_scans\Gphn\Gphn_41-56_output	WT	1client	DLVQDPSLLGGTISAY	unknown
postGMF-runs\1client\WT_analysis\more_scans\Gphn\Gphn_417-432_output	WT	1client	GDRFIIGESQAGEQPT	unknown
postGMF-runs\1client\WT_analysis\more_scans\Gphn\Gphn_425-440_output	WT	1client	SQAGEQPTQTVMPGQV	unknown
postGMF-runs\1client\WT_analysis\more_scans\Gphn\Gphn_433-448_output	WT	1client	QTVMPGQVMRVTTGAP	unknown
postGMF-runs\1client\WT_analysis\more_scans\Gphn\Gphn_441-456_output	WT	1client	MRVTTGAPIPCGADAV	unknown
postGMF-runs\1client\WT_analysis\more_scans\Gphn\Gphn_449-464_output	WT	1client	IPCGADAVVQVEDTEL	unknown
postGMF-runs\1client\WT_analysis\more_scans\Gphn\Gphn_457-472_output	WT	1client	VQVEDTELIRESDDGT	unknown
postGMF-runs\1client\WT_analysis\more_scans\Gphn\Gphn_465-480_output	WT	1client	IRESDDGTEELEVRIL	unknown
postGMF-runs\1client\WT_analysis\more_scans\Gphn\Gphn_473-488_output	WT	1client	EELEVRILVQARPGQD	unknown
postGMF-runs\1client\WT_analysis\more_scans\Gphn\Gphn_481-496_output	WT	1client	VQARPGQDIRPIGHDI	unknown
postGMF-runs\1client\WT_analysis\more_scans\Gphn\Gphn_489-504_output	WT	1client	IRPIGHDIKRGECVLA	unknown
postGMF-runs\1client\WT_analysis\more_scans\Gphn\Gphn_49-64_output	WT	1client	LGGTISAYKIVPDEIE	unknown
postGMF-runs\1client\WT_analysis\more_scans\Gphn\Gphn_497-512_output	WT	1client	KRGECVLAKGTHMGPS	unknown
postGMF-runs\1client\WT_analysis\more_scans\Gphn\Gphn_505-520_output	WT	1client	KGTHMGPSEIGLLATV	unknown
postGMF-runs\1client\WT_analysis\more_scans\Gphn\Gphn_513-528_output	WT	1client	EIGLLATVGVTEVEVN	unknown
postGMF-runs\1client\WT_analysis\more_scans\Gphn\Gphn_521-536_output	WT	1client	GVTEVEVNKFPVVAVM	unknown
postGMF-runs\1client\WT_analysis\more_scans\Gphn\Gphn_529-544_output	WT	1client	KFPVVAVMSTGNELLN	unknown
postGMF-runs\1client\WT_analysis\more_scans\Gphn\Gphn_537-552_output	WT	1client	STGNELLNPEDDLLPG	unknown
postGMF-runs\1client\WT_analysis\more_scans\Gphn\Gphn_545-560_output	WT	1client	PEDDLLPGKIRDSNRS	unknown
postGMF-runs\1client\WT_analysis\more_scans\Gphn\Gphn_553-568_output	WT	1client	KIRDSNRSTLLATIQE	unknown
postGMF-runs\1client\WT_analysis\more_scans\Gphn\Gphn_561-576_output	WT	1client	TLLATIQEHGYPTINL	unknown
postGMF-runs\1client\WT_analysis\more_scans\Gphn\Gphn_569-584_output	WT	1client	HGYPTINLGIVGDNPD	unknown
postGMF-runs\1client\WT_analysis\more_scans\Gphn\Gphn_57-72_output	WT	1client	KIVPDEIEEIKETLID	unknown
postGMF-runs\1client\WT_analysis\more_scans\Gphn\Gphn_577-592_output	WT	1client	GIVGDNPDDLLNALNE	unknown
postGMF-runs\1client\WT_analysis\more_scans\Gphn\Gphn_585-600_output	WT	1client	DLLNALNEGISRADVI	unknown
postGMF-runs\1client\WT_analysis\more_scans\Gphn\Gphn_593-608_output	WT	1client	GISRADVIITSGGVSM	unknown
postGMF-runs\1client\WT_analysis\more_scans\Gphn\Gphn_601-616_output	WT	1client	ITSGGVSMGEKDYLKQ	unknown
postGMF-runs\1client\WT_analysis\more_scans\Gphn\Gphn_609-624_output	WT	1client	GEKDYLKQVLDIDLHA	unknown
postGMF-runs\1client\WT_analysis\more_scans\Gphn\Gphn_617-632_output	WT	1client	VLDIDLHAQIHFGRVF	unknown
postGMF-runs\1client\WT_analysis\more_scans\Gphn\Gphn_625-640_output	WT	1client	QIHFGRVFMKPGLPTT	unknown
postGMF-runs\1client\WT_analysis\more_scans\Gphn\Gphn_633-648_output	WT	1client	MKPGLPTTFATLDIDG	unknown
postGMF-runs\1client\WT_analysis\more_scans\Gphn\Gphn_641-656_output	WT	1client	FATLDIDGVRKIIFAL	unknown
postGMF-runs\1client\WT_analysis\more_scans\Gphn\Gphn_649-664_output	WT	1client	VRKIIFALPGNPVSAV	unknown
postGMF-runs\1client\WT_analysis\more_scans\Gphn\Gphn_65-80_output	WT	1client	EIKETLIDWCDEKELN	unknown
postGMF-runs\1client\WT_analysis\more_scans\Gphn\Gphn_657-672_output	WT	1client	PGNPVSAVVTCNLFVV	unknown
postGMF-runs\1client\WT_analysis\more_scans\Gphn\Gphn_665-680_output	WT	1client	VTCNLFVVPALRKMQG	unknown
postGMF-runs\1client\WT_analysis\more_scans\Gphn\Gphn_673-688_output	WT	1client	PALRKMQGILDPRPTI	unknown
postGMF-runs\1client\WT_analysis\more_scans\Gphn\Gphn_681-696_output	WT	1client	ILDPRPTIIKARLSCD	unknown
postGMF-runs\1client\WT_analysis\more_scans\Gphn\Gphn_689-704_output	WT	1client	IKARLSCDVKLDPRPE	unknown
postGMF-runs\1client\WT_analysis\more_scans\Gphn\Gphn_697-712_output	WT	1client	VKLDPRPEYHRCILTW	unknown
postGMF-runs\1client\WT_analysis\more_scans\Gphn\Gphn_705-720_output	WT	1client	YHRCILTWHHQEPLPW	unknown
postGMF-runs\1client\WT_analysis\more_scans\Gphn\Gphn_713-728_output	WT	1client	HHQEPLPWAQSTGNQM	unknown
postGMF-runs\1client\WT_analysis\more_scans\Gphn\Gphn_721-736_output	WT	1client	AQSTGNQMSSRLMSMR	unknown
postGMF-runs\1client\WT_analysis\more_scans\Gphn\Gphn_729-744_output	WT	1client	SSRLMSMRSANGLLML	unknown
postGMF-runs\1client\WT_analysis\more_scans\Gphn\Gphn_73-88_output	WT	1client	WCDEKELNLILTTGGT	unknown
postGMF-runs\1client\WT_analysis\more_scans\Gphn\Gphn_737-752_output	WT	1client	SANGLLMLPPKTEQYV	unknown
postGMF-runs\1client\WT_analysis\more_scans\Gphn\Gphn_745-760_output	WT	1client	PPKTEQYVELHKGEVV	unknown
postGMF-runs\1client\WT_analysis\more_scans\Gphn\Gphn_753-768_output	WT	1client	ELHKGEVVDVMVIGRL	unknown
postGMF-runs\1client\WT_analysis\more_scans\Gphn\Gphn_81-96_output	WT	1client	LILTTGGTGFAPRDVT	unknown
postGMF-runs\1client\WT_analysis\more_scans\Gphn\Gphn_89-104_output	WT	1client	GFAPRDVTPEKFPTFP	unknown
postGMF-runs\1client\WT_analysis\more_scans\Gphn\Gphn_9-24_output	WT	1client	TNHDHQIRVGVLTVSD	unknown
postGMF-runs\1client\WT_analysis\more_scans\Gphn\Gphn_97-112_output	WT	1client	PEKFPTFPFCGLQKGA	unknown
postGMF-runs\1client\WT_analysis\more_scans\HTATSF1\HTATSF1_1-16_output	WT	1client	MSGTNLDGNDEFDEQL	unknown
postGMF-runs\1client\WT_analysis\more_scans\HTATSF1\HTATSF1_105-120_output	WT	1client	APEPTDARKKGEKRKA	unknown
postGMF-runs\1client\WT_analysis\more_scans\HTATSF1\HTATSF1_113-128_output	WT	1client	KKGEKRKAESGWFHVE	unknown
postGMF-runs\1client\WT_analysis\more_scans\HTATSF1\HTATSF1_121-136_output	WT	1client	ESGWFHVEEDRNTNVY	unknown
postGMF-runs\1client\WT_analysis\more_scans\HTATSF1\HTATSF1_129-144_output	WT	1client	EDRNTNVYVSGLPPDI	unknown
postGMF-runs\1client\WT_analysis\more_scans\HTATSF1\HTATSF1_137-152_output	WT	1client	VSGLPPDITVDEFIQL	unknown
postGMF-runs\1client\WT_analysis\more_scans\HTATSF1\HTATSF1_145-160_output	WT	1client	TVDEFIQLMSKFGIIM	unknown
postGMF-runs\1client\WT_analysis\more_scans\HTATSF1\HTATSF1_153-168_output	WT	1client	MSKFGIIMRDPQTEEF	unknown
postGMF-runs\1client\WT_analysis\more_scans\HTATSF1\HTATSF1_161-176_output	WT	1client	RDPQTEEFKVKLYKDN	unknown
postGMF-runs\1client\WT_analysis\more_scans\HTATSF1\HTATSF1_169-184_output	WT	1client	KVKLYKDNQGNLKGDG	unknown
postGMF-runs\1client\WT_analysis\more_scans\HTATSF1\HTATSF1_17-32_output	WT	1client	RMQELYGDGKDGDTQT	unknown
postGMF-runs\1client\WT_analysis\more_scans\HTATSF1\HTATSF1_177-192_output	WT	1client	QGNLKGDGLCCYLKRE	unknown
postGMF-runs\1client\WT_analysis\more_scans\HTATSF1\HTATSF1_185-200_output	WT	1client	LCCYLKRESVELALKL	unknown
postGMF-runs\1client\WT_analysis\more_scans\HTATSF1\HTATSF1_193-208_output	WT	1client	SVELALKLLDEDEIRG	unknown
postGMF-runs\1client\WT_analysis\more_scans\HTATSF1\HTATSF1_201-216_output	WT	1client	LDEDEIRGYKLHVEVA	unknown
postGMF-runs\1client\WT_analysis\more_scans\HTATSF1\HTATSF1_209-224_output	WT	1client	YKLHVEVAKFQLKGEY	unknown
postGMF-runs\1client\WT_analysis\more_scans\HTATSF1\HTATSF1_217-232_output	WT	1client	KFQLKGEYDASKKKKK	unknown
postGMF-runs\1client\WT_analysis\more_scans\HTATSF1\HTATSF1_225-240_output	WT	1client	DASKKKKKCKDYKKKL	unknown
postGMF-runs\1client\WT_analysis\more_scans\HTATSF1\HTATSF1_233-248_output	WT	1client	CKDYKKKLSMQQKQLD	unknown
postGMF-runs\1client\WT_analysis\more_scans\HTATSF1\HTATSF1_241-256_output	WT	1client	SMQQKQLDWRPERRAG	unknown
postGMF-runs\1client\WT_analysis\more_scans\HTATSF1\HTATSF1_249-264_output	WT	1client	WRPERRAGPSRMRHER	unknown
postGMF-runs\1client\WT_analysis\more_scans\HTATSF1\HTATSF1_25-40_output	WT	1client	GKDGDTQTDAGGEPDS	unknown
postGMF-runs\1client\WT_analysis\more_scans\HTATSF1\HTATSF1_257-272_output	WT	1client	PSRMRHERVVIIKNMF	unknown
postGMF-runs\1client\WT_analysis\more_scans\HTATSF1\HTATSF1_265-280_output	WT	1client	VVIIKNMFHPMDFEDD	unknown
postGMF-runs\1client\WT_analysis\more_scans\HTATSF1\HTATSF1_273-288_output	WT	1client	HPMDFEDDPLVLNEIR	unknown
postGMF-runs\1client\WT_analysis\more_scans\HTATSF1\HTATSF1_281-296_output	WT	1client	PLVLNEIREDLRVECS	unknown
postGMF-runs\1client\WT_analysis\more_scans\HTATSF1\HTATSF1_289-304_output	WT	1client	EDLRVECSKFGQIRKL	unknown
postGMF-runs\1client\WT_analysis\more_scans\HTATSF1\HTATSF1_297-312_output	WT	1client	KFGQIRKLLLFDRHPD	unknown
postGMF-runs\1client\WT_analysis\more_scans\HTATSF1\HTATSF1_305-320_output	WT	1client	LLFDRHPDGVASVSFR	unknown
postGMF-runs\1client\WT_analysis\more_scans\HTATSF1\HTATSF1_313-328_output	WT	1client	GVASVSFRDPEEADYC	unknown
postGMF-runs\1client\WT_analysis\more_scans\HTATSF1\HTATSF1_321-336_output	WT	1client	DPEEADYCIQTLDGRW	unknown
postGMF-runs\1client\WT_analysis\more_scans\HTATSF1\HTATSF1_329-344_output	WT	1client	IQTLDGRWFGGRQITA	unknown
postGMF-runs\1client\WT_analysis\more_scans\HTATSF1\HTATSF1_33-48_output	WT	1client	DAGGEPDSLGQQPTDT	unknown
postGMF-runs\1client\WT_analysis\more_scans\HTATSF1\HTATSF1_337-352_output	WT	1client	FGGRQITAQAWDGTTD	unknown
postGMF-runs\1client\WT_analysis\more_scans\HTATSF1\HTATSF1_345-360_output	WT	1client	QAWDGTTDYQVEETSR	unknown
postGMF-runs\1client\WT_analysis\more_scans\HTATSF1\HTATSF1_353-368_output	WT	1client	YQVEETSREREERLRG	unknown
postGMF-runs\1client\WT_analysis\more_scans\HTATSF1\HTATSF1_361-376_output	WT	1client	EREERLRGWEAFLNAP	unknown
postGMF-runs\1client\WT_analysis\more_scans\HTATSF1\HTATSF1_369-384_output	WT	1client	WEAFLNAPEANRGLRR	unknown
postGMF-runs\1client\WT_analysis\more_scans\HTATSF1\HTATSF1_377-392_output	WT	1client	EANRGLRRSDSVSASE	unknown
postGMF-runs\1client\WT_analysis\more_scans\HTATSF1\HTATSF1_385-400_output	WT	1client	SDSVSASERAGPSRAR	unknown
postGMF-runs\1client\WT_analysis\more_scans\HTATSF1\HTATSF1_393-408_output	WT	1client	RAGPSRARHFSEHPST	unknown
postGMF-runs\1client\WT_analysis\more_scans\HTATSF1\HTATSF1_401-416_output	WT	1client	HFSEHPSTSKMNAQET	unknown
postGMF-runs\1client\WT_analysis\more_scans\HTATSF1\HTATSF1_409-424_output	WT	1client	SKMNAQETATGMAFEE	unknown
postGMF-runs\1client\WT_analysis\more_scans\HTATSF1\HTATSF1_41-56_output	WT	1client	LGQQPTDTPYEWDLDK	unknown
postGMF-runs\1client\WT_analysis\more_scans\HTATSF1\HTATSF1_417-432_output	WT	1client	ATGMAFEEPIDEKKFE	unknown
postGMF-runs\1client\WT_analysis\more_scans\HTATSF1\HTATSF1_425-440_output	WT	1client	PIDEKKFEKTEDGGEF	unknown
postGMF-runs\1client\WT_analysis\more_scans\HTATSF1\HTATSF1_433-448_output	WT	1client	KTEDGGEFEEGASENN	unknown
postGMF-runs\1client\WT_analysis\more_scans\HTATSF1\HTATSF1_441-456_output	WT	1client	EEGASENNAKESSPEK	unknown
postGMF-runs\1client\WT_analysis\more_scans\HTATSF1\HTATSF1_449-464_output	WT	1client	AKESSPEKEAEEGCPE	unknown
postGMF-runs\1client\WT_analysis\more_scans\HTATSF1\HTATSF1_457-472_output	WT	1client	EAEEGCPEKESEEGCP	unknown
postGMF-runs\1client\WT_analysis\more_scans\HTATSF1\HTATSF1_465-480_output	WT	1client	KESEEGCPKRGFEGSC	unknown
postGMF-runs\1client\WT_analysis\more_scans\HTATSF1\HTATSF1_473-488_output	WT	1client	KRGFEGSCSQKESEEG	unknown
postGMF-runs\1client\WT_analysis\more_scans\HTATSF1\HTATSF1_481-496_output	WT	1client	SQKESEEGNPVRGSEE	unknown
postGMF-runs\1client\WT_analysis\more_scans\HTATSF1\HTATSF1_489-504_output	WT	1client	NPVRGSEEDSPKKESK	unknown
postGMF-runs\1client\WT_analysis\more_scans\HTATSF1\HTATSF1_497-512_output	WT	1client	DSPKKESKKKTLKNDC	unknown
postGMF-runs\1client\WT_analysis\more_scans\HTATSF1\HTATSF1_505-520_output	WT	1client	KKTLKNDCEENGLAKE	unknown
postGMF-runs\1client\WT_analysis\more_scans\HTATSF1\HTATSF1_513-528_output	WT	1client	EENGLAKESEDDLNKE	unknown
postGMF-runs\1client\WT_analysis\more_scans\HTATSF1\HTATSF1_521-536_output	WT	1client	SEDDLNKESEEEVGPT	unknown
postGMF-runs\1client\WT_analysis\more_scans\HTATSF1\HTATSF1_529-544_output	WT	1client	SEEEVGPTKESEEDDS	unknown
postGMF-runs\1client\WT_analysis\more_scans\HTATSF1\HTATSF1_537-552_output	WT	1client	KESEEDDSEKESDEDC	unknown
postGMF-runs\1client\WT_analysis\more_scans\HTATSF1\HTATSF1_545-560_output	WT	1client	EKESDEDCSEKQSEDG	unknown
postGMF-runs\1client\WT_analysis\more_scans\HTATSF1\HTATSF1_553-568_output	WT	1client	SEKQSEDGSEREFEEN	unknown
postGMF-runs\1client\WT_analysis\more_scans\HTATSF1\HTATSF1_561-576_output	WT	1client	SEREFEENGLEKDLDE	unknown
postGMF-runs\1client\WT_analysis\more_scans\HTATSF1\HTATSF1_569-584_output	WT	1client	GLEKDLDEEGSEKELH	unknown
postGMF-runs\1client\WT_analysis\more_scans\HTATSF1\HTATSF1_57-72_output	WT	1client	KAWFPKITEDFIATYQ	unknown
postGMF-runs\1client\WT_analysis\more_scans\HTATSF1\HTATSF1_577-592_output	WT	1client	EGSEKELHENVLDKEL	unknown
postGMF-runs\1client\WT_analysis\more_scans\HTATSF1\HTATSF1_585-600_output	WT	1client	ENVLDKELEENDSENS	unknown
postGMF-runs\1client\WT_analysis\more_scans\HTATSF1\HTATSF1_593-608_output	WT	1client	EENDSENSEFEDDGSE	unknown
postGMF-runs\1client\WT_analysis\more_scans\HTATSF1\HTATSF1_601-616_output	WT	1client	EFEDDGSEKVLDEEGS	unknown
postGMF-runs\1client\WT_analysis\more_scans\HTATSF1\HTATSF1_609-624_output	WT	1client	KVLDEEGSEREFDEDS	unknown
postGMF-runs\1client\WT_analysis\more_scans\HTATSF1\HTATSF1_617-632_output	WT	1client	EREFDEDSDEKEEEED	unknown
postGMF-runs\1client\WT_analysis\more_scans\HTATSF1\HTATSF1_625-640_output	WT	1client	DEKEEEEDTYEKVFDD	unknown
postGMF-runs\1client\WT_analysis\more_scans\HTATSF1\HTATSF1_633-648_output	WT	1client	TYEKVFDDESDEKEDE	unknown
postGMF-runs\1client\WT_analysis\more_scans\HTATSF1\HTATSF1_641-656_output	WT	1client	ESDEKEDEEYADEKGL	unknown
postGMF-runs\1client\WT_analysis\more_scans\HTATSF1\HTATSF1_649-664_output	WT	1client	EYADEKGLEAADKKAE	unknown
postGMF-runs\1client\WT_analysis\more_scans\HTATSF1\HTATSF1_65-80_output	WT	1client	EDFIATYQANYGFSND	unknown
postGMF-runs\1client\WT_analysis\more_scans\HTATSF1\HTATSF1_657-672_output	WT	1client	EAADKKAEEGDADEKL	unknown
postGMF-runs\1client\WT_analysis\more_scans\HTATSF1\HTATSF1_665-680_output	WT	1client	EGDADEKLFEESDDKE	unknown
postGMF-runs\1client\WT_analysis\more_scans\HTATSF1\HTATSF1_673-688_output	WT	1client	FEESDDKEDEDADGKE	unknown
postGMF-runs\1client\WT_analysis\more_scans\HTATSF1\HTATSF1_681-696_output	WT	1client	DEDADGKEVEDADEKL	unknown
postGMF-runs\1client\WT_analysis\more_scans\HTATSF1\HTATSF1_689-704_output	WT	1client	VEDADEKLFEDDDSNE	unknown
postGMF-runs\1client\WT_analysis\more_scans\HTATSF1\HTATSF1_697-712_output	WT	1client	FEDDDSNEKLFDEEED	unknown
postGMF-runs\1client\WT_analysis\more_scans\HTATSF1\HTATSF1_705-720_output	WT	1client	KLFDEEEDSSEKLFDD	unknown
postGMF-runs\1client\WT_analysis\more_scans\HTATSF1\HTATSF1_713-728_output	WT	1client	SSEKLFDDSDERGTLG	unknown
postGMF-runs\1client\WT_analysis\more_scans\HTATSF1\HTATSF1_721-736_output	WT	1client	SDERGTLGGFGSVEEG	unknown
postGMF-runs\1client\WT_analysis\more_scans\HTATSF1\HTATSF1_729-744_output	WT	1client	GFGSVEEGPLSTGSSF	unknown
postGMF-runs\1client\WT_analysis\more_scans\HTATSF1\HTATSF1_73-88_output	WT	1client	ANYGFSNDGASSSTAN	unknown
postGMF-runs\1client\WT_analysis\more_scans\HTATSF1\HTATSF1_737-752_output	WT	1client	PLSTGSSFILSSDDDD	unknown
postGMF-runs\1client\WT_analysis\more_scans\HTATSF1\HTATSF1_740-755_output	WT	1client	TGSSFILSSDDDDDDI	unknown
postGMF-runs\1client\WT_analysis\more_scans\HTATSF1\HTATSF1_81-96_output	WT	1client	GASSSTANVEDVHART	unknown
postGMF-runs\1client\WT_analysis\more_scans\HTATSF1\HTATSF1_89-104_output	WT	1client	VEDVHARTAEEPPQEK	unknown
postGMF-runs\1client\WT_analysis\more_scans\HTATSF1\HTATSF1_9-24_output	WT	1client	NDEFDEQLRMQELYGD	unknown
postGMF-runs\1client\WT_analysis\more_scans\HTATSF1\HTATSF1_97-112_output	WT	1client	AEEPPQEKAPEPTDAR	unknown
postGMF-runs\1client\WT_analysis\more_scans\KIBRA\KIBRA_1-16_output	WT	1client	MPRPELPLPEGWEEAR	unknown
postGMF-runs\1client\WT_analysis\more_scans\KIBRA\KIBRA_1001-1016_output	WT	1client	WHSQLTQEISVLKELK	unknown
postGMF-runs\1client\WT_analysis\more_scans\KIBRA\KIBRA_1009-1024_output	WT	1client	ISVLKELKEQLEQAKS	unknown
postGMF-runs\1client\WT_analysis\more_scans\KIBRA\KIBRA_1017-1032_output	WT	1client	EQLEQAKSHGEKELPQ	unknown
postGMF-runs\1client\WT_analysis\more_scans\KIBRA\KIBRA_1025-1040_output	WT	1client	HGEKELPQWLREDERF	unknown
postGMF-runs\1client\WT_analysis\more_scans\KIBRA\KIBRA_1033-1048_output	WT	1client	WLREDERFRLLLRMLE	unknown
postGMF-runs\1client\WT_analysis\more_scans\KIBRA\KIBRA_1041-1056_output	WT	1client	RLLLRMLEKRQMDRAE	unknown
postGMF-runs\1client\WT_analysis\more_scans\KIBRA\KIBRA_1049-1064_output	WT	1client	KRQMDRAEHKGELQTD	unknown
postGMF-runs\1client\WT_analysis\more_scans\KIBRA\KIBRA_105-120_output	WT	1client	EALSAQKEIYQVKQQR	unknown
postGMF-runs\1client\WT_analysis\more_scans\KIBRA\KIBRA_1057-1072_output	WT	1client	HKGELQTDKMMRAAAK	unknown
postGMF-runs\1client\WT_analysis\more_scans\KIBRA\KIBRA_1065-1080_output	WT	1client	KMMRAAAKDVHRLRGQ	unknown
postGMF-runs\1client\WT_analysis\more_scans\KIBRA\KIBRA_1073-1088_output	WT	1client	DVHRLRGQSCKEPPEV	unknown
postGMF-runs\1client\WT_analysis\more_scans\KIBRA\KIBRA_1081-1096_output	WT	1client	SCKEPPEVQSFREKMA	unknown
postGMF-runs\1client\WT_analysis\more_scans\KIBRA\KIBRA_1089-1104_output	WT	1client	QSFREKMAFFTRPRMN	unknown
postGMF-runs\1client\WT_analysis\more_scans\KIBRA\KIBRA_1097-1112_output	WT	1client	FFTRPRMNIPALSADD	unknown
postGMF-runs\1client\WT_analysis\more_scans\KIBRA\KIBRA_1098-1113_output	WT	1client	FTRPRMNIPALSADDV	unknown
postGMF-runs\1client\WT_analysis\more_scans\KIBRA\KIBRA_113-128_output	WT	1client	IYQVKQQRLELAQQEY	unknown
postGMF-runs\1client\WT_analysis\more_scans\KIBRA\KIBRA_121-136_output	WT	1client	LELAQQEYQQLHAVWE	unknown
postGMF-runs\1client\WT_analysis\more_scans\KIBRA\KIBRA_129-144_output	WT	1client	QQLHAVWEHKLGSQVS	unknown
postGMF-runs\1client\WT_analysis\more_scans\KIBRA\KIBRA_137-152_output	WT	1client	HKLGSQVSLVSGSSSS	unknown
postGMF-runs\1client\WT_analysis\more_scans\KIBRA\KIBRA_145-160_output	WT	1client	LVSGSSSSSKYDPEIL	unknown
postGMF-runs\1client\WT_analysis\more_scans\KIBRA\KIBRA_153-168_output	WT	1client	SKYDPEILKAEIATAK	unknown
postGMF-runs\1client\WT_analysis\more_scans\KIBRA\KIBRA_161-176_output	WT	1client	KAEIATAKSRVNKLKR	unknown
postGMF-runs\1client\WT_analysis\more_scans\KIBRA\KIBRA_169-184_output	WT	1client	SRVNKLKREMVHLQHE	unknown
postGMF-runs\1client\WT_analysis\more_scans\KIBRA\KIBRA_17-32_output	WT	1client	DFDGKVYYIDHTNRTT	unknown
postGMF-runs\1client\WT_analysis\more_scans\KIBRA\KIBRA_177-192_output	WT	1client	EMVHLQHELQFKERGF	unknown
postGMF-runs\1client\WT_analysis\more_scans\KIBRA\KIBRA_185-200_output	WT	1client	LQFKERGFQTLKKIDK	unknown
postGMF-runs\1client\WT_analysis\more_scans\KIBRA\KIBRA_193-208_output	WT	1client	QTLKKIDKKMSDAQGS	unknown
postGMF-runs\1client\WT_analysis\more_scans\KIBRA\KIBRA_201-216_output	WT	1client	KMSDAQGSYKLDEAQA	unknown
postGMF-runs\1client\WT_analysis\more_scans\KIBRA\KIBRA_209-224_output	WT	1client	YKLDEAQAVLRETKAI	unknown
postGMF-runs\1client\WT_analysis\more_scans\KIBRA\KIBRA_217-232_output	WT	1client	VLRETKAIKKAITCGE	unknown
postGMF-runs\1client\WT_analysis\more_scans\KIBRA\KIBRA_225-240_output	WT	1client	KKAITCGEKEKQDLIK	unknown
postGMF-runs\1client\WT_analysis\more_scans\KIBRA\KIBRA_233-248_output	WT	1client	KEKQDLIKSLAMLKDG	unknown
postGMF-runs\1client\WT_analysis\more_scans\KIBRA\KIBRA_241-256_output	WT	1client	SLAMLKDGFRTDRGSH	unknown
postGMF-runs\1client\WT_analysis\more_scans\KIBRA\KIBRA_249-264_output	WT	1client	FRTDRGSHSDLWSSSS	unknown
postGMF-runs\1client\WT_analysis\more_scans\KIBRA\KIBRA_25-40_output	WT	1client	IDHTNRTTSWIDPRDR	unknown
postGMF-runs\1client\WT_analysis\more_scans\KIBRA\KIBRA_257-272_output	WT	1client	SDLWSSSSSLESSSFP	unknown
postGMF-runs\1client\WT_analysis\more_scans\KIBRA\KIBRA_265-280_output	WT	1client	SLESSSFPLPKQYLDV	unknown
postGMF-runs\1client\WT_analysis\more_scans\KIBRA\KIBRA_273-288_output	WT	1client	LPKQYLDVSSQTDISG	unknown
postGMF-runs\1client\WT_analysis\more_scans\KIBRA\KIBRA_281-296_output	WT	1client	SSQTDISGSFGINSNN	unknown
postGMF-runs\1client\WT_analysis\more_scans\KIBRA\KIBRA_289-304_output	WT	1client	SFGINSNNQLAEKVRL	unknown
postGMF-runs\1client\WT_analysis\more_scans\KIBRA\KIBRA_297-312_output	WT	1client	QLAEKVRLRLRYEEAK	unknown
postGMF-runs\1client\WT_analysis\more_scans\KIBRA\KIBRA_305-320_output	WT	1client	RLRYEEAKRRIANLKI	unknown
postGMF-runs\1client\WT_analysis\more_scans\KIBRA\KIBRA_313-328_output	WT	1client	RRIANLKIQLAKLDSE	unknown
postGMF-runs\1client\WT_analysis\more_scans\KIBRA\KIBRA_321-336_output	WT	1client	QLAKLDSEAWPGVLDS	unknown
postGMF-runs\1client\WT_analysis\more_scans\KIBRA\KIBRA_329-344_output	WT	1client	AWPGVLDSERDRLILI	unknown
postGMF-runs\1client\WT_analysis\more_scans\KIBRA\KIBRA_33-48_output	WT	1client	SWIDPRDRYTKPLTFA	unknown
postGMF-runs\1client\WT_analysis\more_scans\KIBRA\KIBRA_337-352_output	WT	1client	ERDRLILINEKEELLK	unknown
postGMF-runs\1client\WT_analysis\more_scans\KIBRA\KIBRA_345-360_output	WT	1client	NEKEELLKEMRFISPR	unknown
postGMF-runs\1client\WT_analysis\more_scans\KIBRA\KIBRA_353-368_output	WT	1client	EMRFISPRKWTQGEVE	unknown
postGMF-runs\1client\WT_analysis\more_scans\KIBRA\KIBRA_361-376_output	WT	1client	KWTQGEVEQLEMARKR	unknown
postGMF-runs\1client\WT_analysis\more_scans\KIBRA\KIBRA_369-384_output	WT	1client	QLEMARKRLEKDLQAA	unknown
postGMF-runs\1client\WT_analysis\more_scans\KIBRA\KIBRA_377-392_output	WT	1client	LEKDLQAARDTQSKAL	unknown
postGMF-runs\1client\WT_analysis\more_scans\KIBRA\KIBRA_385-400_output	WT	1client	RDTQSKALTERLKLNS	unknown
postGMF-runs\1client\WT_analysis\more_scans\KIBRA\KIBRA_393-408_output	WT	1client	TERLKLNSKRNQLVRE	unknown
postGMF-runs\1client\WT_analysis\more_scans\KIBRA\KIBRA_401-416_output	WT	1client	KRNQLVRELEEATRQV	unknown
postGMF-runs\1client\WT_analysis\more_scans\KIBRA\KIBRA_409-424_output	WT	1client	LEEATRQVATLHSQLK	unknown
postGMF-runs\1client\WT_analysis\more_scans\KIBRA\KIBRA_41-56_output	WT	1client	YTKPLTFADCISDELP	unknown
postGMF-runs\1client\WT_analysis\more_scans\KIBRA\KIBRA_417-432_output	WT	1client	ATLHSQLKSLSSSMQS	unknown
postGMF-runs\1client\WT_analysis\more_scans\KIBRA\KIBRA_425-440_output	WT	1client	SLSSSMQSLSSGSSPG	unknown
postGMF-runs\1client\WT_analysis\more_scans\KIBRA\KIBRA_433-448_output	WT	1client	LSSGSSPGSLTSSRGS	unknown
postGMF-runs\1client\WT_analysis\more_scans\KIBRA\KIBRA_441-456_output	WT	1client	SLTSSRGSLVASSLDS	unknown
postGMF-runs\1client\WT_analysis\more_scans\KIBRA\KIBRA_449-464_output	WT	1client	LVASSLDSSTSASFTD	unknown
postGMF-runs\1client\WT_analysis\more_scans\KIBRA\KIBRA_457-472_output	WT	1client	STSASFTDLYYDPFEQ	unknown
postGMF-runs\1client\WT_analysis\more_scans\KIBRA\KIBRA_465-480_output	WT	1client	LYYDPFEQLDSELQSK	unknown
postGMF-runs\1client\WT_analysis\more_scans\KIBRA\KIBRA_473-488_output	WT	1client	LDSELQSKVEFLLLEG	unknown
postGMF-runs\1client\WT_analysis\more_scans\KIBRA\KIBRA_481-496_output	WT	1client	VEFLLLEGATGFRPSG	unknown
postGMF-runs\1client\WT_analysis\more_scans\KIBRA\KIBRA_489-504_output	WT	1client	ATGFRPSGCITTIHED	unknown
postGMF-runs\1client\WT_analysis\more_scans\KIBRA\KIBRA_49-64_output	WT	1client	DCISDELPLGWEEAYD	unknown
postGMF-runs\1client\WT_analysis\more_scans\KIBRA\KIBRA_497-512_output	WT	1client	CITTIHEDEVAKTQKA	unknown
postGMF-runs\1client\WT_analysis\more_scans\KIBRA\KIBRA_505-520_output	WT	1client	EVAKTQKAEGGGRLQA	unknown
postGMF-runs\1client\WT_analysis\more_scans\KIBRA\KIBRA_513-528_output	WT	1client	EGGGRLQALRSLSGTP	unknown
postGMF-runs\1client\WT_analysis\more_scans\KIBRA\KIBRA_521-536_output	WT	1client	LRSLSGTPKSMTSLSP	unknown
postGMF-runs\1client\WT_analysis\more_scans\KIBRA\KIBRA_529-544_output	WT	1client	KSMTSLSPRSSLSSPS	unknown
postGMF-runs\1client\WT_analysis\more_scans\KIBRA\KIBRA_537-552_output	WT	1client	RSSLSSPSPPCSPLMA	unknown
postGMF-runs\1client\WT_analysis\more_scans\KIBRA\KIBRA_545-560_output	WT	1client	PPCSPLMADPLLAGDA	unknown
postGMF-runs\1client\WT_analysis\more_scans\KIBRA\KIBRA_553-568_output	WT	1client	DPLLAGDAFLNSLEFE	unknown
postGMF-runs\1client\WT_analysis\more_scans\KIBRA\KIBRA_561-576_output	WT	1client	FLNSLEFEDPELSATL	unknown
postGMF-runs\1client\WT_analysis\more_scans\KIBRA\KIBRA_569-584_output	WT	1client	DPELSATLCELSLGNS	unknown
postGMF-runs\1client\WT_analysis\more_scans\KIBRA\KIBRA_57-72_output	WT	1client	LGWEEAYDPQVGDYFI	unknown
postGMF-runs\1client\WT_analysis\more_scans\KIBRA\KIBRA_577-592_output	WT	1client	CELSLGNSAQERYRLE	unknown
postGMF-runs\1client\WT_analysis\more_scans\KIBRA\KIBRA_585-600_output	WT	1client	AQERYRLEEPGTEGKQ	unknown
postGMF-runs\1client\WT_analysis\more_scans\KIBRA\KIBRA_593-608_output	WT	1client	EPGTEGKQLGQAVNTA	unknown
postGMF-runs\1client\WT_analysis\more_scans\KIBRA\KIBRA_601-616_output	WT	1client	LGQAVNTAQGCGLKVA	unknown
postGMF-runs\1client\WT_analysis\more_scans\KIBRA\KIBRA_609-624_output	WT	1client	QGCGLKVACVSAAVSD	unknown
postGMF-runs\1client\WT_analysis\more_scans\KIBRA\KIBRA_617-632_output	WT	1client	CVSAAVSDESVAGDSG	unknown
postGMF-runs\1client\WT_analysis\more_scans\KIBRA\KIBRA_625-640_output	WT	1client	ESVAGDSGVYEASVQR	unknown
postGMF-runs\1client\WT_analysis\more_scans\KIBRA\KIBRA_633-648_output	WT	1client	VYEASVQRLGASEAAA	unknown
postGMF-runs\1client\WT_analysis\more_scans\KIBRA\KIBRA_641-656_output	WT	1client	LGASEAAAFDSDESEA	unknown
postGMF-runs\1client\WT_analysis\more_scans\KIBRA\KIBRA_649-664_output	WT	1client	FDSDESEAVGATRIQI	unknown
postGMF-runs\1client\WT_analysis\more_scans\KIBRA\KIBRA_65-80_output	WT	1client	PQVGDYFIDHNTKTTQ	unknown
postGMF-runs\1client\WT_analysis\more_scans\KIBRA\KIBRA_657-672_output	WT	1client	VGATRIQIALKYDEKN	unknown
postGMF-runs\1client\WT_analysis\more_scans\KIBRA\KIBRA_665-680_output	WT	1client	ALKYDEKNKQFAILII	unknown
postGMF-runs\1client\WT_analysis\more_scans\KIBRA\KIBRA_673-688_output	WT	1client	KQFAILIIQLSNLSAL	unknown
postGMF-runs\1client\WT_analysis\more_scans\KIBRA\KIBRA_681-696_output	WT	1client	QLSNLSALLQQQDQKV	unknown
postGMF-runs\1client\WT_analysis\more_scans\KIBRA\KIBRA_689-704_output	WT	1client	LQQQDQKVNIRVAVLP	unknown
postGMF-runs\1client\WT_analysis\more_scans\KIBRA\KIBRA_697-712_output	WT	1client	NIRVAVLPCSESTTCL	unknown
postGMF-runs\1client\WT_analysis\more_scans\KIBRA\KIBRA_705-720_output	WT	1client	CSESTTCLFRTRPLDA	unknown
postGMF-runs\1client\WT_analysis\more_scans\KIBRA\KIBRA_713-728_output	WT	1client	FRTRPLDASDTLVFNE	unknown
postGMF-runs\1client\WT_analysis\more_scans\KIBRA\KIBRA_721-736_output	WT	1client	SDTLVFNEVFWVSMSY	unknown
postGMF-runs\1client\WT_analysis\more_scans\KIBRA\KIBRA_729-744_output	WT	1client	VFWVSMSYPALHQKTL	unknown
postGMF-runs\1client\WT_analysis\more_scans\KIBRA\KIBRA_73-88_output	WT	1client	DHNTKTTQIEDPRVQW	unknown
postGMF-runs\1client\WT_analysis\more_scans\KIBRA\KIBRA_737-752_output	WT	1client	PALHQKTLRVDVCTTD	unknown
postGMF-runs\1client\WT_analysis\more_scans\KIBRA\KIBRA_745-760_output	WT	1client	RVDVCTTDRSHLEECL	unknown
postGMF-runs\1client\WT_analysis\more_scans\KIBRA\KIBRA_753-768_output	WT	1client	RSHLEECLGGAQISLA	unknown
postGMF-runs\1client\WT_analysis\more_scans\KIBRA\KIBRA_761-776_output	WT	1client	GGAQISLAEVCRSGER	unknown
postGMF-runs\1client\WT_analysis\more_scans\KIBRA\KIBRA_769-784_output	WT	1client	EVCRSGERSTRWYNLL	unknown
postGMF-runs\1client\WT_analysis\more_scans\KIBRA\KIBRA_777-792_output	WT	1client	STRWYNLLSYKYLKKQ	unknown
postGMF-runs\1client\WT_analysis\more_scans\KIBRA\KIBRA_785-800_output	WT	1client	SYKYLKKQSRELKPVG	unknown
postGMF-runs\1client\WT_analysis\more_scans\KIBRA\KIBRA_793-808_output	WT	1client	SRELKPVGVMAPASGP	unknown
postGMF-runs\1client\WT_analysis\more_scans\KIBRA\KIBRA_801-816_output	WT	1client	VMAPASGPASTDAVSA	unknown
postGMF-runs\1client\WT_analysis\more_scans\KIBRA\KIBRA_809-824_output	WT	1client	ASTDAVSALLEQTAVE	unknown
postGMF-runs\1client\WT_analysis\more_scans\KIBRA\KIBRA_817-832_output	WT	1client	LLEQTAVELEKRQEGR	unknown
postGMF-runs\1client\WT_analysis\more_scans\KIBRA\KIBRA_825-840_output	WT	1client	LEKRQEGRSSTQTLED	unknown
postGMF-runs\1client\WT_analysis\more_scans\KIBRA\KIBRA_833-848_output	WT	1client	SSTQTLEDSWRYEETS	unknown
postGMF-runs\1client\WT_analysis\more_scans\KIBRA\KIBRA_841-856_output	WT	1client	SWRYEETSENEAVAEE	unknown
postGMF-runs\1client\WT_analysis\more_scans\KIBRA\KIBRA_849-864_output	WT	1client	ENEAVAEEEEEEVEEE	unknown
postGMF-runs\1client\WT_analysis\more_scans\KIBRA\KIBRA_857-872_output	WT	1client	EEEEVEEEEGEEDVFT	unknown
postGMF-runs\1client\WT_analysis\more_scans\KIBRA\KIBRA_865-880_output	WT	1client	EGEEDVFTEKASPDMD	unknown
postGMF-runs\1client\WT_analysis\more_scans\KIBRA\KIBRA_873-888_output	WT	1client	EKASPDMDGYPALKVD	unknown
postGMF-runs\1client\WT_analysis\more_scans\KIBRA\KIBRA_881-896_output	WT	1client	GYPALKVDKETNTETP	unknown
postGMF-runs\1client\WT_analysis\more_scans\KIBRA\KIBRA_889-904_output	WT	1client	KETNTETPAPSPTVVR	unknown
postGMF-runs\1client\WT_analysis\more_scans\KIBRA\KIBRA_89-104_output	WT	1client	RREQEHMLKDYLVVAQ	unknown
postGMF-runs\1client\WT_analysis\more_scans\KIBRA\KIBRA_897-912_output	WT	1client	APSPTVVRPKDRRVGT	unknown
postGMF-runs\1client\WT_analysis\more_scans\KIBRA\KIBRA_9-24_output	WT	1client	PEGWEEARDFDGKVYY	unknown
postGMF-runs\1client\WT_analysis\more_scans\KIBRA\KIBRA_905-920_output	WT	1client	PKDRRVGTPSQGPFLR	unknown
postGMF-runs\1client\WT_analysis\more_scans\KIBRA\KIBRA_913-928_output	WT	1client	PSQGPFLRGSTIIRSK	unknown
postGMF-runs\1client\WT_analysis\more_scans\KIBRA\KIBRA_921-936_output	WT	1client	GSTIIRSKTFSPGPQS	unknown
postGMF-runs\1client\WT_analysis\more_scans\KIBRA\KIBRA_929-944_output	WT	1client	TFSPGPQSQYVCRLNR	unknown
postGMF-runs\1client\WT_analysis\more_scans\KIBRA\KIBRA_937-952_output	WT	1client	QYVCRLNRSDSDSSTL	unknown
postGMF-runs\1client\WT_analysis\more_scans\KIBRA\KIBRA_945-960_output	WT	1client	SDSDSSTLSKKPPFVR	unknown
postGMF-runs\1client\WT_analysis\more_scans\KIBRA\KIBRA_953-968_output	WT	1client	SKKPPFVRNSLERRSV	unknown
postGMF-runs\1client\WT_analysis\more_scans\KIBRA\KIBRA_961-976_output	WT	1client	NSLERRSVRMKRPSSV	unknown
postGMF-runs\1client\WT_analysis\more_scans\KIBRA\KIBRA_969-984_output	WT	1client	RMKRPSSVKSLRSERL	unknown
postGMF-runs\1client\WT_analysis\more_scans\KIBRA\KIBRA_97-112_output	WT	1client	KDYLVVAQEALSAQKE	unknown
postGMF-runs\1client\WT_analysis\more_scans\KIBRA\KIBRA_977-992_output	WT	1client	KSLRSERLIRTSLDLE	unknown
postGMF-runs\1client\WT_analysis\more_scans\KIBRA\KIBRA_985-1000_output	WT	1client	IRTSLDLELDLQATRT	unknown
postGMF-runs\1client\WT_analysis\more_scans\KIBRA\KIBRA_993-1008_output	WT	1client	LDLQATRTWHSQLTQE	unknown
postGMF-runs\1client\WT_analysis\more_scans\LCA5\LCA5_1-16_output	WT	1client	MGERAGSPGTDQERKA	unknown
postGMF-runs\1client\WT_analysis\more_scans\LCA5\LCA5_105-120_output	WT	1client	LSARLLKINELQNEVS	unknown
postGMF-runs\1client\WT_analysis\more_scans\LCA5\LCA5_113-128_output	WT	1client	NELQNEVSELQVKLAE	unknown
postGMF-runs\1client\WT_analysis\more_scans\LCA5\LCA5_121-136_output	WT	1client	ELQVKLAELLKENKSL	unknown
postGMF-runs\1client\WT_analysis\more_scans\LCA5\LCA5_129-144_output	WT	1client	LLKENKSLKRLQYRQE	unknown
postGMF-runs\1client\WT_analysis\more_scans\LCA5\LCA5_137-152_output	WT	1client	KRLQYRQEKALNKFED	unknown
postGMF-runs\1client\WT_analysis\more_scans\LCA5\LCA5_145-160_output	WT	1client	KALNKFEDAENEISQL	unknown
postGMF-runs\1client\WT_analysis\more_scans\LCA5\LCA5_153-168_output	WT	1client	AENEISQLIFRHNNEI	unknown
postGMF-runs\1client\WT_analysis\more_scans\LCA5\LCA5_161-176_output	WT	1client	IFRHNNEITALKERLR	unknown
postGMF-runs\1client\WT_analysis\more_scans\LCA5\LCA5_169-184_output	WT	1client	TALKERLRKSQEKERA	unknown
postGMF-runs\1client\WT_analysis\more_scans\LCA5\LCA5_17-32_output	WT	1client	GKHHYSYLSDFETPQS	unknown
postGMF-runs\1client\WT_analysis\more_scans\LCA5\LCA5_177-192_output	WT	1client	KSQEKERATEKRVKDT	unknown
postGMF-runs\1client\WT_analysis\more_scans\LCA5\LCA5_185-200_output	WT	1client	TEKRVKDTESELFRTK	unknown
postGMF-runs\1client\WT_analysis\more_scans\LCA5\LCA5_193-208_output	WT	1client	ESELFRTKFSLQKLKE	unknown
postGMF-runs\1client\WT_analysis\more_scans\LCA5\LCA5_201-216_output	WT	1client	FSLQKLKEISEARHLP	unknown
postGMF-runs\1client\WT_analysis\more_scans\LCA5\LCA5_209-224_output	WT	1client	ISEARHLPERDDLAKK	unknown
postGMF-runs\1client\WT_analysis\more_scans\LCA5\LCA5_217-232_output	WT	1client	ERDDLAKKLVSAELKL	unknown
postGMF-runs\1client\WT_analysis\more_scans\LCA5\LCA5_225-240_output	WT	1client	LVSAELKLDDTERRIK	unknown
postGMF-runs\1client\WT_analysis\more_scans\LCA5\LCA5_233-248_output	WT	1client	DDTERRIKELSKNLEL	unknown
postGMF-runs\1client\WT_analysis\more_scans\LCA5\LCA5_241-256_output	WT	1client	ELSKNLELSTNSFQRQ	unknown
postGMF-runs\1client\WT_analysis\more_scans\LCA5\LCA5_249-264_output	WT	1client	STNSFQRQLLAERKRA	unknown
postGMF-runs\1client\WT_analysis\more_scans\LCA5\LCA5_25-40_output	WT	1client	SDFETPQSSGRSSLVS	unknown
postGMF-runs\1client\WT_analysis\more_scans\LCA5\LCA5_257-272_output	WT	1client	LLAERKRAYEAHDENK	unknown
postGMF-runs\1client\WT_analysis\more_scans\LCA5\LCA5_265-280_output	WT	1client	YEAHDENKVLQKEVQR	unknown
postGMF-runs\1client\WT_analysis\more_scans\LCA5\LCA5_273-288_output	WT	1client	VLQKEVQRLYHKLKEK	unknown
postGMF-runs\1client\WT_analysis\more_scans\LCA5\LCA5_281-296_output	WT	1client	LYHKLKEKERELDIKN	unknown
postGMF-runs\1client\WT_analysis\more_scans\LCA5\LCA5_289-304_output	WT	1client	ERELDIKNIYSNRLPK	unknown
postGMF-runs\1client\WT_analysis\more_scans\LCA5\LCA5_297-312_output	WT	1client	IYSNRLPKSSPNKEKE	unknown
postGMF-runs\1client\WT_analysis\more_scans\LCA5\LCA5_305-320_output	WT	1client	SSPNKEKELALRKNAA	unknown
postGMF-runs\1client\WT_analysis\more_scans\LCA5\LCA5_313-328_output	WT	1client	LALRKNAACQSDFADL	unknown
postGMF-runs\1client\WT_analysis\more_scans\LCA5\LCA5_321-336_output	WT	1client	CQSDFADLCTKGVQTM	unknown
postGMF-runs\1client\WT_analysis\more_scans\LCA5\LCA5_329-344_output	WT	1client	CTKGVQTMEDFKPEEY	unknown
postGMF-runs\1client\WT_analysis\more_scans\LCA5\LCA5_33-48_output	WT	1client	SGRSSLVSSSPASVRR	unknown
postGMF-runs\1client\WT_analysis\more_scans\LCA5\LCA5_337-352_output	WT	1client	EDFKPEEYPLTPETIM	unknown
postGMF-runs\1client\WT_analysis\more_scans\LCA5\LCA5_345-360_output	WT	1client	PLTPETIMCYENKWEE	unknown
postGMF-runs\1client\WT_analysis\more_scans\LCA5\LCA5_353-368_output	WT	1client	CYENKWEEPGHLTLDL	unknown
postGMF-runs\1client\WT_analysis\more_scans\LCA5\LCA5_361-376_output	WT	1client	PGHLTLDLQSQKQDRH	unknown
postGMF-runs\1client\WT_analysis\more_scans\LCA5\LCA5_369-384_output	WT	1client	QSQKQDRHGEAGILNP	unknown
postGMF-runs\1client\WT_analysis\more_scans\LCA5\LCA5_377-392_output	WT	1client	GEAGILNPIMEREEKF	unknown
postGMF-runs\1client\WT_analysis\more_scans\LCA5\LCA5_385-400_output	WT	1client	IMEREEKFVTDEELHV	unknown
postGMF-runs\1client\WT_analysis\more_scans\LCA5\LCA5_393-408_output	WT	1client	VTDEELHVVKQEVEKL	unknown
postGMF-runs\1client\WT_analysis\more_scans\LCA5\LCA5_401-416_output	WT	1client	VKQEVEKLEDEWEREE	unknown
postGMF-runs\1client\WT_analysis\more_scans\LCA5\LCA5_409-424_output	WT	1client	EDEWEREELDKKQKEK	unknown
postGMF-runs\1client\WT_analysis\more_scans\LCA5\LCA5_41-56_output	WT	1client	SSPASVRRKNPKRQTS	unknown
postGMF-runs\1client\WT_analysis\more_scans\LCA5\LCA5_417-432_output	WT	1client	LDKKQKEKASLLEREE	unknown
postGMF-runs\1client\WT_analysis\more_scans\LCA5\LCA5_425-440_output	WT	1client	ASLLEREEKPEWETGR	unknown
postGMF-runs\1client\WT_analysis\more_scans\LCA5\LCA5_433-448_output	WT	1client	KPEWETGRYQLGMYPI	unknown
postGMF-runs\1client\WT_analysis\more_scans\LCA5\LCA5_441-456_output	WT	1client	YQLGMYPIQNMDKLQG	unknown
postGMF-runs\1client\WT_analysis\more_scans\LCA5\LCA5_449-464_output	WT	1client	QNMDKLQGEEEERLKR	unknown
postGMF-runs\1client\WT_analysis\more_scans\LCA5\LCA5_457-472_output	WT	1client	EEEERLKREMLLAKLN	unknown
postGMF-runs\1client\WT_analysis\more_scans\LCA5\LCA5_465-480_output	WT	1client	EMLLAKLNEIDRELQD	unknown
postGMF-runs\1client\WT_analysis\more_scans\LCA5\LCA5_473-488_output	WT	1client	EIDRELQDSRNLKYPV	unknown
postGMF-runs\1client\WT_analysis\more_scans\LCA5\LCA5_481-496_output	WT	1client	SRNLKYPVLPLLPDFE	unknown
postGMF-runs\1client\WT_analysis\more_scans\LCA5\LCA5_489-504_output	WT	1client	LPLLPDFESKLHSPER	unknown
postGMF-runs\1client\WT_analysis\more_scans\LCA5\LCA5_49-64_output	WT	1client	KNPKRQTSDGQVHHQA	unknown
postGMF-runs\1client\WT_analysis\more_scans\LCA5\LCA5_497-512_output	WT	1client	SKLHSPERSPKTYRFS	unknown
postGMF-runs\1client\WT_analysis\more_scans\LCA5\LCA5_505-520_output	WT	1client	SPKTYRFSESSERLFN	unknown
postGMF-runs\1client\WT_analysis\more_scans\LCA5\LCA5_513-528_output	WT	1client	ESSERLFNGHHLQDIS	unknown
postGMF-runs\1client\WT_analysis\more_scans\LCA5\LCA5_521-536_output	WT	1client	GHHLQDISFSTPKGEG	unknown
postGMF-runs\1client\WT_analysis\more_scans\LCA5\LCA5_529-544_output	WT	1client	FSTPKGEGQNSGNVRS	unknown
postGMF-runs\1client\WT_analysis\more_scans\LCA5\LCA5_537-552_output	WT	1client	QNSGNVRSPASPNEFA	unknown
postGMF-runs\1client\WT_analysis\more_scans\LCA5\LCA5_545-560_output	WT	1client	PASPNEFAFGSYVPSF	unknown
postGMF-runs\1client\WT_analysis\more_scans\LCA5\LCA5_553-568_output	WT	1client	FGSYVPSFAKTSERSN	unknown
postGMF-runs\1client\WT_analysis\more_scans\LCA5\LCA5_561-576_output	WT	1client	AKTSERSNPFSQKSSF	unknown
postGMF-runs\1client\WT_analysis\more_scans\LCA5\LCA5_569-584_output	WT	1client	PFSQKSSFLDFQRNSM	unknown
postGMF-runs\1client\WT_analysis\more_scans\LCA5\LCA5_57-72_output	WT	1client	DGQVHHQAPRKPSPKG	unknown
postGMF-runs\1client\WT_analysis\more_scans\LCA5\LCA5_577-592_output	WT	1client	LDFQRNSMEKLSKDGV	unknown
postGMF-runs\1client\WT_analysis\more_scans\LCA5\LCA5_585-600_output	WT	1client	EKLSKDGVDLITRKEK	unknown
postGMF-runs\1client\WT_analysis\more_scans\LCA5\LCA5_593-608_output	WT	1client	DLITRKEKKANLMEQL	unknown
postGMF-runs\1client\WT_analysis\more_scans\LCA5\LCA5_601-616_output	WT	1client	KANLMEQLFGASGSST	unknown
postGMF-runs\1client\WT_analysis\more_scans\LCA5\LCA5_609-624_output	WT	1client	FGASGSSTISSKSSDP	unknown
postGMF-runs\1client\WT_analysis\more_scans\LCA5\LCA5_617-632_output	WT	1client	ISSKSSDPNSVASSKG	unknown
postGMF-runs\1client\WT_analysis\more_scans\LCA5\LCA5_625-640_output	WT	1client	NSVASSKGDIDPLNFL	unknown
postGMF-runs\1client\WT_analysis\more_scans\LCA5\LCA5_633-648_output	WT	1client	DIDPLNFLPGNKGSRD	unknown
postGMF-runs\1client\WT_analysis\more_scans\LCA5\LCA5_641-656_output	WT	1client	PGNKGSRDQEHDEDEG	unknown
postGMF-runs\1client\WT_analysis\more_scans\LCA5\LCA5_649-664_output	WT	1client	QEHDEDEGFFLSEGRS	unknown
postGMF-runs\1client\WT_analysis\more_scans\LCA5\LCA5_65-80_output	WT	1client	PRKPSPKGLPNRKGVR	unknown
postGMF-runs\1client\WT_analysis\more_scans\LCA5\LCA5_657-672_output	WT	1client	FFLSEGRSFNPNRHRL	unknown
postGMF-runs\1client\WT_analysis\more_scans\LCA5\LCA5_665-680_output	WT	1client	FNPNRHRLKHADDKPA	unknown
postGMF-runs\1client\WT_analysis\more_scans\LCA5\LCA5_673-688_output	WT	1client	KHADDKPAVKAADSVE	unknown
postGMF-runs\1client\WT_analysis\more_scans\LCA5\LCA5_681-696_output	WT	1client	VKAADSVEDEIEEVAL	unknown
postGMF-runs\1client\WT_analysis\more_scans\LCA5\LCA5_682-697_output	WT	1client	KAADSVEDEIEEVALR	unknown
postGMF-runs\1client\WT_analysis\more_scans\LCA5\LCA5_73-88_output	WT	1client	LPNRKGVRVGFRSQSL	unknown
postGMF-runs\1client\WT_analysis\more_scans\LCA5\LCA5_81-96_output	WT	1client	VGFRSQSLNREPLRKD	unknown
postGMF-runs\1client\WT_analysis\more_scans\LCA5\LCA5_89-104_output	WT	1client	NREPLRKDTDLVTKRI	unknown
postGMF-runs\1client\WT_analysis\more_scans\LCA5\LCA5_9-24_output	WT	1client	GTDQERKAGKHHYSYL	unknown
postGMF-runs\1client\WT_analysis\more_scans\LCA5\LCA5_97-112_output	WT	1client	TDLVTKRILSARLLKI	unknown
postGMF-runs\1client\WT_analysis\more_scans\MARK3\MARK3_1-16_output	WT	1client	MSTRTPLPTVNERDTE	unknown
postGMF-runs\1client\WT_analysis\more_scans\MARK3\MARK3_105-120_output	WT	1client	RIMKILNHPNIVKLFE	unknown
postGMF-runs\1client\WT_analysis\more_scans\MARK3\MARK3_113-128_output	WT	1client	PNIVKLFEVIETEKTL	unknown
postGMF-runs\1client\WT_analysis\more_scans\MARK3\MARK3_121-136_output	WT	1client	VIETEKTLYLIMEYAS	unknown
postGMF-runs\1client\WT_analysis\more_scans\MARK3\MARK3_129-144_output	WT	1client	YLIMEYASGGEVFDYL	unknown
postGMF-runs\1client\WT_analysis\more_scans\MARK3\MARK3_137-152_output	WT	1client	GGEVFDYLVAHGRMKE	unknown
[truncated: 5,529 more rows]
