# Supplementary material for: Successful prediction of LC8 binding to intrinsically disordered proteins sheds light on AlphaFold’s black box
Source: Front Mol Biosci. 2025 Apr 23;12:1531793. doi: 10.3389/fmolb.2025.1531793 (PMC12057147; doi:10.3389/fmolb.2025.1531793)
Supplement: Supplementary file 23 [file Table5.xlsx]

## Sheet: MI(4.5OMvlin)
	Affinity bins: [0, 0.316, 3.16, 31.6, 100]
	Scores bins: linear based on full dataset
			Dataset	Full	TQT	!TQT	<18 AA	=16	=14	=12	TQT=16	TQT=14	TQT=12	!TQT=16	TQT!=12	TQT!=14	TQT!=12||14
	2client		count	108	77	31	98	54	21	13	30	18	12	24	65	59	47
		Bests	Conf. Score	0.028	0.026	0.035	0.023	0.095	-0.076	0	0.156	-0.089	0	-0.003	0.038	0.047	0.072
			Avg pLDDT	0.06	0.059	0.051	0.071	0.092	0.043	-0.134	0.172	0.051	-0.078	0.058	0.05	0.043	0.05
			L->P PAE	0.059	0.047	0.058	0.076	0.1	0.043	-0.103	0.124	0.051	-0.043	0.077	0.031	0.045	0.022
			P->L PAE	0.028	0.011	0.091	0.045	0.043	-0.101	-0.114	0.088	-0.117	-0.121	0.093	-0.005	0.003	-0.02
			Dimer PAE	0.037	0.034	0.017	0.044	0.082	0.068	0.114	0.09	0.103	0.188	0.04	0.041	0.022	0.013
		Averages	Conf. Score	0.049	0.036	0.103	0.053	0.053	0.129	-0.077	0.049	0.103	-0.039	0.054	0.048	0.011	0.021
			Avg pLDDT	0.037	0.015	0.012	0.031	-0.003	0.052	0.094	0.004	0.083	-0.026	-0.06	0.007	0.002	-0.008
			L->P PAE	0.006	0.022	-0.029	0.003	-0.006	0.03	0.025	0.06	-0.003	0.038	-0.066	0.033	0.019	0.036
			P->L PAE	0.033	0.026	0.011	0.022	0.023	0.06	-0.094	0.091	0.068	-0.026	-0.021	0.023	0.023	0.027
			Dimer PAE	-0.005	0.063	-0.012	-0.009	-0.037	0.061	-0.106	0.056	0.22	-0.118	-0.05	0.078	0.025	0.031
	1client		count	109	76	33	104	63	21	10	36	18	9	27	67	58	49
		Bests	Conf. Score	0.093	0.097	0.148	0.081	0.075	0.089	-0.125	0.072	0.06	-0.098	0.15	0.113	0.062	0.076
			Avg pLDDT	0.036	0.045	0.054	0.037	0.025	-0.026	0	0.037	-0.03	0	0.065	0.053	0.021	0.027
			L->P PAE	0.018	0.031	-0.008	0.019	0.026	0.012	0	0.037	-0.03	0	0.044	0.038	0.022	0.029
			P->L PAE	0.034	0.036	-0.006	0.036	0.042	0.012	-0.125	0.04	-0.03	-0.098	-0.016	0.037	0.012	0.027
			Dimer PAE	0.081	0.069	0.101	0.092	0.13	0.229	0.177	0.142	0.186	0.29	0.124	0.112	0.035	0.068
		Averages	Conf. Score	0.052	0.049	0.061	0.053	0.044	0.297	0.112	0.057	0.321	0.014	0.059	0.076	0.021	0.047
			Avg pLDDT	0.064	0.043	0.125	0.064	0.106	0.336	0.214	0.055	0.366	0.014	0.225	0.064	0.026	0.045
			L->P PAE	0.054	0.032	0.093	0.055	0.088	0.396	0.137	0.035	0.437	0.098	0.173	0.059	0.01	0.024
			P->L PAE	0.063	0.037	0.137	0.065	0.107	0.367	0.137	0.075	0.409	0.098	0.19	0.066	0.02	0.054
			Dimer PAE	0.063	0.064	0.133	0.068	0.099	0.228	0.058	0.057	0.306	0.121	0.216	0.071	0.019	0.012
	Success Rate		count	89	60	29	81	40	21	12	18	18	11	22	49	42	31
			correlation	0.113	0.169	0.094	0.102	0.046	0.307	-0.039	-0.006	0.502	0.019	0.206	0.196	0.123	0.13
