# Supplementary material for: Successful prediction of LC8 binding to intrinsically disordered proteins sheds light on AlphaFold’s black box
Source: Front Mol Biosci. 2025 Apr 23;12:1531793. doi: 10.3389/fmolb.2025.1531793 (PMC12057147; doi:10.3389/fmolb.2025.1531793)
Supplement: Supplementary file 25 [file Table8.xlsx]

## Sheet: MI(7.5OMvlin)
	Affinity bins: [0, 0.316, 1, 3.16, 10, 31.6, 100]
	Scores bins: linear based on full dataset
			Dataset	Full	TQT	!TQT	<18 AA	=16	=14	=12	TQT=16	TQT=14	TQT=12	!TQT=16	TQT!=12	TQT!=14	TQT!=12||14
	2client		count	108	77	31	98	54	21	13	30	18	12	24	65	59	47
		Bests	Conf. Score	0.011	0.015	0.005	0.026	0.052	-0.03	0	0.134	-0.045	0	0.001	0.025	0.01	0.032
			Avg pLDDT	0.112	0.153	0.004	0.17	0.162	0.025	0.055	0.435	0.006	0.116	-0.016	0.126	0.184	0.174
			L->P PAE	0.104	0.178	0.028	0.2	0.156	0.025	0.205	0.368	0.006	0.285	0.038	0.129	0.233	0.178
			P->L PAE	0.063	0.107	0.014	0.117	0.073	0.048	0.002	0.273	0.016	0.0001	-0.004	0.098	0.138	0.117
			Dimer PAE	0.042	0.108	-0.022	0.11	0.064	0.092	0.183	0.277	0.138	0.25	0.056	0.121	0.119	0.109
		Averages	Conf. Score	0.038	0.059	0.119	0.069	0.038	0.029	0.051	0.149	0.004	0.096	0.096	0.064	0.052	0.059
			Avg pLDDT	0.066	0.08	0.121	0.054	0.025	0.128	0.161	0.062	0.212	0.236	0.101	0.055	0.117	0.076
			L->P PAE	0.059	0.137	0.113	0.108	0.066	0.017	0.329	0.147	0.101	0.375	0.131	0.153	0.154	0.157
			P->L PAE	0.075	0.107	-0.003	0.082	0.061	0.189	0.161	0.152	0.366	0.236	0.024	0.134	0.103	0.126
			Dimer PAE	0.045	0.119	-0.031	0.103	0.048	0.009	0.05	0.231	0.079	0.067	-0.06	0.132	0.163	0.185
	1client		count	109	76	33	104	63	21	10	36	18	9	27	67	58	49
		Bests	Conf. Score	0.148	0.189	0.067	0.181	0.14	0.138	0.067	0.225	0.102	0.126	0.055	0.212	0.17	0.191
			Avg pLDDT	0.103	0.14	0.023	0.135	0.089	0.062	0	0.14	0.044	0	0.015	0.155	0.152	0.171
			L->P PAE	0.099	0.154	-0.027	0.149	0.077	0.08	0	0.14	0.044	0	0.001	0.17	0.155	0.174
			P->L PAE	0.104	0.148	-0.014	0.142	0.098	0.08	0.067	0.151	0.044	0.126	-0.037	0.165	0.158	0.171
			Dimer PAE	0.107	0.163	0.023	0.187	0.102	0.313	0.221	0.194	0.246	0.317	-0.008	0.176	0.17	0.181
		Averages	Conf. Score	0.102	0.177	0.031	0.177	0.121	0.243	0.22	0.274	0.223	0.175	0.066	0.199	0.203	0.255
			Avg pLDDT	0.1	0.135	0.06	0.128	0.162	0.196	0.282	0.185	0.204	0.175	0.127	0.154	0.164	0.186
			L->P PAE	0.086	0.107	0.066	0.097	0.128	0.321	0.185	0.143	0.312	0.164	0.127	0.122	0.134	0.147
			P->L PAE	0.085	0.104	0.071	0.095	0.116	0.253	0.185	0.12	0.253	0.164	0.094	0.122	0.12	0.126
			Dimer PAE	0.081	0.113	0.121	0.119	0.164	0.111	0.268	0.184	0.211	0.349	0.169	0.102	0.119	0.084
	Success Rate		count	89	60	29	81	40	21	12	18	18	11	22	49	42	31
			correlation	0.118	0.167	0.042	0.138	0.063	0.205	0.19	-0.051	0.337	0.252	0.179	0.193	0.122	0.138
